# Supplementary material for: Highly regioselective Lewis acid-catalyzed [3+2] cycloaddition of alkynes with donor–acceptor oxiranes by selective carbon–carbon bond cleavage of epoxides
Source: Royal Society of Chemistry journal article supplement (doi:10.1039/c1cc15669a), 2011-01-01
Supplement: c1cc15669a.pdf [file c1cc15669a.pdf]

## Supporting Information

### Highly Regioselective Lewis Acid-Catalyzed [3+2] Cycloadditions of Alkynes with Donor-acceptor Oxiranes by Selective Carbon-Carbon Bond Cleavage of Epoxides.

Renrong Liu,<sup>a</sup> Mei Zhang,<sup>a</sup> and Junliang Zhang\*<sup>a,b</sup>

<sup>a</sup> *Shanghai Key Laboratory of Green Chemistry and Chemical Processes, Department of Chemistry, East China Normal University, 3663 N. Zhongshan Road, Shanghai 200062, P. R. China*

*Fax: (+86)-021-6223-5039; e-mail :jlzhang@chem.ecnu.edu.cn*

<sup>b</sup> *State key Laboratory of Organometallic Chemistry, Shanghai Institute of Organic Chemistry, Chinese Academy of Sciences.*

**General Information.** Infrared (IR) spectra were obtained using a Bruker tensor 27 infrared spectrometer.  $^1\text{H}$  NMR spectra,  $^{13}\text{C}$  NMR spectra were recorded on a Bruker 400 MHz spectrometer in chloroform- $\text{d}_3$ . All signals are reported in ppm with the internal TMS signal at 0 ppm as a standard. The data is being reported as (s = singlet, d = doublet, t = triplet, m = multiplet or unresolved, br = broad signal, coupling constant(s) in Hz, integration). Reactions were monitored by thin layer chromatography (TLC) using silica gel plates. Flash column chromatography was performed over silica gel (300-400 mesh). All reactions were carried out under an atmosphere of nitrogen in flame-dried glassware with magnetic stirring.  $\text{ClCH}_2\text{CH}_2\text{Cl}$  (DCE), was freshly distilled from  $\text{CaH}_2$ ; toluene was freshly distilled from sodium metal prior to use. Lewis-acid purchased from Alfa or Aldrich were used directly. Commercially available reagents were used without further purification. 4 Å molecular sieves purchased from Sinopharm Chemical Reagent Co.,Ltd were powdered and dried at 300 °C in muffle furnace for 8-10 hours prior to use.

**Table 1.** Screening Reaction Conditions.<sup>a</sup>

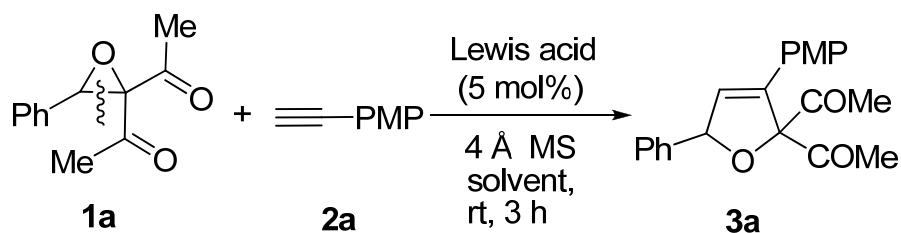

| Entry | Catalyst                                              | Solvent | Yield <b>3a</b> (%) <sup>b</sup> |
|-------|-------------------------------------------------------|---------|----------------------------------|
| 1     | Sc(OTf) <sub>3</sub>                                  | DCE     | 98                               |
| 2     | Yb(OTf) <sub>3</sub>                                  | DCE     | 73                               |
| 3     | Y(OTf) <sub>3</sub>                                   | DCE     | 67                               |
| 4     | In(OTf) <sub>3</sub>                                  | DCE     | 92                               |
| 5     | Sn(OTf) <sub>2</sub>                                  | DCE     | 78                               |
| 6     | Ni(ClO <sub>4</sub> ) <sub>2</sub> ·6H <sub>2</sub> O | DCE     | 67                               |
| 7     | Sc(OTf) <sub>3</sub>                                  | DCM     | 95                               |
| 8     | Sc(OTf) <sub>3</sub>                                  | toluene | 82                               |
| 9     | ----- <sup>c</sup>                                    | DCE     | 0                                |
| 10    | ----- <sup>d</sup>                                    | DCE     | 9                                |
| 11    | ----- <sup>e</sup>                                    | PhCl    | 5                                |

<sup>a</sup> Reaction conditions: **1a** (0.2 mmol), **2a** (0.4 mmol), 5 mol % of catalyst, and 80 mg of activated 4 Å MS in 2 mL of solvent at room temperature. <sup>b</sup> Isolated yield and no other stereoisomer is detected. PMP = 4-MeOC<sub>6</sub>H<sub>4</sub>. <sup>c</sup> No Lewis acid was added. <sup>d</sup> No Lewis acid was added, 100°C in sealed tube, 12 hours. <sup>e</sup> No Lewis acid was added, 160°C, 10 hours.

### Synthesis of Oxiranyl diketones

The substrate **1a-1m**, **5**, **6** were synthesized according to the procedure of references.<sup>[1],[2]</sup> The spectral data of **1a-1b**,<sup>[4]</sup> **1h-1j**,<sup>[2]</sup> **1l**,<sup>[3]</sup> **1m**<sup>[1]</sup> are consisted with the literature.

#### 1. 1,1'-(3-*p*-Tolyloxirane-2,2-diyl)diethanone (**1c**)

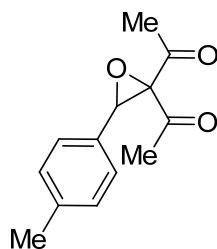

Colorless oil.  $^1\text{H}$  NMR (400 MHz,  $\text{CDCl}_3$ )  $\delta_{\text{H}}$  7.16 (s, 4 H), 4.37 (s, 1 H), 2.33 (s, 3 H), 2.28 (s, 3 H), 1.64 (s, 3 H);  $^{13}\text{C}$  NMR (100 MHz,  $\text{CDCl}_3$ )  $\delta_{\text{C}}$  201.8, 199.5, 139.2, 129.4, 128.7, 126.0, 72.7, 62.1, 29.8, 25.2, 21.2 ppm; IR (neat)  $\nu$  ( $\text{cm}^{-1}$ ) 3664, 2987, 2902, 1700, 1407, 1252, 1066, 1055, 870, 812; MS (70 eV):  $m/z$  (%): 218 (0.49) [ $\text{M}^+$ ], 43 (100); HRMS calcd for  $\text{C}_{13}\text{H}_{14}\text{O}_3$ : 218.0943, found: 218.0944.

## 2. 1,1'-(3-(4-Bromophenyl)oxirane-2,2-diyl)diethanone (1d)

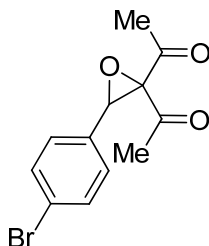

White solid, m.p. 121-122°C.  $^1\text{H}$  NMR (400 MHz,  $\text{CDCl}_3$ )  $\delta_{\text{H}}$  7.49 (d, 2 H,  $J = 8.0$  Hz), 7.17 (d, 2 H,  $J = 8.0$  Hz), 4.37 (s, 1 H), 2.28 (s, 3 H), 2.03 (s, 3 H);  $^{13}\text{C}$  NMR (100 MHz,  $\text{CDCl}_3$ )  $\delta_{\text{C}}$  201.3, 198.8, 131.9, 130.7, 127.8, 123.4, 72.4, 61.3, 29.7, 25.2 ppm; IR (neat)  $\nu$  ( $\text{cm}^{-1}$ ) 3089, 2989, 1718, 1699, 1490, 1413, 1360, 1255, 1169, 1086, 1071, 1011, 890, 807, 642; MS (70 eV):  $m/z$  (%): 282 (0.18) [ $\text{M}^+$ ], 284 (0.21) [ $\text{M}^+ + 2$ ], 43 (100); HRMS calcd for  $\text{C}_{12}\text{H}_{11}\text{O}_3\text{Br}$ : 281.9892, found: 281.9894.

## 3. 1,1'-(3-(2-Bromophenyl)oxirane-2,2-diyl)diethanone (1e)

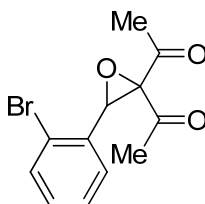

White solid, m.p. 71-73 °C.  $^1\text{H}$  NMR (400 MHz,  $\text{CDCl}_3$ )  $\delta_{\text{H}}$  7.55 (d, 1 H,  $J = 8.0$  Hz), 7.30-7.34 (m, 2 H), 7.23-7.26 (m, 1 H), 4.50 (s, 1 H), 2.35 (s, 3 H), 2.06 (s, 3 H);  $^{13}\text{C}$  NMR (100 MHz,  $\text{CDCl}_3$ )  $\delta_{\text{C}}$  201.1, 198.7, 132.4, 131.3, 130.6, 127.9, 127.6, 122.2, 71.7, 62.4, 29.6, 25.5 ppm; IR (neat)  $\nu$  ( $\text{cm}^{-1}$ ) 3005, 1712, 1519, 1391, 1353, 1247, 1175, 1104, 1029; MS (70 eV):  $m/z$  (%): 282 (3.53) [ $\text{M}^+$ ], 284 (3.41) [ $\text{M}^+ + 2$ ], 43 (100); HRMS calcd for  $\text{C}_{12}\text{H}_{11}\text{O}_3\text{Br}$  ( $\text{M}^+$ ): 281.9892, found: 281.9892.

## 4. 1,1'-(3-(3-Bromophenyl)oxirane-2,2-diyl)diethanone (1f)

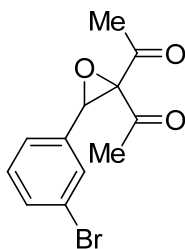

Yellow oil,  $^1\text{H}$  NMR (400 MHz,  $\text{CDCl}_3$ )  $\delta_{\text{H}}$  7.46-7.50 (m, 2 H), 7.19-7.28 (m, 2 H), 4.36 (s, 1 H), 2.28 (s, 3 H), 2.05 (s, 3 H);  $^{13}\text{C}$  NMR (100 MHz,  $\text{CDCl}_3$ )  $\delta_{\text{C}}$  201.1, 198.8, 134.0, 132.4, 130.3, 129.3, 124.7, 122.8, 72.3, 61.1, 29.8, 25.3 ppm; IR (neat)  $\nu$  ( $\text{cm}^{-1}$ ) 3066, 2926, 1706, 1570, 1421, 1360, 1250, 1170, 1100, 1071; MS (70 eV):  $m/z$  (%): 282 (18.0) [ $\text{M}^+$ ], 282 (16.0) [ $\text{M}^++2$ ], 126.9 (100); HRMS calcd for  $\text{C}_{12}\text{H}_{11}\text{O}_3\text{Br}$  ( $\text{M}^+$ ): 281.9892, found: 281.9895.

#### 5. 1,1'-(3-(4-Fluorophenyl)oxirane-2,2-diyl)diethanone (1g)

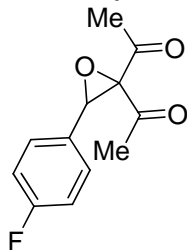

Colorless oil,  $^1\text{H}$  NMR (400 MHz,  $\text{CDCl}_3$ )  $\delta_{\text{H}}$  7.27 (s, 2 H), 7.06 (t, 2 H,  $J = 8.4$  Hz), 4.38 (s, 1 H), 2.28 (s, 3 H), 2.03 (s, 3 H);  $^{13}\text{C}$  NMR (100 MHz,  $\text{CDCl}_3$ )  $\delta_{\text{C}}$  201.5, 199.1, 163.1 (d,  $^1J_{\text{C},\text{F}} = 248$  Hz), 128.1, (d,  $^3J_{\text{C},\text{F}} = 9$  Hz), 127.5, 115.9 (d,  $^2J_{\text{C},\text{F}} = 22$  Hz), 72.6, 61.4, 29.8, 25.3 ppm; IR (neat)  $\nu$  ( $\text{cm}^{-1}$ ) 1725, 1708, 1608, 1513, 1421, 1361, 1289, 1228, 1158, 1101; MS (70 eV):  $m/z$  (%): 222 (9.51) [ $\text{M}^+$ ], 43 (100); HRMS calcd for  $\text{C}_{12}\text{H}_{11}\text{O}_3\text{F}$ : 222.0692, found: 222.0694.

#### 6. Ethyl 2-acetyl-3-phenyloxirane-2-carboxylate (1k)

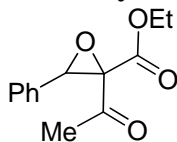

Colorless oil,  $^1\text{H}$  NMR (400 MHz,  $\text{CDCl}_3$ )  $\delta_{\text{H}}$  7.33 (s, 5 H), 4.43 (s, 1 H), 3.97-4.07 (m, 2 H), 2.32 (s, 3 H), 0.95 (t, 3 H,  $J = 7.2$  Hz);  $^{13}\text{C}$  NMR (100 MHz,  $\text{CDCl}_3$ )  $\delta_{\text{C}}$  199.4, 163.9, 132.0, 129.0, 128.3, 126.0, 68.2, 61.9, 61.7, 25.2, 13.6 ppm; IR (neat)  $\nu$  ( $\text{cm}^{-1}$ ) 2984, 1748, 1714, 1457, 1372, 1314, 1257, 1221, 1200, 1109, 1031; MS (70 eV):  $m/z$  (%): 234 (9.07) [ $\text{M}^+$ ], 43 (100); HRMS calcd for  $\text{C}_{13}\text{H}_{14}\text{O}_4$ : 234.0892, found: 234.0893.

### 7. Dimethyl 3-(2-(3-phenylprop-2-ynoxy)phenyl)oxirane-2,2-dicarboxylate (5)

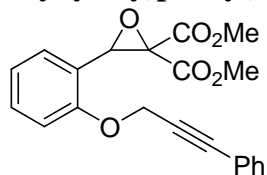

Colorless oil,  $^1\text{H}$  NMR (400 MHz,  $\text{CDCl}_3$ )  $\delta_{\text{H}}$  7.41 (d, 2 H,  $J = 7.6$  Hz), 7.25-7.32 (m, 4 H), 7.23 (d, 1 H,  $J = 7.2$  Hz), 7.11 (d, 1 H,  $J = 8.0$  Hz), 6.96 (t, 1 H,  $J = 7.2$  Hz), 5.00 (d, 1 H,  $J = 17.6$  Hz), 4.96 (d, 1 H,  $J = 17.6$  Hz), 4.83 (s, 1 H), 3.87 (s, 3 H), 3.52 (s, 3 H);  $^{13}\text{C}$  NMR (100 MHz,  $\text{CDCl}_3$ )  $\delta_{\text{C}}$  166.0, 164.1, 156.5, 131.7, 130.0, 128.7, 128.3, 126.2, 122.1, 121.2, 121.1, 112.2, 87.5, 83.6, 62.6, 59.2, 57.0, 53.4, 52.5 ppm; IR (neat)  $\nu$  ( $\text{cm}^{-1}$ ) 3658, 2955, 1750, 1604, 1492, 1439, 1372, 1335, 1274, 1238, 1219, 1190, 1163, 1121, 1047, 1016; ESI-MS:  $m/z$ : 367.0  $[\text{M}+\text{H}]^+$ ; HR-ESI-MS calcd for  $\text{C}_{21}\text{H}_{19}\text{O}_6$   $[\text{M}+\text{H}]^+$ : 367.11739, found: 367.11761.

### 8. Dimethyl 3-(2-(3-(4-methoxyphenyl)prop-2-ynoxy)phenyl)oxirane-2,2-dicarboxylate (6)

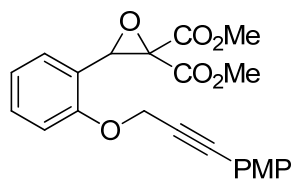

White solid, m.p. 118-120 °C.  $^1\text{H}$  NMR (400 MHz,  $\text{CDCl}_3$ )  $\delta_{\text{H}}$  7.29-7.37 (m, 3 H), 7.22 (d, 1 H,  $J = 7.6$  Hz), 7.11 (d, 1 H,  $J = 8.0$  Hz), 6.95 (t, 1 H,  $J = 7.2$  Hz), 6.82 (d, 2 H,  $J = 8.0$  Hz), 4.98 (d, 1 H,  $J = 14.0$  Hz), 4.94 (d, 1 H,  $J = 14.0$  Hz), 4.83 (s, 1 H), 3.86 (s, 3 H), 3.79 (s, 3 H), 3.52 (s, 3 H);  $^{13}\text{C}$  NMR (100 MHz,  $\text{CDCl}_3$ )  $\delta_{\text{C}}$  166.0, 164.1, 159.9, 156.5, 133.2, 129.9, 126.2, 121.2, 121.0, 114.1, 113.9, 112.2, 87.4, 82.3, 62.6, 59.2, 57.1, 55.2, 53.4, 52.5 ppm; IR (neat)  $\nu$  ( $\text{cm}^{-1}$ ) 3652, 2955, 1751, 1605, 1510, 1493, 1457, 1439, 1335, 1290, 1244, 1219, 1174, 1121, 1108, 1030; MS (70 eV):  $m/z$  (%): 396 (0.23)  $[\text{M}^+]$ , 145 (100); HRMS calcd for  $\text{C}_{22}\text{H}_{20}\text{O}_7$  (M) $^+$ : 396.1209, found: 396.1209.

### Typical procedure for $\text{Sc}(\text{OTf})_3$ catalyzed [3+2] cycloaddition reaction.

In an inert atmosphere glovebox, a flame-dried vial was charged with 80 mg of activated 4Å molecular sieves powder (MS), and a magnetic stir bar. Outside of the glovebox, the vial was placed under an  $\text{N}_2$  atmosphere and added the alkyl 2 (0.4 mmol), oxirane 1 (0.2 mmol) and 2 mL of DCE were added followed by 5 mol %

Sc(OTf)<sub>3</sub>, The reaction was stirred at room temperature and detected by TLC, the reaction mixture was then passed over a plug of silica with 30 mL of EtOAc. The solvent was removed under reduced pressure and the residue was purified by flash chromatography, eluting with (hexanes: EtOAc = 5:1) to afford the desired product.

**9. 1,1'-(3-(4-Methoxyphenyl)-5-phenyl-2,5-dihydrofuran-2,2-diyl)diethanone (3a)**

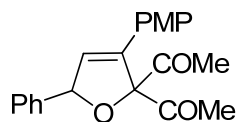

The reaction of **1a** (40.8 mg, 0.2 mmol), **2a** (55 μL, 0.4 mmol), 80 mg of 4Å MS and 5 mol % Sc(OTf)<sub>3</sub> (0.01 mmol, 4.9 mg) in DCE (2 mL) was carried out at r.t. for 3 hours to afford 65.6 mg (89%) of **3a**, white solid, m.p. 118-120 °C. <sup>1</sup>H NMR (400 MHz, CDCl<sub>3</sub>) δ<sub>H</sub> 7.32-7.39 (m, 7 H), 6.83 (d, 2 H, *J* = 8.0 Hz), 6.43 (s, 1 H), 6.08 (s, 1 H), 3.78 (s, 3 H), 2.32 (s, 3 H), 2.17 (s, 3 H); <sup>13</sup>C NMR (100 MHz, CDCl<sub>3</sub>) δ<sub>C</sub> 206.4, 205.1, 159.9, 139.4, 139.2, 129.2, 128.9, 127.5, 127.4, 123.8, 113.9, 101.0, 88.8, 55.3, 26.7, 26.0; MS (70 eV): IR (neat) ν (cm<sup>-1</sup>) 3072, 3013, 2935, 2839, 1721, 1707, 1606, 1574, 1518, 1490, 1355, 1302, 1282, 1262, 1221, 1117, 1085, 1026; MS (70 eV): *m/z* (%): 336 (0.65) [M<sup>+</sup>], 43 (100); HRMS calcd for C<sub>21</sub>H<sub>20</sub>O<sub>4</sub> (M)<sup>+</sup>: 336.1362, found: 336.1367.

**10. 1,1'-(4-Butyl-3-(4-methoxyphenyl)-5-phenyl-2,5-dihydrofuran-2,2-diyl)diethanone (3b)**

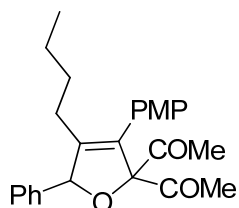

The reaction of **1a** (40.8 mg, 0.2 mmol), **2b** (76.2 mg, 0.4 mmol), 80 mg of 4Å MS and 5 mol % Sc(OTf)<sub>3</sub> (0.01 mmol, 4.9 mg) in DCE (2 mL) was carried out at r.t. for 3 hours to afford 69.3 mg (88%) of **3b**, yellow oil. <sup>1</sup>H NMR (400 MHz, CDCl<sub>3</sub>) δ<sub>H</sub> 7.37-7.44 (m, 3 H), 7.34 (d, 2 H, *J* = 7.2 Hz), 7.15 (d, 2 H, *J* = 8.4 Hz), 6.87 (d, 2 H, *J* = 8.4 Hz), 5.93 (s, 1 H), 3.80 (s, 3 H), 2.34 (s, 3 H), 2.13-2.22 (m, 1 H), 2.13 (s, 3 H), 1.70-1.75 (m, 1 H), 1.09-1.26 (m, 4 H), 0.73 (t, 3 H, *J* = 6.4 Hz); <sup>13</sup>C NMR (100 MHz, CDCl<sub>3</sub>) δ<sub>C</sub> 206.0, 204.9, 159.1, 143.8, 139.0, 133.0, 130.9, 128.9, 128.8, 127.9, 124.6,

113.6, 102.6, 90.9, 55.1, 29.6, 27.0, 26.0, 25.8, 22.3, 13.6 ppm; IR (neat)  $\nu$  ( $\text{cm}^{-1}$ ) 2956, 2933, 2861, 1711, 1608, 1511, 1457, 1352, 1248, 1179, 1125, 1061, 1032; MS (70 eV):  $m/z$  (%): 392 (0.28) [ $\text{M}^+$ ], 43 (100); HRMS calcd for  $\text{C}_{25}\text{H}_{28}\text{O}_4(\text{M})^+$ : 392.1988, found: 392.1989.

**11. 1,1'-(4-Cyclopropyl-3-(4-methoxyphenyl)-5-phenyl-2,5-dihydrofuran-2,2-diyl) diethanone (3c)**

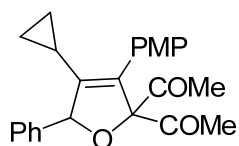

The reaction of **1a** (40.8 mg, 0.2 mmol), **2c** (69 mg, 0.4 mmol), 80 mg of 4Å MS and 5 mol %  $\text{Sc}(\text{OTf})_3$  (0.01 mmol, 4.9 mg) in DCE (2 mL) was carried out at r.t. for 3 hours to afford 69 mg (92%) of **3c**, colorless oil.  $^1\text{H}$  NMR (400 MHz,  $\text{CDCl}_3$ )  $\delta_{\text{H}}$  7.30-7.42 (m, 7 H), 6.88 (d, 2 H,  $J = 7.6$  Hz), 5.73 (s, 1 H), 3.80 (s, 3 H), 2.32 (s, 3 H), 2.08 (s, 3 H), 1.40-1.45 (m, 1 H), 0.54-0.60 (m, 1 H), 0.40-0.50 (m, 2 H), 0.01-0.06 (m, 1 H);  $^{13}\text{C}$  NMR (100 MHz,  $\text{CDCl}_3$ )  $\delta_{\text{C}}$  206.2, 205.2, 159.0, 142.6, 139.4, 133.3, 131.1, 128.9, 128.7, 128.0, 124.5, 113.5, 102.2, 90.1, 55.1, 26.9, 25.8, 9.3, 6.6, 5.9 ppm; IR (neat)  $\nu$  ( $\text{cm}^{-1}$ ) 3006, 2960, 2837, 1753, 1710, 1669, 1607, 1572, 1543, 1458, 1418, 1352, 1290, 1247, 1177, 1077, 1029; MS (70 eV):  $m/z$  (%): 376 (0.01) [ $\text{M}^+$ ], 43 (100); HRMS calcd for  $\text{C}_{24}\text{H}_{24}\text{O}_4(\text{M})^+$ : 376.1675, found: 376.1676.

**12. 1,1'-(5-Phenyl-3-(thiophen-2-yl)-2,5-dihydrofuran-2,2-diyl)diethanone (3d)**

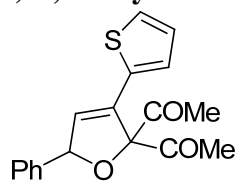

The reaction of **1a** (40.8 mg, 0.2 mmol), **2d** (44 mg, 0.4 mmol), 80 mg of 4Å MS and 5 mol %  $\text{Sc}(\text{OTf})_3$  (0.01 mmol, 4.9 mg) in DCE (2 mL) was carried out at r.t. for 3 hours to afford 55.8 mg (90%) of **3d**, colorless oil.  $^1\text{H}$  NMR (400 MHz,  $\text{CDCl}_3$ )  $\delta_{\text{H}}$  7.30-7.39 (m, 5 H), 7.21-7.23 (m, 1 H), 7.06 (s, 1 H), 6.95 (d, 1 H,  $J = 3.2$  Hz), 6.40 (s, 1 H), 6.10 (s, 1 H), 2.32 (s, 3 H), 2.17 (s, 3 H);  $^{13}\text{C}$  NMR (100 MHz,  $\text{CDCl}_3$ )  $\delta_{\text{C}}$  205.8, 204.2, 138.9, 133.7, 133.3, 128.83, 128.78, 128.6, 128.0, 127.8, 127.2, 125.9, 100.8, 88.8, 26.4, 25.6 ppm; IR (neat)  $\nu$  ( $\text{cm}^{-1}$ ) 3105, 3070, 3030, 2924, 2856, 1726, 1710, 1624, 1493, 1454, 1301, 1211, 1080, 1038, 1001; MS (70 eV):  $m/z$  (%): 312 (0.12) [ $\text{M}^+$ ], 105 (100); HRMS calcd for  $\text{C}_{18}\text{H}_{16}\text{O}_3\text{S}(\text{M})^+$ : 310.0820, found: 310.0817.



**13. 1,1'-(5-Phenyl-3-p-tolyl-2,5-dihydrofuran-2,2-diyl)diethanone (3e).**

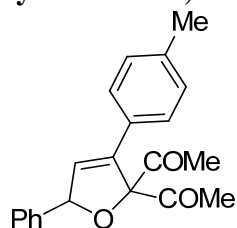

The reaction of **1a** (40.8 mg, 0.2 mmol), **2e** (55  $\mu$ L, 0.4 mmol), 80 mg of 4Å MS and 5 mol % Sc(OTf)<sub>3</sub> (0.01 mmol, 4.9 mg) in DCE (2 mL) was carried out at r.t. for 3 hours to afford 43.5 mg (68%) of **3e**, colorless oil. <sup>1</sup>H NMR (400 MHz, CDCl<sub>3</sub>)  $\delta_H$  7.30-7.39 (m, 7 H), 7.11 (d, 2 H, *J* = 8.0 Hz), 6.50 (s, 1 H), 6.08 (s, 1 H), 2.32 (s, 6 H), 2.17 (s, 3 H); <sup>13</sup>C NMR (100 MHz, CDCl<sub>3</sub>)  $\delta_C$  206.1, 204.8, 139.5, 139.2, 138.6, 129.1, 128.8, 128.6, 128.3, 127.6, 127.3, 126.4, 100.9, 88.7, 26.6, 25.9, 21.2 ppm; IR (neat)  $\nu$  (cm<sup>-1</sup>) 3031, 2921, 2861, 1710, 1672, 1605, 1512, 1475, 1451, 1415, 1352, 1251, 1071, 1028, 1002; MS (70 eV): *m/z* (%): 320 (0.90) [M<sup>+</sup>], 43 (100); HRMS calcd for C<sub>21</sub>H<sub>20</sub>O<sub>3</sub> (M)<sup>+</sup>: 320.1412, found: 320.1411.

**14. 1,1'-(4-(3-Chloropropyl)-3-(4-methoxyphenyl)-5-phenyl-2,5-dihydrofuran-2,2-diyl)diethanone (3f)**

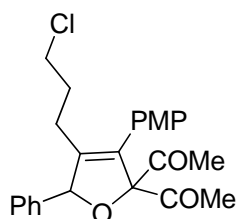

The reaction of **1a** (40.8 mg, 0.2 mmol), **2f** (84 mg, 0.4 mmol), 80 mg of 4Å MS and 5 mol % Sc(OTf)<sub>3</sub> (0.01 mmol, 4.9 mg) in DCE (2 mL) was carried out at r.t. for 3 hours to afford 79 mg (96%) of **3f**, colorless oil. <sup>1</sup>H NMR (400 MHz, CDCl<sub>3</sub>)  $\delta_H$  7.38-7.45 (m, 3 H), 7.35 (d, 2 H, *J* = 7.6 Hz), 7.15 (d, 2 H, *J* = 8.4 Hz), 6.87 (d, 2 H, *J* = 8.4 Hz), 5.90 (s, 1 H), 3.79 (s, 3 H), 3.26-3.36 (m, 2 H), 2.30-2.40 (m, 1 H), 2.33 (s, 3 H), 2.15 (s, 3 H), 1.89-1.99 (m, 1 H), 1.59-1.76 (m, 2 H); <sup>13</sup>C NMR (100 MHz, CDCl<sub>3</sub>)  $\delta_C$  205.5, 204.7, 159.3, 141.8, 138.6, 134.4, 130.7, 129.1, 128.9, 127.9, 124.1, 113.7, 102.5, 90.8, 55.1, 43.9, 30.2, 26.9, 26.1, 23.6 ppm; IR (neat)  $\nu$  (cm<sup>-1</sup>) 3004, 2956, 2837, 1711, 1670, 1608, 1572, 1510, 1444, 1353, 1247, 1177, 1109, 1071, 1029; MS (70 eV): *m/z* (%): 412 (0.09) [M<sup>+</sup>], 43 (100); HRMS calcd for C<sub>24</sub>H<sub>25</sub>O<sub>4</sub>Cl (M)<sup>+</sup>: 412.1441, found: 412.1439.

**15. 1,1'-(3,4-Bis(4-methoxyphenyl)-5-phenyl-2,5-dihydrofuran-2,2-diyl)diethanon**

e (**3g**).

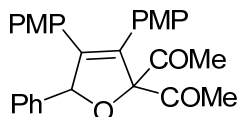

The reaction of **1a** (40.8 mg, 0.2 mmol), **2g** (96 mg, 0.4 mmol), 80 mg of 4Å MS and 5 mol % Sc(OTf)<sub>3</sub> (0.01 mmol, 4.9 mg) in DCE (2 mL) was carried out at r.t. for 3 hours to afford 61 mg (69%) of **3g**, including 9% product with double bond migration. colorless oil. <sup>1</sup>H NMR (400 MHz, CDCl<sub>3</sub>)  $\delta_H$  7.29-7.33 (m, 5 H), 7.20 (d, 2 H,  $J = 8.4$  Hz), 6.93 (d, 2 H,  $J = 8.0$  Hz), 6.78 (d, 2 H,  $J = 8.4$  Hz), 6.59 (d, 2 H,  $J = 8.4$  Hz), 6.36 (s, 1 H), 3.76 (s, 3 H), 3.65 (s, 3 H), 2.31 (s, 3 H), 2.11 (s, 3 H); <sup>13</sup>C NMR (100 MHz, CDCl<sub>3</sub>)  $\delta_C$  206.0, 205.3, 159.2, 159.1, 140.1, 138.9, 133.1, 131.5, 130.2, 128.7, 128.3, 124.7, 113.8, 113.6, 102.9, 91.2, 55.0, 55.0, 27.0, 25.8 ppm; IR (neat)  $\nu$  (cm<sup>-1</sup>) 3063, 3004, 2837, 1710, 1671, 1606, 1572, 1509, 1458, 1417, 1352, 1291, 1247, 1178, 1107, 1080, 1029; MS (70 eV):  $m/z$  (%): 442 (0.23) [M<sup>+</sup>], 43 (100); HRMS calcd for C<sub>28</sub>H<sub>26</sub>O<sub>5</sub> (M)<sup>+</sup>: 442.1780, found: 442.1783.

**16. (4-Bromo-3-(4-methoxyphenyl)-5-phenyl-2,5-dihydrofuran-2,2-diyl)bis(phenylmethanone) (3h)**

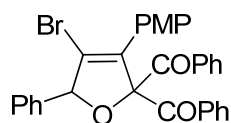

The reaction of **1b** (81.2 mg, 0.2 mmol), **2h** (84 mg, 0.4 mmol), 80 mg of 4Å MS and 5 mol % Ni(ClO<sub>4</sub>)<sub>2</sub>·6H<sub>2</sub>O (0.01 mmol, 3.6 mg) in DCE (2 mL) was carried out at r.t. for 3 hours to afford 100 mg (82%) of **3h**. <sup>1</sup>H NMR (400 MHz, CDCl<sub>3</sub>)  $\delta_H$  7.96-7.99 (m, 2 H), 7.85-7.88 (m, 2 H), 7.57 (t, 1 H,  $J = 7.6$  Hz), 7.46 (t, 2 H,  $J = 7.2$  Hz), 7.21-7.41 (m, 10 H), 6.85 (d, 2 H,  $J = 8.0$  Hz), 6.05 (s, 1 H), 3.74 (s, 3 H); <sup>13</sup>C NMR (100 MHz, CDCl<sub>3</sub>)  $\delta_C$  196.8, 195.2, 159.7, 138.7, 136.7, 135.5, 134.4, 133.4, 132.8, 131.2, 129.8, 129.2, 129.1, 128.7, 128.6, 128.4, 128.2, 123.3, 122.5, 113.6, 101.7, 91.7, 55.1 ppm; IR (neat)  $\nu$  (cm<sup>-1</sup>) 3064, 2953, 2836, 1690, 1597, 1509, 1446, 1248, 1178, 1125, 1052, 1029; MS (70 eV):  $m/z$  (%): 538 (0.40) [M<sup>+</sup>], 540 (0.43) [M<sup>+</sup>+2], 77 (100); HRMS calcd for C<sub>31</sub>H<sub>23</sub>O<sub>4</sub>Br (M)<sup>+</sup>: 538.0780, found: 538.0783.

**17. 1,1'-(3-(4-Methoxyphenyl)-5-p-tolyl-2,5-dihydrofuran-2,2-diyl)diethanone (3i)**

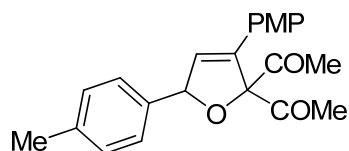

The reaction of **1c** (43.6 mg, 0.2 mmol), **2a** (55  $\mu$ L, 0.4 mmol), 80 mg of 4Å MS and 5 mol % Sc(OTf)<sub>3</sub> (0.01 mmol, 4.9 mg) in DCE (2 mL) was carried out at r.t. for 3 hours to afford 67.4 mg (97%) of **3i**, yellow solid, m.p. 43-45 °C. <sup>1</sup>H NMR (400 MHz, CDCl<sub>3</sub>)  $\delta_H$  7.37 (d, 2 H, *J* = 7.6 Hz), 7.17-7.24 (m, 4 H), 6.83 (d, 2 H, *J* = 7.2 Hz), 6.41 (s, 1 H), 6.04 (s, 1 H), 3.78 (s, 3 H), 2.35 (s, 3 H), 2.31 (s, 3 H), 2.16 (s, 3 H); <sup>13</sup>C NMR (100 MHz, CDCl<sub>3</sub>)  $\delta_C$  206.4, 205.1, 159.7, 138.9, 138.6, 136.3, 129.4, 129.0, 127.5, 127.3, 123.7, 113.7, 100.8, 88.6, 55.2, 26.6, 25.8, 21.1 ppm; IR (neat)  $\nu$  (cm<sup>-1</sup>) 3006, 2936, 2839, 1753, 1710, 1667, 1607, 1573, 1482, 1420, 1382, 1292, 1181, 1075, 1030; MS (70 eV): *m/z* (%): 350 (0.75) [M<sup>+</sup>], 43 (100); HRMS calcd for C<sub>22</sub>H<sub>22</sub>O<sub>4</sub>(M)<sup>+</sup>: 350.1518, found: 350.1516.

**18. 1,1'-(5-(4-bromophenyl))-3-(4-methoxyphenyl)-2,5-dihydrofuran-2,2-diyl)diet hanone (3j)**

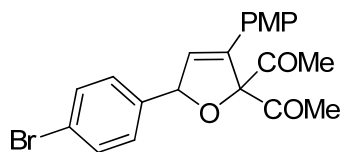

The reaction of **1d** (56.4 mg, 0.2 mmol), **2a** (55  $\mu$ L, 0.4 mmol), 80 mg of 4Å MS and 5 mol % Sc(OTf)<sub>3</sub> (0.01 mmol, 4.9 mg) in DCE (2 mL) was carried out at r.t. for 3 hours to afford 81.4 mg (98%) of **3j**, white solid, m.p. 104-106 °C. <sup>1</sup>H NMR (400 MHz, CDCl<sub>3</sub>)  $\delta_H$  7.51 (d, 2 H, *J* = 6.8 Hz), 7.36 (d, 2 H, *J* = 7.2 Hz), 7.21 (d, 2 H, *J* = 7.2 Hz), 6.83 (d, 2 H, *J* = 7.6 Hz), 6.40 (s, 1 H), 6.04 (s, 1 H), 3.78 (s, 3 H), 2.31 (s, 3 H), 2.16 (s, 3 H); <sup>13</sup>C NMR (100 MHz, CDCl<sub>3</sub>)  $\delta_C$  206.1, 204.6, 159.9, 139.4, 138.3, 131.9, 129.1, 128.9, 126.7, 123.3, 122.7, 113.7, 100.9, 87.9, 55.2, 26.6, 25.8 ppm; IR (neat)  $\nu$  (cm<sup>-1</sup>) 3397, 3083, 2945, 2844, 1727, 1706, 1605, 1571, 1511, 1489, 1417, 1352, 1223, 1184, 1072, 1026, 1010; MS (70 eV): *m/z* (%): 414 (0.29) [M<sup>+</sup>], 416 (0.27) [M<sup>+</sup>+2], 43 (100); HRMS calcd for C<sub>21</sub>H<sub>19</sub>O<sub>4</sub>Br (M)<sup>+</sup>: 414.0467, found: 414.0463.

**19. 1,1'-(5-(2-Bromophenyl))-3-(4-methoxyphenyl)-2,5-dihydrofuran-2,2-diyl)diet hanone (3k).**

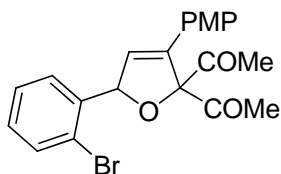

The reaction of **1e** (56.4 mg, 0.2 mmol), **2a** (55  $\mu$ L, 0.4 mmol), 80 mg of 4Å MS and 10 mol % Sc(OTf)<sub>3</sub> (0.02 mmol, 9.8 mg) in DCE (2 mL) was carried out at r.t. for 12 hours to afford 78 mg (95%) of **3k**, colorless oil. <sup>1</sup>H NMR (400 MHz, CDCl<sub>3</sub>)  $\delta_H$  7.60 (d, 1 H, *J* = 8.0 Hz), 7.29-7.38 (m, 4 H), 7.19 (t, 1 H, *J* = 7.2 Hz), 6.82 (d, 2 H, *J* = 8.4 Hz), 6.52 (s, 1 H), 6.48 (s, 1 H), 3.78 (s, 3 H), 2.36 (s, 3 H), 2.22 (s, 3 H); <sup>13</sup>C NMR (100 MHz, CDCl<sub>3</sub>)  $\delta_C$  206.4, 204.2, 159.8, 139.1, 138.3, 133.0, 129.9, 129.1, 128.1, 127.9, 126.5, 123.5, 122.6, 113.7, 101.0, 87.3, 55.2, 26.7, 25.9 ppm; IR (neat)  $\nu$  (cm<sup>-1</sup>) 3068, 3005, 2934, 2837, 1711, 1607, 1571, 1512, 1465, 1439, 1352, 1255, 1217, 1183, 1118, 1077, 1027; MS (70 eV): *m/z* (%): 414 (0.18) [M<sup>+</sup>], 416 (0.17) [M<sup>+</sup>+2], 43 (100); HRMS calcd for C<sub>21</sub>H<sub>19</sub>O<sub>4</sub>Br (M)<sup>+</sup>: 414.0467, found: 414.0466.

**20. 1,1'-(5-(3-Bromophenyl)-3-(4-methoxyphenyl)-2,5-dihydrofuran-2,2-diyl)diet  
hanone (3l)**

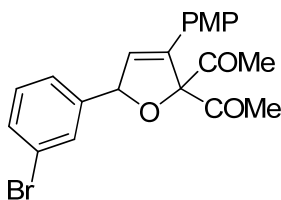

The reaction of **1f** (56.4 mg, 0.2 mmol), **2a** (55  $\mu$ L, 0.4 mmol), 80 mg of 4Å MS and 5 mol % Sc(OTf)<sub>3</sub> (0.01 mmol, 4.9 mg) in DCE (2 mL) was carried out at r.t. for 3 hours to afford 69.9 mg (85%) of **3l**, yellow oil. <sup>1</sup>H NMR (400 MHz, CDCl<sub>3</sub>)  $\delta_H$  7.47-7.50 (m, 2 H), 7.36 (d, 2 H, *J* = 7.2 Hz), 7.26 (s, 2 H), 6.83 (d, 2 H, *J* = 7.6 Hz), 6.40 (s, 1 H), 6.03 (s, 1 H), 3.78 (s, 3 H), 2.31 (s, 3 H), 2.18 (s, 3 H); <sup>13</sup>C NMR (100 MHz, CDCl<sub>3</sub>)  $\delta_C$  205.9, 204.5, 159.9, 141.6, 139.5, 131.7, 130.4, 130.3, 129.1, 126.5, 125.6, 123.3, 122.8, 113.8, 101.0, 87.8, 55.2, 26.6, 25.9 ppm; IR (neat)  $\nu$  (cm<sup>-1</sup>) 3066, 3006, 2932, 1710, 1607, 1569, 1513, 1471, 1439, 1357, 1254, 1183, 1096, 1078, 1026; MS (70 eV): *m/z* (%): 414 (0.15) [M<sup>+</sup>], 416 (0.14) [M<sup>+</sup>+2], 43 (100); HRMS calcd for C<sub>21</sub>H<sub>19</sub>O<sub>4</sub>Br (M)<sup>+</sup>: 414.0467, found: 414.0468.

**21. 1,1'-(5-(4-Fluorophenyl)-3-(4-methoxyphenyl)-2,5-dihydrofuran-2,2-diyl)diet  
hanone (3m)**

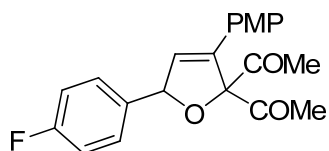

The reaction of **1a** (44.4 mg, 0.2 mmol), **2a** (55  $\mu$ L, 0.4 mmol), 80 mg of 4Å MS and 5 mol % Sc(OTf)<sub>3</sub> (0.01 mmol, 4.9 mg) in DCE (2 mL) was carried out at r.t. for 3 hours to afford 63.7 mg (90%) of **3m**, white solid, m.p. 76-78 °C. <sup>1</sup>H NMR (400 MHz, CDCl<sub>3</sub>)  $\delta_H$  7.37 (d, 2 H  $J$  = 7.6 Hz), 7.29-7.33 (m, 2 H), 7.07 (t, 2 H,  $J$  = 7.6 Hz), 6.84 (d, 2 H,  $J$  = 8.0 Hz), 6.41 (s, 1 H), 6.07 (s, 1 H), 3.80 (s, 3 H), 2.31 (s, 3 H), 2.16 (s, 3 H); <sup>13</sup>C NMR (100 MHz, CDCl<sub>3</sub>)  $\delta_C$  206.3, 204.8, 162.9 (d, <sup>1</sup> $J_{C-F}$  = 246 Hz), 159.9, 139.3, 135.2, 129.2 (d, <sup>2</sup> $J_{C-F}$  = 9 Hz), 127.0, 123.5, 115.7 (d, <sup>3</sup> $J_{C-F}$  = 21 Hz), 113.8, 100.9, 88.0, 55.2, 26.6, 25.8 ppm; IR (neat)  $\nu$  (cm<sup>-1</sup>) 2839, 1712, 1607, 1510, 1421, 1353, 1257, 1221, 1184, 1158, 1075, 1033; MS (70 eV):  $m/z$  (%): 354 (0.65) [M<sup>+</sup>], 43 (100); HRMS calcd for C<sub>21</sub>H<sub>19</sub>O<sub>4</sub>F (M)<sup>+</sup>: 354.1267, found: 354.1268.

## 22. (3-(4-Methoxyphenyl)-5-phenyl-2,5-dihydrofuran-2,2-diyl)bis(phenylmethanone) (**3n**)

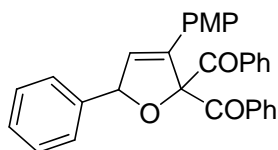

The reaction of **1b** (81.2 mg, 0.2 mmol), **2a** (55  $\mu$ L, 0.4 mmol), 80 mg of 4Å MS and 5 mol % Sc(OTf)<sub>3</sub> (0.01 mmol, 4.9 mg) in DCE (2 mL) was carried out at r.t. for 2 hours to afford 85.5 mg (93%) of **3n**, white solid, m.p. 68-70 °C. <sup>1</sup>H NMR (400 MHz, CDCl<sub>3</sub>)  $\delta_H$  8.01 (d, 2 H,  $J$  = 7.6 Hz), 7.92 (d, 2 H,  $J$  = 8.0 Hz), 7.54 (t, 1 H,  $J$  = 7.6 Hz), 7.39-7.48 (m, 5 H), 7.20-7.30 (m, 7 H), 6.80 (d, 2 H,  $J$  = 8.0 Hz), 6.53 (s, 1 H), 6.17 (s, 1 H), 3.71 (s, 3 H); <sup>13</sup>C NMR (100 MHz, CDCl<sub>3</sub>)  $\delta_C$  198.5, 196.4, 159.7, 141.4, 138.8, 135.9, 134.7, 133.0, 132.6, 130.0, 129.7, 129.2, 128.49, 128.45, 128.3, 128.0, 127.1, 124.3, 113.6, 101.6, 88.9, 55.1 ppm; IR (neat)  $\nu$  (cm<sup>-1</sup>) 3058, 3029, 2936, 2836, 1782, 1728, 1689, 1598, 1577, 1511, 1448, 1419, 1254, 1180, 1118, 1066, 1028; MS (70 eV):  $m/z$  (%): 460 (1.20) [M<sup>+</sup>], 105 (100); HRMS calcd for C<sub>31</sub>H<sub>24</sub>O<sub>4</sub> (M)<sup>+</sup>: 460.1675, found: 460.1676.

## 23. (3-(4-Methoxyphenyl)-5-(naphthalen-1-yl)-2,5-dihydrofuran-2,2-diyl)bis(phenylmethanone) (**3o**)

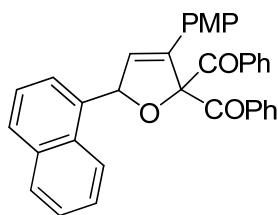

The reaction of **1h** (75.6 mg, 0.2 mmol), **2a** (55  $\mu$ L, 0.4 mmol), 80 mg of 4Å MS and 5 mol % Sc(OTf)<sub>3</sub> (0.01 mmol, 4.9 mg) in DCE (2 mL) was carried out at r.t. for 2 hours to afford 91.8 mg (90%) of **3o**, white solid, m.p. 190-192 °C. <sup>1</sup>H NMR (400 MHz, CDCl<sub>3</sub>)  $\delta_H$  8.10 (d, 2 H,  $J$  = 7.6 Hz), 8.05 (d, 1 H,  $J$  = 7.2 Hz), 7.87 (d, 2 H,  $J$  = 7.2 Hz), 7.82 (d, 1 H,  $J$  = 6.8 Hz), 7.76 (d, 1 H,  $J$  = 7.6 Hz), 7.58 (t, 1 H,  $J$  = 7.2 Hz), 7.43-7.51 (m, 7 H), 7.32-7.38 (m, 2 H), 7.18 (t, 2 H,  $J$  = 7.6 Hz), 6.87 (s, 1 H), 6.82 (d, 3 H,  $J$  = 4.8 Hz), 3.75 (s, 3 H); <sup>13</sup>C NMR (100 MHz, CDCl<sub>3</sub>)  $\delta_C$  197.7, 196.9, 159.7, 142.6, 135.7, 134.9, 134.2, 133.7, 133.0, 132.6, 130.9, 129.9, 129.7, 129.6, 128.9, 128.7, 128.4, 127.9, 127.2, 126.3, 125.7, 125.2, 124.6, 124.1, 123.3, 113.7, 101.3, 85.0, 55.2 ppm; IR (neat)  $\nu$  (cm<sup>-1</sup>) 3390, 2934, 2361, 1749, 1684, 1602, 1510, 1446, 1366, 1285, 1255, 1182, 1111, 1074, 1028; MS (70 eV):  $m/z$  (%): 510 (1.10) [M<sup>+</sup>], 105 (100); HRMS calcd for C<sub>35</sub>H<sub>26</sub>O<sub>4</sub> (M)<sup>+</sup>: 530.1831, found: 530.1823.

#### 24. (3,5-Bis(4-methoxyphenyl)-2,5-dihydrofuran-2,2-diyl)bis(phenylmethanone) (**3p**)

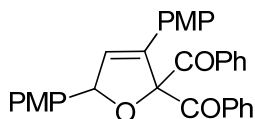

The reaction of **1i** (40.8 mg, 0.2 mmol), **2a** (55  $\mu$ L, 0.4 mmol), 80 mg of 4Å MS and 5 mol % Sc(OTf)<sub>3</sub> (0.01 mmol, 4.9 mg) in DCE (2 mL) was carried out at r.t. for 2 hours to afford 91.6 mg (94%) of **3p**, yellow oil. <sup>1</sup>H NMR (400 MHz, CDCl<sub>3</sub>)  $\delta_H$  8.01 (d, 2 H,  $J$  = 7.6 Hz), 7.91 (d, 2 H,  $J$  = 7.6 Hz), 7.55 (t, 1 H,  $J$  = 7.2 Hz), 7.39-7.48 (m, 5 H), 7.28 (t, 2 H,  $J$  = 7.2 Hz), 7.18 (d, 2 H,  $J$  = 8.0 Hz), 6.76-6.83 (m, 4 H), 6.50 (s, 1 H), 6.12 (s, 1 H), 3.74 (s, 3 H), 3.71 (s, 3 H); <sup>13</sup>C NMR (100 MHz, CDCl<sub>3</sub>)  $\delta_C$  198.6, 196.6, 159.7, 141.4, 136.0, 134.8, 133.0, 132.6, 130.9, 130.0, 129.8, 129.2, 128.8, 128.5, 128.0, 124.4, 113.9, 113.6, 101.4, 88.7, 55.2, 55.1 ppm; IR (neat)  $\nu$  (cm<sup>-1</sup>) 3067, 3003, 2933, 2836, 1771, 1688, 1607, 1510, 1446, 1249, 1176, 1116, 1065, 1029; MS (70 eV):  $m/z$  (%): 490 (1.40) [M<sup>+</sup>], 105 (100); HRMS calcd for C<sub>32</sub>H<sub>26</sub>O<sub>5</sub> (M)<sup>+</sup>: 490.1780, found: 490.1783.

**25. (5-(4-Bromophenyl)-3-(4-methoxyphenyl)-2,5-dihydrofuran-2,2-diyl)bis(phenylmethanone) (3q)**

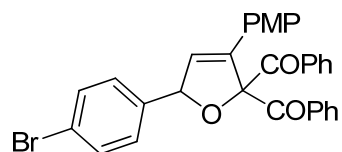

The reaction of **1j** (40.8 mg, 0.2 mmol), **2a** (55  $\mu$ L, 0.4 mmol), 80 mg of 4Å MS and 5 mol % Sc(OTf)<sub>3</sub> (0.01 mmol, 4.9 mg) in DCE (2 mL) was carried out at r.t. for 2 hours to afford 101 mg (94%) of **3q**, white solid, m.p. 72-74 °C. <sup>1</sup>H NMR (400 MHz, CDCl<sub>3</sub>)  $\delta_H$  7.99 (d, 2 H,  $J = 7.6$  Hz), 7.88 (d, 2 H,  $J = 7.6$  Hz), 7.56 (t, 1 H,  $J = 7.2$  Hz), 7.42-7.47 (m, 5 H), 7.36 (d, 2 H,  $J = 7.6$  Hz), 7.30 (t, 2 H,  $J = 7.6$  Hz), 7.10 (d, 2 H,  $J = 8.0$  Hz), 6.81 (d, 2 H,  $J = 8.0$  Hz), 6.49 (s, 1 H), 6.12 (s, 1 H), 3.74 (s, 3 H); <sup>13</sup>C NMR (100 MHz, CDCl<sub>3</sub>)  $\delta_C$  198.3, 196.4, 159.8, 141.9, 137.9, 135.9, 134.6, 133.1, 132.8, 131.7, 129.9, 129.8, 129.1, 128.8, 128.5, 128.1, 127.5, 124.1, 122.4, 113.7, 101.5, 88.2, 55.2 ppm; IR (neat)  $\nu$  (cm<sup>-1</sup>) 3063, 2958, 2837, 1781, 1689, 1598, 1511, 1488, 1447, 1409, 1253, 1180, 1117, 1067, 1028, 1010; MS (70 eV):  $m/z$  (%): 538 (0.07) [M<sup>+</sup>], 540 (0.09) [M<sup>+</sup>+2], 105 (100); HRMS calcd for C<sub>31</sub>H<sub>23</sub>O<sub>4</sub>Br (M)<sup>+</sup>: 538.0780, found: 538.0778.

**26. Ethyl 2-acetyl-3-(4-methoxyphenyl)-5-phenyl-2,5-dihydrofuran-2-carboxylate (3r)**

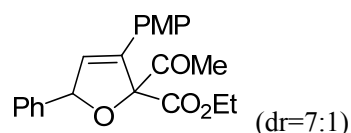

The reaction of **1k** (46.8 mg, 0.2 mmol), **2a** (55  $\mu$ L, 0.4 mmol), 80 mg of 4Å MS and 5 mol % Sc(OTf)<sub>3</sub> (0.01 mmol, 4.9 mg) in DCE (2 mL) was carried out at r.t. for 4 hours to afford 68 mg (93%) of **3r** (dr=7:1), colorless oil. <sup>1</sup>H NMR (400 MHz, CDCl<sub>3</sub>)  $\delta_H$  7.44 (d, 2 H,  $J = 7.6$  Hz), 7.30-7.40 (m, 5 H), 6.84 (d, 2 H,  $J = 7.2$  Hz), 6.40 (s, 1 H), 6.11 (s, 1 H), 4.26 (q, 2 H,  $J_1 = 7.2$  Hz,  $J_2 = 7.2$  Hz), 3.79 (s, 3 H), 2.25 (s, 3 H), 1.24 (t, 3 H,  $J = 6.8$  Hz); <sup>13</sup>C NMR (100 MHz, CDCl<sub>3</sub>)  $\delta_C$  203.0, 169.3, 159.7, 139.2, 129.2, 129.1, 128.6, 128.44, 128.38, 127.2, 123.9, 113.6, 96.9, 88.5, 61.9, 55.2, 26.1, 13.9 ppm; IR (neat)  $\nu$  (cm<sup>-1</sup>) 3064, 3033, 2936, 2838, 1721, 1608, 1576, 1541, 1454, 1420, 1353, 1253, 1182, 1097, 1030; MS (70 eV):  $m/z$  (%): 366 (0.61) [M<sup>+</sup>], 43 (100); HRMS calcd for C<sub>22</sub>H<sub>22</sub>O<sub>5</sub> (M)<sup>+</sup>: 366.1467, found: 366.1470.

## 27. Ethyl 2-benzoyl-3-(4-methoxyphenyl)-5-phenyl-2,5-dihydrofuran-2-carboxylate (3s)

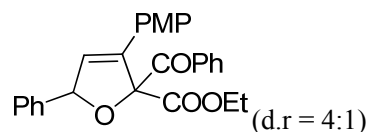

The reaction of **11** (59.2 mg, 0.2 mmol), **2a** (55  $\mu$ L, 0.4 mmol), 80 mg of 4Å MS and 5 mol % Sc(OTf)<sub>3</sub> (0.01 mmol, 4.9 mg) in DCE (2 mL) was carried out at r.t. for 4 hours to afford 72.7 mg (85%) of **3s** (d r = 4:1), Major isomer: yellow solid, m.p. 58-60 °C. <sup>1</sup>H NMR (400 MHz, CDCl<sub>3</sub>)  $\delta_H$  8.04 (d, 2 H,  $J = 8.0$  Hz), 7.50 (t, 3 H,  $J = 8.4$  Hz), 7.37 (t, 2 H,  $J = 7.6$  Hz), 7.19-7.24 (m, 5 H), 6.84 (d, 2 H,  $J = 8.4$  Hz), 6.38 (s, 1 H), 6.26 (s, 1 H), 4.10 (q, 2 H,  $J_1 = 6.8$  Hz,  $J_2 = 6.0$  Hz), 3.78 (s, 3 H), 0.99 (t, 3 H,  $J = 7.6$  Hz); <sup>13</sup>C NMR (100 MHz, CDCl<sub>3</sub>)  $\delta_C$  193.4, 170.3, 159.6, 139.5, 138.8, 134.9, 132.9, 129.8, 129.6, 129.5, 128.5, 128.2, 127.0, 124.4, 113.4, 96.3, 89.6, 61.8, 55.2, 13.7 ppm; IR (neat)  $\nu$  (cm<sup>-1</sup>) 3063, 2981, 2935, 2838, 1748, 1728, 1690, 1606, 1512, 1450, 1367, 1254, 1224, 1183, 1118, 1075, 1029, 1002; MS (70 eV):  $m/z$  (%): 428 (1.99) [M<sup>+</sup>], 77 (100);

Minor isomer: white solid, m.p. 145-147 °C. HRMS calcd for C<sub>27</sub>H<sub>24</sub>O<sub>5</sub> (M)<sup>+</sup>: 428.1624, found: 428.1619. <sup>1</sup>H NMR (400 MHz, CDCl<sub>3</sub>)  $\delta_H$  8.08 (d, 2 H,  $J = 7.6$  Hz), 7.61 (d, 2 H,  $J = 7.6$  Hz), 7.53 (t, 1 H,  $J = 7.6$  Hz), 7.40-7.46 (m, 6 H), 7.33-7.38 (m, 1 H), 6.84 (d, 2 H,  $J = 8.0$  Hz), 6.30 (s, 1 H), 5.97 (s, 1 H), 4.08 (q, 2 H,  $J_1 = 7.2$  Hz,  $J_2 = 7.2$  Hz), 3.80 (s, 3 H), 0.98 (t, 3 H,  $J = 7.2$  Hz); <sup>13</sup>C NMR (100 MHz, CDCl<sub>3</sub>)  $\delta_C$  194.1, 169.6, 159.7, 139.9, 139.5, 135.1, 133.0, 130.0, 129.8, 129.5, 128.6, 128.5, 128.3, 127.5, 124.5, 113.4, 97.0, 88.8, 61.8, 55.2, 13.6 ppm; IR (neat)  $\nu$  (cm<sup>-1</sup>) 3057, 3028, 2873, 1749, 1682, 1602, 1509, 1447, 1418, 1391, 1366, 1284, 1255, 1225, 1111, 1074, 1029; MS (70 eV):  $m/z$  (%): 428 (1.89) [M<sup>+</sup>], 105 (100); HRMS calcd for C<sub>27</sub>H<sub>24</sub>O<sub>5</sub> (M)<sup>+</sup>: 428.1624, found: 428.1629.

## 28. Dimethyl 3-(4-methoxyphenyl)-5-phenylfuran-2,2(5H)-dicarboxylate (3t)

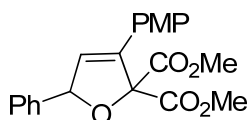

The reaction of **1m** (47.2 mg, 0.2 mmol), **2a** (55  $\mu$ L, 0.4 mmol), 80 mg of 4Å MS and 5 mol % Sc(OTf)<sub>3</sub> (0.01 mmol, 4.9 mg) in DCE (2 mL) was carried out at r.t. for 2 hours to afford 39 mg (53%) of **3t**, white solid, m.p. 100-102 °C. <sup>1</sup>H NMR (400 MHz, CDCl<sub>3</sub>)  $\delta_H$  7.42-7.44 (m, 4 H), 7.31-7.39 (m, 3 H), 6.85 (d, 2 H,  $J = 7.8$  Hz),



6.31 (s, 1 H), 6.10 (s, 1 H), 3.80 (s, 6 H), 3.78 (s, 3 H);  $^{13}\text{C}$  NMR (100 MHz,  $\text{CDCl}_3$ )  $\delta_{\text{C}}$  169.0, 168.4, 159.7, 139.3, 137.9, 129.6, 129.1, 128.5, 127.2, 123.7, 113.6, 93.4, 89.0, 55.2, 52.9 ppm; IR (neat)  $\nu$  ( $\text{cm}^{-1}$ ) 3081, 3037, 3011, 2988, 2962, 2842, 2565, 1744, 1730, 1605, 1511, 1361, 1259, 1105, 1053, 1024; MS (70 eV):  $m/z$  (%): 368 (3.55) [ $\text{M}^+$ ], 105 (100); HRMS calcd for  $\text{C}_{21}\text{H}_{20}\text{O}_6(\text{M})^+$ : 368.1260, found: 368.1272.

**29. Dimethyl 3-phenyl-2H-furo[3,2-c]chromene-2,2(4H,9bH)-dicarboxylate (7).**

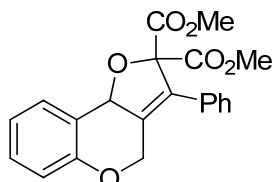

The reaction of **5** (73.2 mg, 0.2 mmol), 80 mg of 4Å MS and 5 mol %  $\text{Sc}(\text{OTf})_3$  (0.01 mmol, 4.9 mg) in DCE (2 mL) was carried out at r.t. for 12 hours to afford 31.5 mg (43%) of **7**, white solid, m.p. 55-57 °C.  $^1\text{H}$  NMR (400 MHz,  $\text{CDCl}_3$ )  $\delta_{\text{H}}$  7.48 (d, 1 H,  $J = 7.2$  Hz), 7.36 (s, 3 H), 7.21-7.23 (m, 3 H), 6.99-7.03 (m, 1 H), 6.85 (d, 1 H,  $J = 8.0$  Hz), 6.13 (s, 1 H), 4.87 (d, 1 H,  $J = 13.2$  Hz), 4.80 (d, 1 H,  $J = 13.2$  Hz), 3.80 (s, 3 H), 3.64 (s, 3 H);  $^{13}\text{C}$  NMR (100 MHz,  $\text{CDCl}_3$ )  $\delta_{\text{C}}$  168.3, 167.3, 152.7, 136.2, 132.5, 131.0, 129.13, 129.06, 128.6, 128.3, 126.4, 124.8, 121.5, 116.7, 96.3, 81.6, 62.8, 52.9, 52.8 ppm; IR (neat)  $\nu$  ( $\text{cm}^{-1}$ ) 2954, 1739, 1609, 1580, 1484, 1461, 1435, 1258, 1220, 1198, 1129, 1111, 1075, 1036; MS (70 eV):  $m/z$  (%): 366 (4.01) [ $\text{M}^+$ ], 115 (100); HRMS calcd for  $\text{C}_{21}\text{H}_{18}\text{O}_6(\text{M})^+$ : 366.1103, found: 366.1105.

**30. Dimethyl 3-(4-methoxyphenyl)-2H-furo[3,2-c]chromene-2,2(4H,9bH)-dicarboxylate (8).**

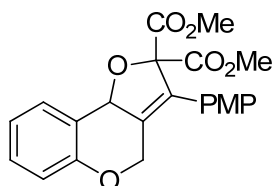

The reaction of **6** (79.2 mg, 0.2 mmol), 80 mg of 4Å MS and 5 mol %  $\text{Sc}(\text{OTf})_3$  (0.01 mmol, 4.9 mg) in DCM (2 mL) was carried out at r.t. for 12 hours to afford 60 mg (76%) of **7**, white solid, m.p. 69-71 °C.  $^1\text{H}$  NMR (400 MHz,  $\text{CDCl}_3$ )  $\delta_{\text{H}}$  7.47 (d, 1 H,  $J = 7.6$  Hz), 7.14-7.22 (m, 3 H), 7.00 (d, 1 H,  $J = 7.2$  Hz), 6.83-6.90 (m, 3 H), 6.10 (s, 1 H), 4.88 (d, 1 H,  $J = 13.2$  Hz), 4.82 (d, 1 H,  $J = 13.2$  Hz), 3.82 (s, 3 H), 3.80 (s, 3 H), 3.65 (s, 3 H);  $^{13}\text{C}$  NMR (100 MHz,  $\text{CDCl}_3$ )  $\delta_{\text{C}}$  168.5, 167.5, 159.8, 152.8, 135.2,

132.2, 130.8, 130.5, 129.1, 126.4, 125.0, 123.2, 121.5, 116.7, 113.8, 96.2, 81.5, 63.0, 55.2, 52.9 ppm; IR (neat)  $\nu$  ( $\text{cm}^{-1}$ ) 2954, 1740, 1608, 1579, 1512, 1484, 1459, 1249, 1221, 1181, 1153, 1130, 1110, 1074, 1033; MS (70 eV):  $m/z$  (%): 396 (23.15) [ $\text{M}^+$ ], 249 (100); HRMS calcd for  $\text{C}_{22}\text{H}_{20}\text{O}_7$  ( $\text{M}$ ) $^+$ : 396.1209, found: 396.1211.

### 31. 1,1'-(3-(4-Methoxyphenyl)-5-phenyltetrahydrofuran-2,2-diyl)diethanone (**9**)

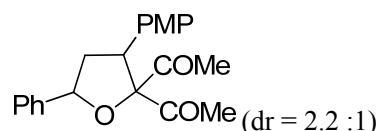

The reaction of **3a** (50.4 mg, 0.15 mmol), Pd/C(2.4 mg) in EtOAc (3 mL) was carried out in the presence of  $\text{H}_2$  (balloon) at r.t. for 12 hours to afford 48 mg (95%) of **9** (dr = 2.2 :1), colorless oil. The major isomer:  $^1\text{H}$  NMR (400 MHz,  $\text{CDCl}_3$ )  $\delta_{\text{H}}$  7.30-7.40 (m, 5 H), 7.22 (d, 2 H,  $J = 8.0$  Hz), 6.86 (d, 2 H,  $J = 8.0$  Hz), 5.71 (t, 1 H,  $J = 7.2$  Hz), 4.40-4.50 (m, 1 H), 3.79 (s, 3 H), 2.55-2.61 (m, 1 H), 2.30-2.40 (m, 1 H), 2.37 (s, 3 H), 1.79 (s, 3 H).

The minor isomer:  $^1\text{H}$  NMR (400 MHz,  $\text{CDCl}_3$ )  $\delta_{\text{H}}$  7.57 (d, 2 H,  $J = 7.2$  Hz), 7.44 (t, 2 H,  $J = 7.2$  Hz), 7.30-7.40 (m, 1 H), 7.17 (d, 2 H,  $J = 8.0$  Hz), 6.80 (d, 2 H,  $J = 8.0$  Hz), 4.92-4.97 (m, 1 H), 4.40-4.50 (m, 1 H), 3.76 (s, 3 H), 2.65-2.75 (m, 1 H), 2.30-2.40 (m, 1 H), 2.40 (s, 3 H), 1.91 (s, 3 H).

$^{13}\text{C}$  NMR (100 MHz,  $\text{CDCl}_3$ )  $\delta_{\text{C}}$  206.2, 204.1, 158.7, 141.1, 140.0, 130.7, 129.6, 129.5, 128.62, 128.55, 128.1, 127.9, 126.0, 125.9, 114.1, 113.8, 101.6, 98.9, 83.3, 81.2, 55.2, 55.1, 47.9, 47.8, 41.3, 40.6, 28.0, 27.1, 26.2, 26.1 ppm; IR (neat)  $\nu$  ( $\text{cm}^{-1}$ ) 2956, 2933, 2833, 1727, 1708, 1610, 1582, 1513, 1457, 1420, 1353, 1291, 1249, 1181, 1115, 1068, 1031; MS (70 eV):  $m/z$  (%): 338 (0.79) [ $\text{M}^+$ ], 43 (100); HRMS calcd for  $\text{C}_{21}\text{H}_{22}\text{O}_4$  ( $\text{M}$ ) $^+$ : 338.1518, found: 338.1513.

### 32. 1-(3-(4-Methoxyphenyl)-5-phenylfuran-2-yl)ethanone (**10**)

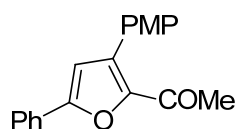

Method A: The reaction of **3a** (50.4 mg, 0.15 mmol), DDQ (1.5eq., 51 mg) in THF (1.5 mL) was carried out at r.t. for 20 hours to afford 37.2 mg (85%) of **10**. Method B: The reaction of **3a** (50.4 mg, 0.15 mmol),  $\text{Cs}_2\text{CO}_3$  (1.0eq., 49 mg) in  $\text{CH}_3\text{OH}$  (3 mL) was refluxed for 12 hours to afford 36.8 mg (84%) of **10**. white solid, m.p. 115-117  $^\circ\text{C}$ .  $^1\text{H}$  NMR (400 MHz,  $\text{CDCl}_3$ )  $\delta_{\text{H}}$  7.81 (d, 2 H,  $J = 7.2$  Hz), 7.69 (d, 2

H,  $J = 7.6$  Hz), 7.46 (t, 2 H,  $J = 7.2$  Hz), 7.40 (t, 1 H,  $J = 7.2$  Hz), 6.96 (d, 2 H,  $J = 7.6$  Hz), 6.89 (s, 1 H), 3.85 (s, 3 H), 2.56 (s, 3 H);  $^{13}\text{C}$  NMR (100 MHz,  $\text{CDCl}_3$ )  $\delta_{\text{C}}$  187.6, 159.9, 155.3, 146.0, 135.4, 130.6, 129.3, 128.9, 124.8, 124.1, 113.6, 109.8, 55.3, 27.6 ppm; IR (neat)  $\nu$  ( $\text{cm}^{-1}$ ) 2921, 2849, 1752, 1664, 1610, 1575, 1532, 1502, 1451, 1420, 1387, 1353, 1294, 1256, 1211, 1183, 1153, 1071, 1025; MS (70 eV):  $m/z$  (%): 292 (4.82) [ $\text{M}^+$ ], 43 (100); HRMS calcd for  $\text{C}_{19}\text{H}_{16}\text{O}_3(\text{M})^+$ : 292.1099, found: 292.1101.

### 33. 1-(3-(4-Methoxyphenyl)-5-phenyl-4,5-dihydrofuran-2-yl)ethanone (11)

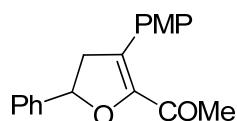

The reaction of **3a** (50.4 mg, 0.15 mmol), KOH (1.0 eq, 8.4mg) in  $\text{CH}_3\text{OH}$  (3 mL) was carried out at r.t. for 13 hours to afford 40 mg (90%) of **11**, colorless oil.  $^1\text{H}$  NMR (400 MHz,  $\text{CDCl}_3$ )  $\delta_{\text{H}}$  7.54 (d, 2 H,  $J = 7.6$  Hz), 7.39-7.50 (m, 4 H), 7.35 (d, 1 H,  $J = 6.0$  Hz), 6.89 (d, 2 H,  $J = 7.2$  Hz), 5.64 (t, 1 H,  $J = 9.6$  Hz), 3.82 (s, 3 H), 3.54-3.62 (m, 1 H), 3.19-3.26 (m, 1 H), 2.34 (s, 3 H);  $^{13}\text{C}$  NMR (100 MHz,  $\text{CDCl}_3$ )  $\delta_{\text{C}}$  192.5, 159.4, 146.6, 141.9, 129.8, 128.6, 128.0, 125.6, 125.2, 122.7, 113.4, 80.1, 55.2, 44.9, 29.1 ppm; IR (neat)  $\nu$  ( $\text{cm}^{-1}$ ) 2960, 2934, 2838, 1720, 1688, 1604, 1511, 1455, 1420, 1356, 1295, 1253, 1221, 1179, 1133, 1111, 1028; MS (70 eV):  $m/z$  (%): 294 (0.73) [ $\text{M}^+$ ], 43 (100); HRMS calcd for  $\text{C}_{19}\text{H}_{18}\text{O}_3(\text{M})^+$ : 294.1256, found: 294.1248.

### 34. 3-(4-Methoxyphenyl)-5-phenylfuran-2(5H)-one (12)

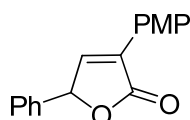

The reaction of **3a** (67.2 mg, 0.2 mmol), *m*-CPBA (0.6 mmol, 122 mg),  $\text{NaHCO}_3$  (0.6 mmol, 52 mg) in DCM (2 mL) was carried out at r.t. for 8 hours to afford 23 mg (38%) of **12**, (PE:DCM:Et<sub>2</sub>O = 3:2:0.1), white solid, m.p. 85-87 °C.  $^1\text{H}$  NMR (400 MHz,  $\text{CDCl}_3$ )  $\delta_{\text{H}}$  7.87 (d, 2 H,  $J = 8.4$  Hz), 7.50 (s, 1 H), 7.33-7.39 (m, 3 H), 7.32 (d, 2 H,  $J = 5.2$  Hz), 6.94 (d, 2 H,  $J = 8.4$  Hz), 6.00 (s, 1 H), 3.84 (s, 3 H);  $^{13}\text{C}$  NMR (100 MHz,  $\text{CDCl}_3$ )  $\delta_{\text{C}}$  172.0, 160.5, 145.0, 135.1, 130.2, 129.2, 129.0, 128.5, 126.6, 121.8, 114.1, 81.5, 55.3 ppm; IR (neat)  $\nu$  ( $\text{cm}^{-1}$ ) 3095, 2953, 2833, 1737, 1608, 1574, 1511, 1438, 1333, 1308, 1267, 1236, 1182, 1127, 1058, 1039; MS (70 eV):  $m/z$  (%): 266 (3.64) [ $\text{M}^+$ ], 43 (100); HRMS calcd for  $\text{C}_{17}\text{H}_{14}\text{O}_3(\text{M})^+$ : 266.0493, found: 266.0491.

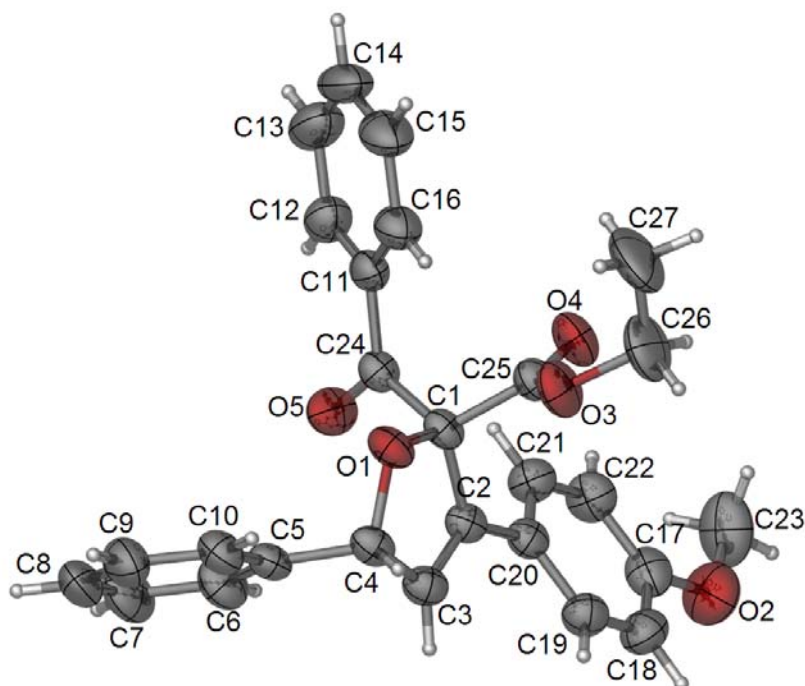

**SI- Fig. 1.** X-ray structure of the major product of **3s**.

References:

1. V.K. Yadav, K. K. Kapoor, *Tetrahedron* **1995**, *51*, 8573.
2. Z. Chen, L. Wei, J. Zhang, *Org. Lett.* **2011**, *13*, 1170.
3. B.-F. Sun, R. Hong, Y.-B. Kang, L.Deng, *J. Am. Chem. Soc* **2009**, *131*, 10384.
4. M. Ochiai, A. Nakanishi, T. Suefuji, *Org. Lett.* **2000**, *2*, 2923.

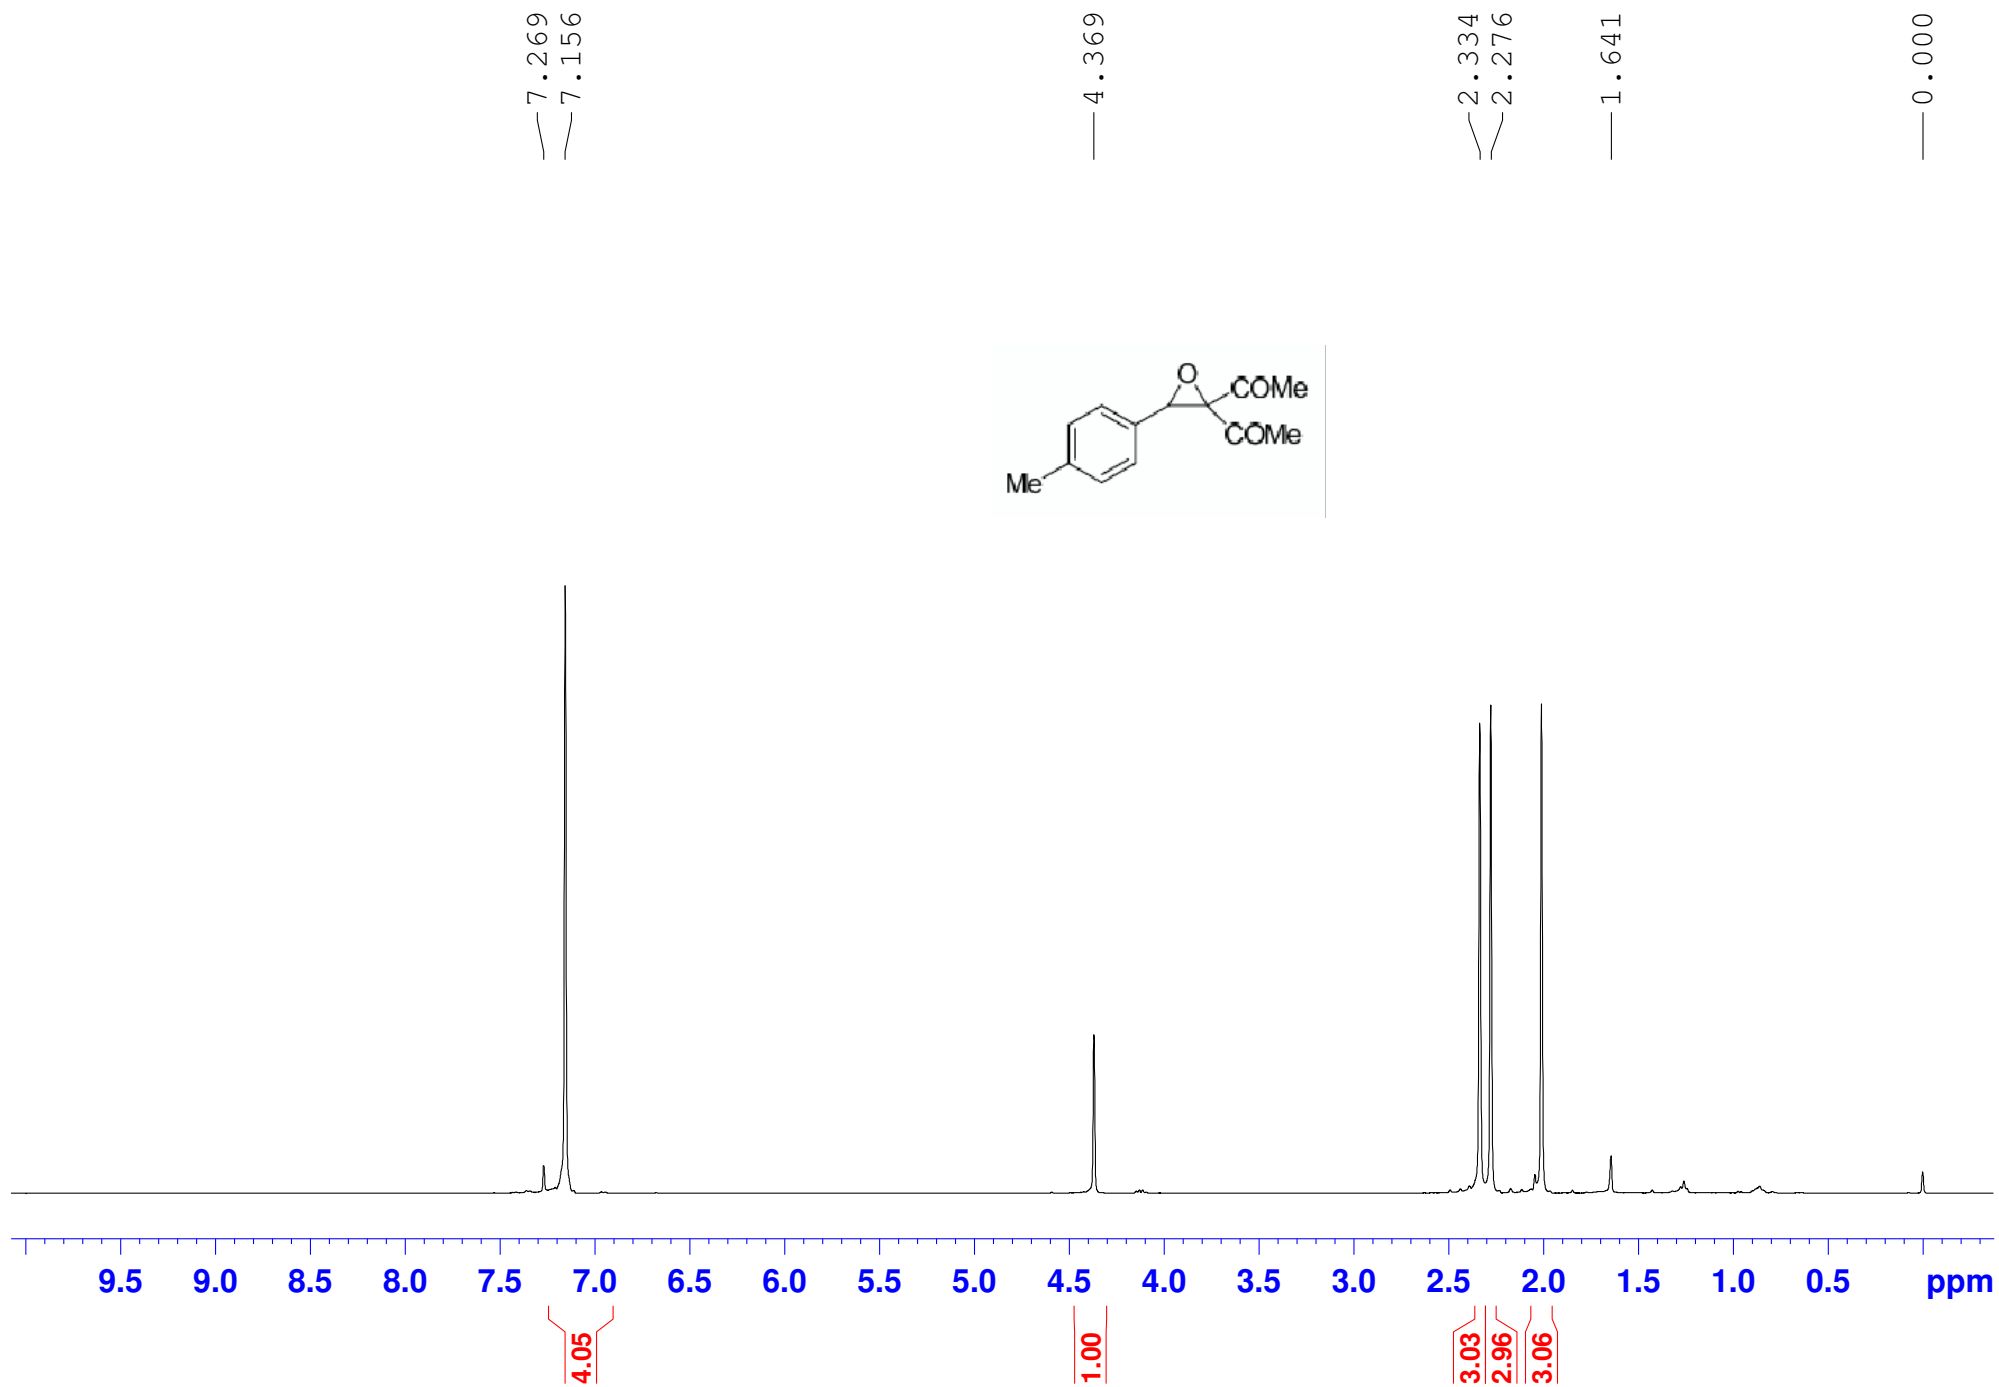

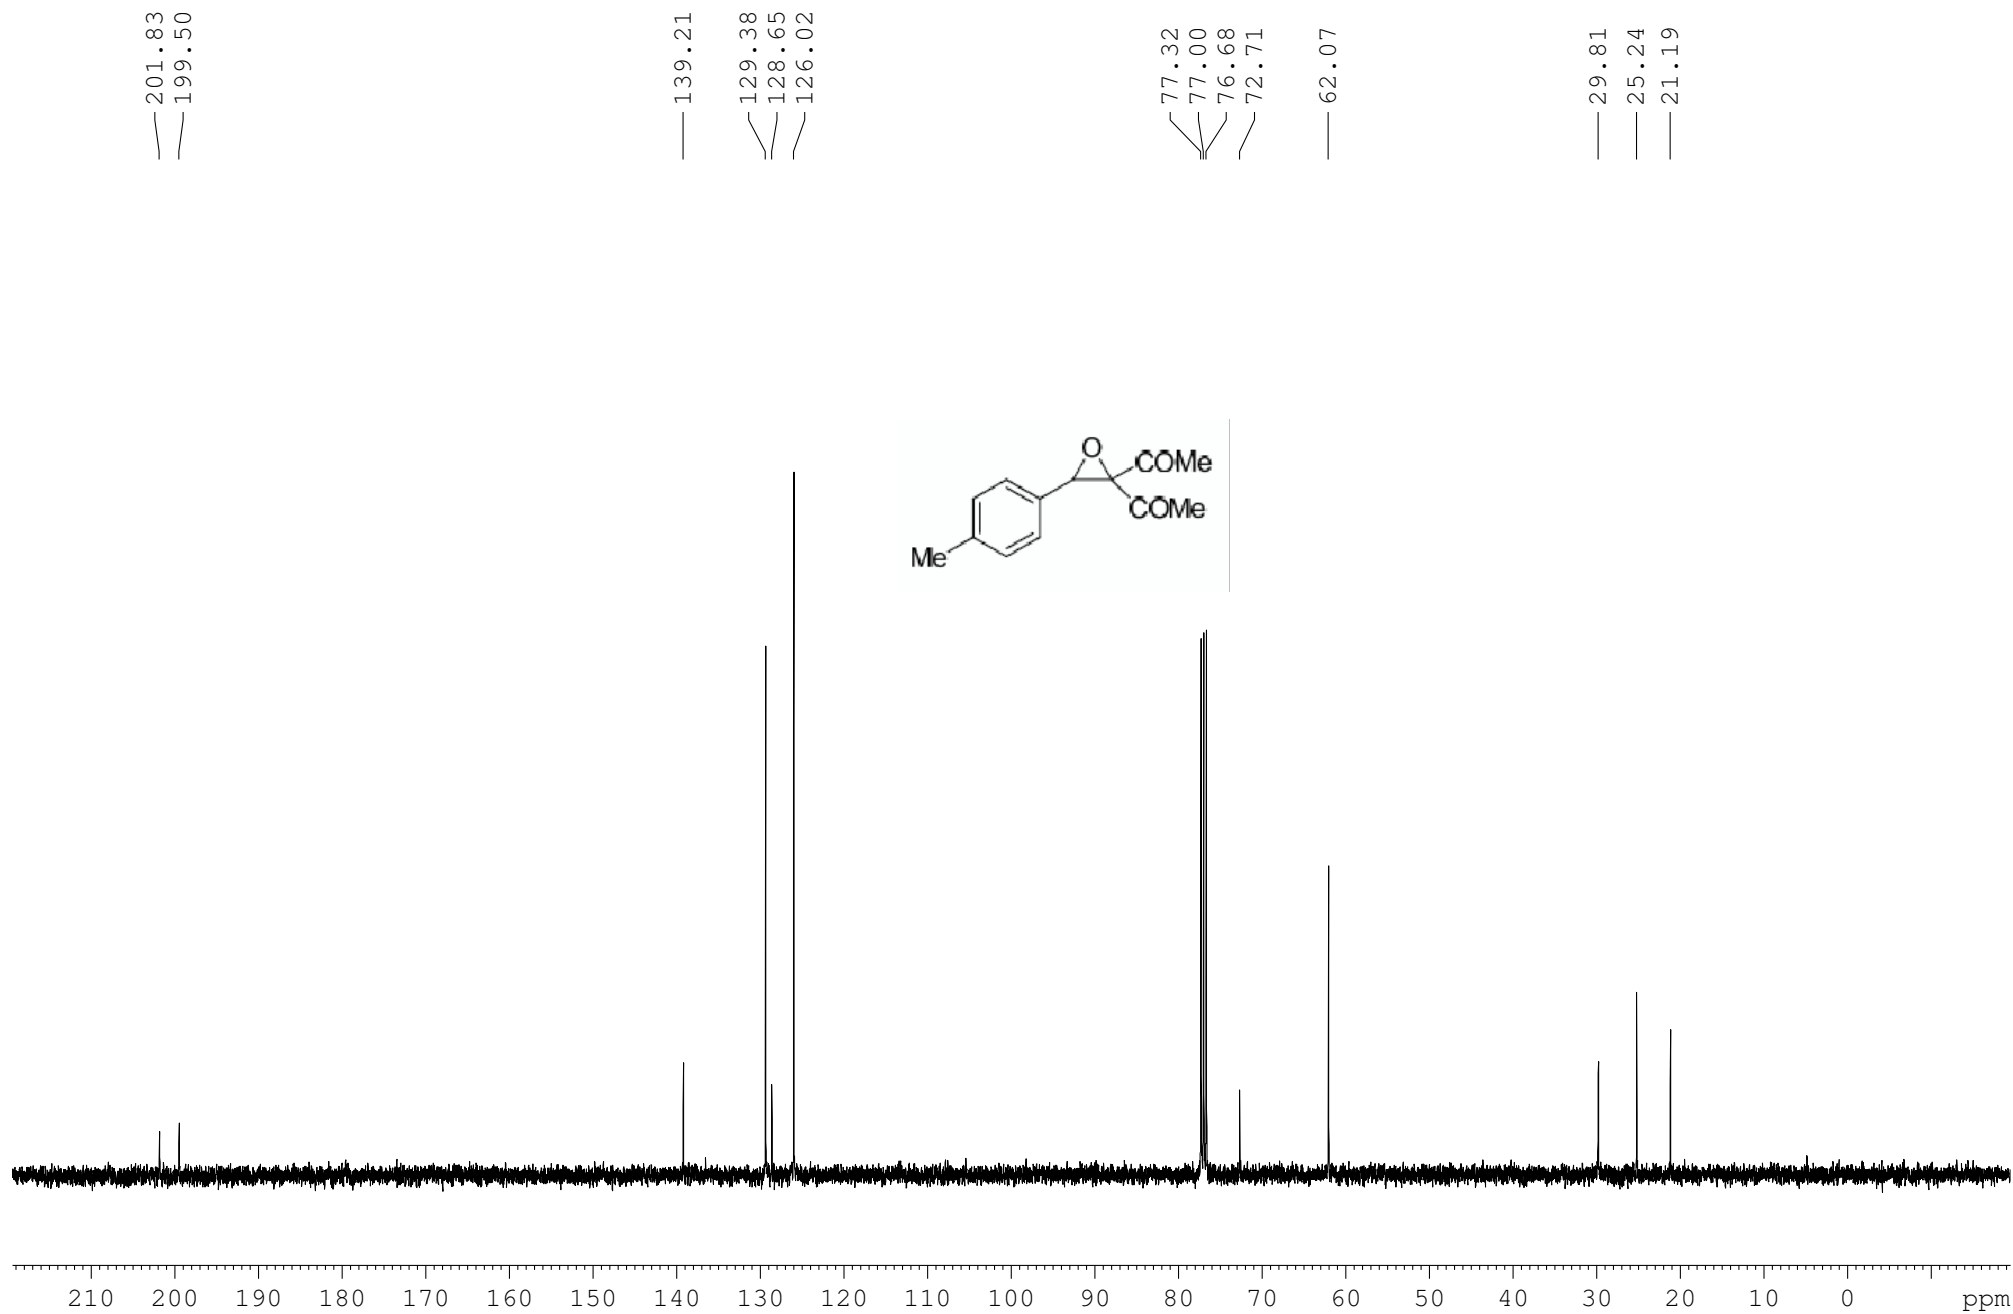

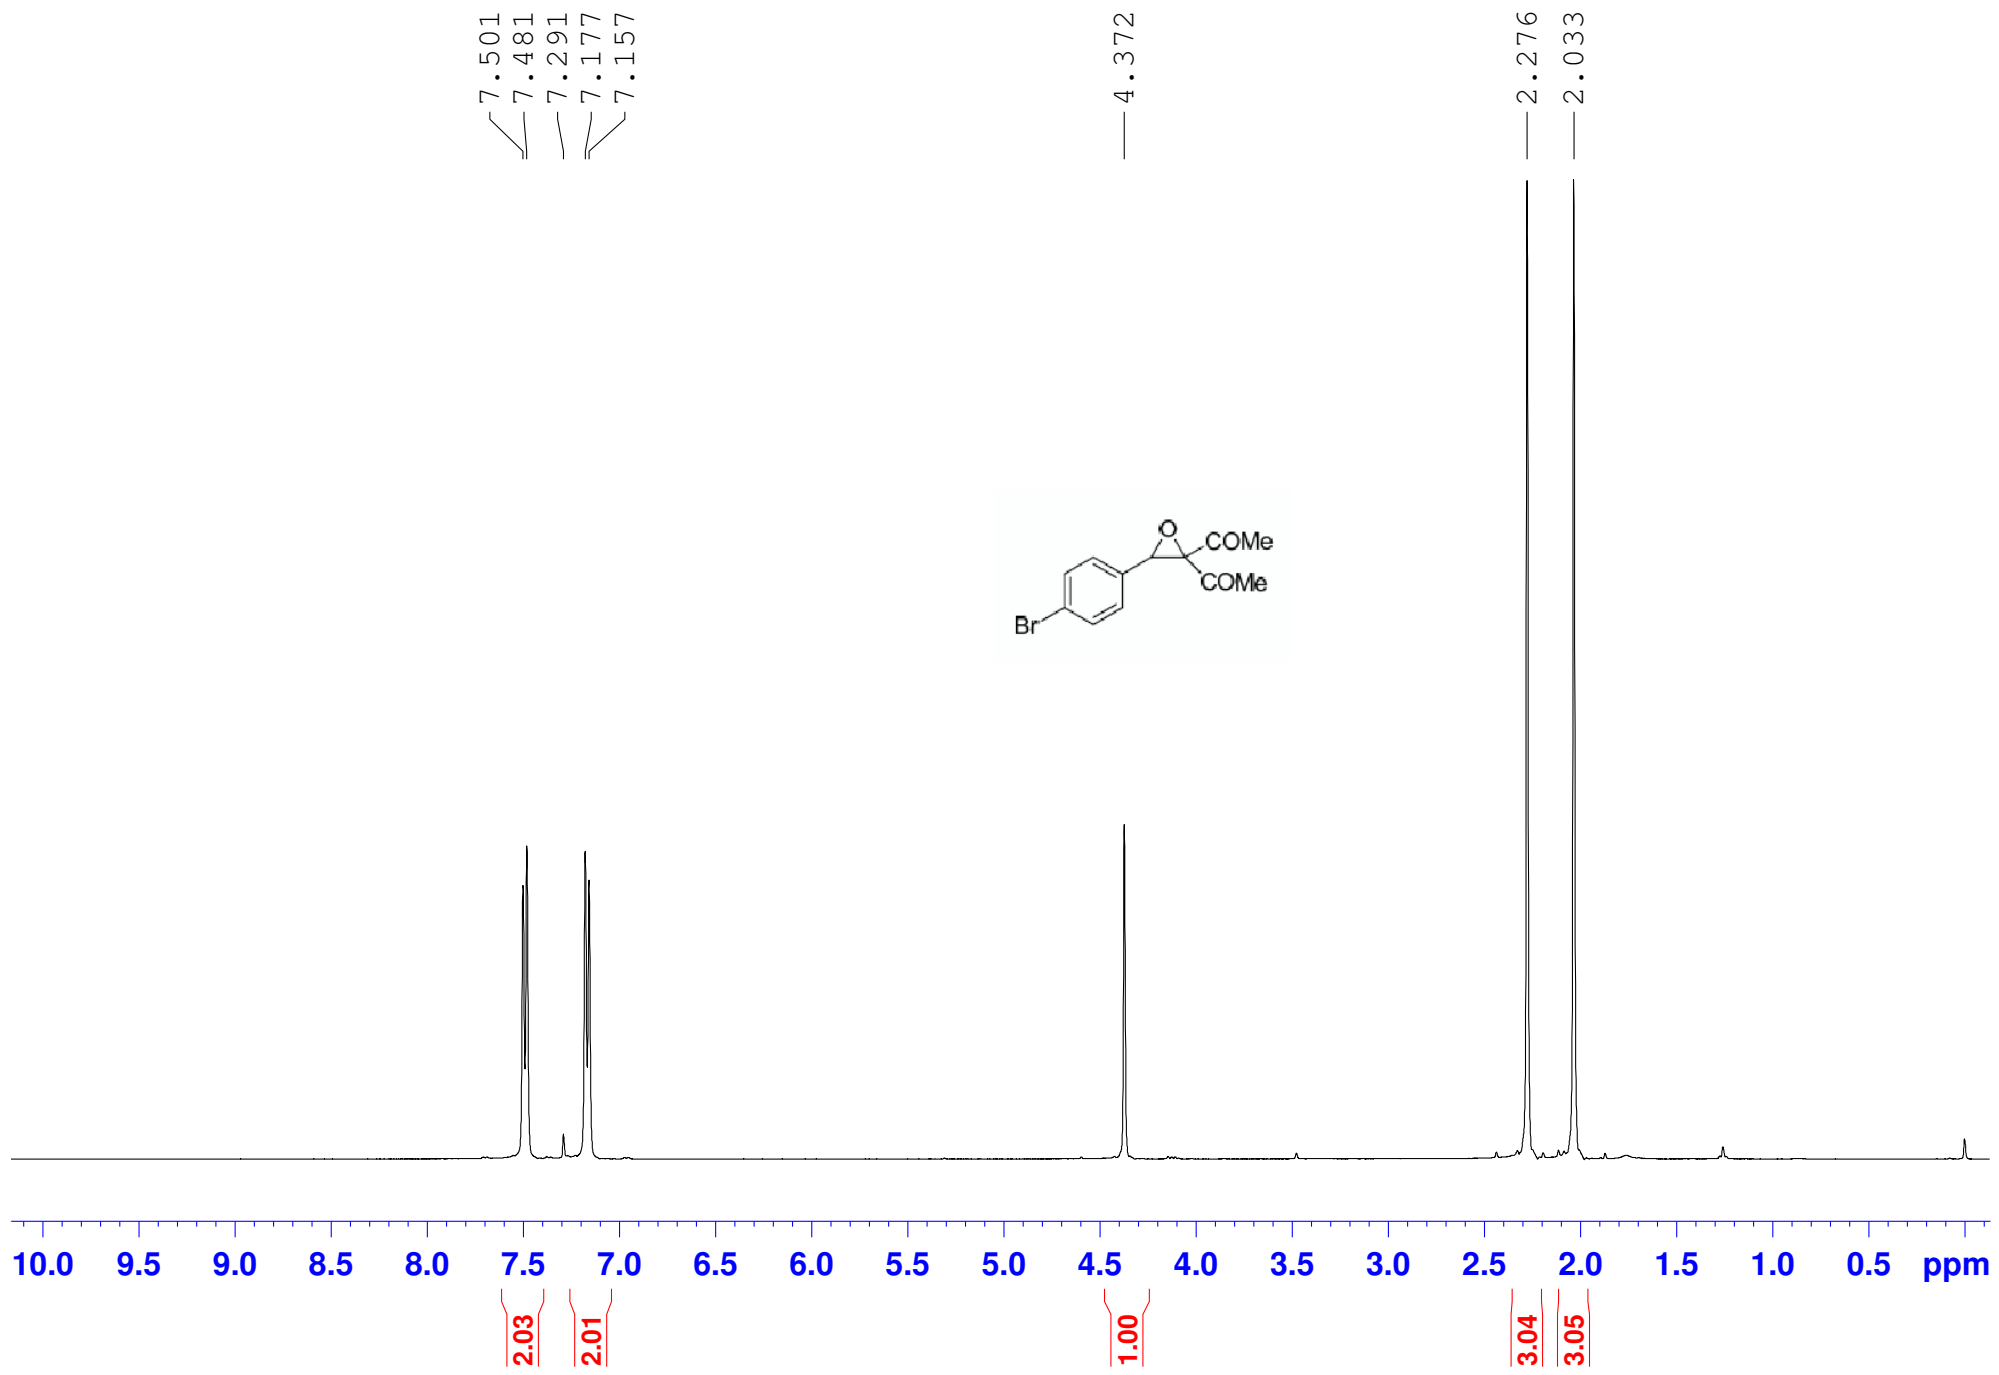

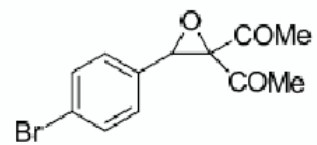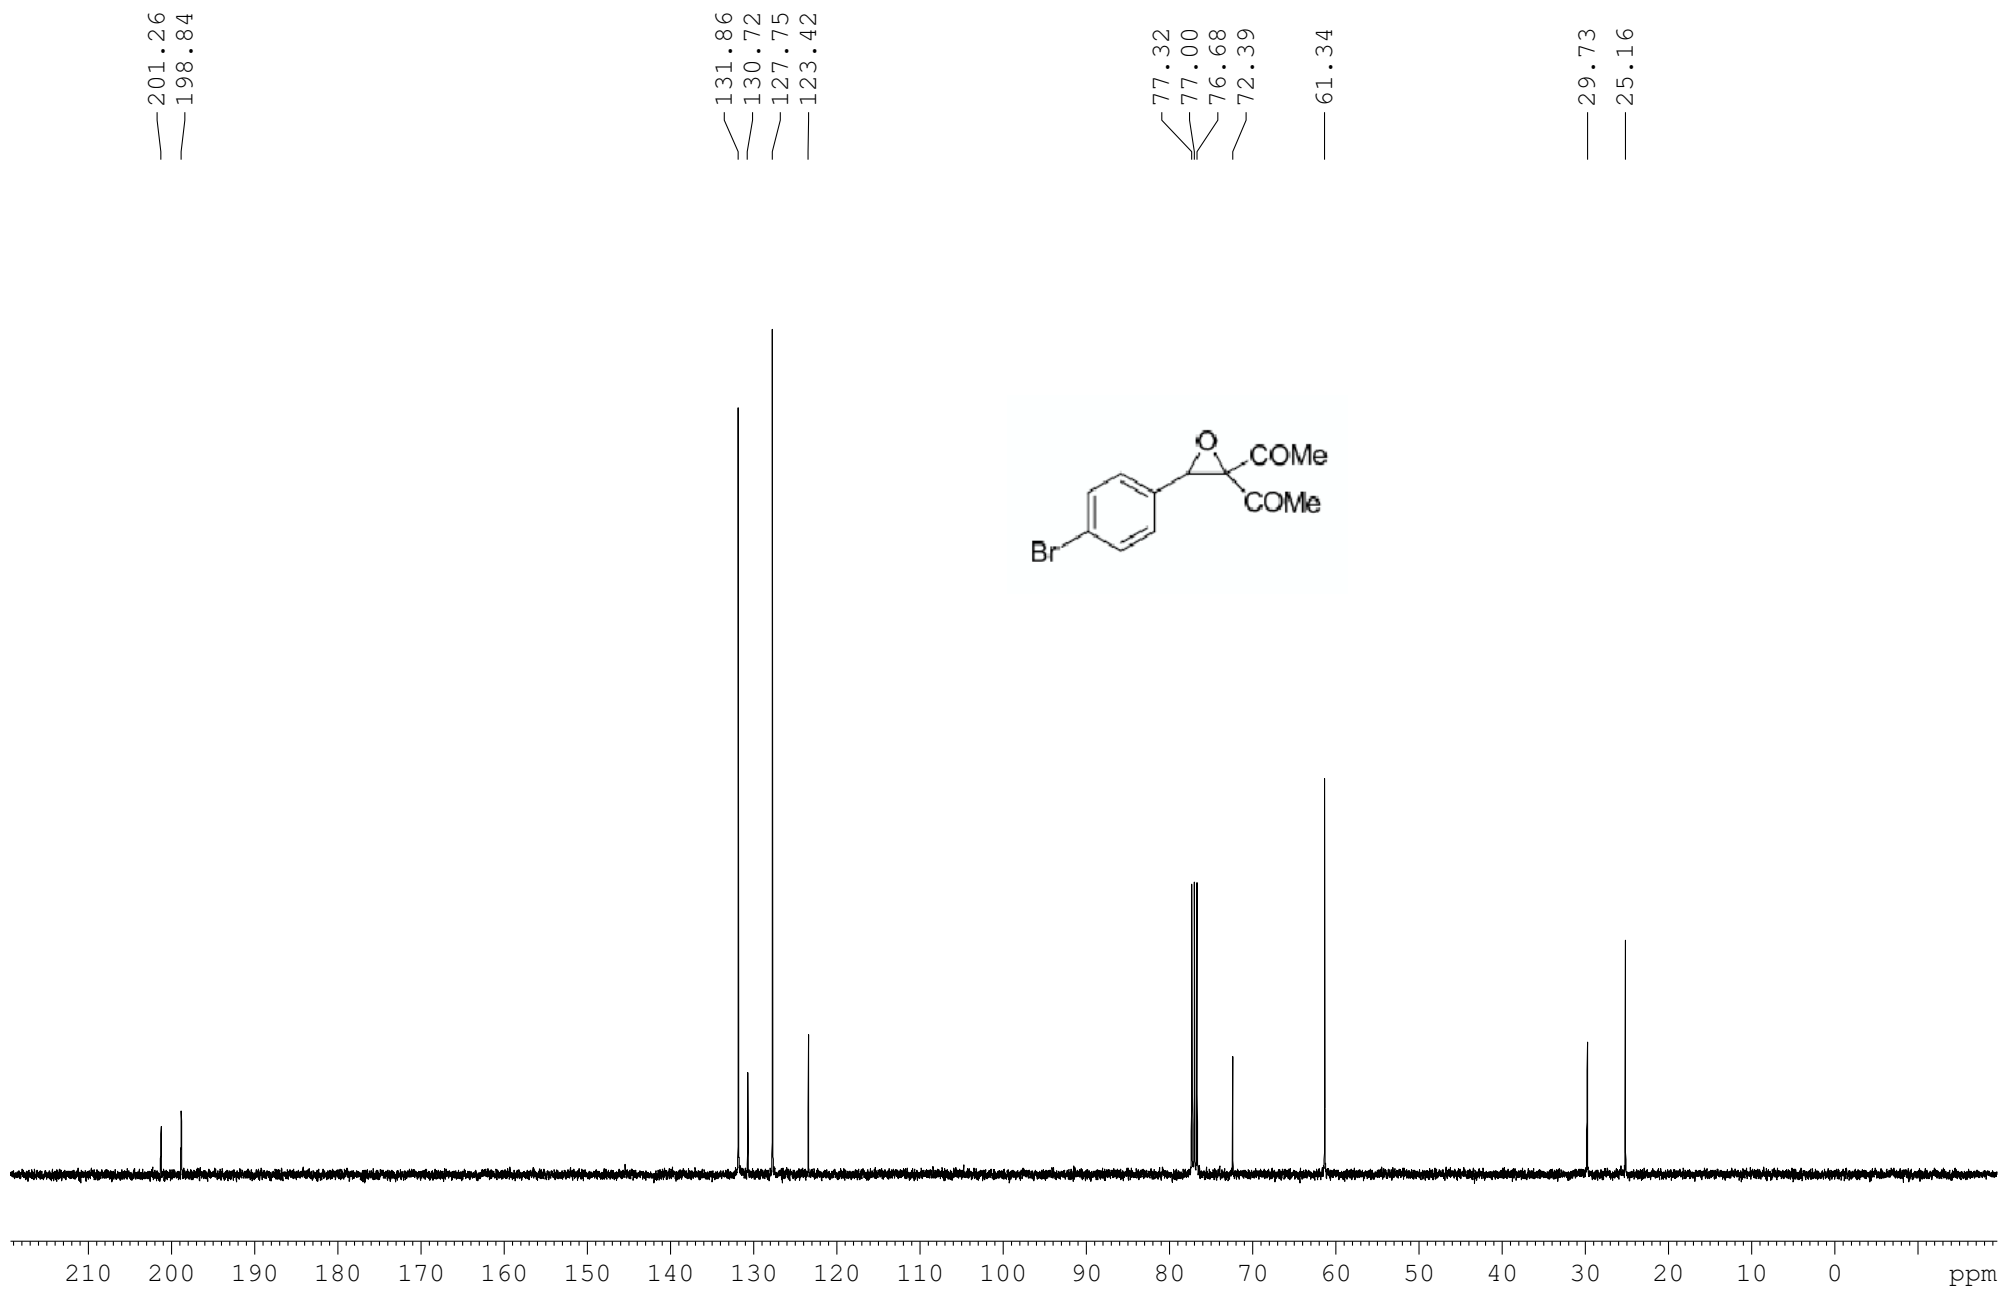



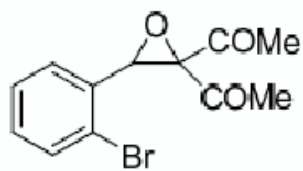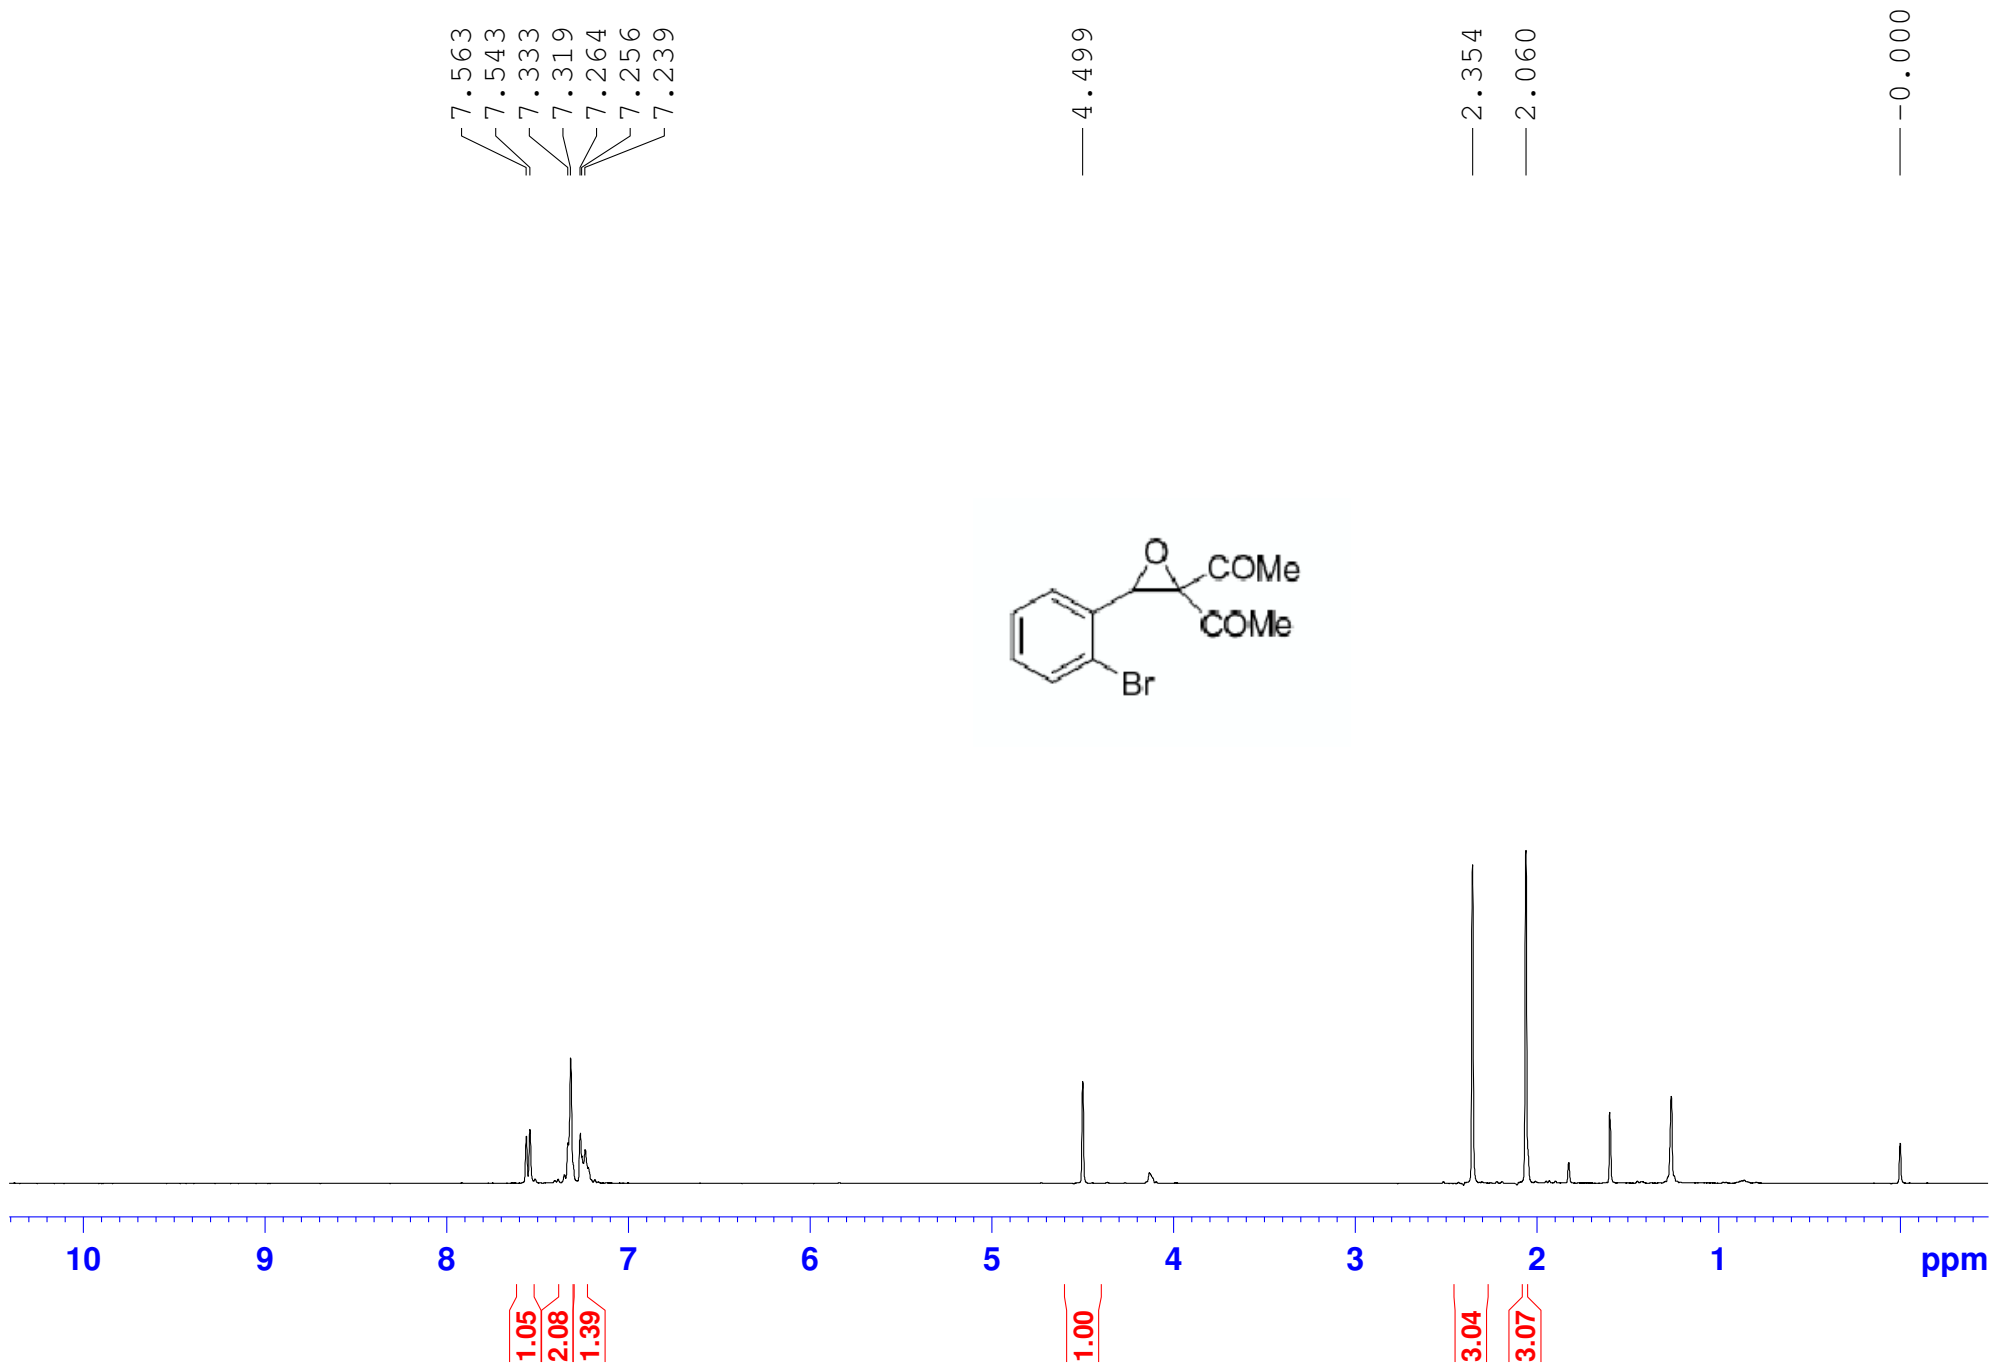

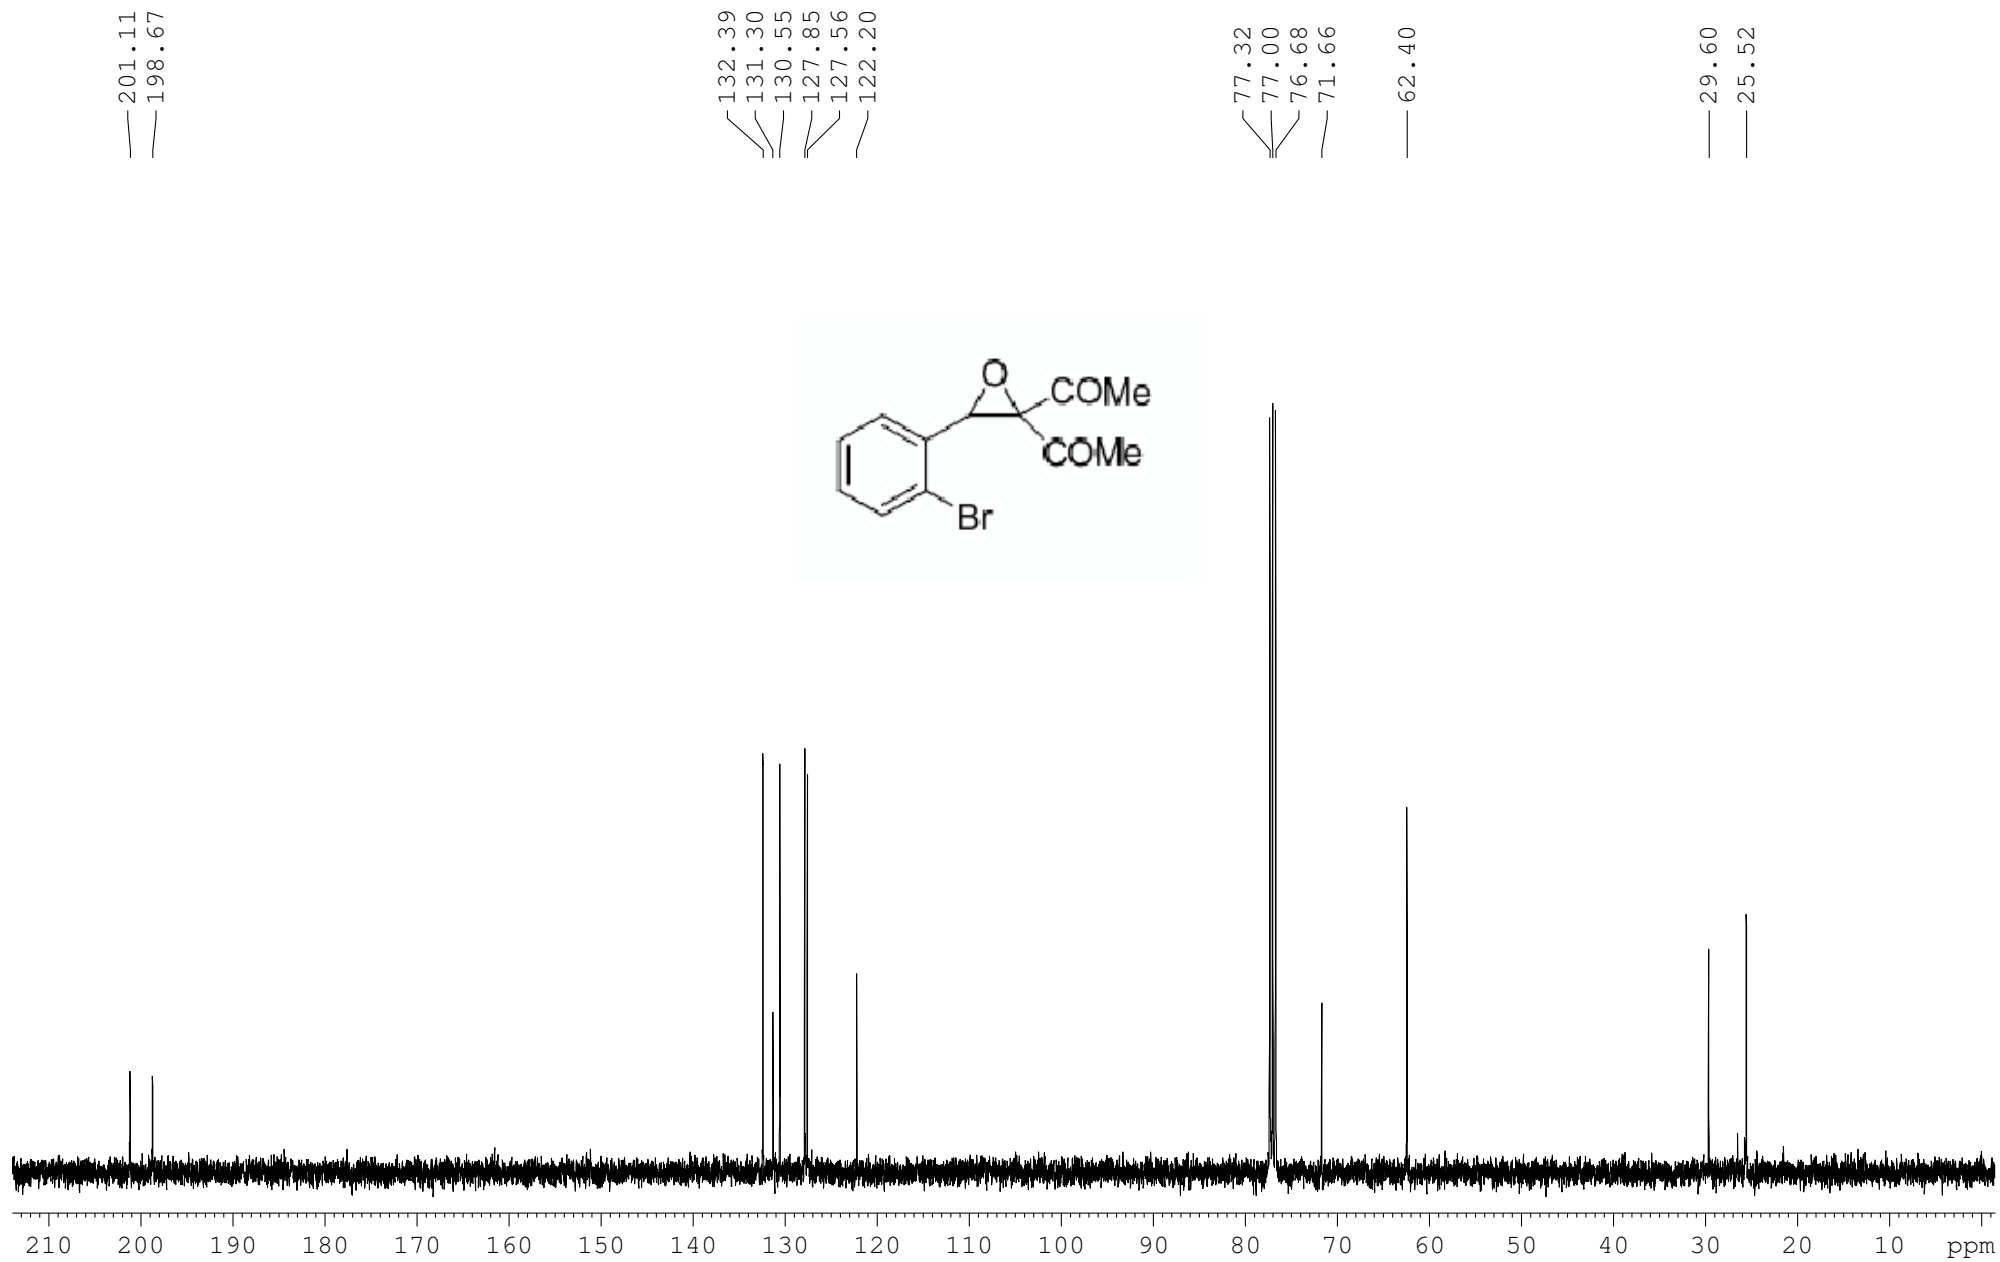

7.490  
7.460  
7.271  
7.255  
7.235  
7.217  
7.199

4.362

2.283  
2.051

0.000

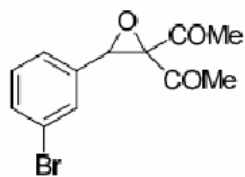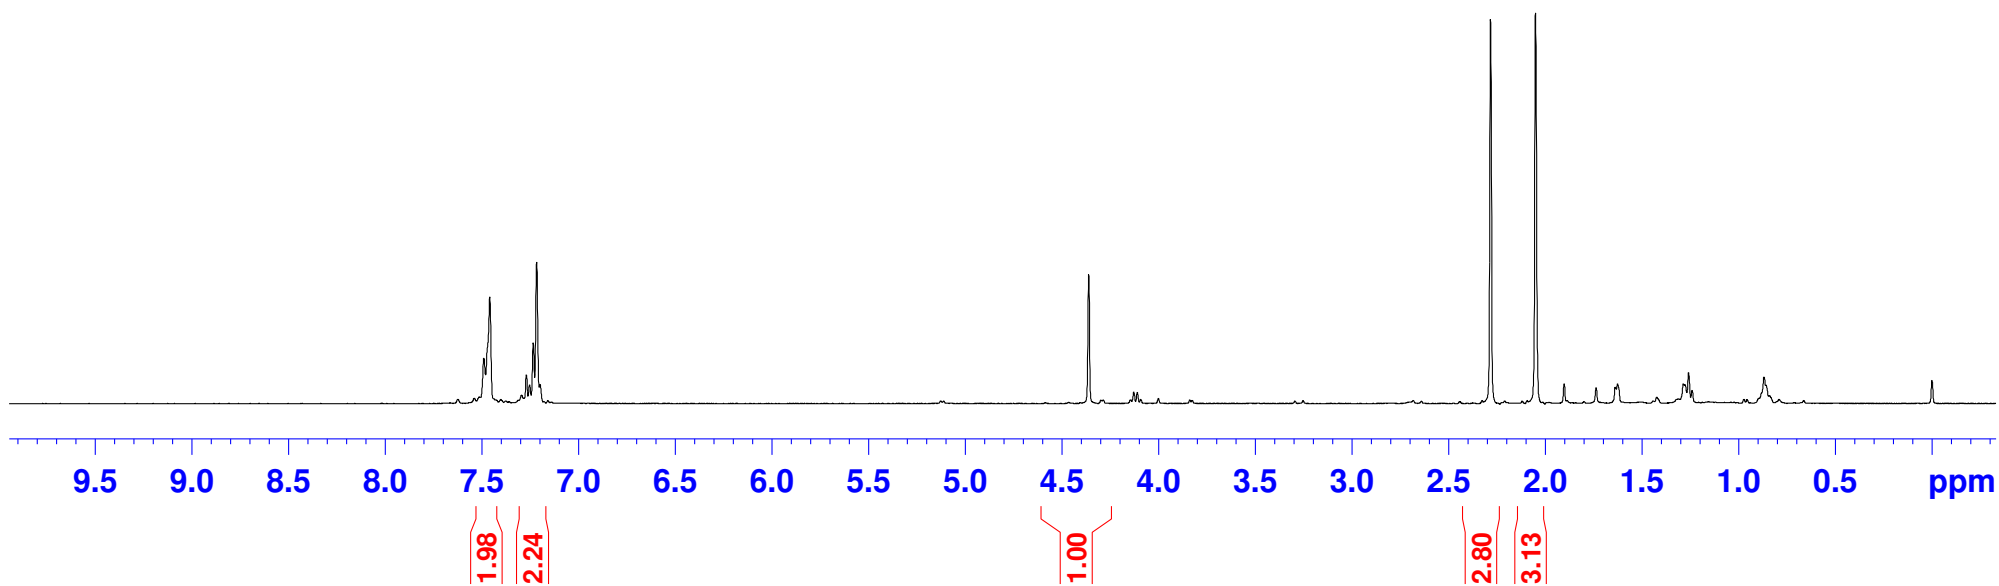

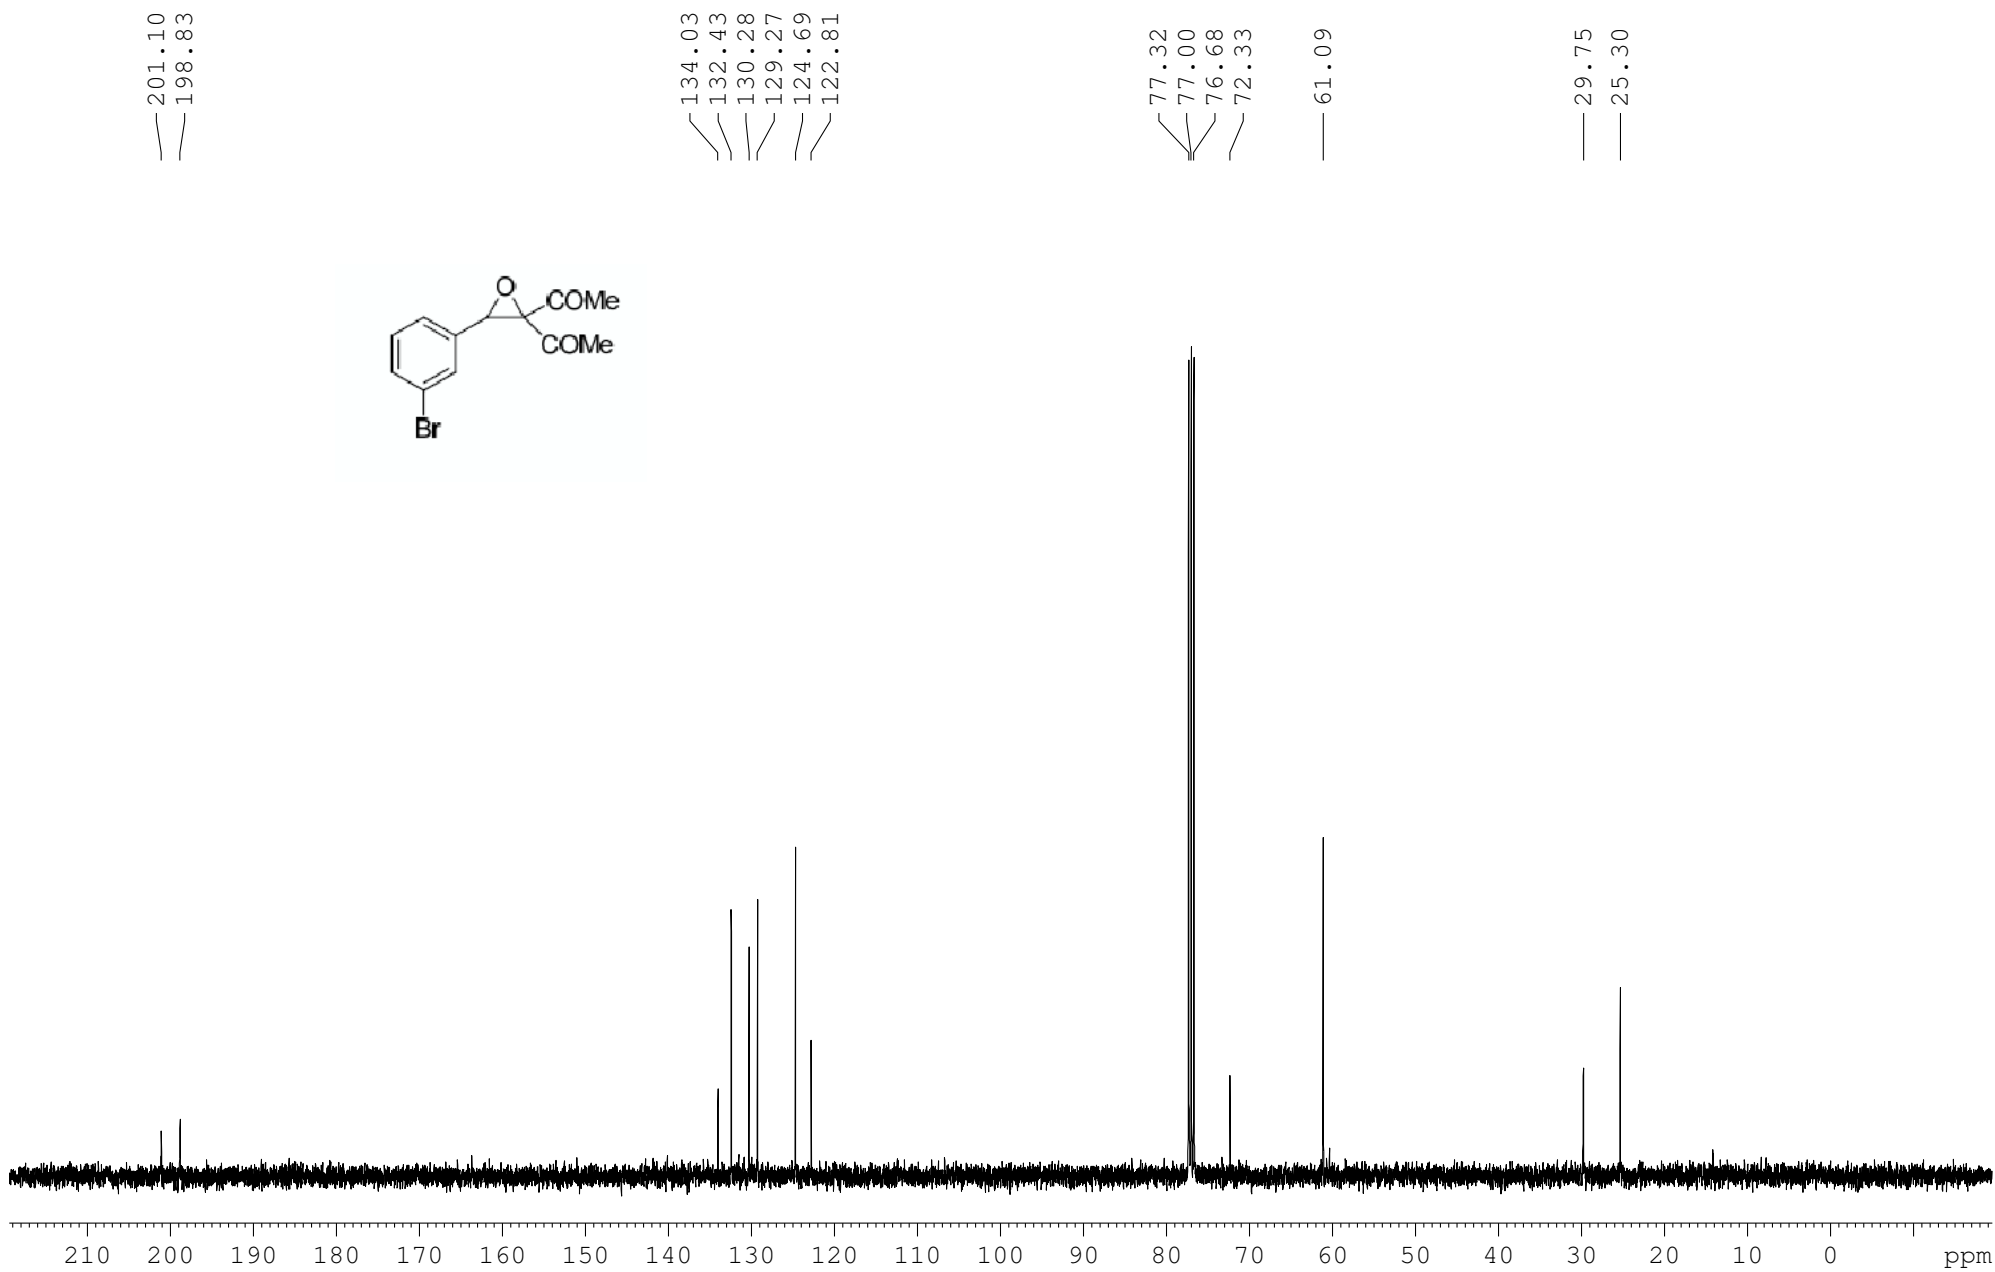

7.270  
7.077  
7.056  
7.035

4.379

2.283  
2.027

-0.001

LRR5-139-11

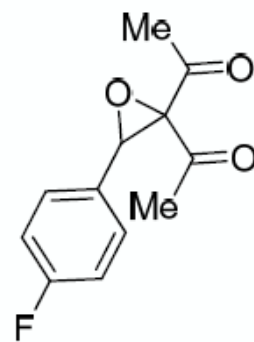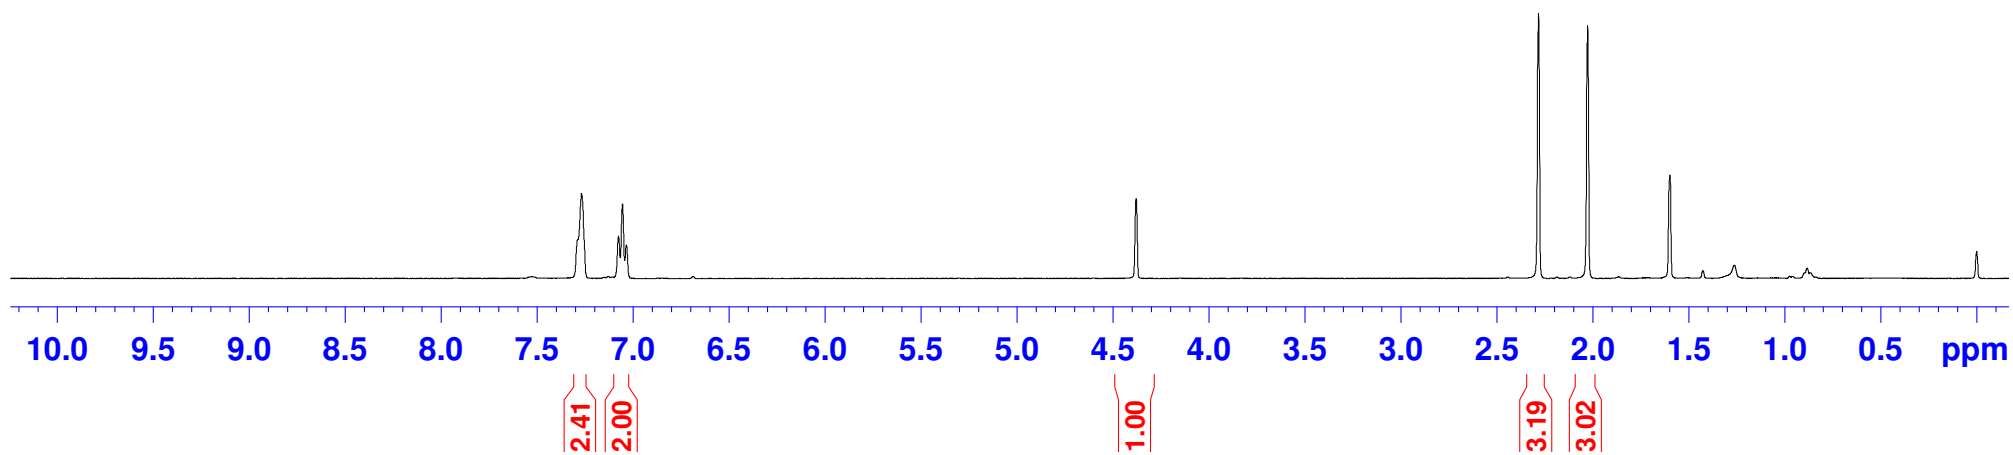

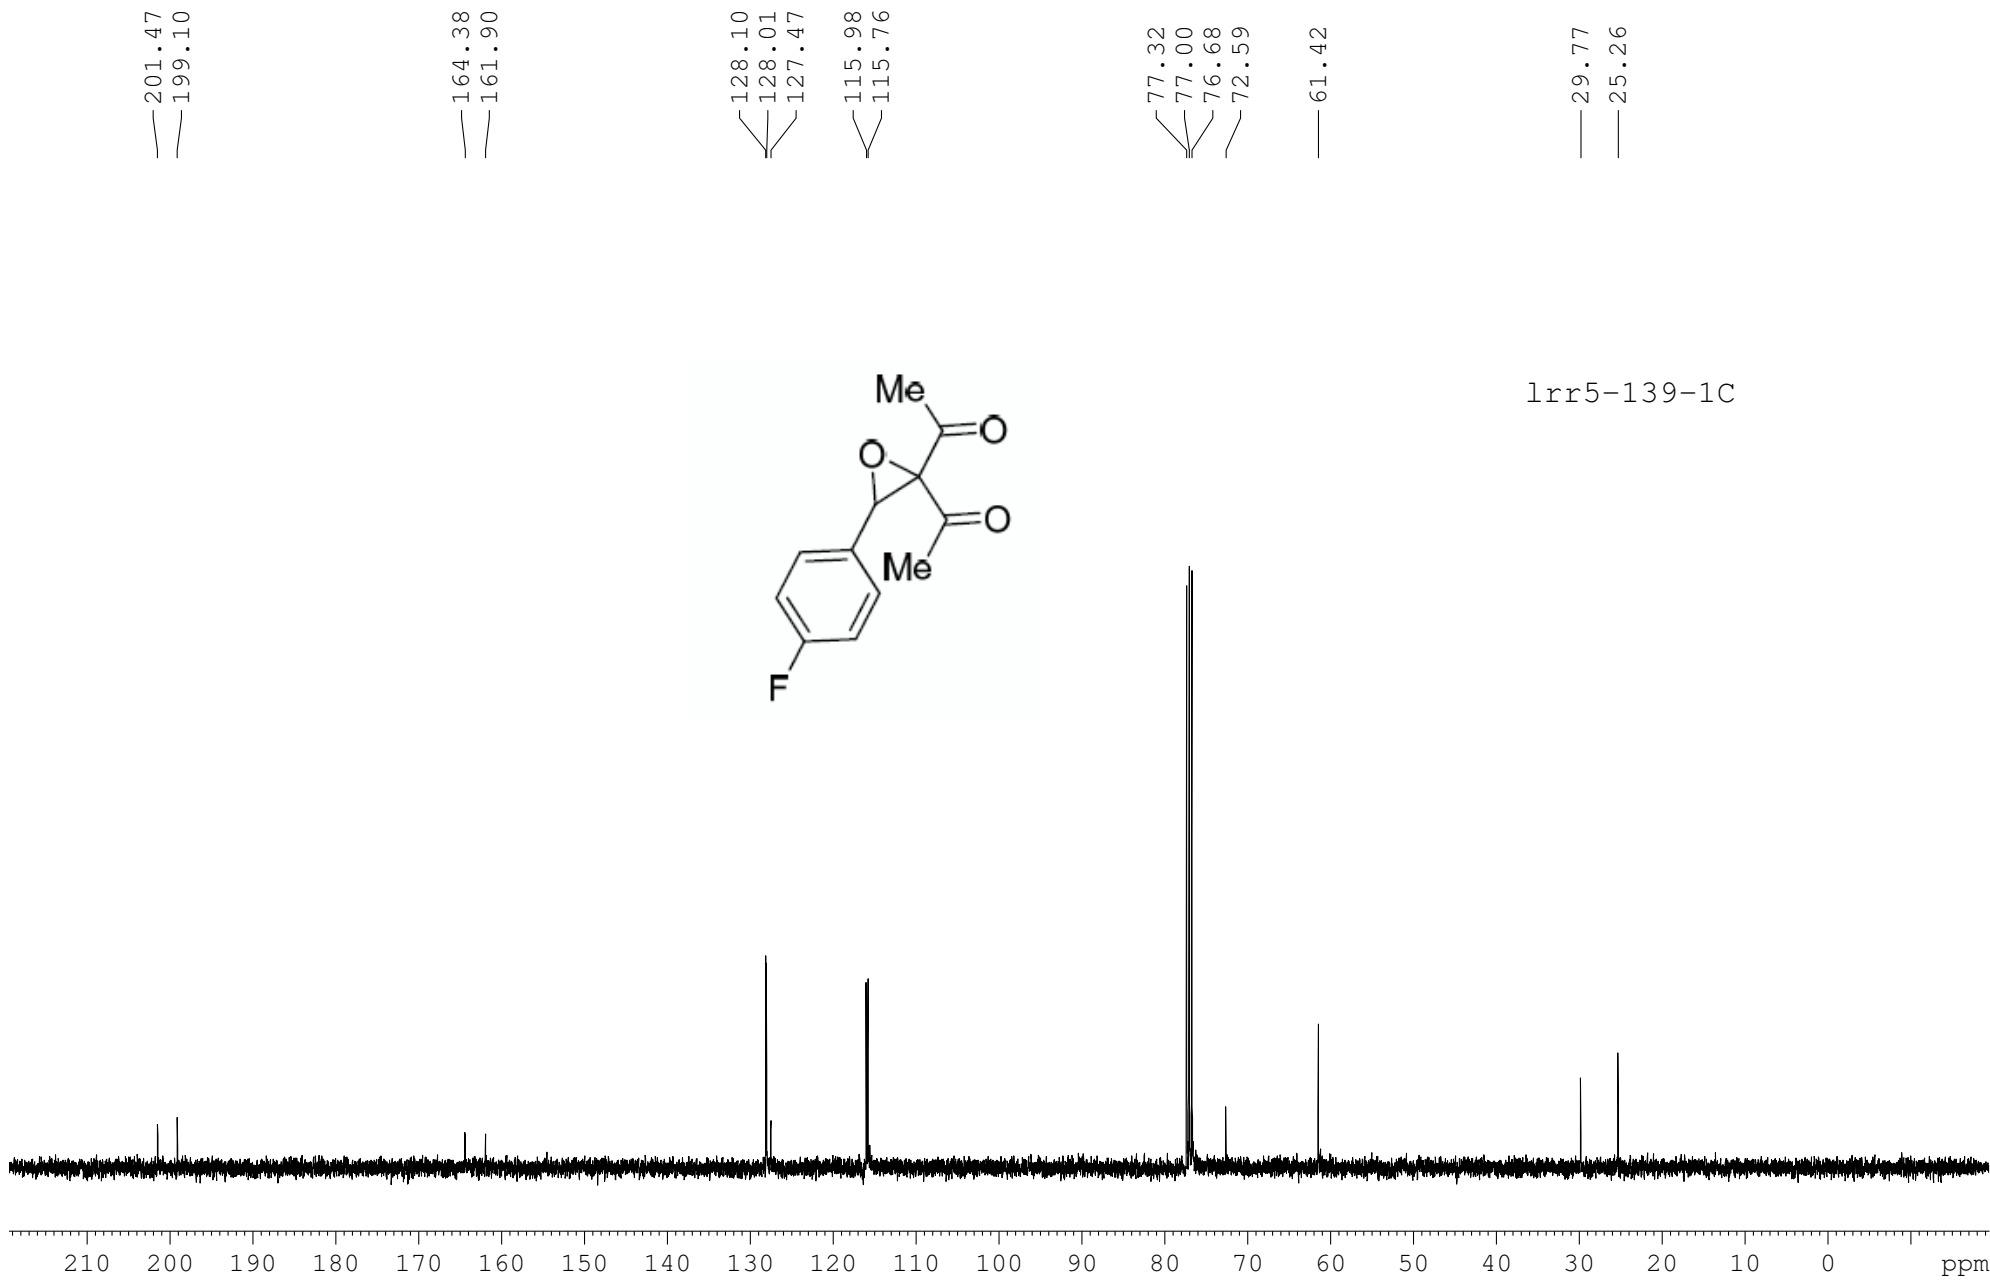

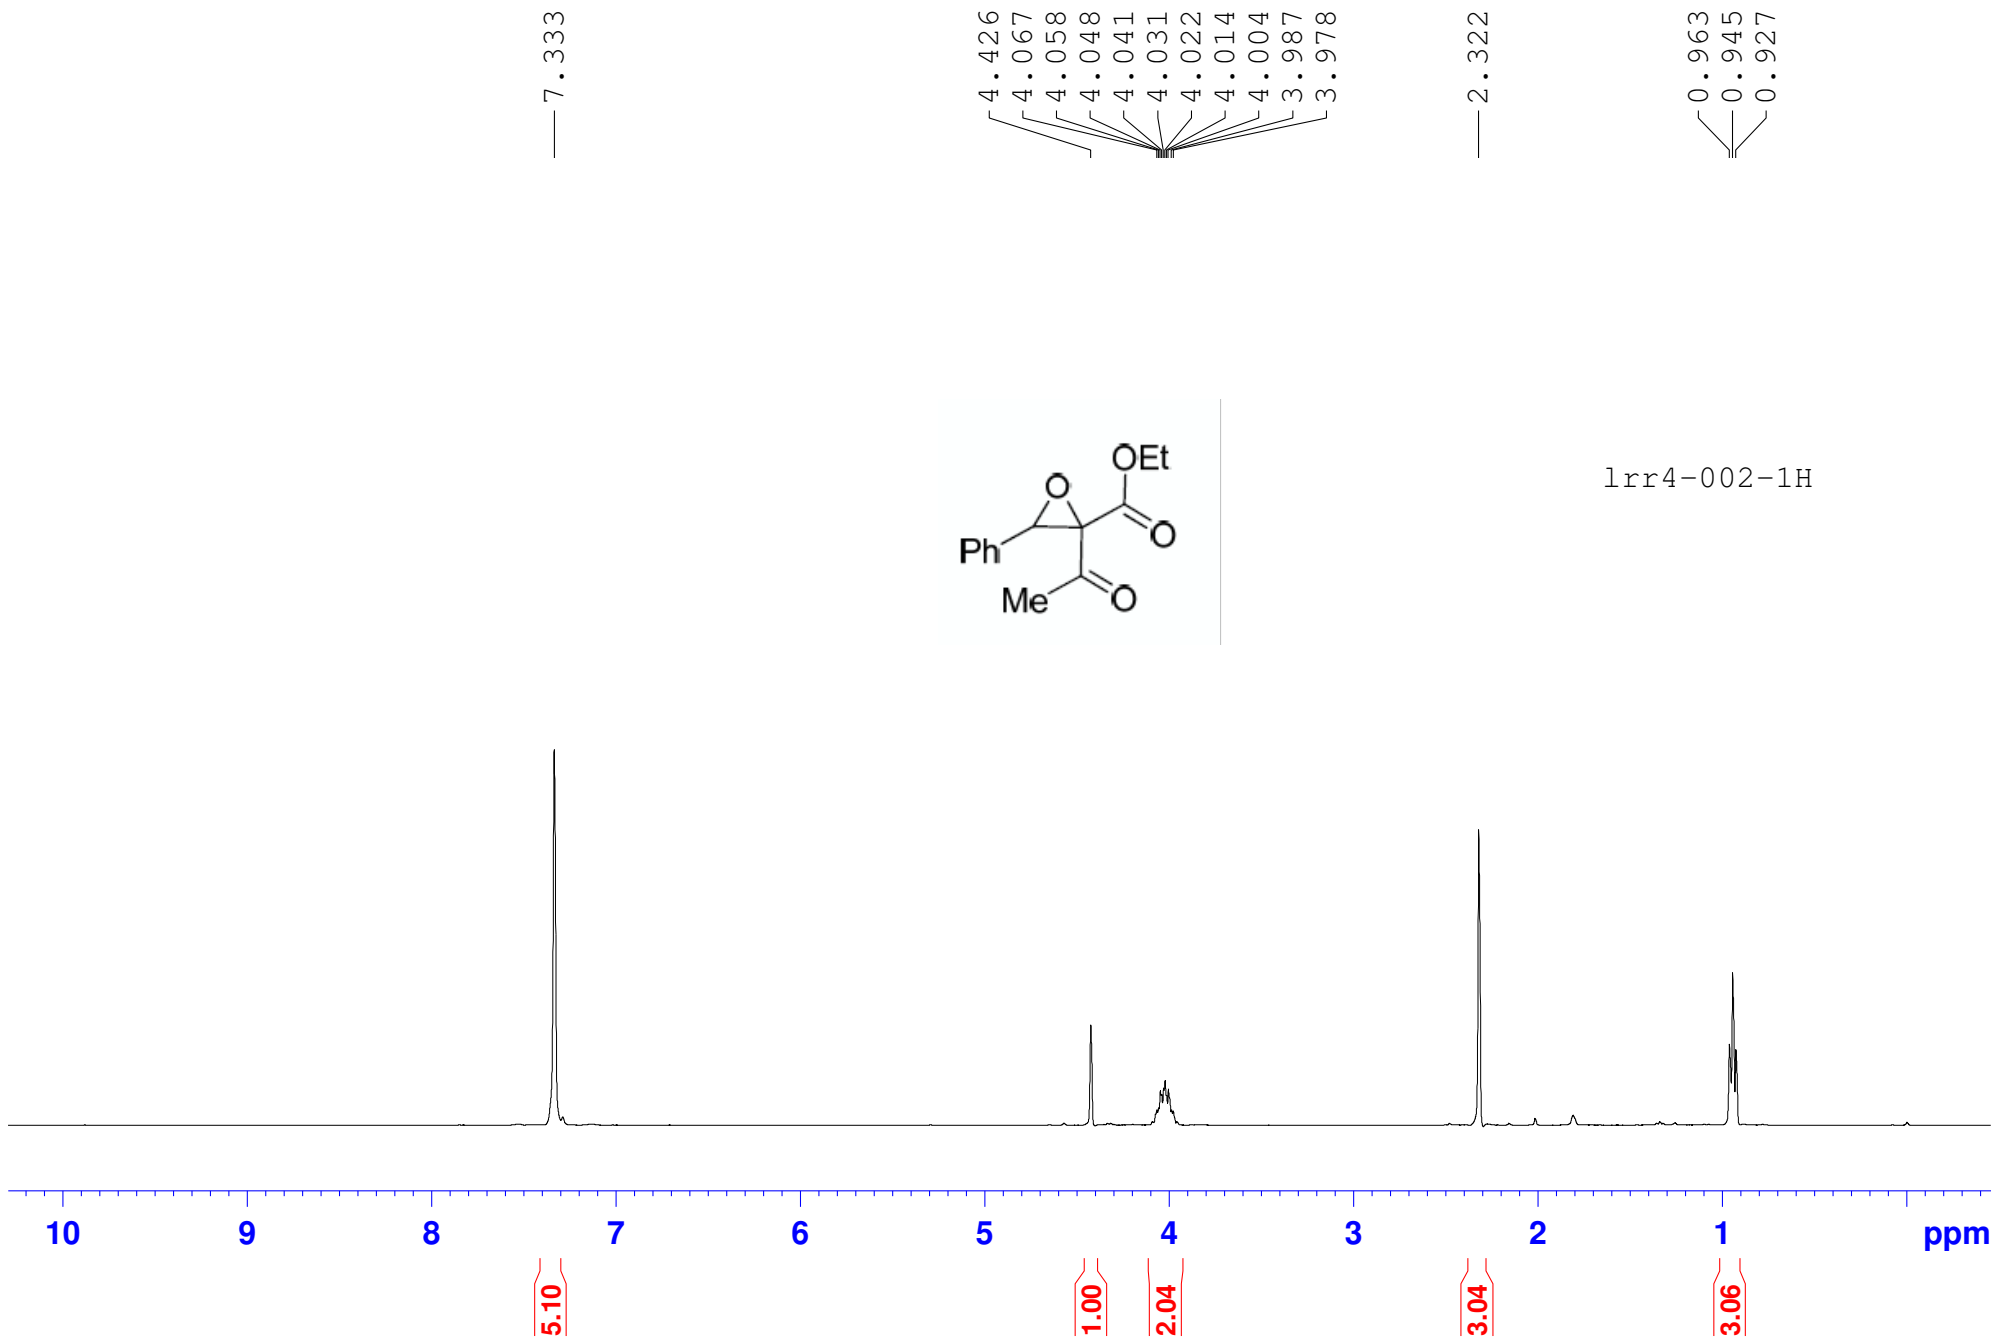

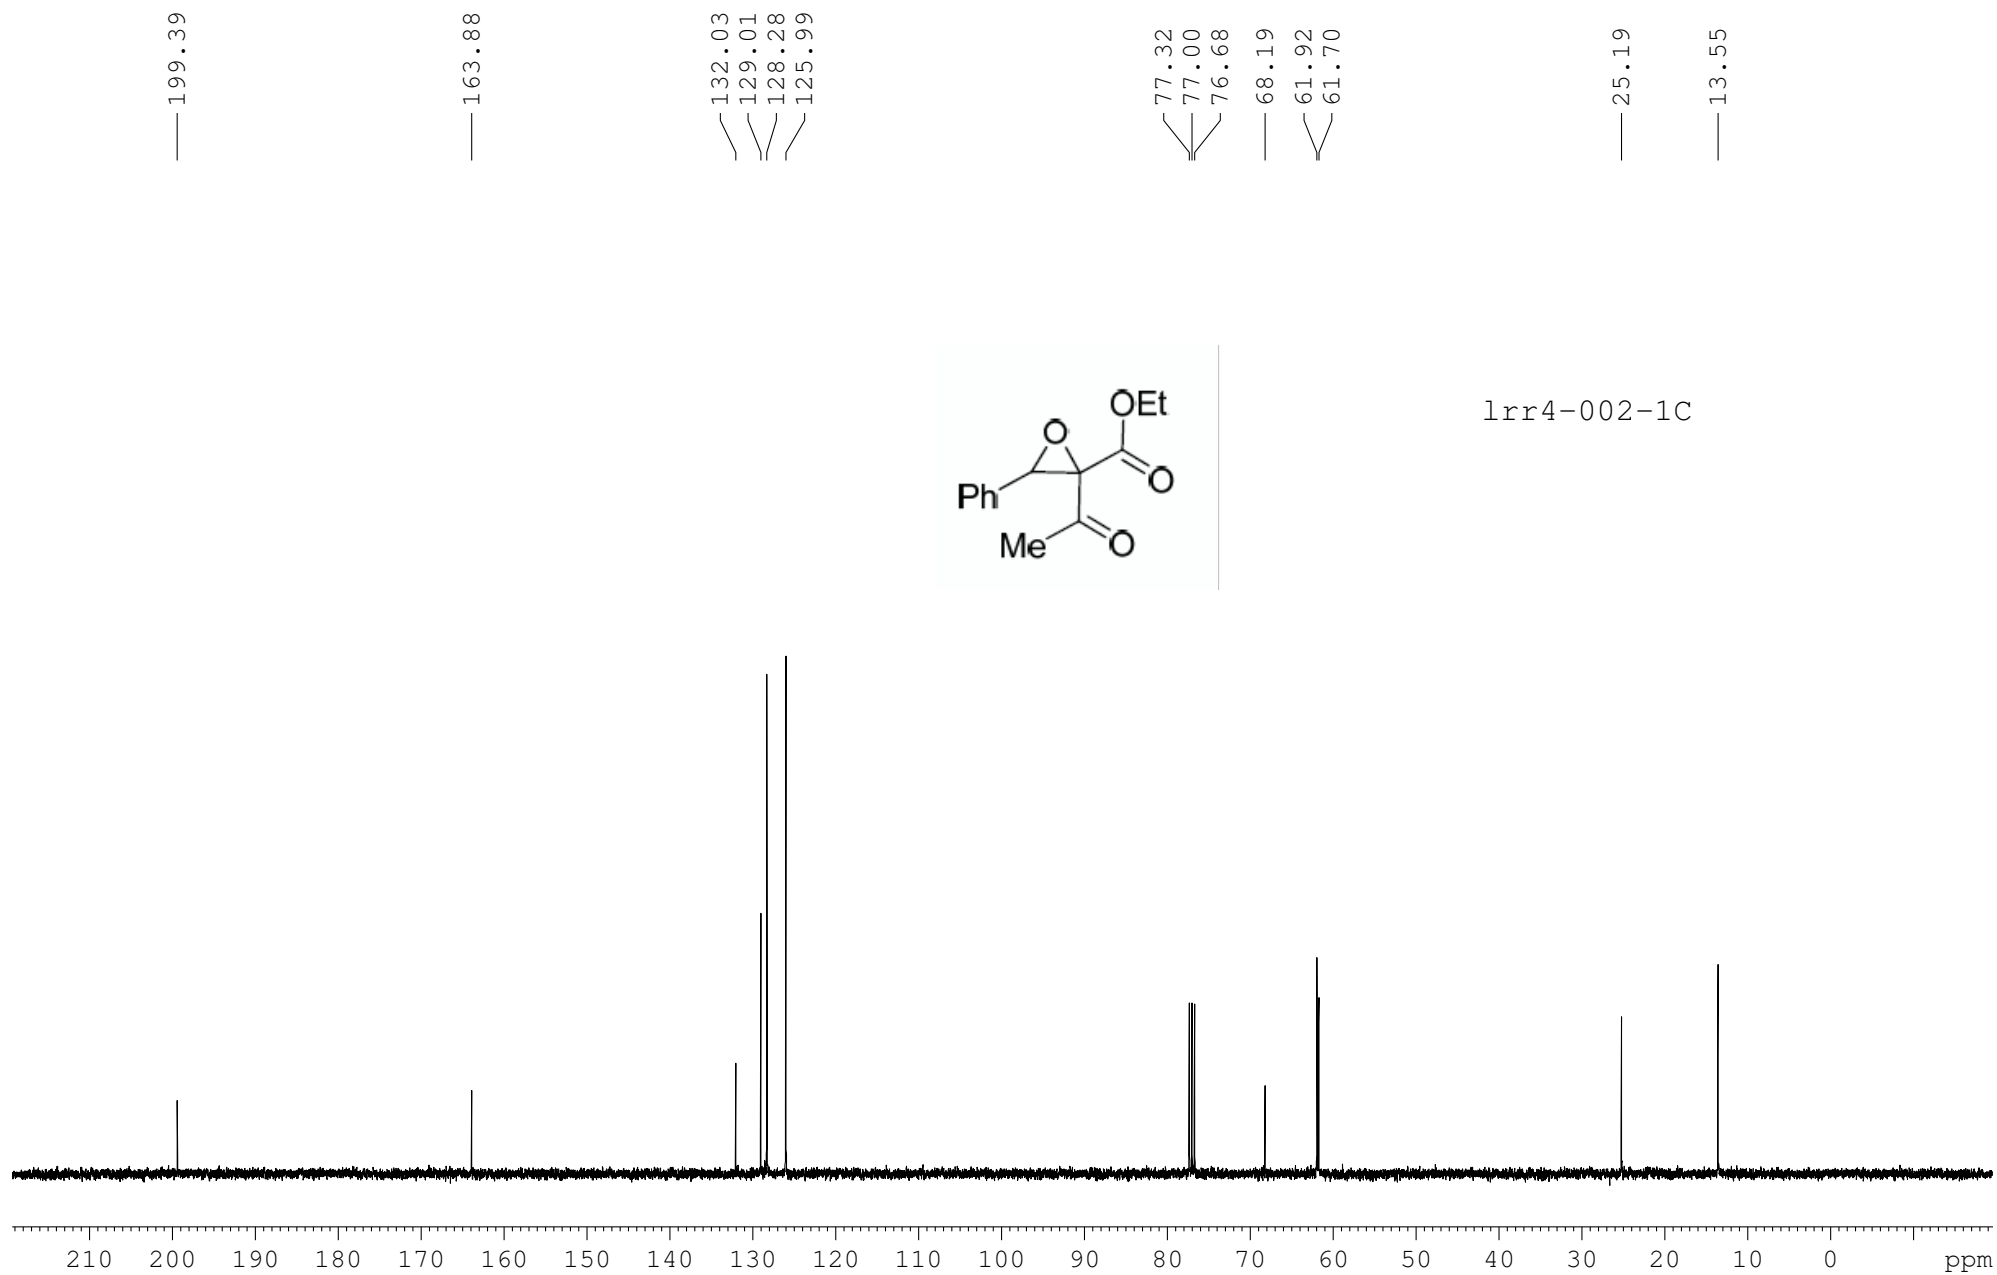

lrr4-002-1C



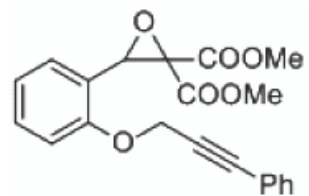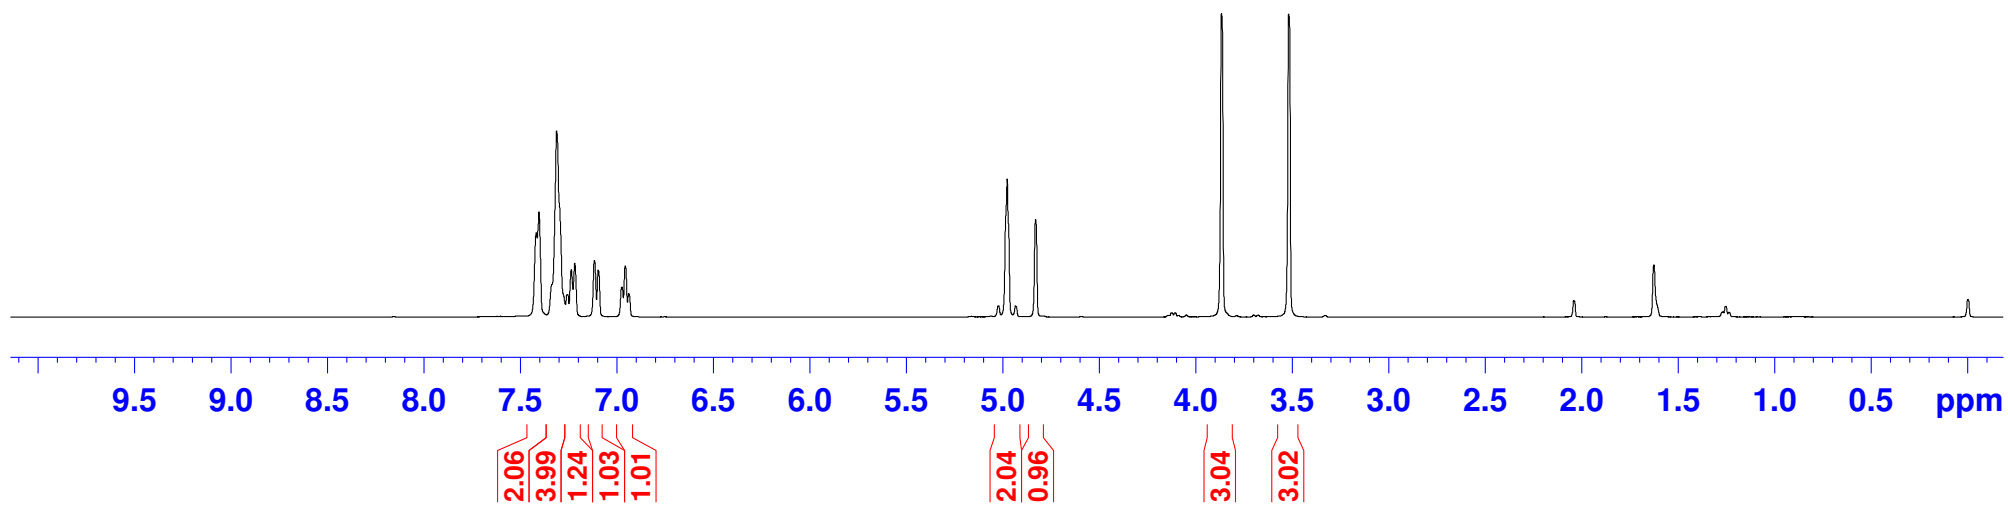

7.420  
7.405  
7.314  
7.256  
7.238  
7.220  
7.118  
7.098  
6.975  
6.958  
6.940

5.025  
4.979  
4.935  
4.832

3.868  
3.519

-0.000

165.98  
164.11  
156.49

131.72  
129.96  
128.73  
128.29  
126.23  
122.12  
121.22  
121.09  
112.16

87.47  
83.62  
77.32  
77.00  
76.69

62.59  
59.23  
57.01  
53.41  
52.48

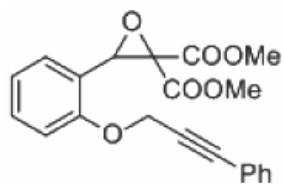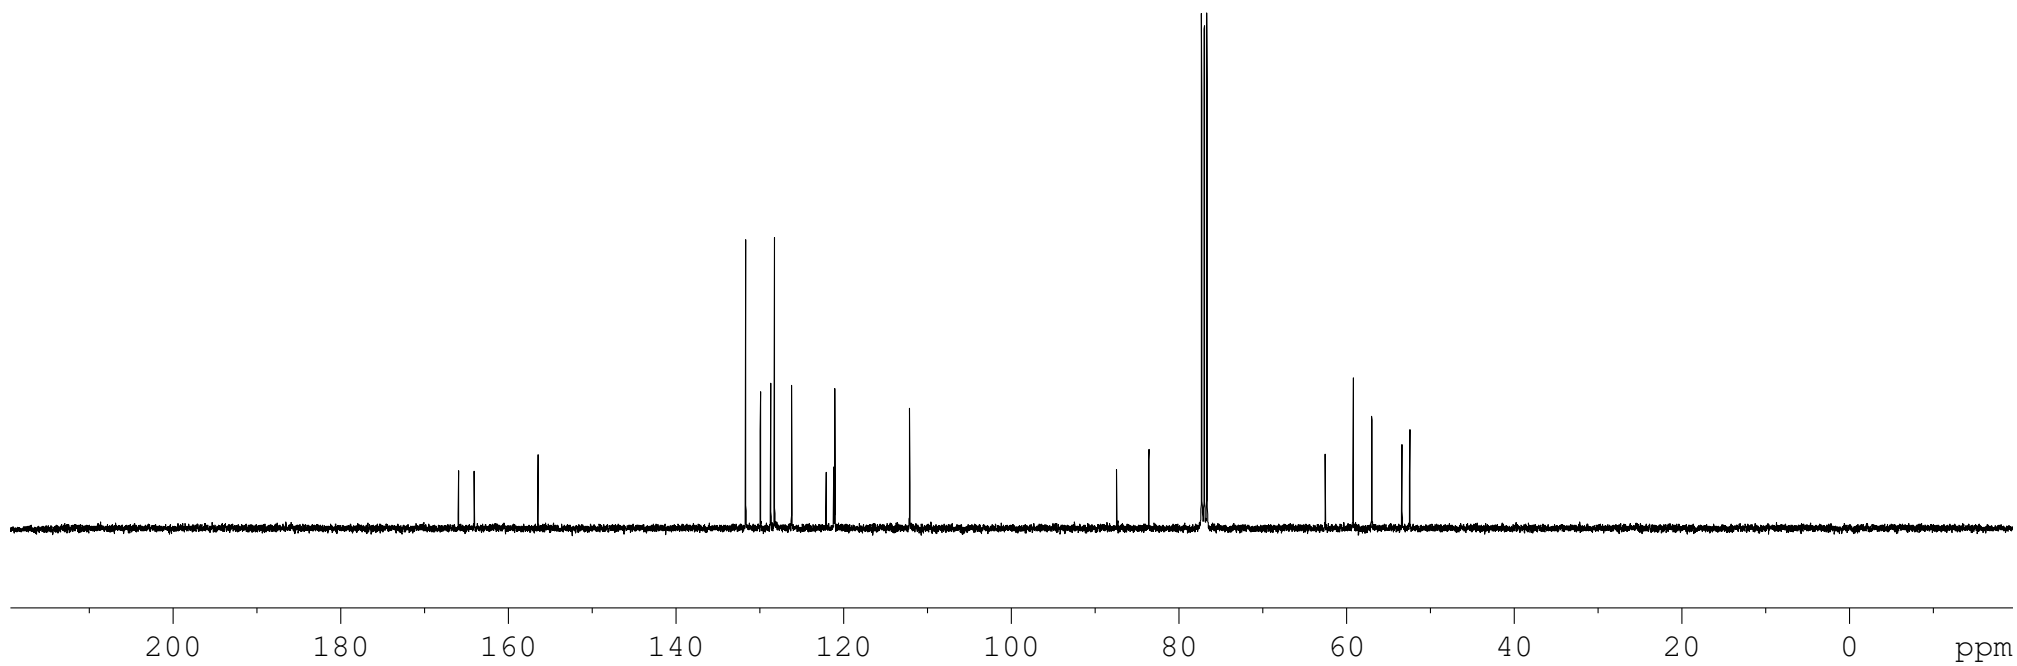

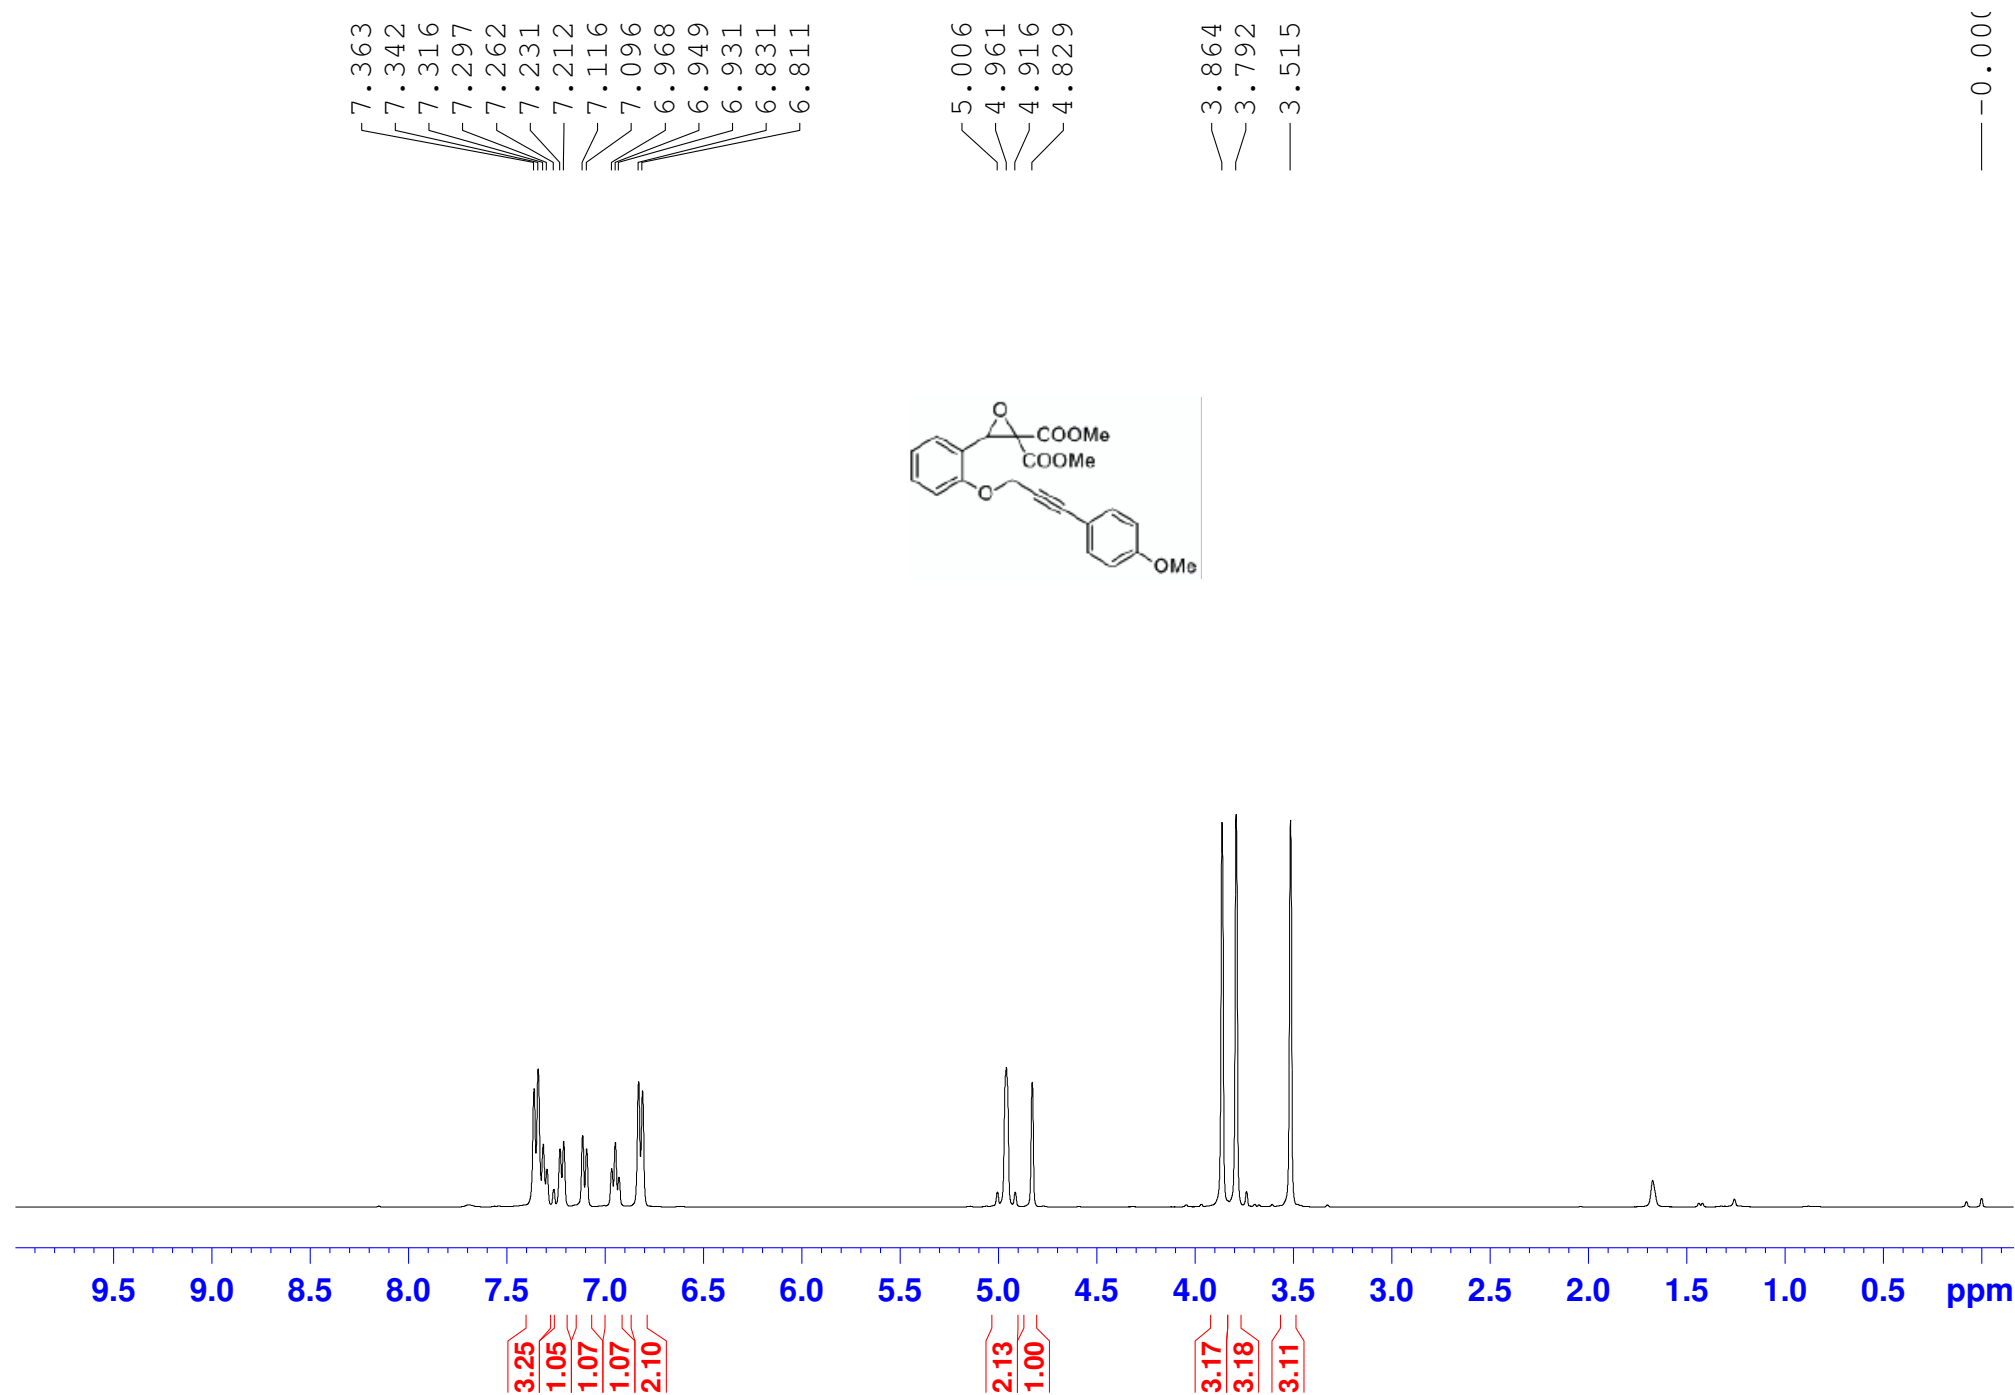

165.96  
164.09  
159.90  
156.53

133.22  
129.92  
126.15  
121.16  
120.96  
114.14  
113.90  
112.16

87.43  
82.26  
77.32  
77.00  
76.68  
62.57  
59.21  
57.09  
55.22  
53.38  
52.45

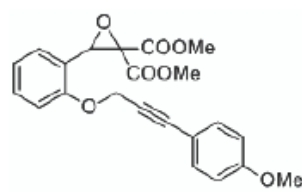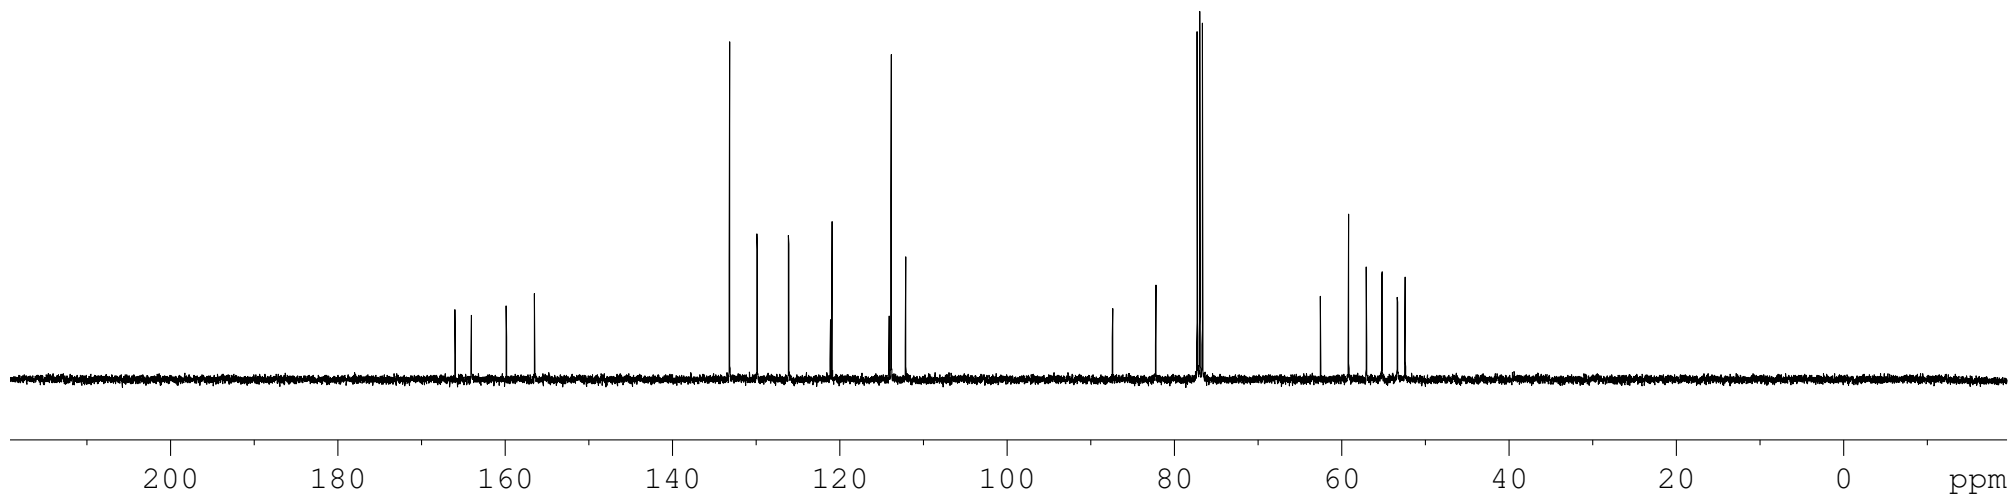

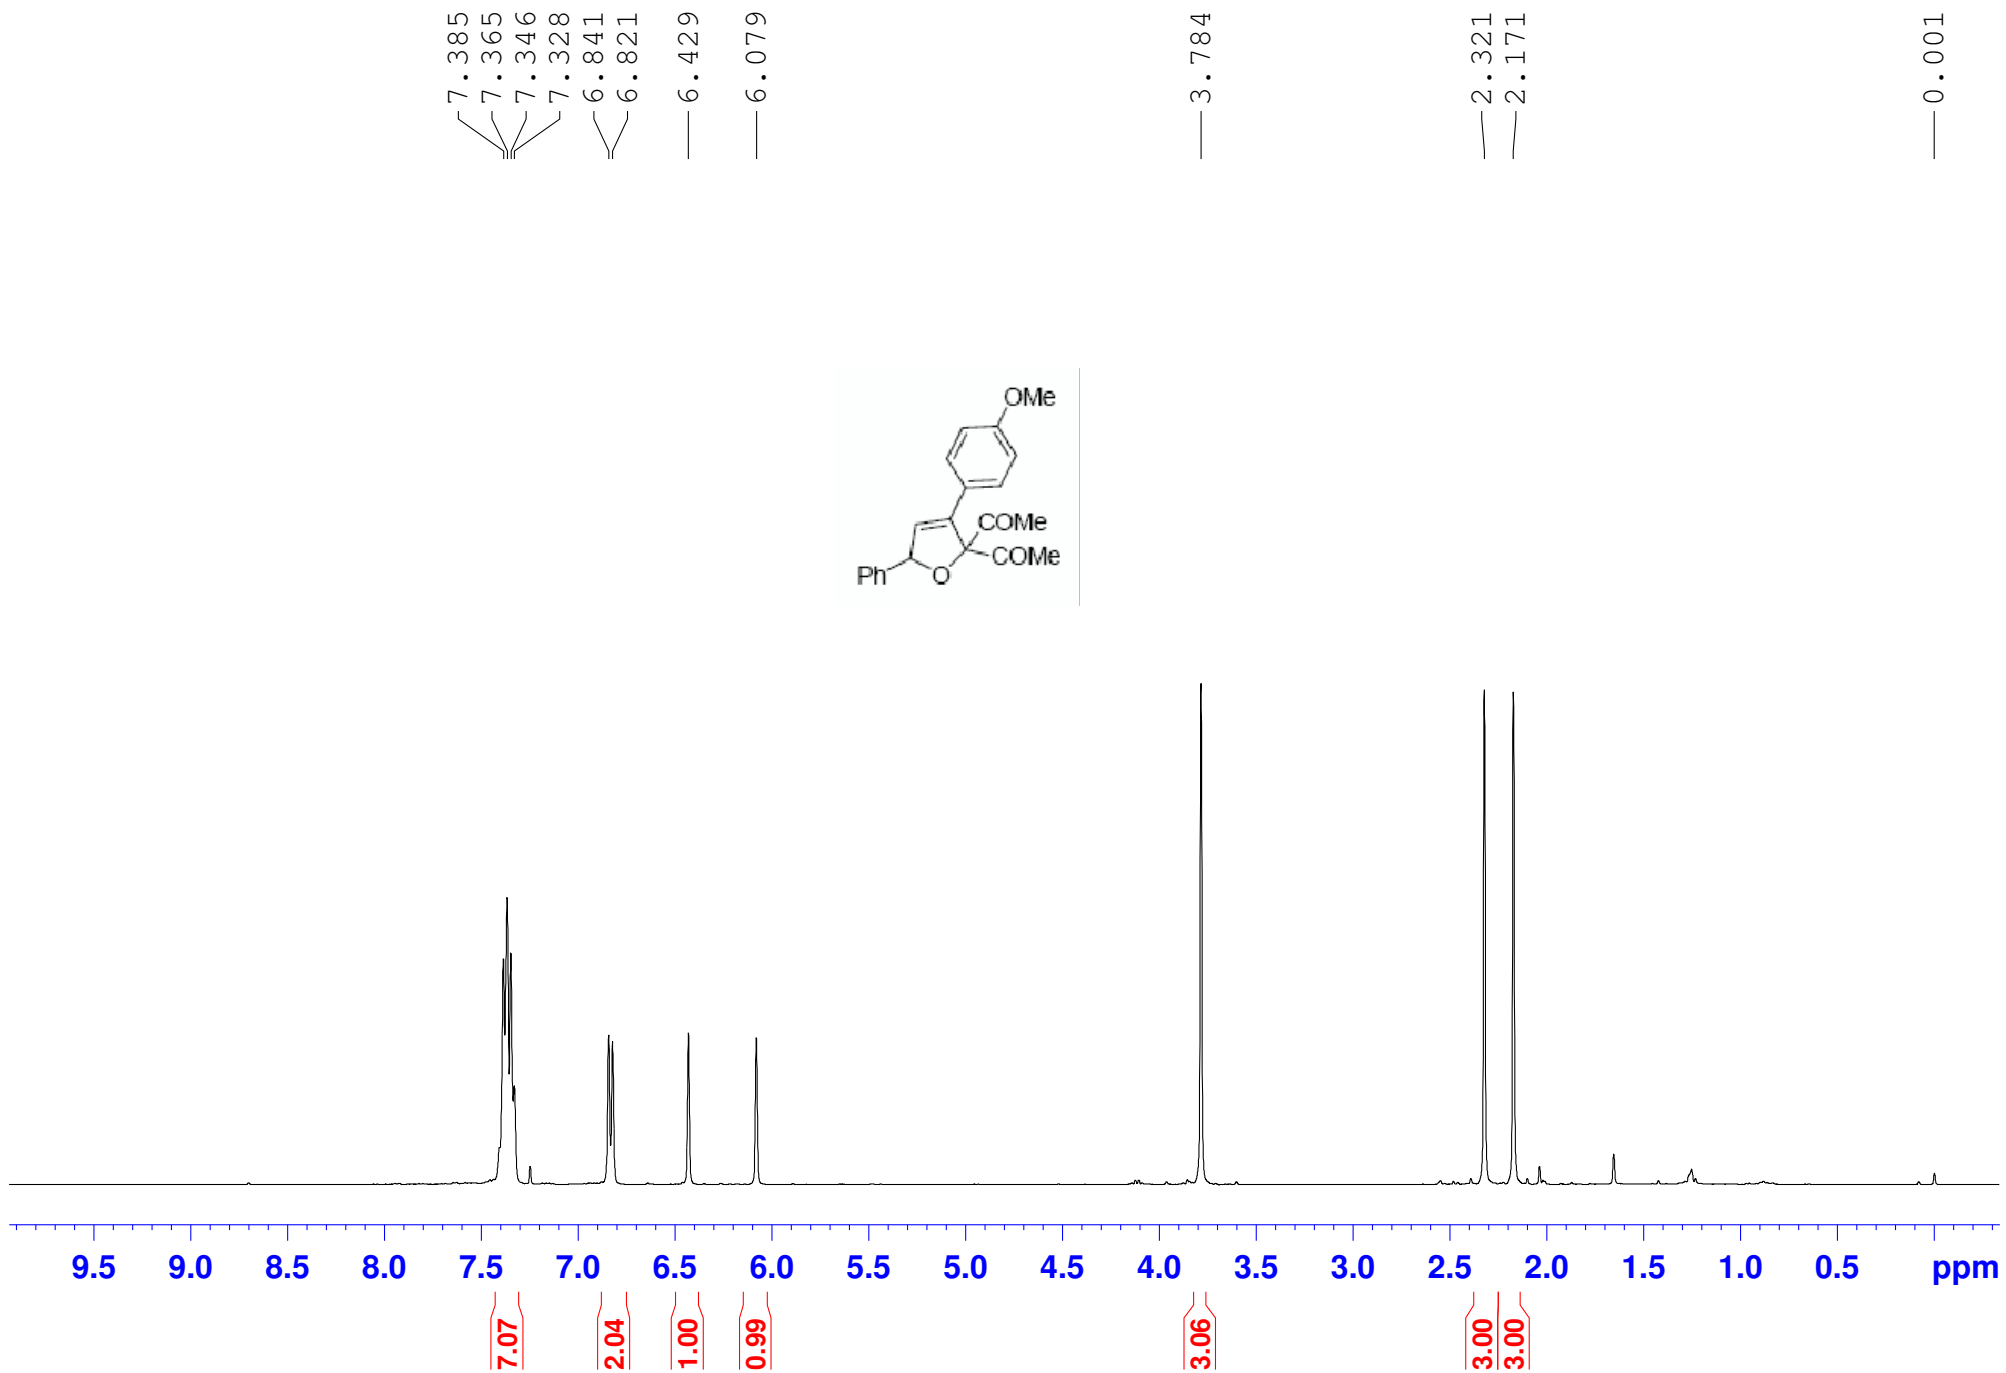

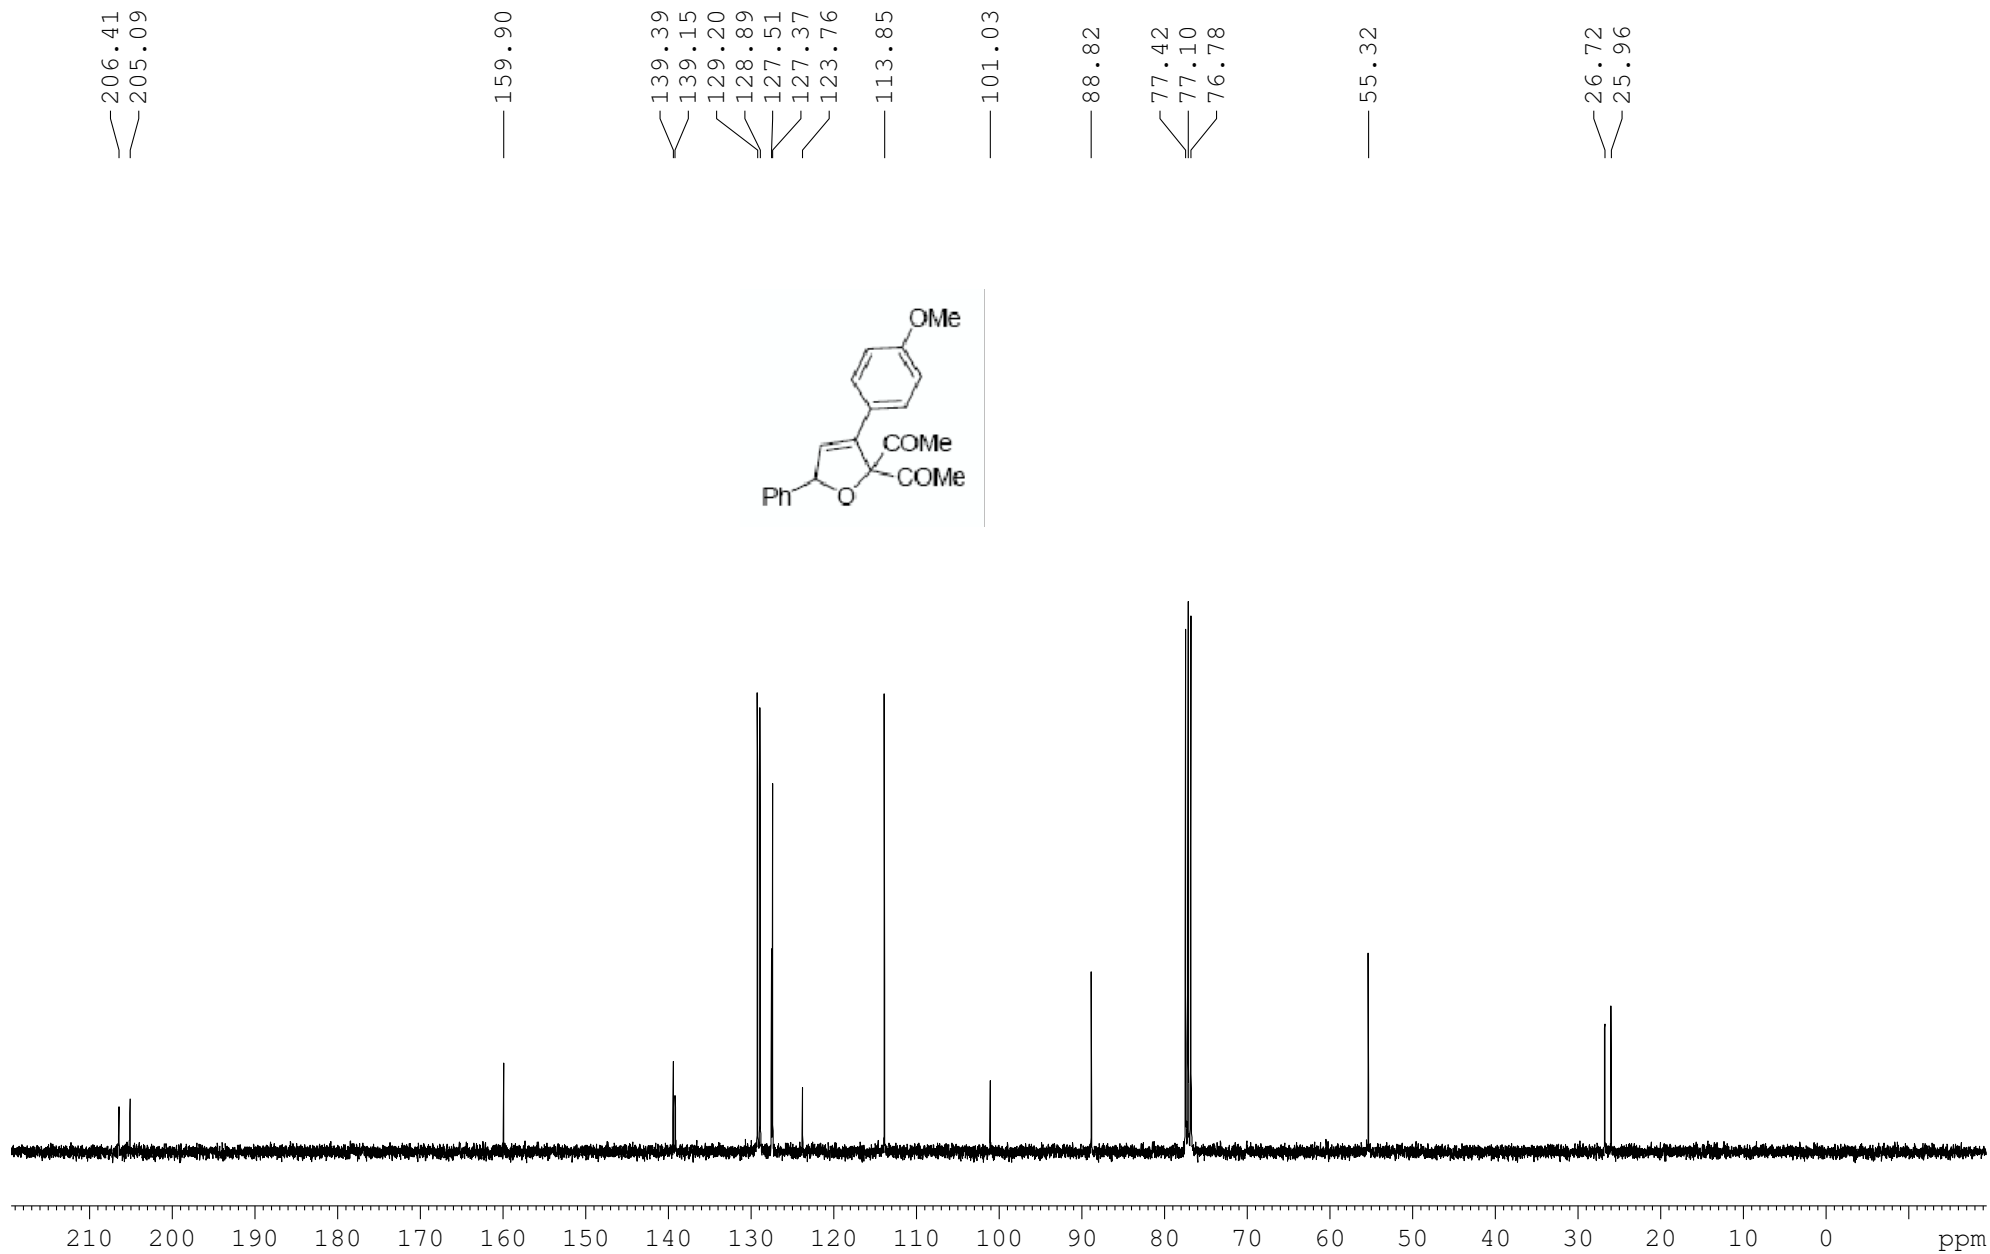

7.431  
7.415  
7.398  
7.374  
7.348  
7.330  
7.258  
7.156  
7.135  
6.885  
6.864  
— 5.926

3.802  
2.338  
2.211  
2.193  
2.175  
2.155  
2.131  
1.745  
1.730  
1.717  
1.256  
1.227  
1.207  
1.198  
1.188  
1.164  
1.143  
1.107  
1.091  
0.746  
0.728  
0.712

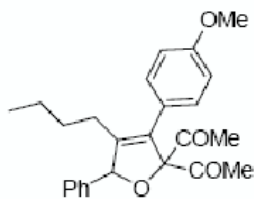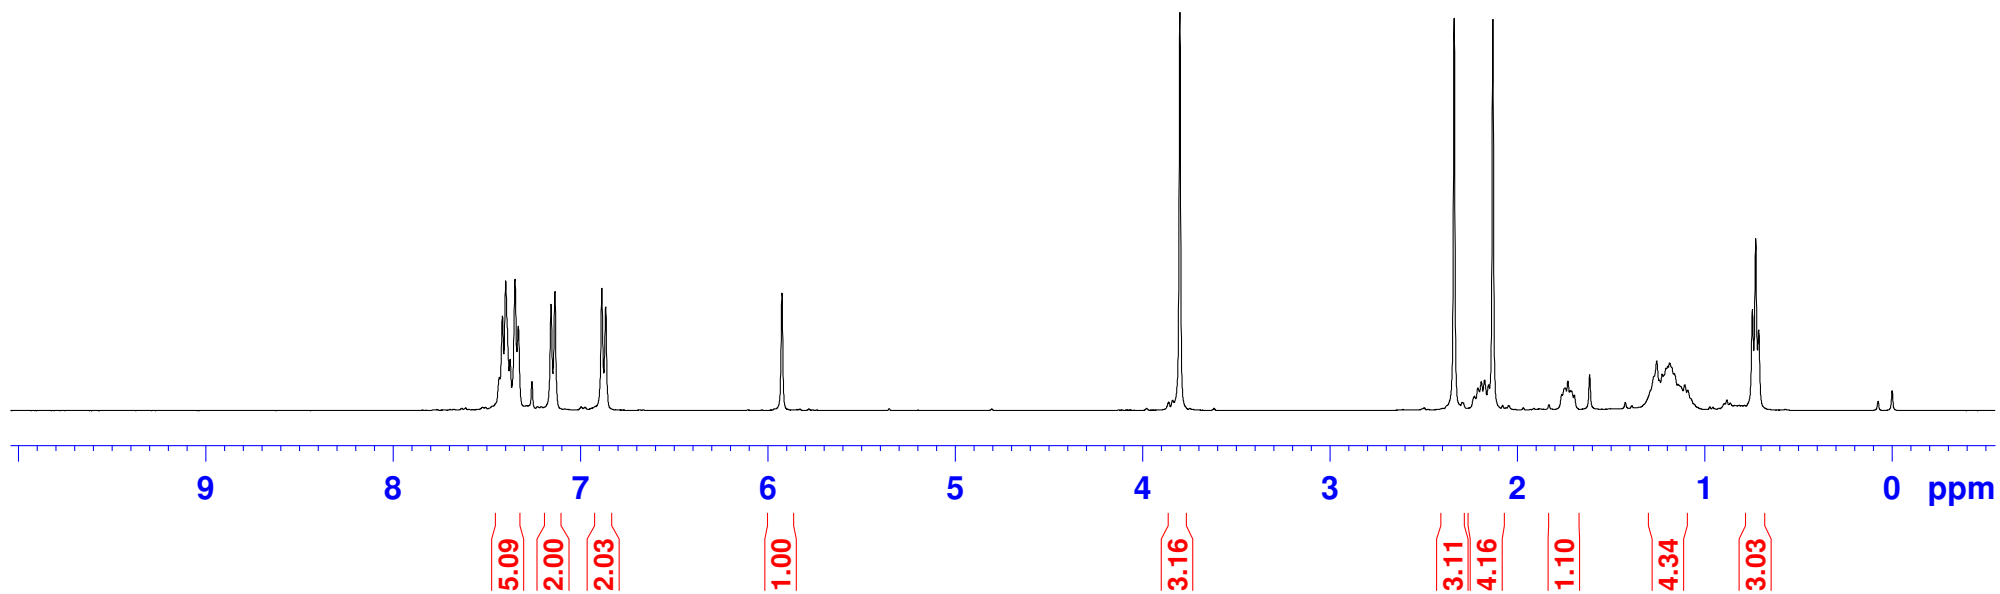

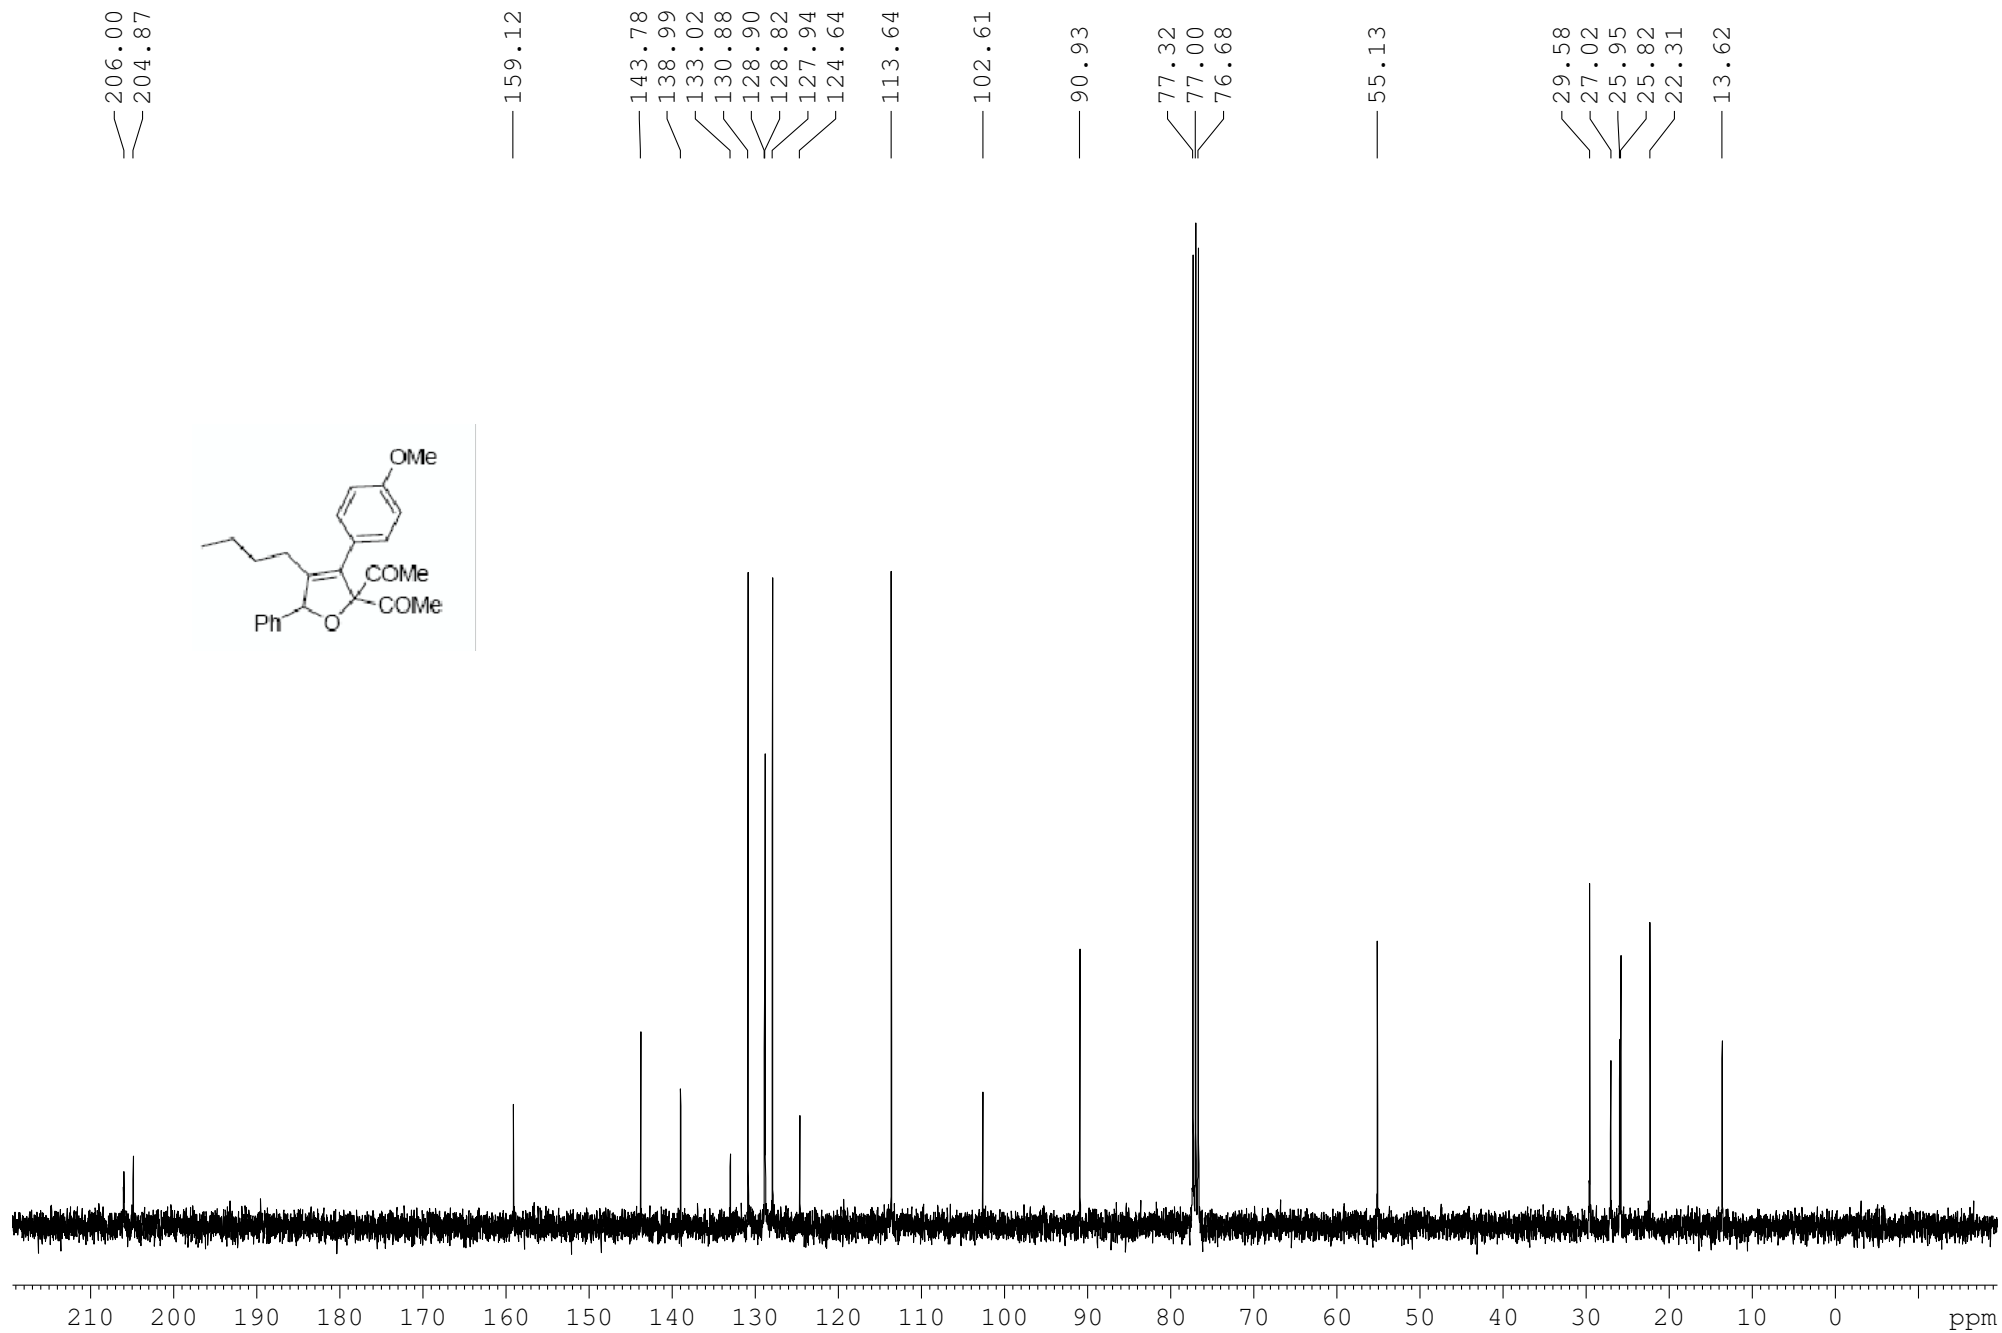



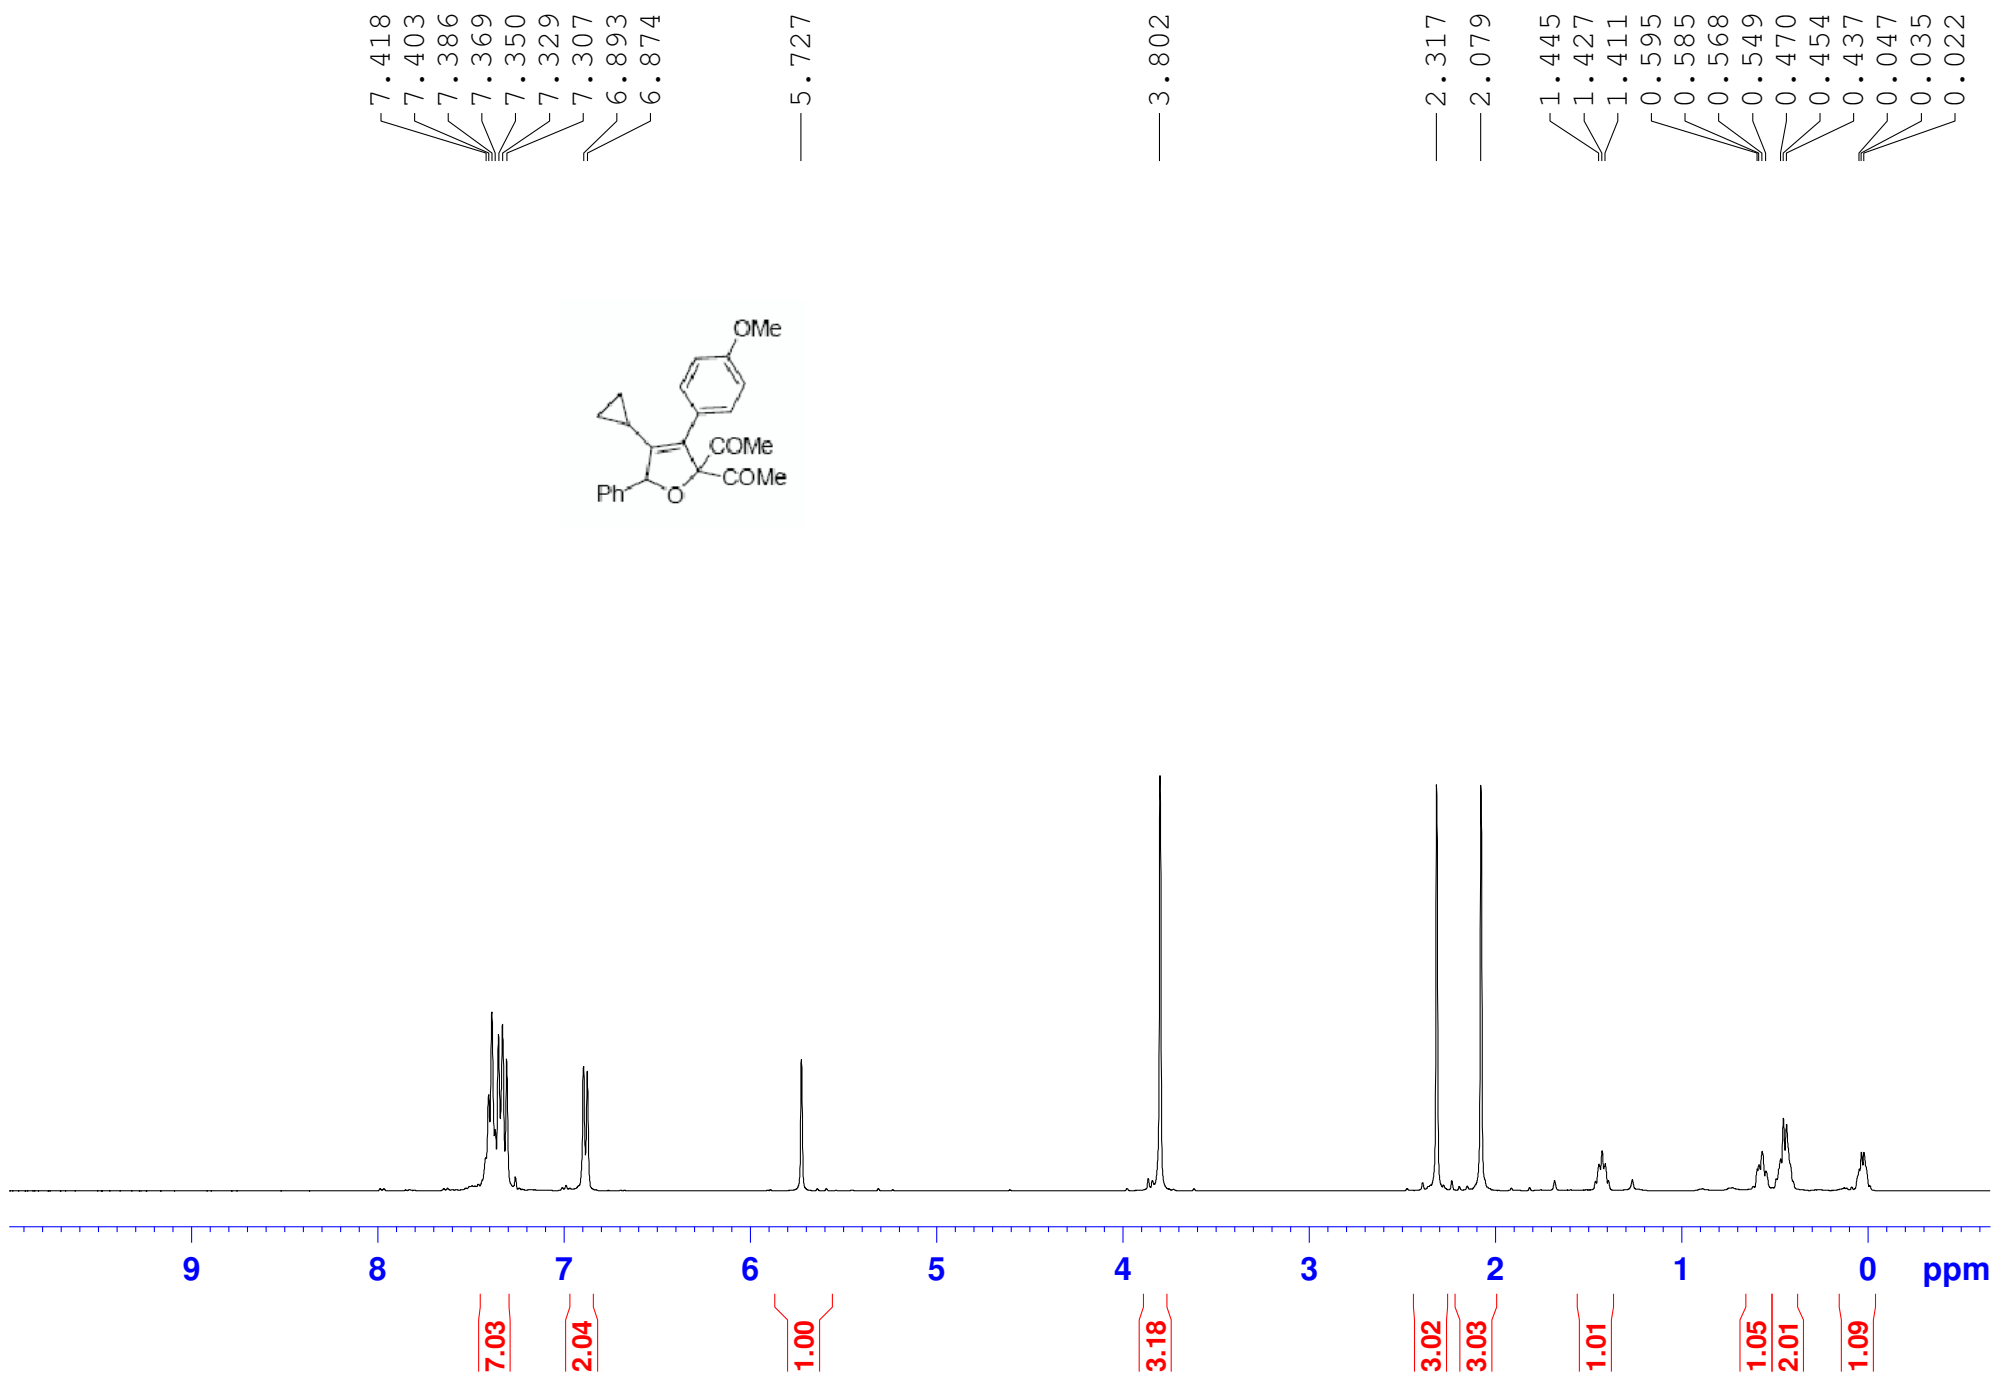

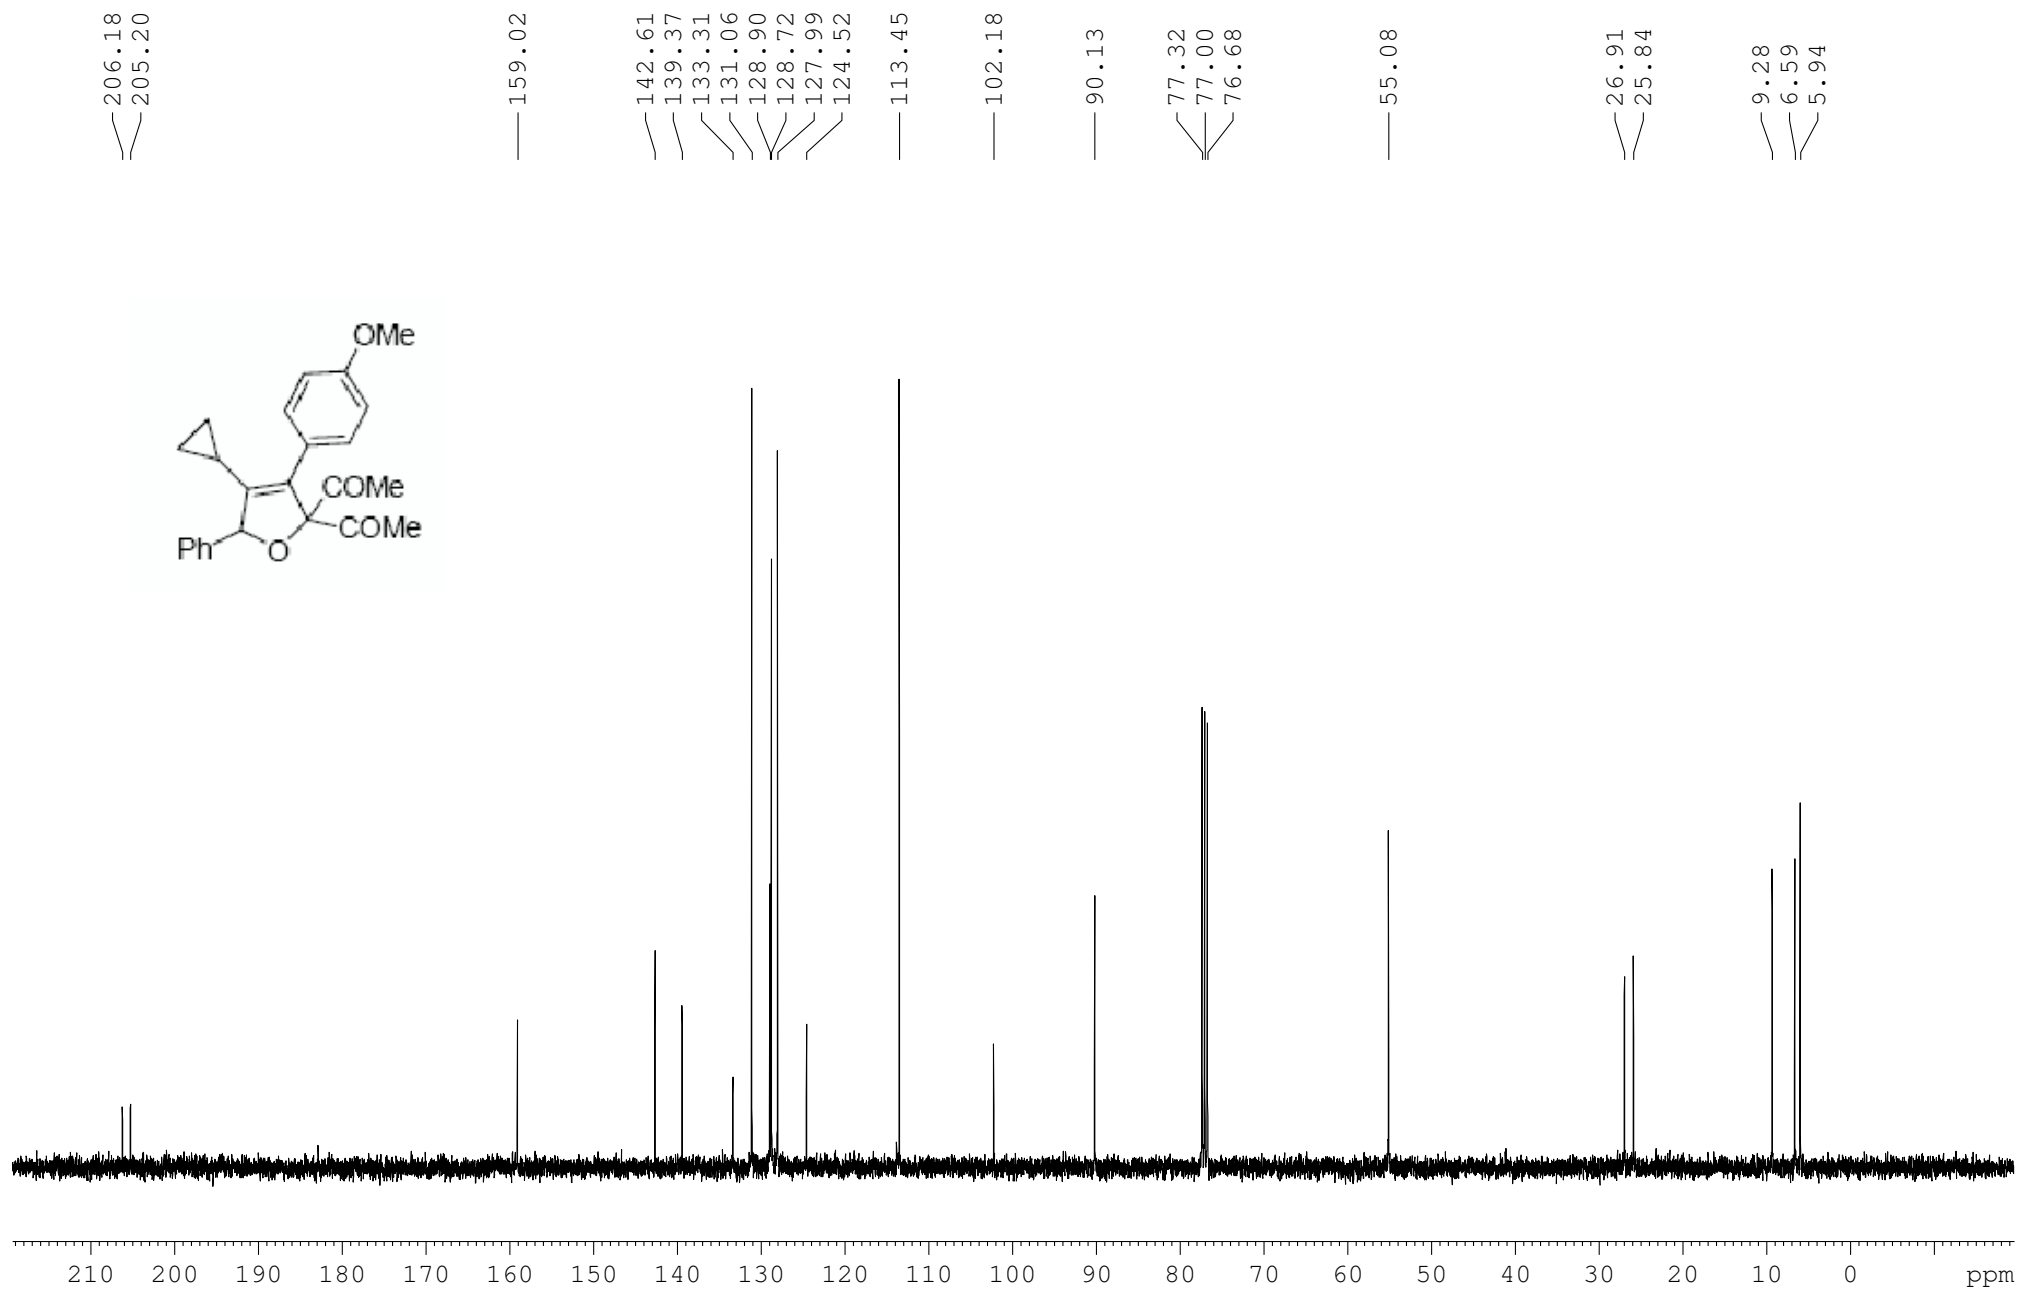

7.382  
7.365  
7.325  
7.308  
7.221  
7.211  
7.056  
6.954  
6.946  
6.403  
6.095

2.322  
2.167

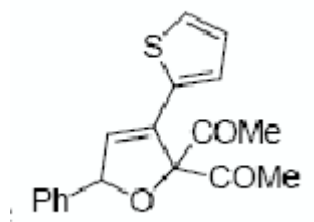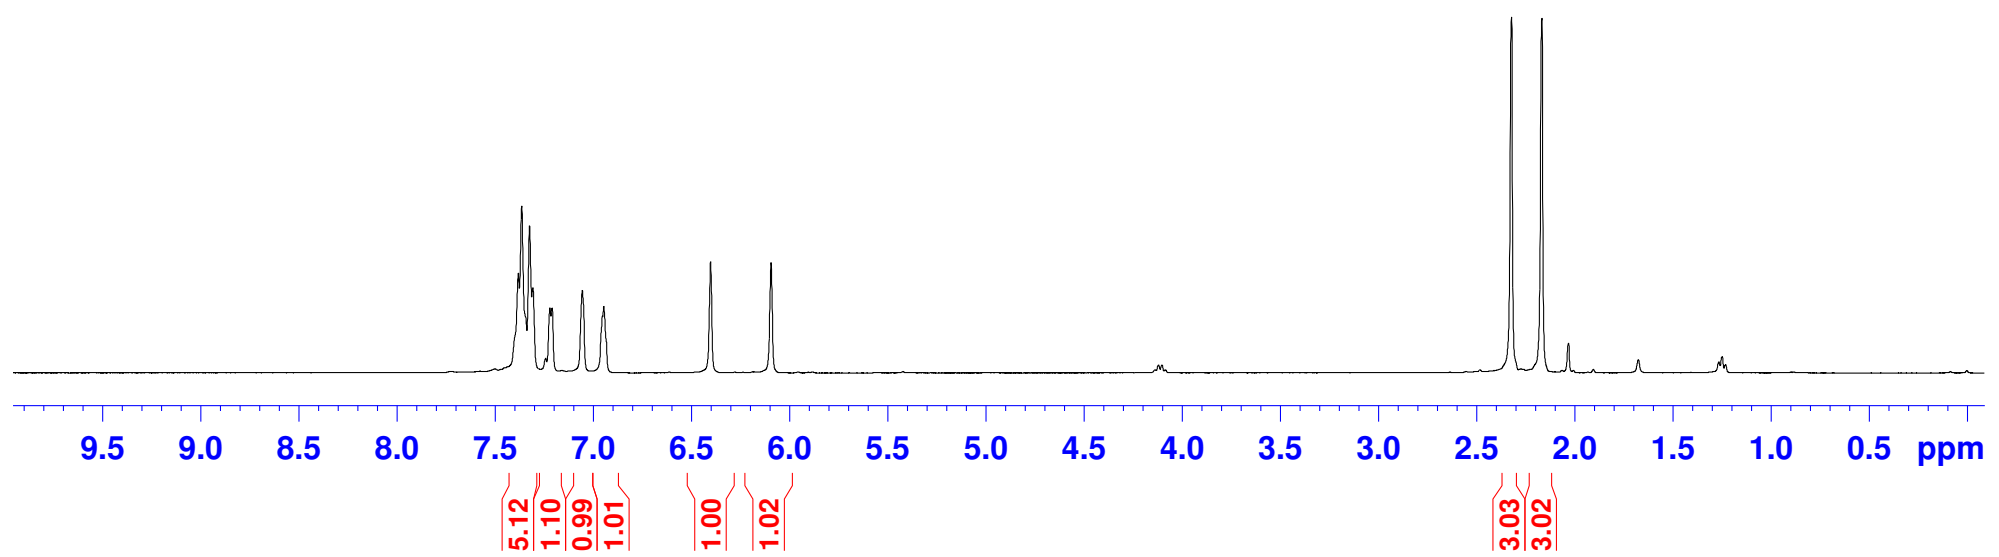

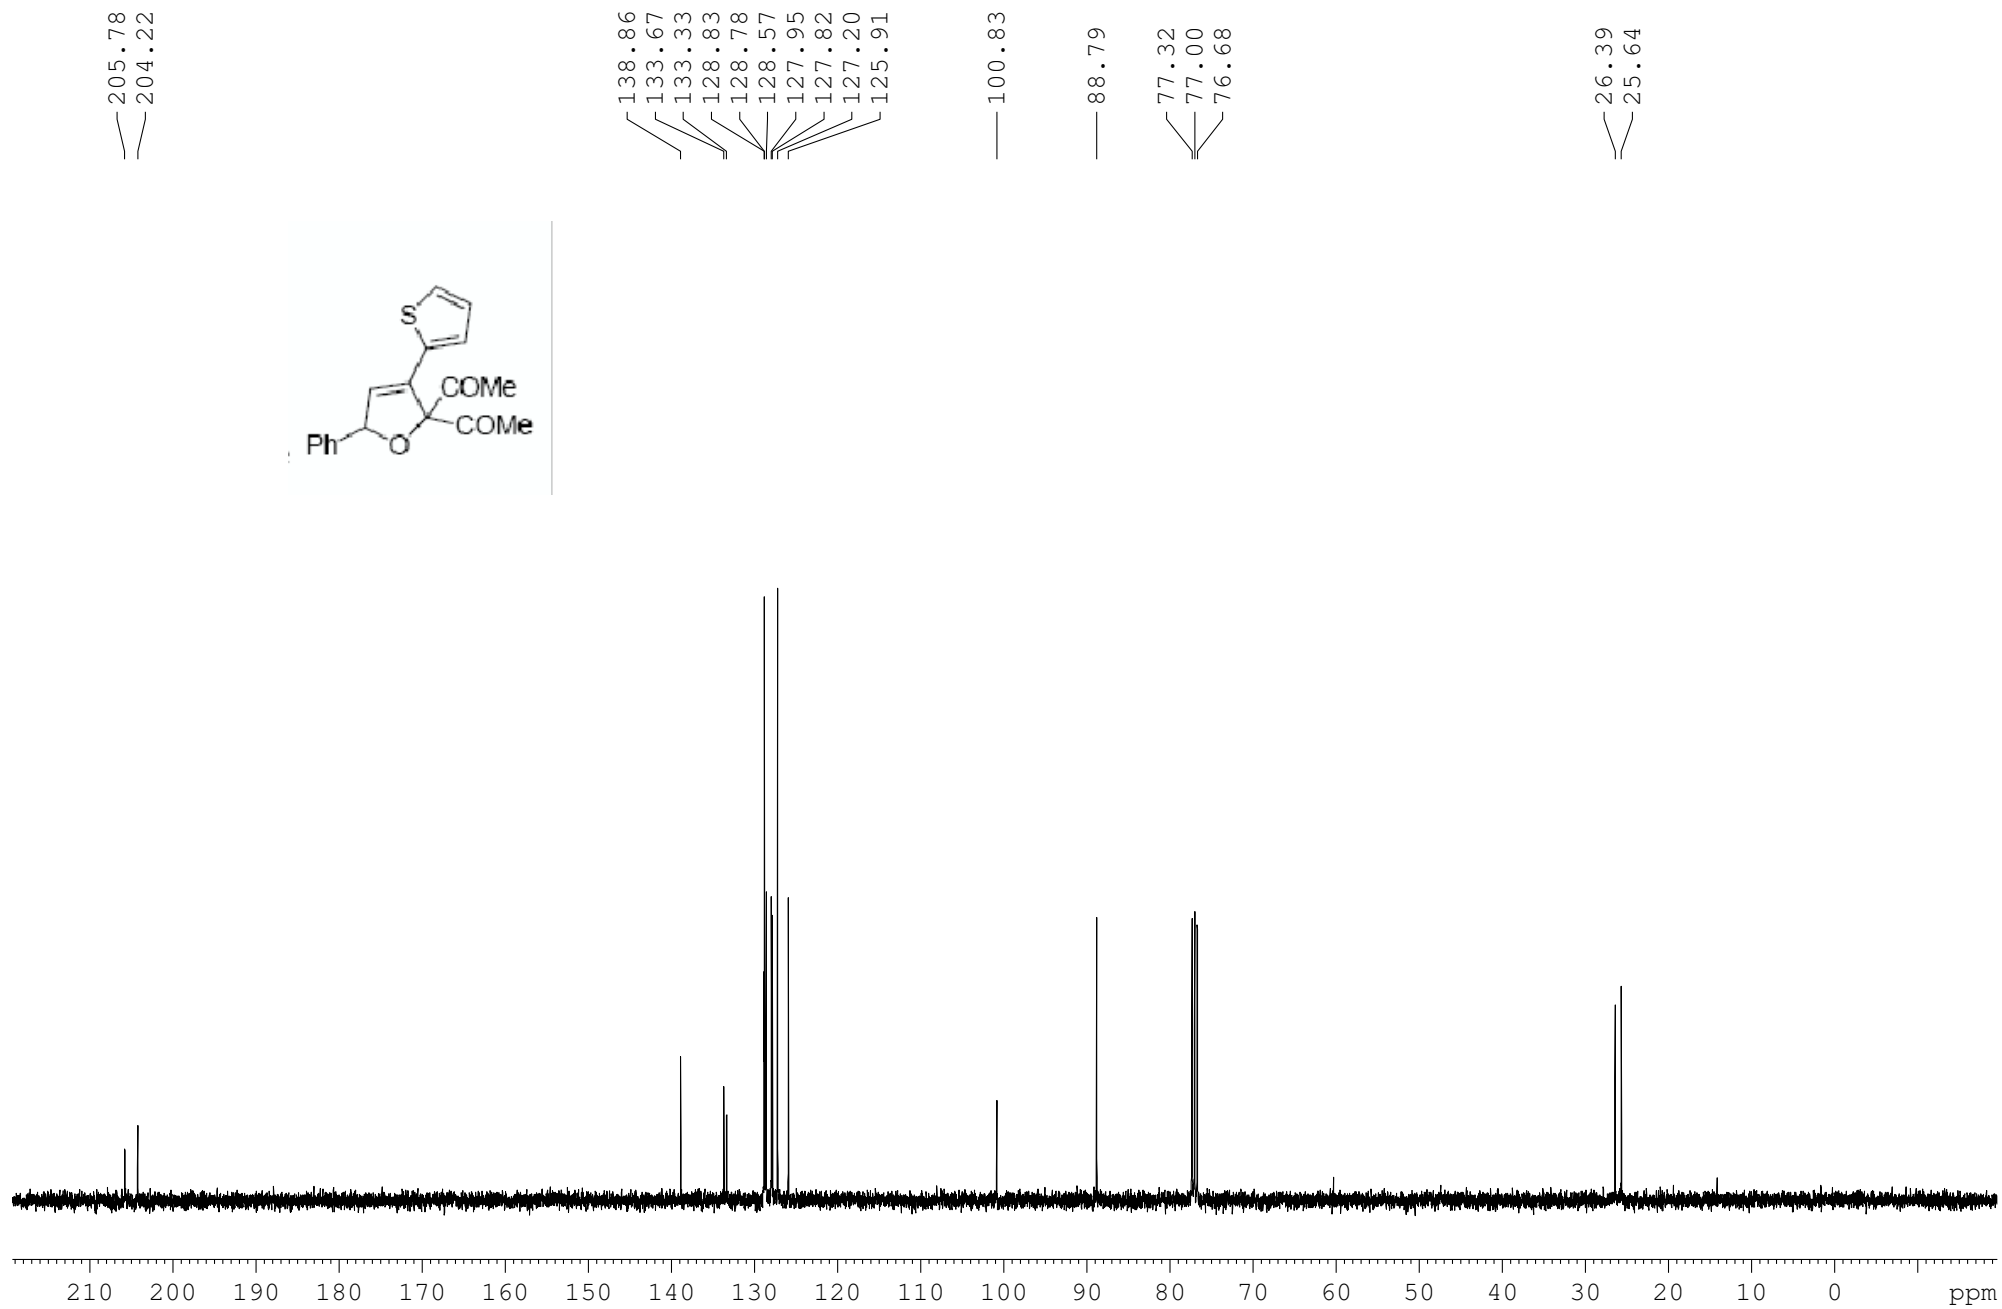

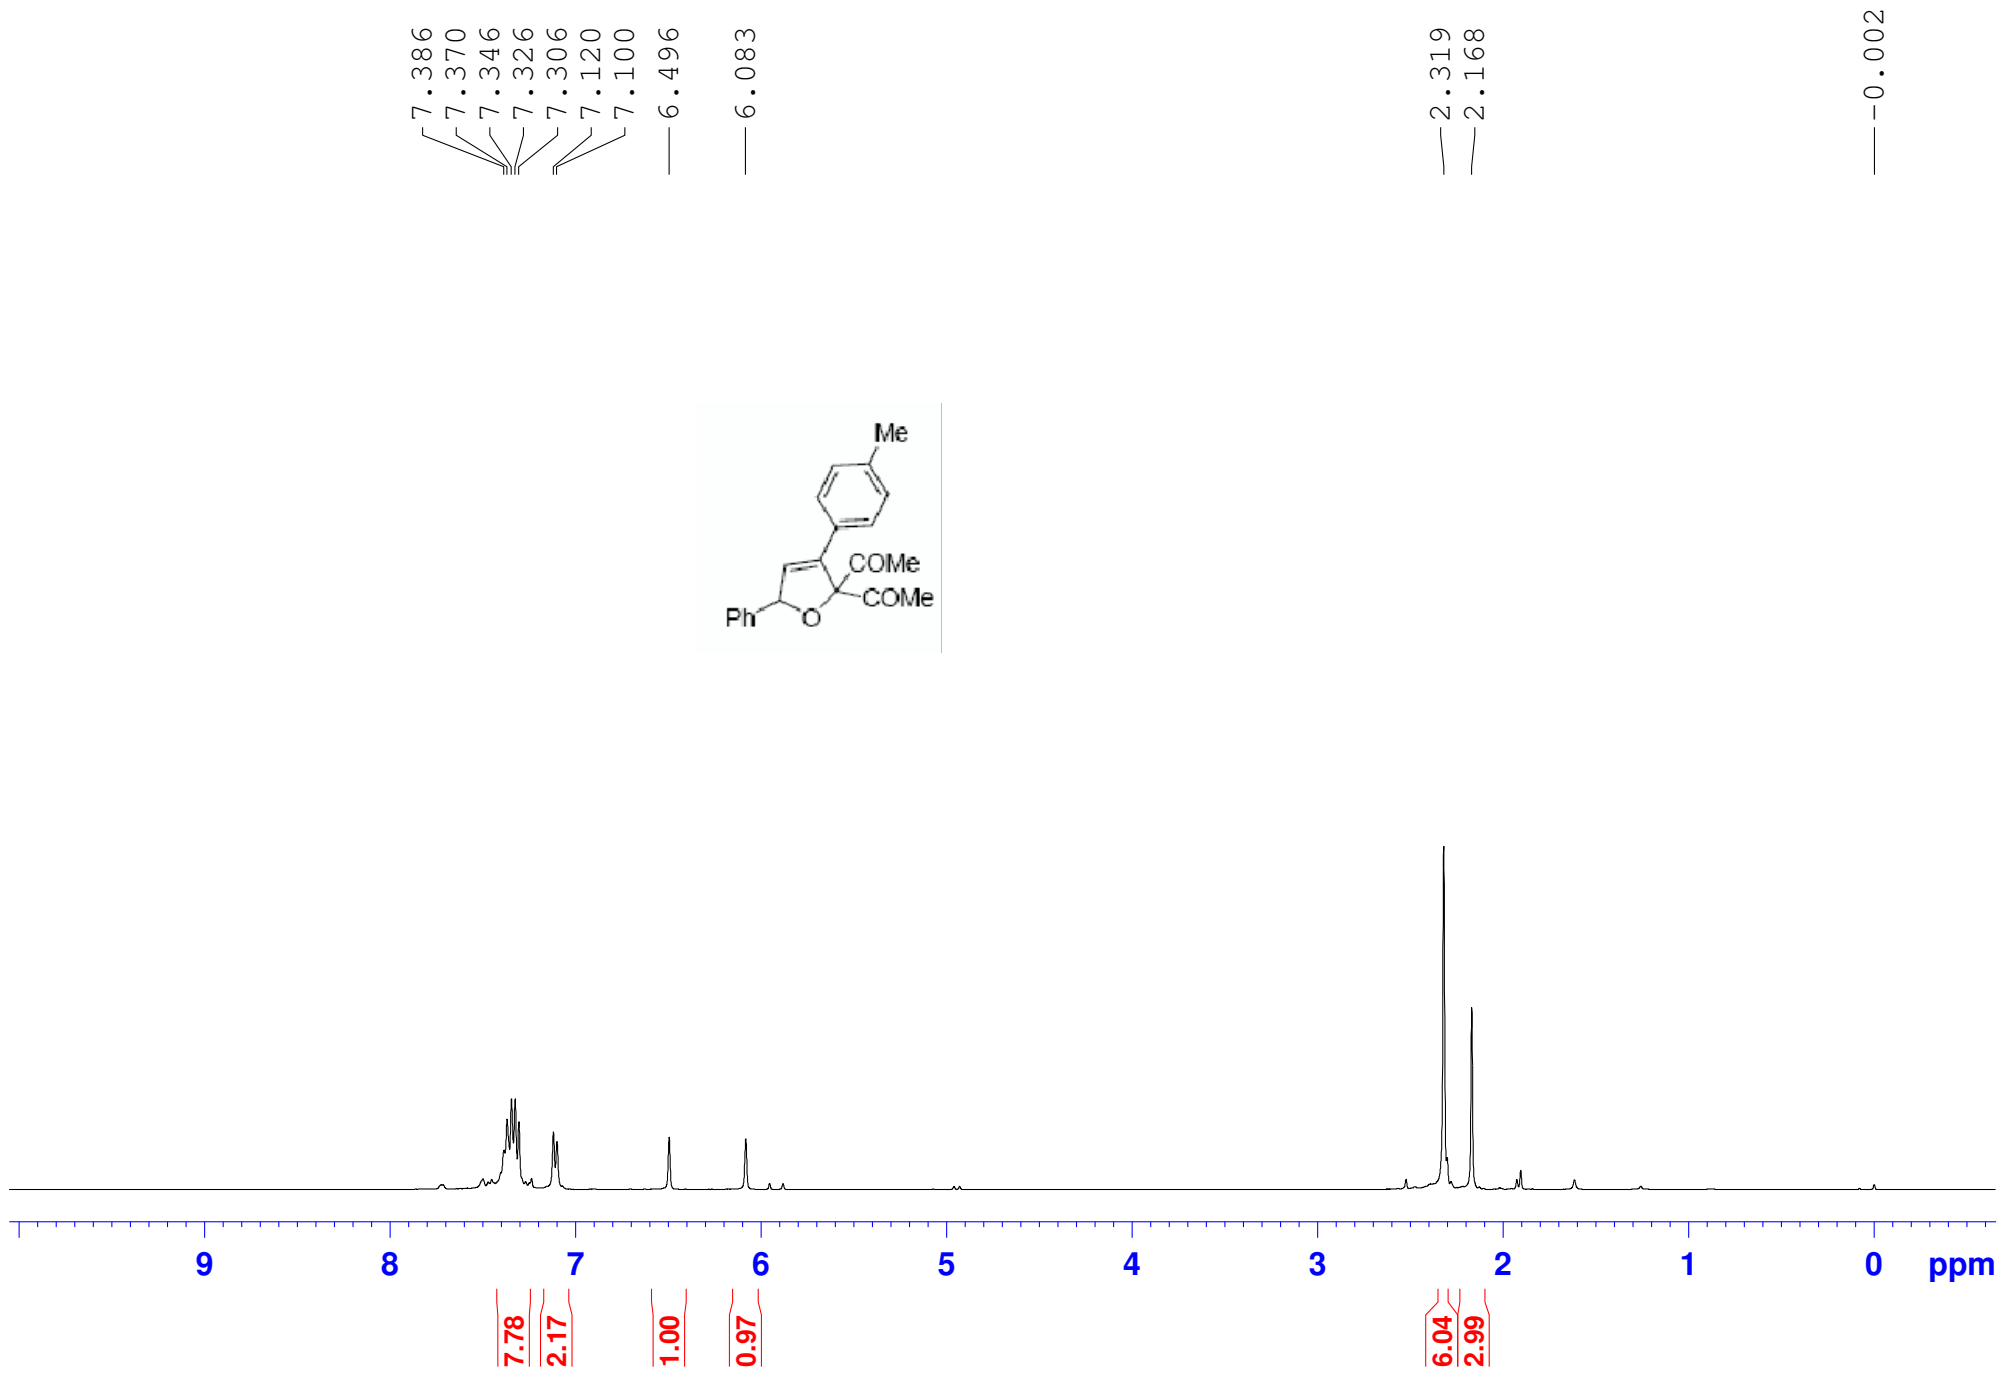

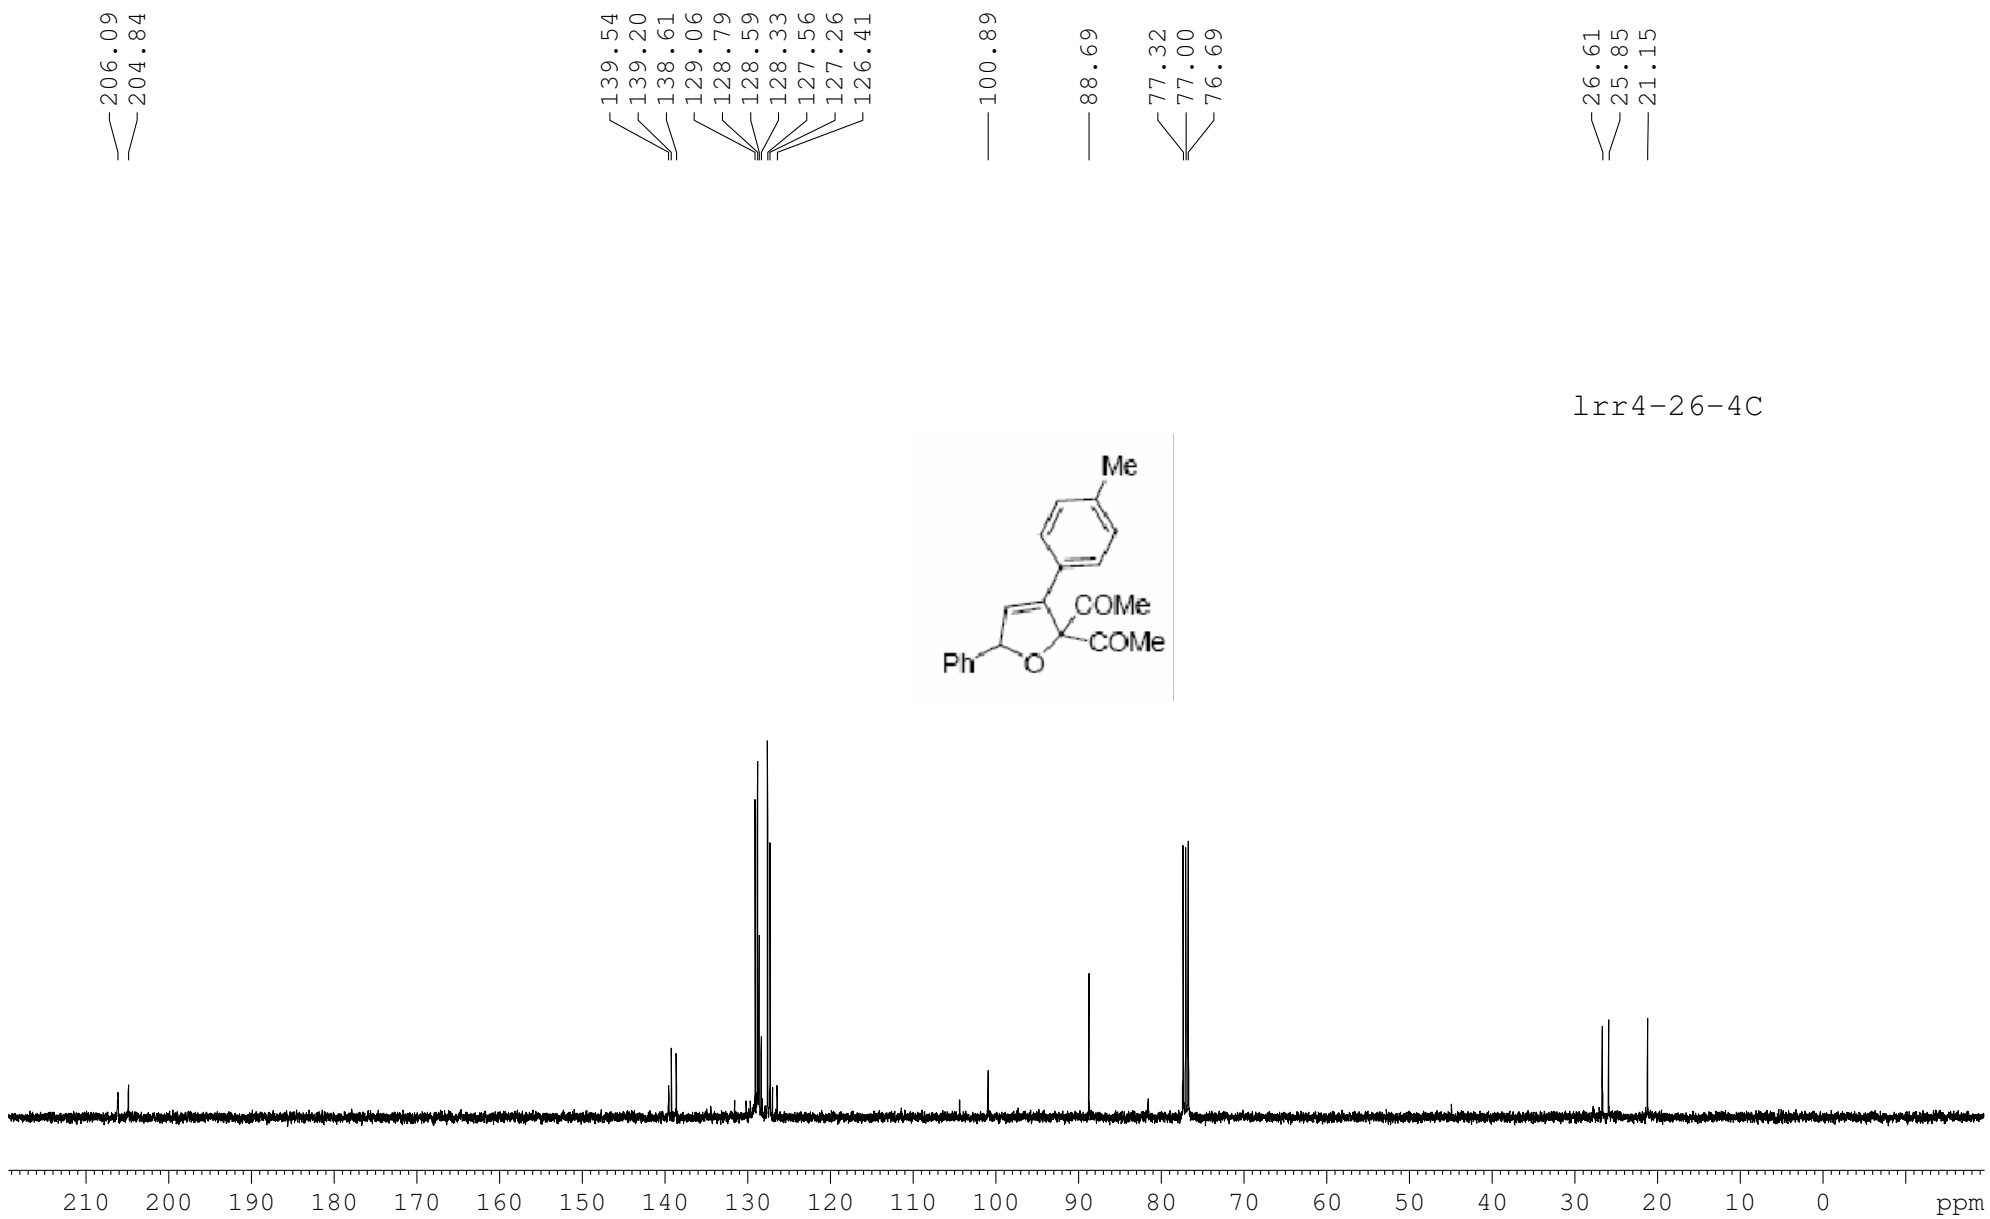

7.441  
7.425  
7.407  
7.384  
7.360  
7.341  
7.162  
7.141  
6.885  
6.864

— 5.898

3.791  
3.355  
3.344  
3.328  
3.311  
3.293  
3.276  
3.266  
2.328  
2.148  
1.985  
1.964  
1.949  
1.941  
1.928  
1.914  
1.906  
1.892  
1.754  
1.739  
1.720  
1.703  
1.685  
1.667  
1.651  
1.635  
1.617  
1.599

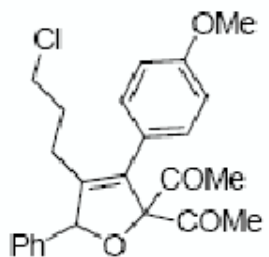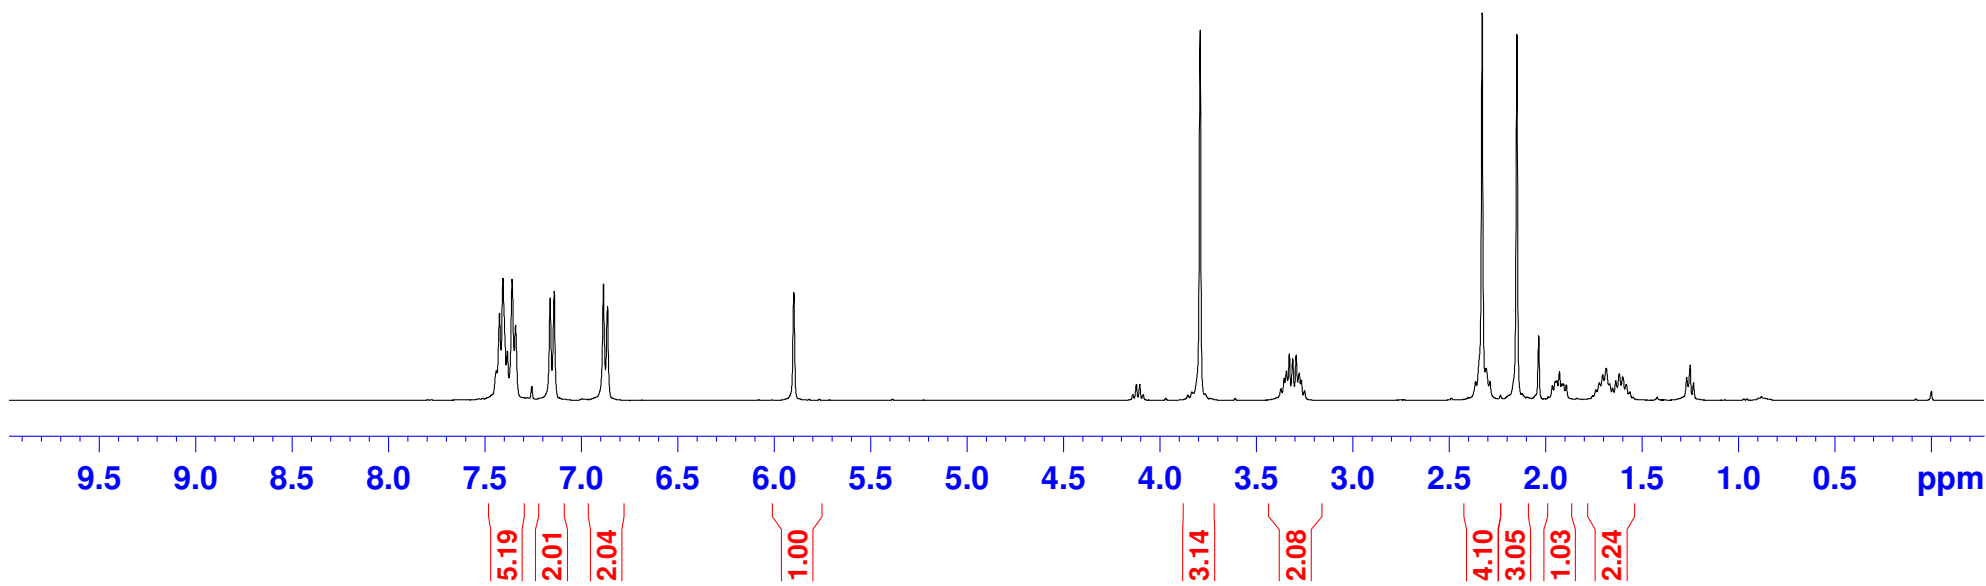

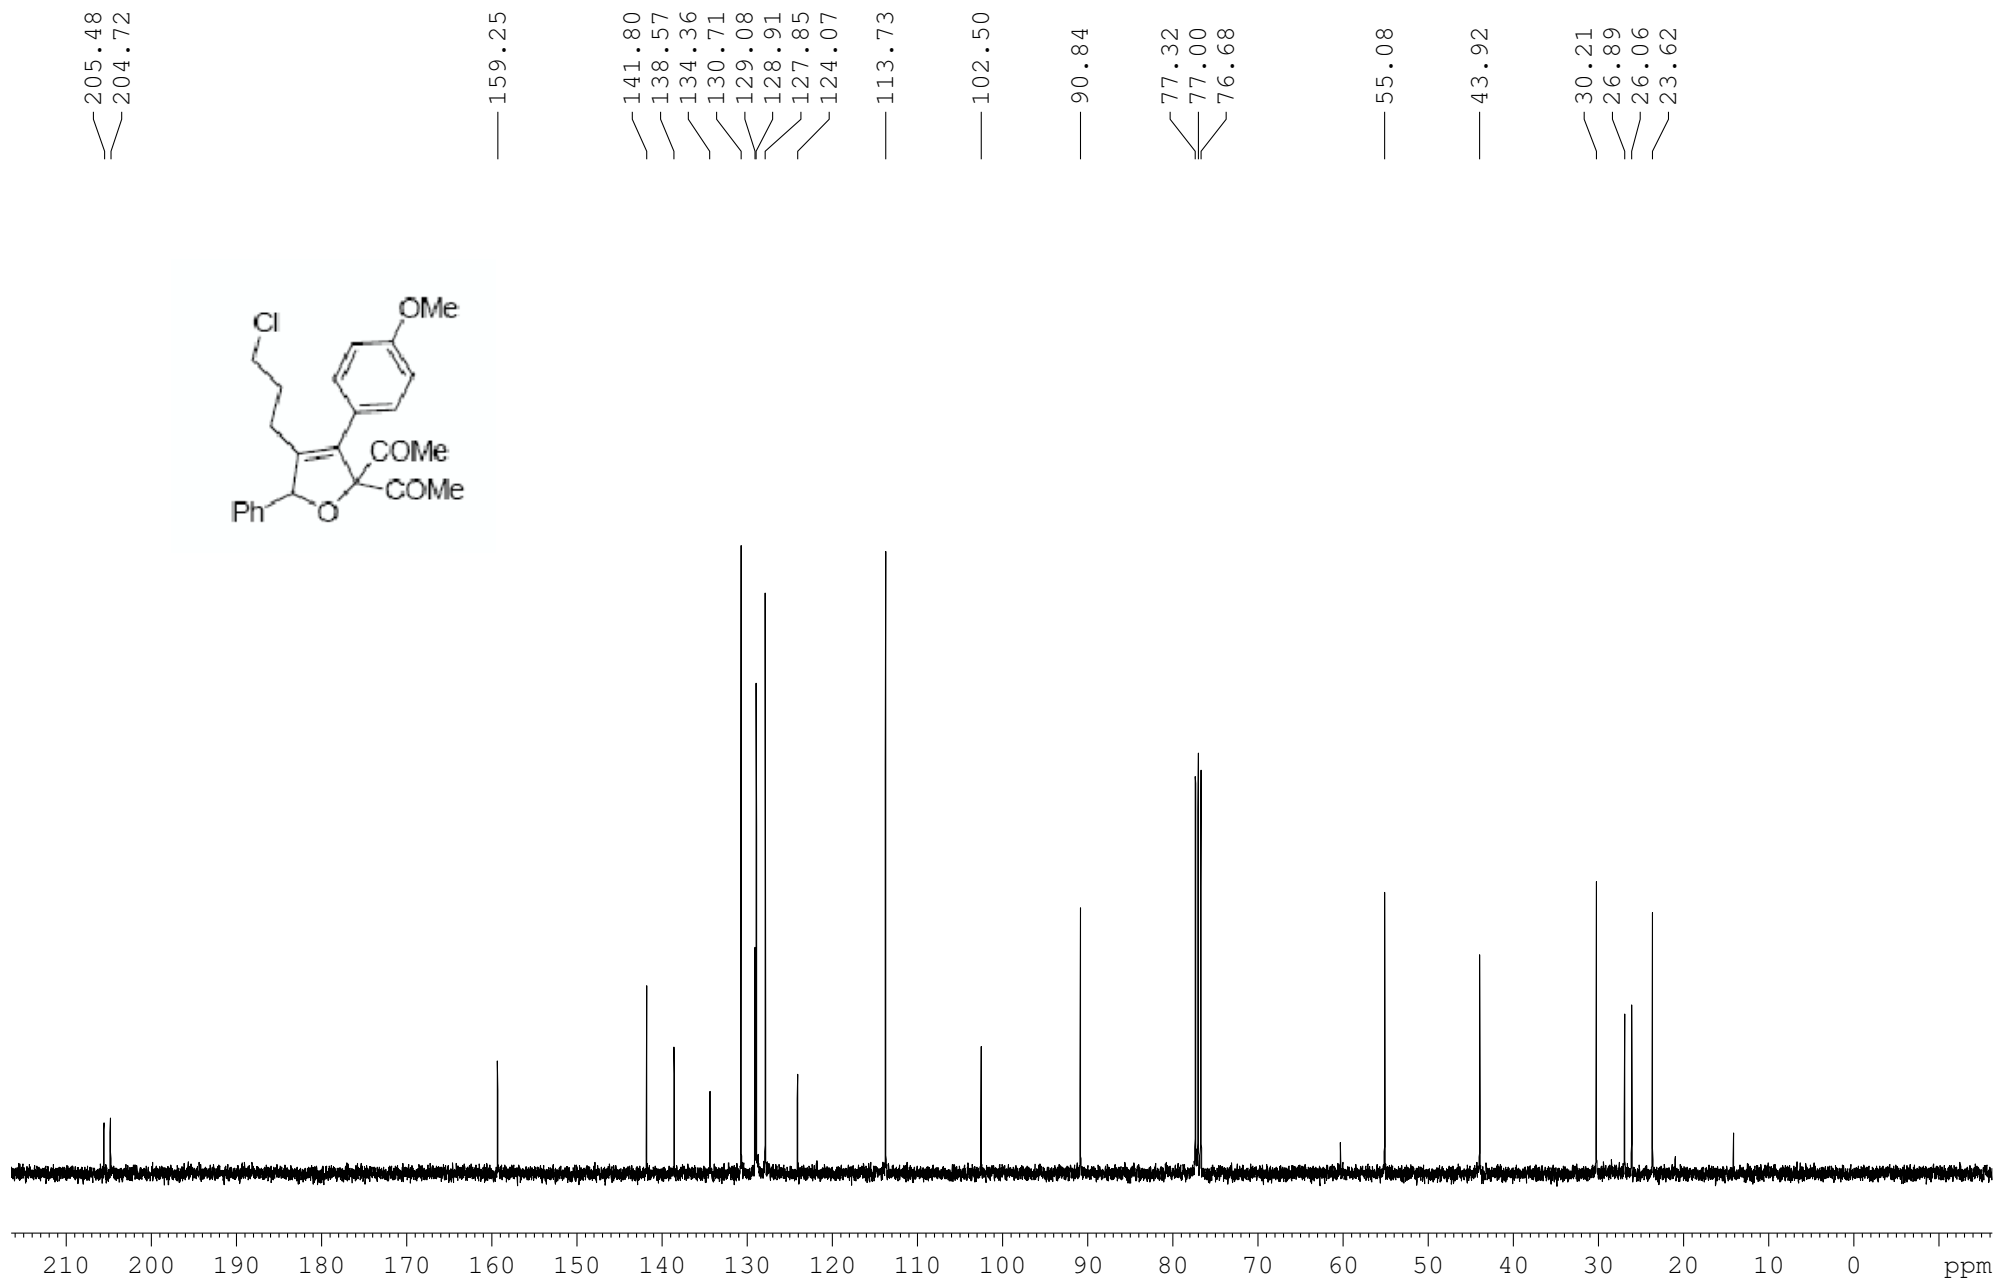



7.324  
7.310  
7.290  
7.214  
7.193  
6.940  
6.920  
6.792  
6.771  
6.601  
6.580  
6.355

3.759  
3.653

2.306  
2.107

-0.003

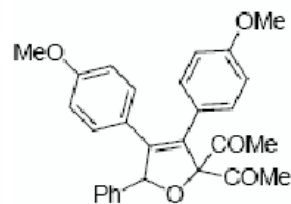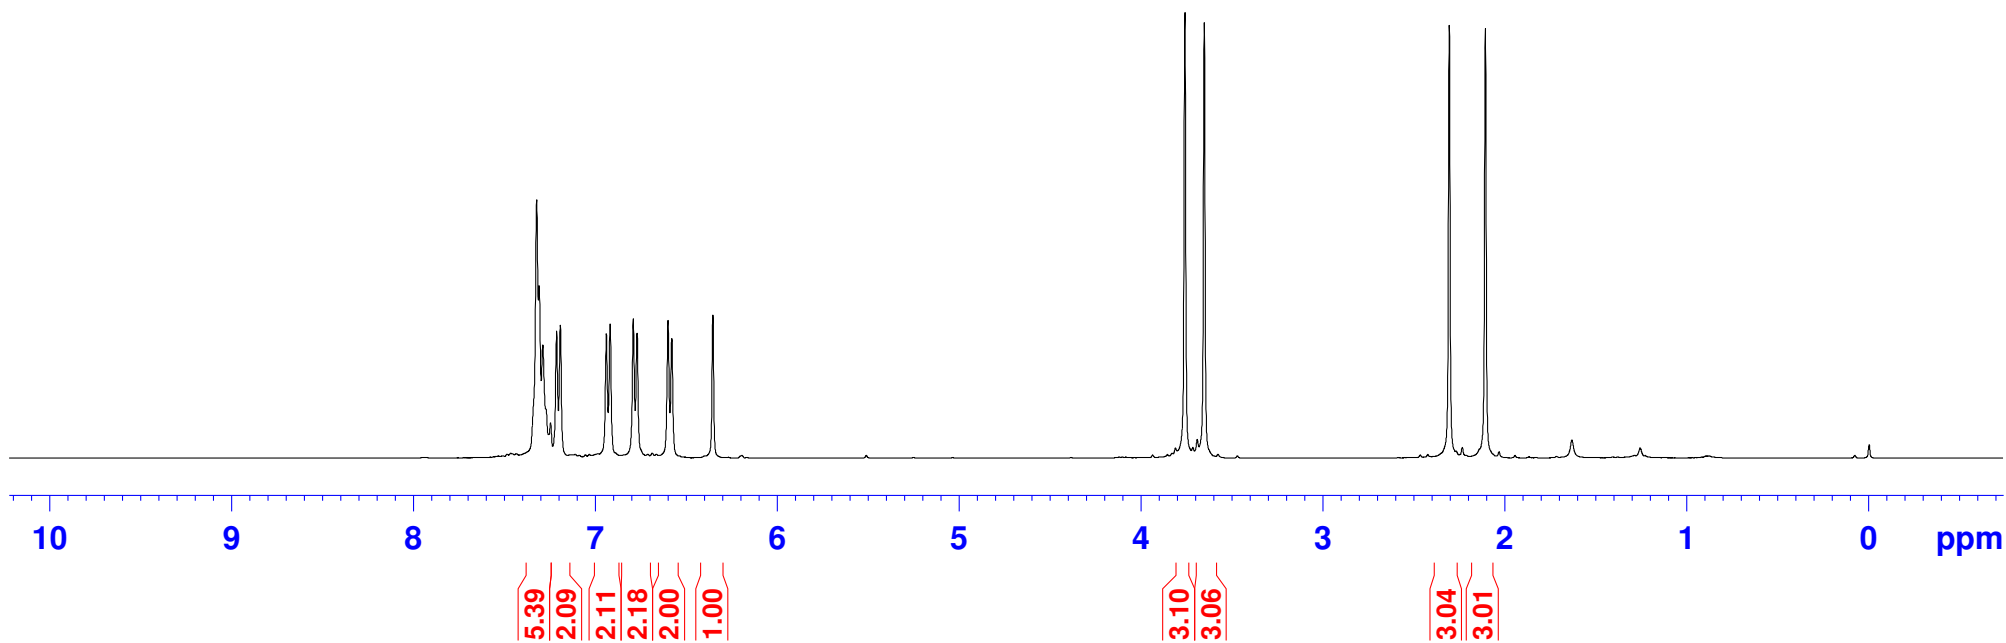

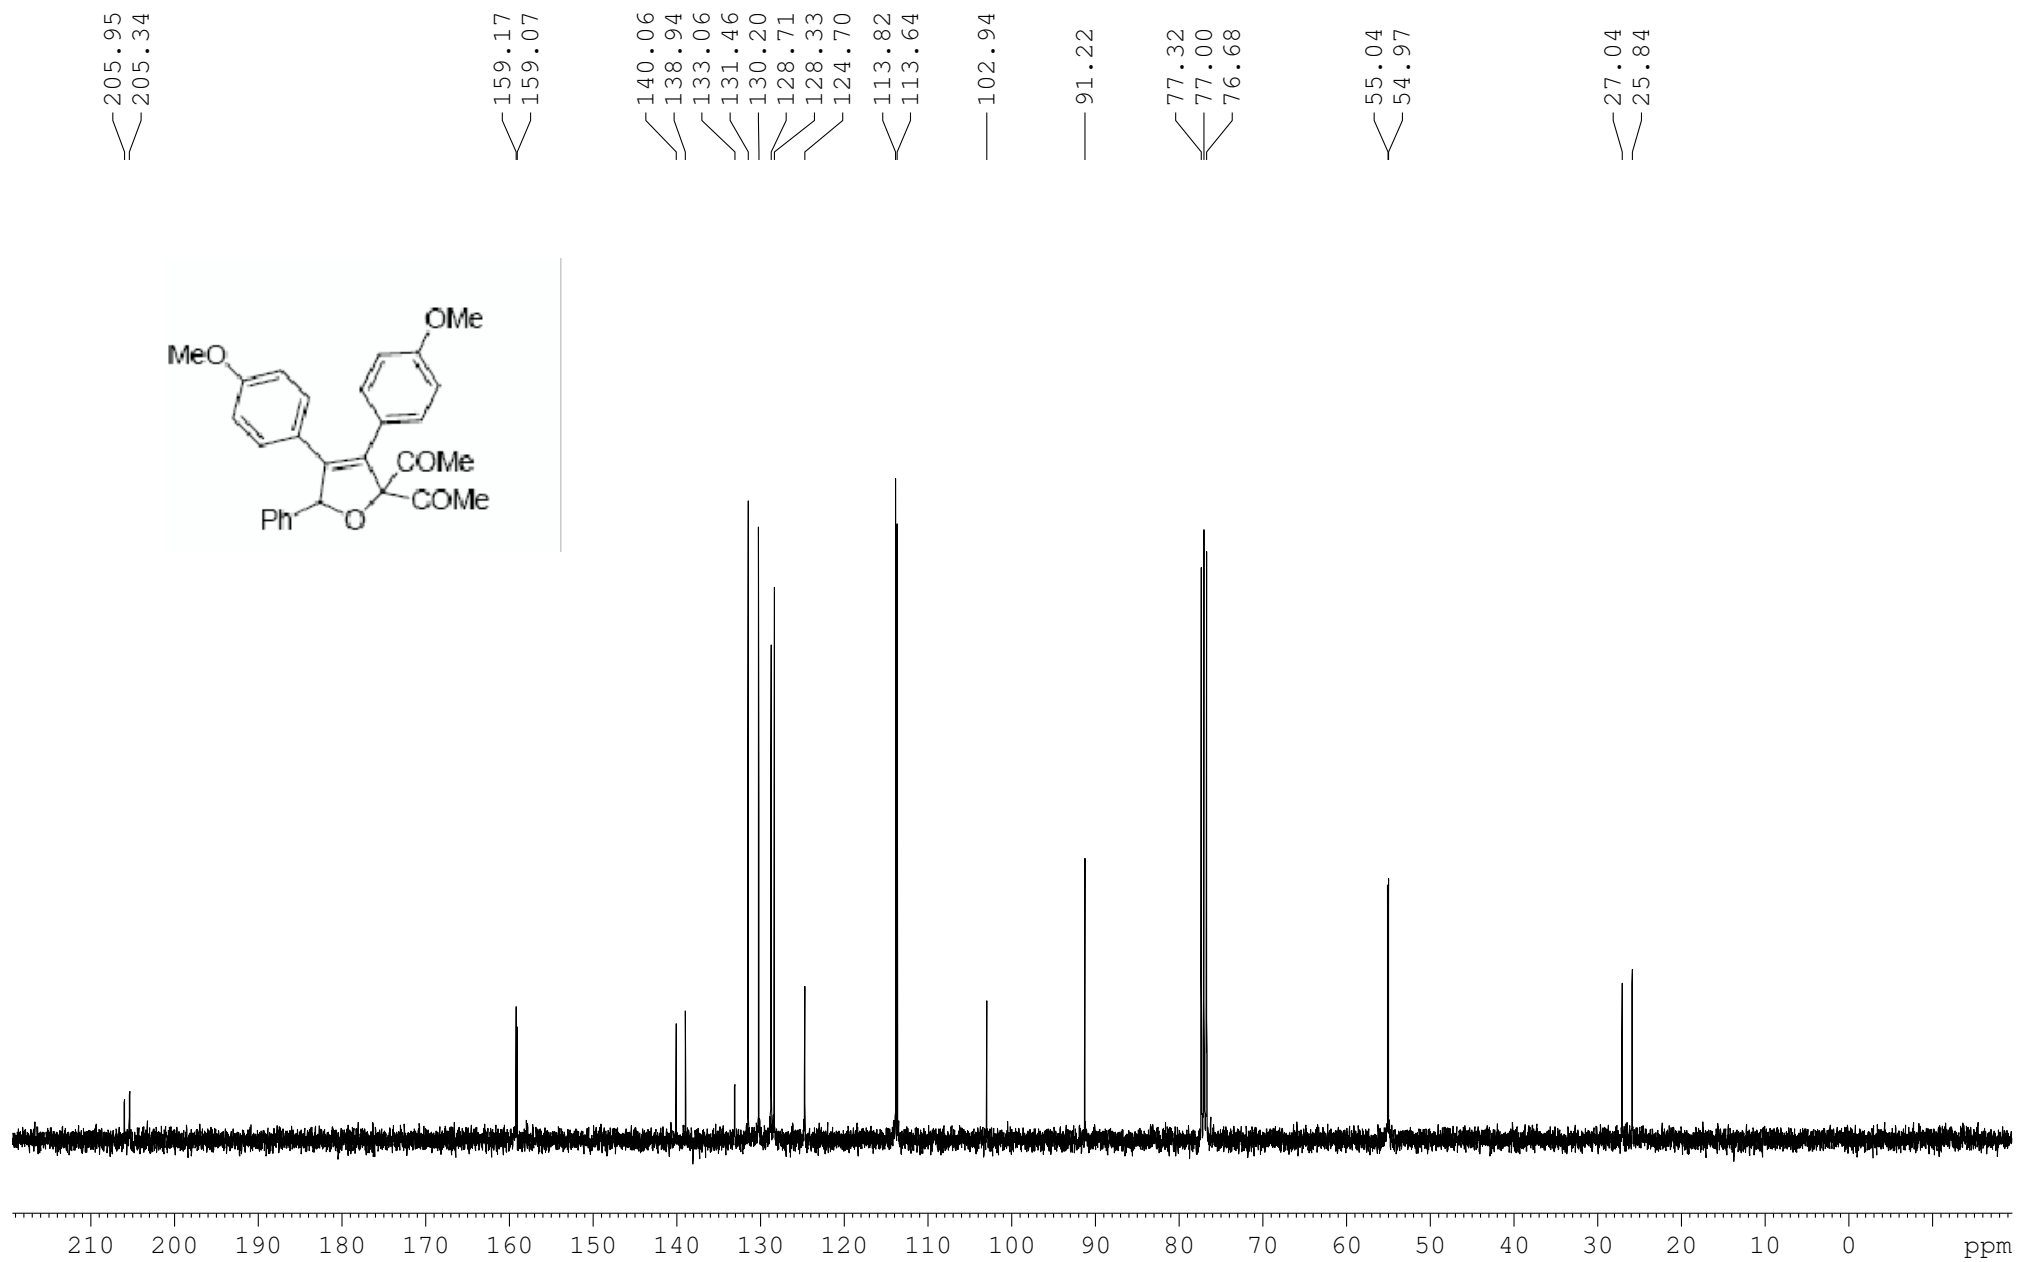

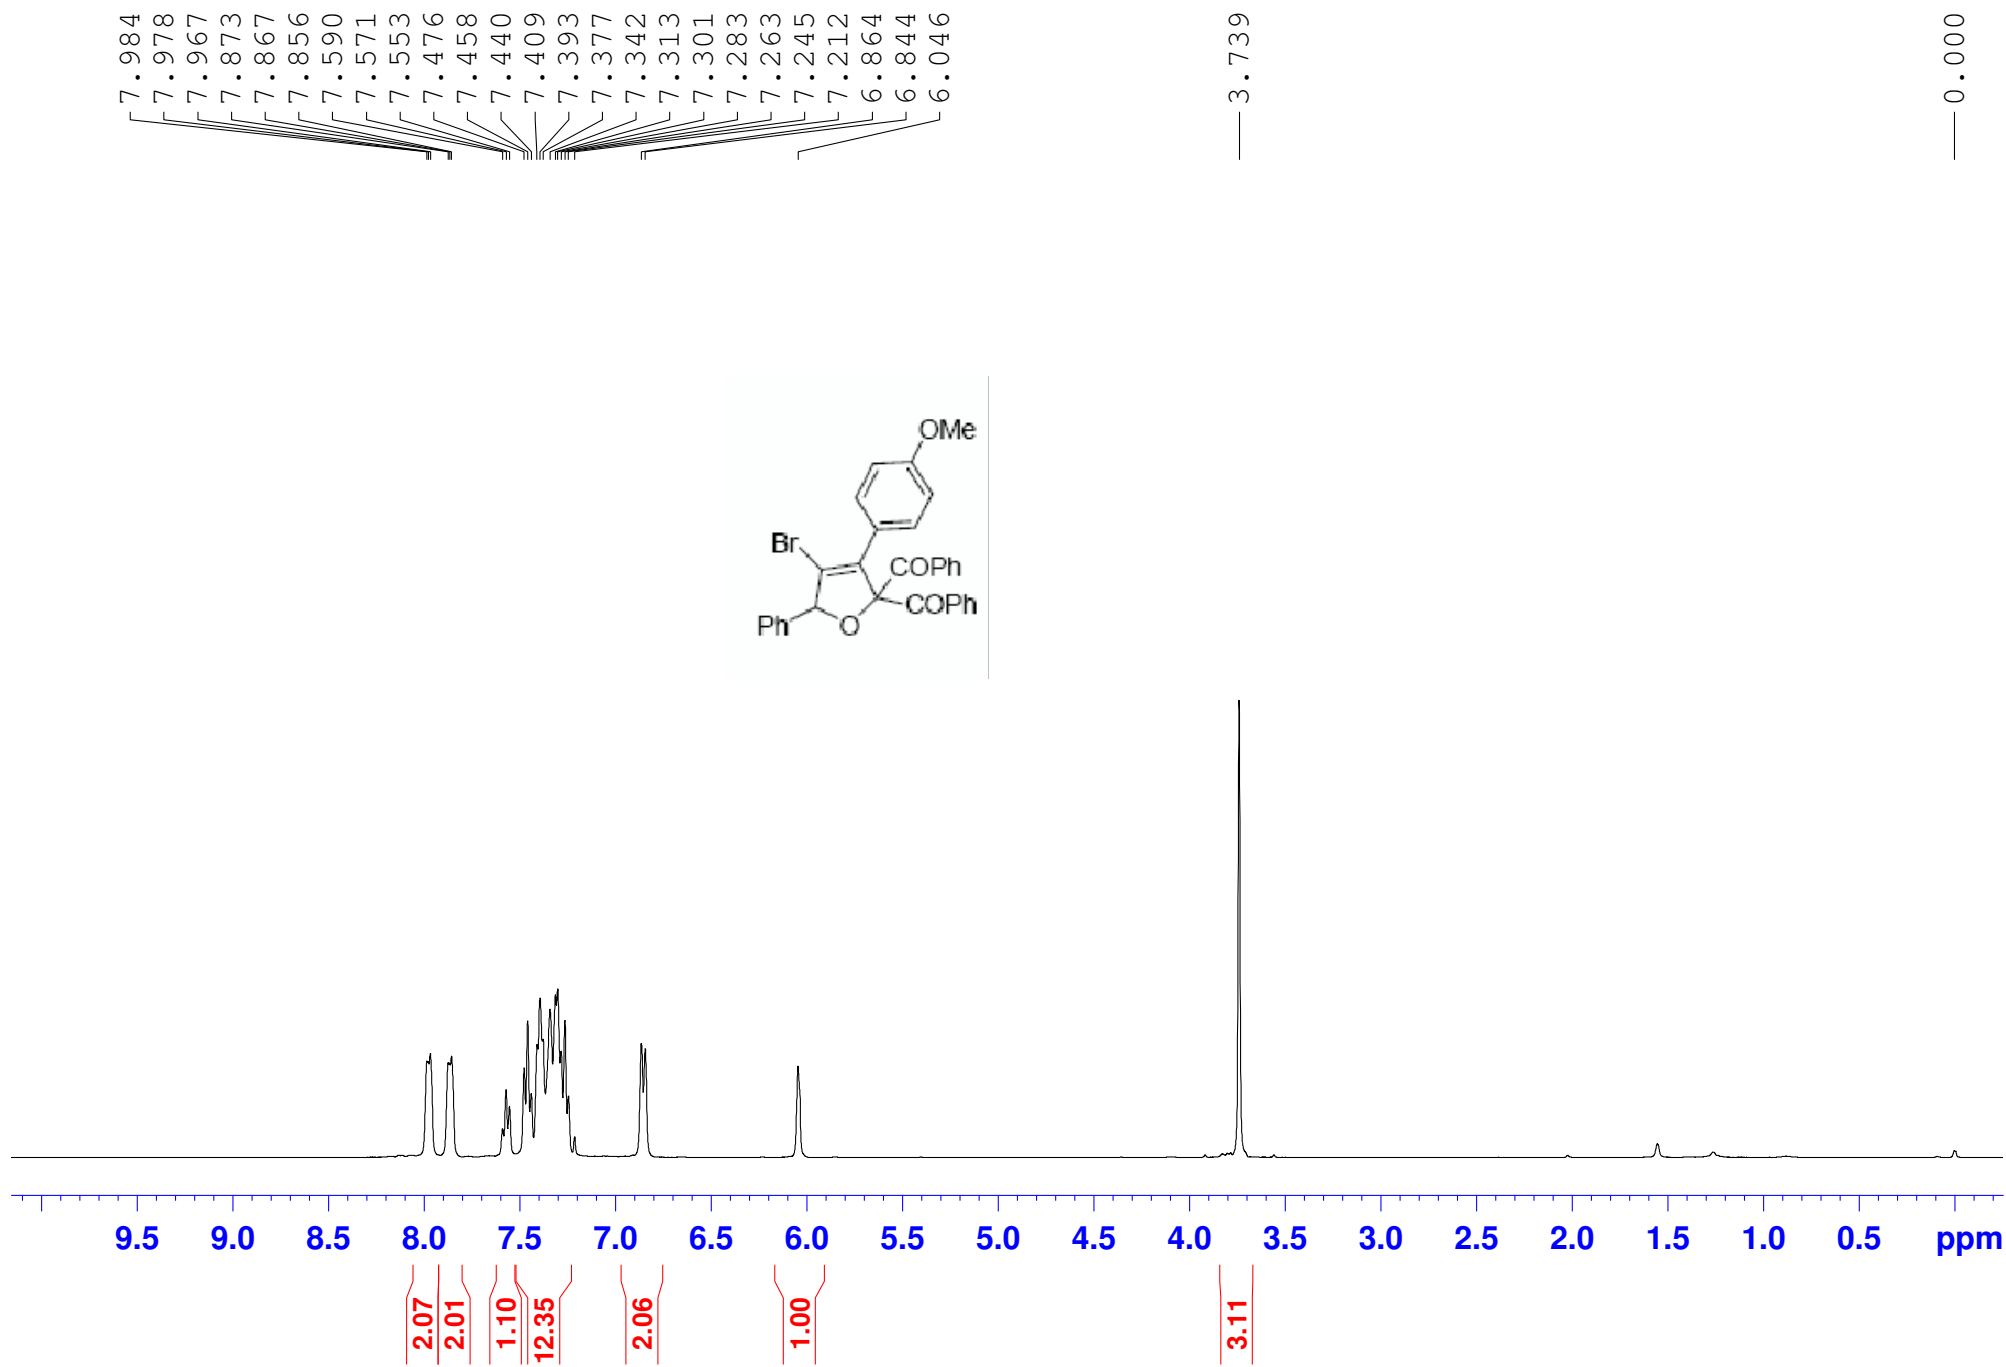

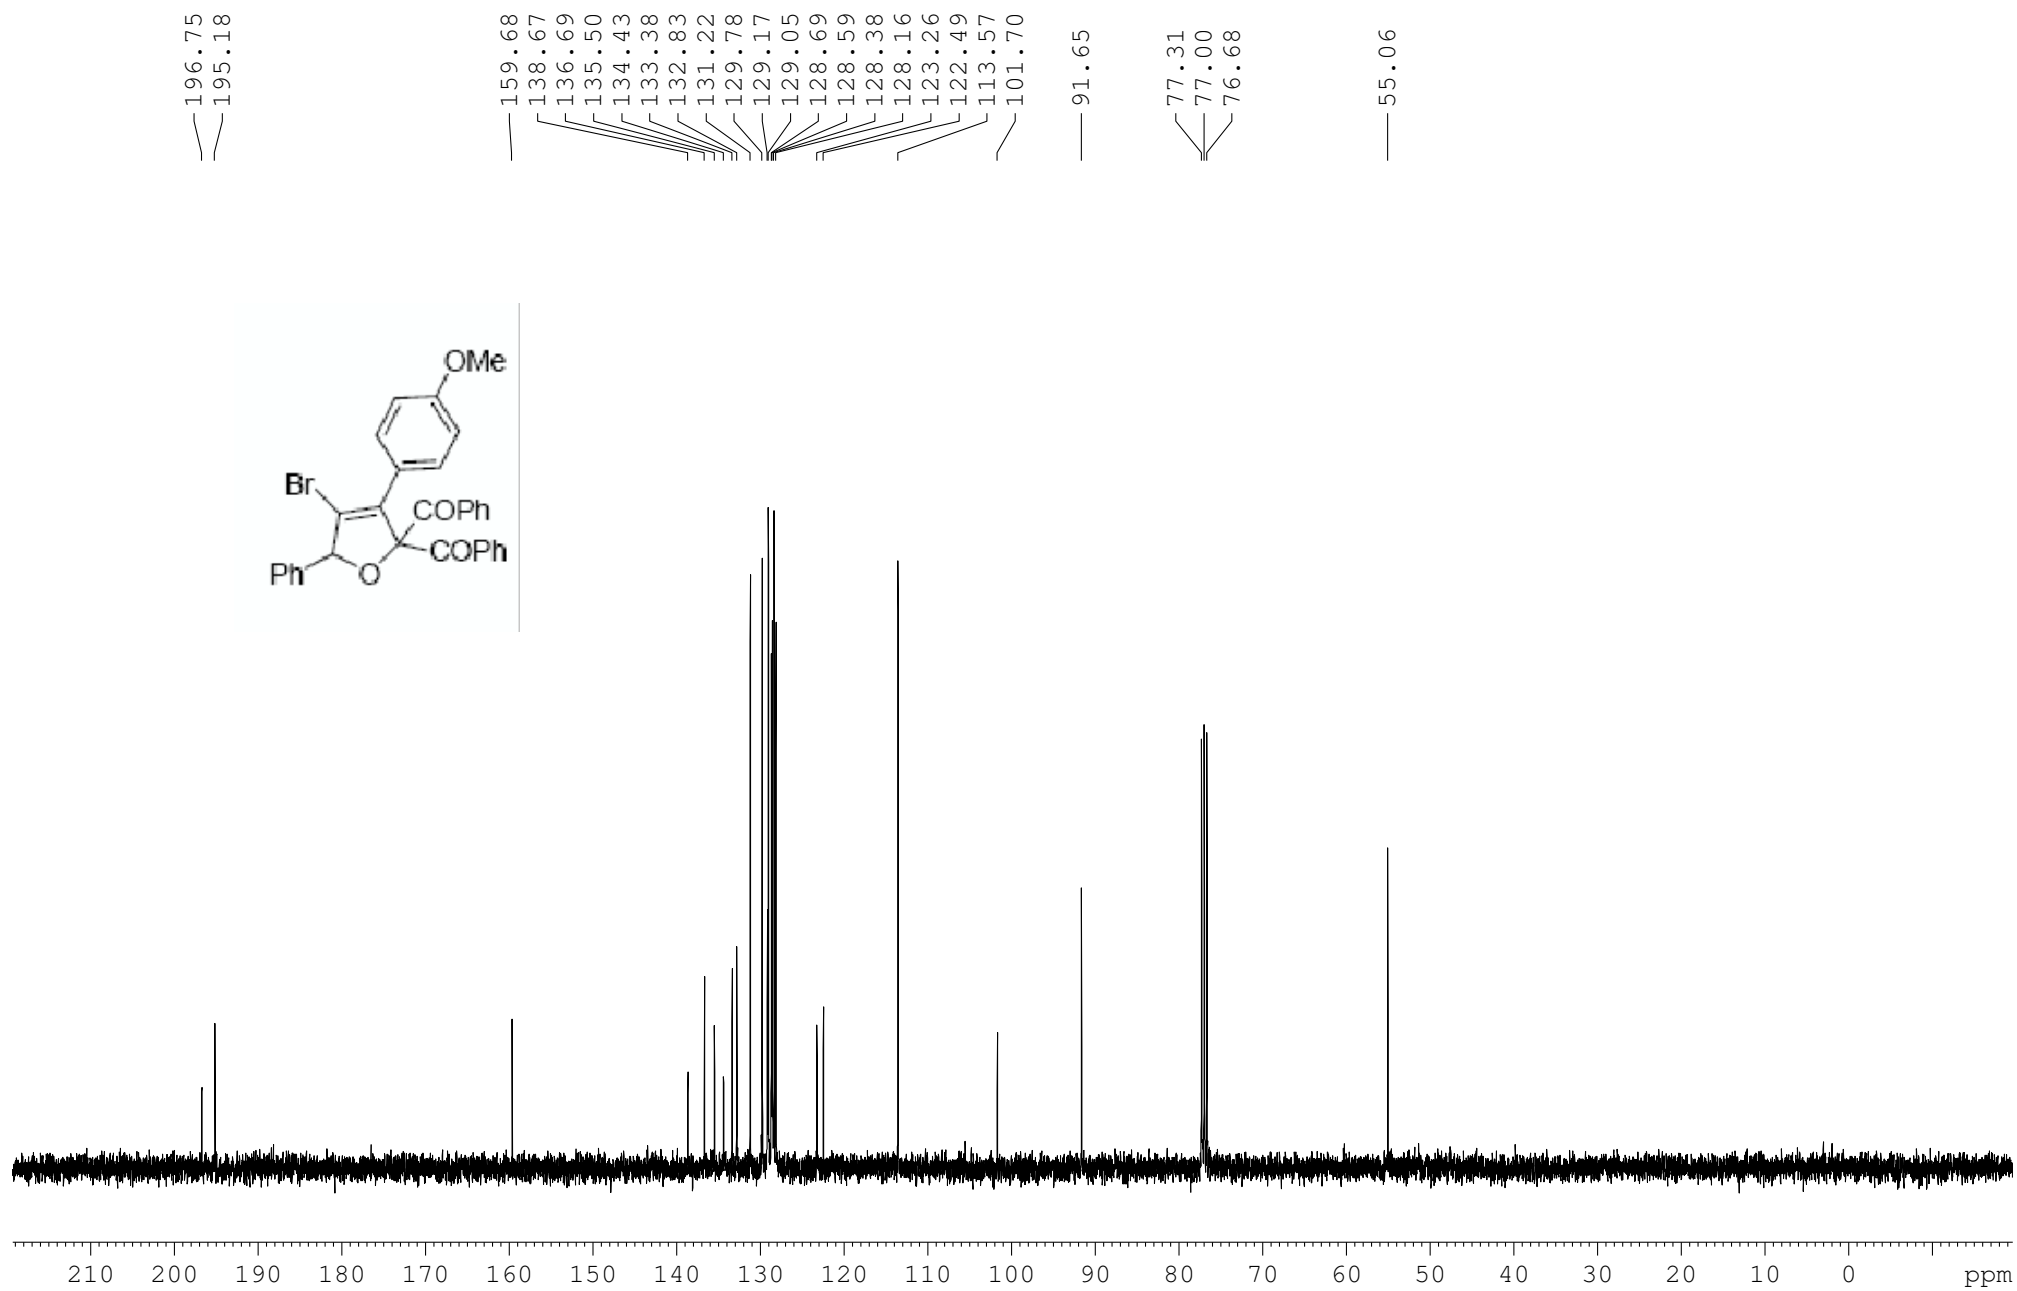

7.381  
7.362  
7.233  
7.213  
7.193  
7.174  
6.835  
6.817  
6.406  
— 6.043

— 3.776

2.352  
2.307  
2.157

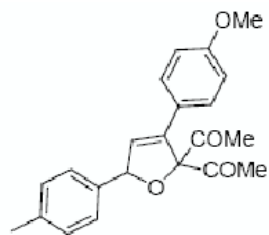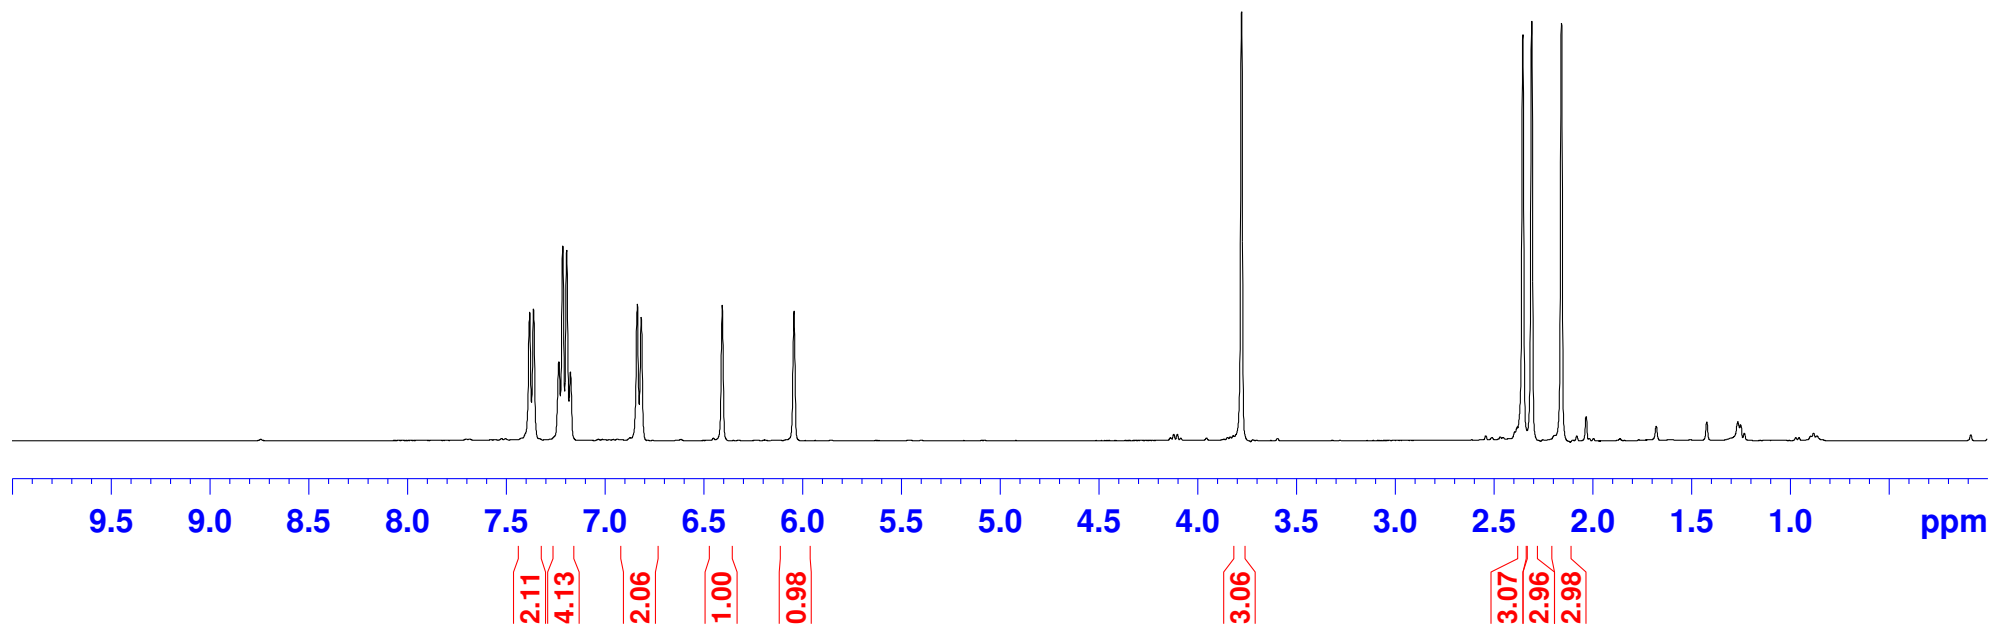

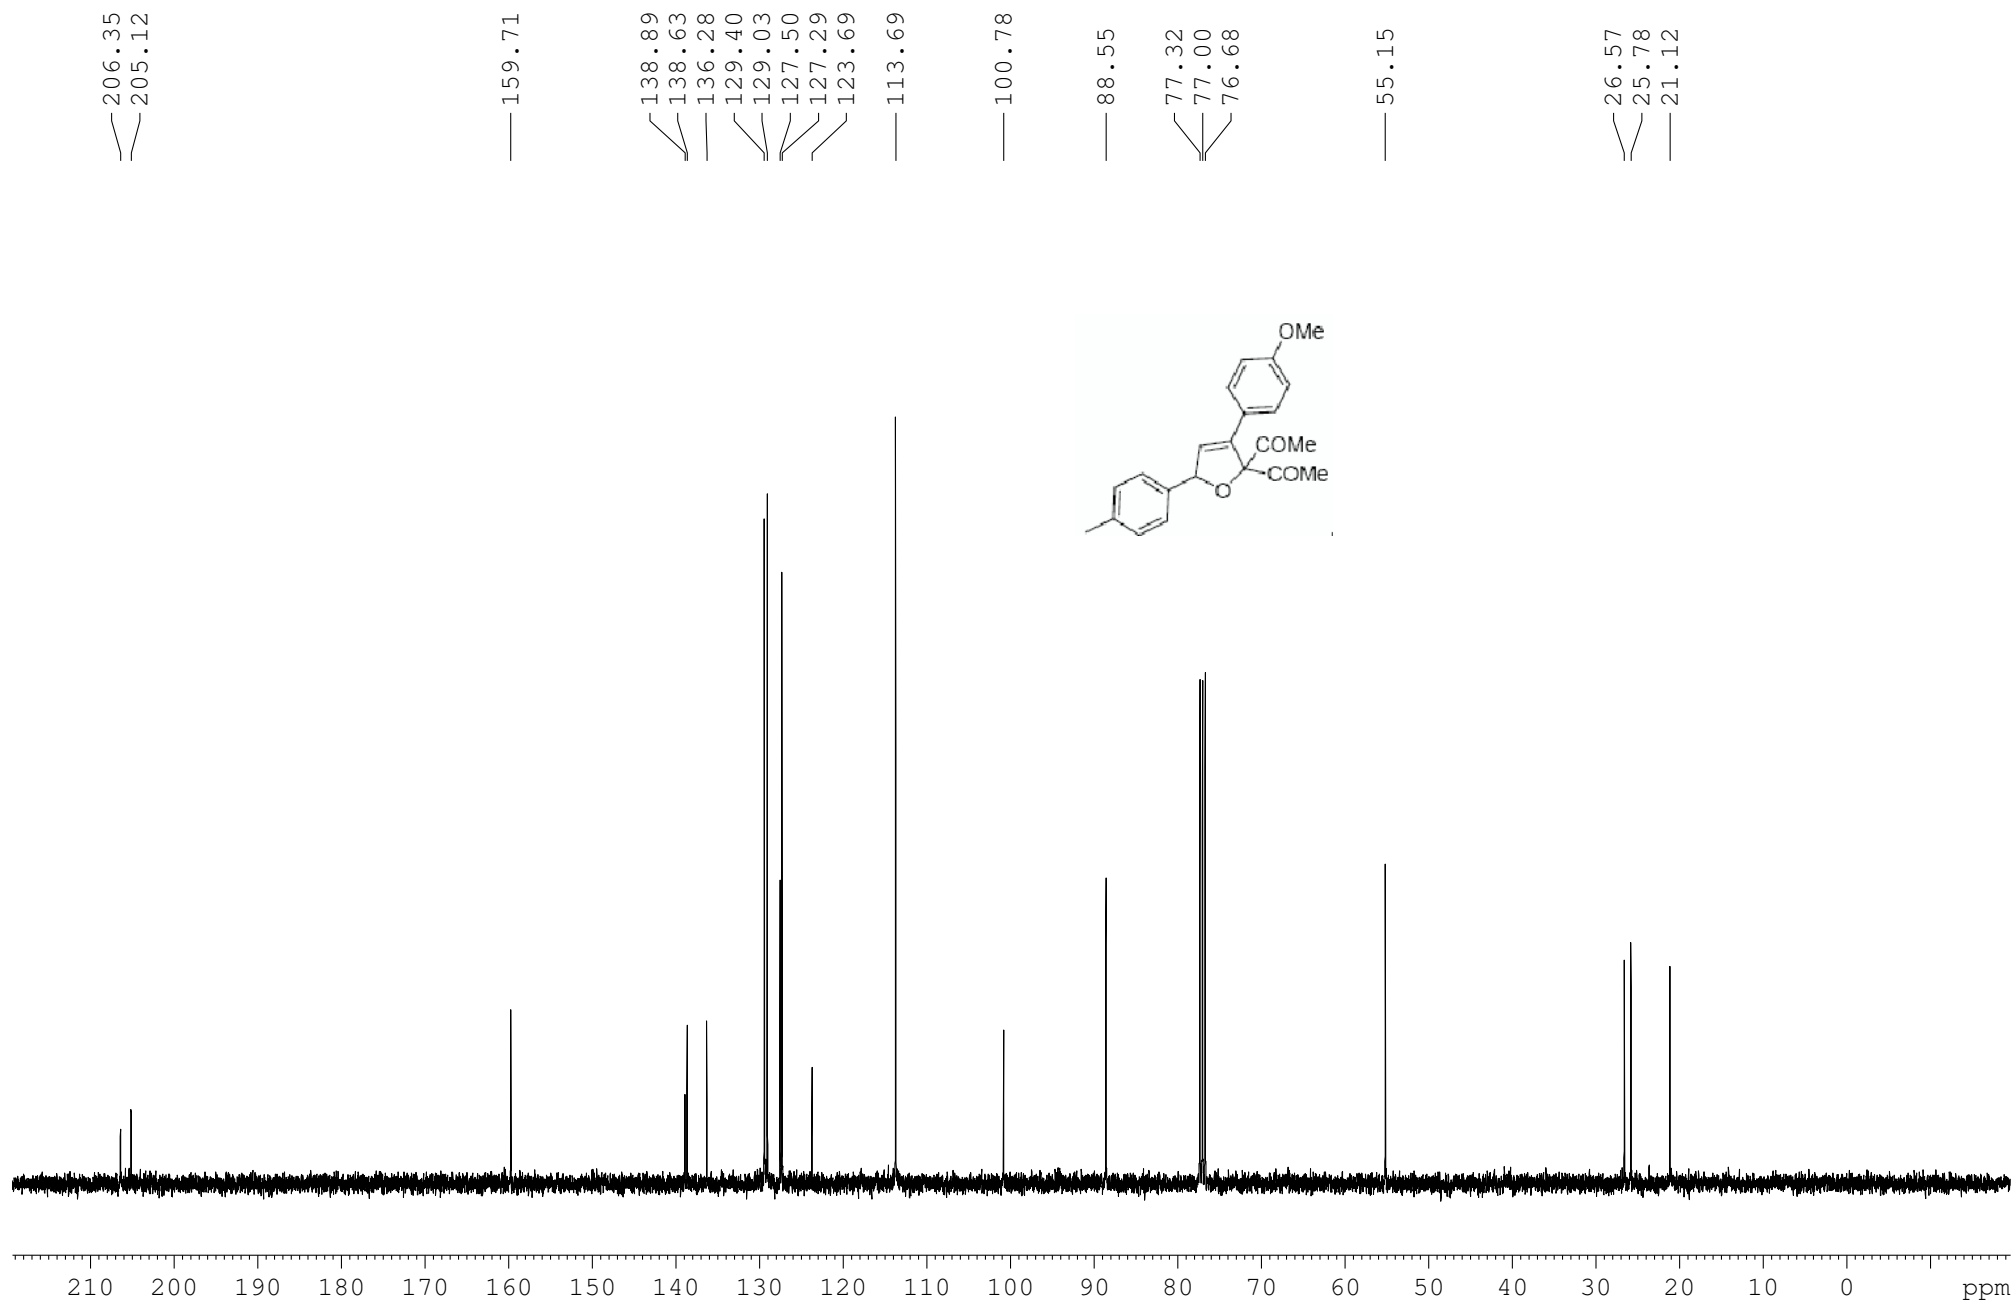

7.516  
7.499  
7.373  
7.355  
7.217  
7.199  
6.841  
6.822  
— 6.395  
— 6.040

— 3.783

— 2.308  
— 2.158

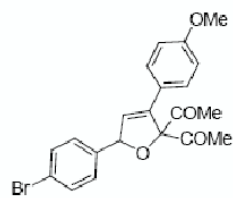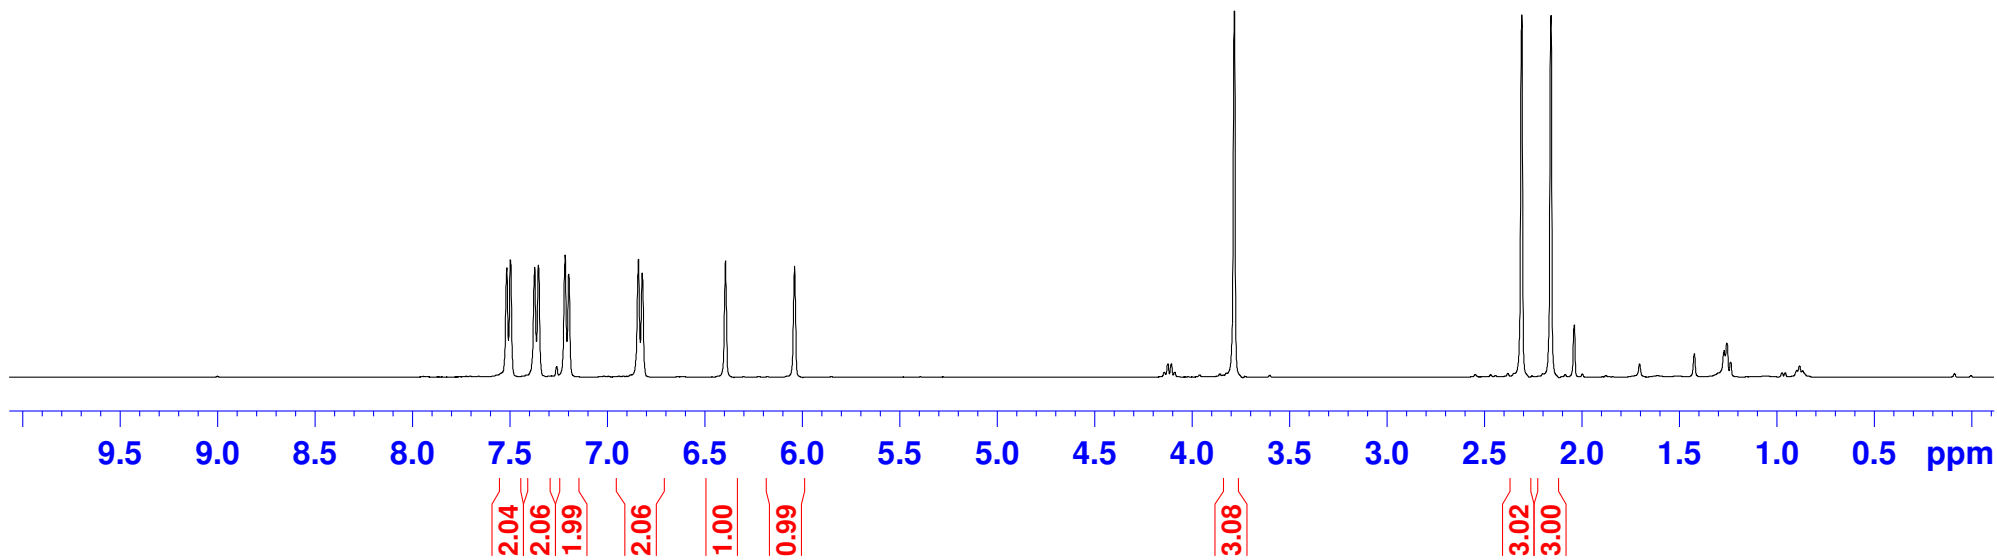

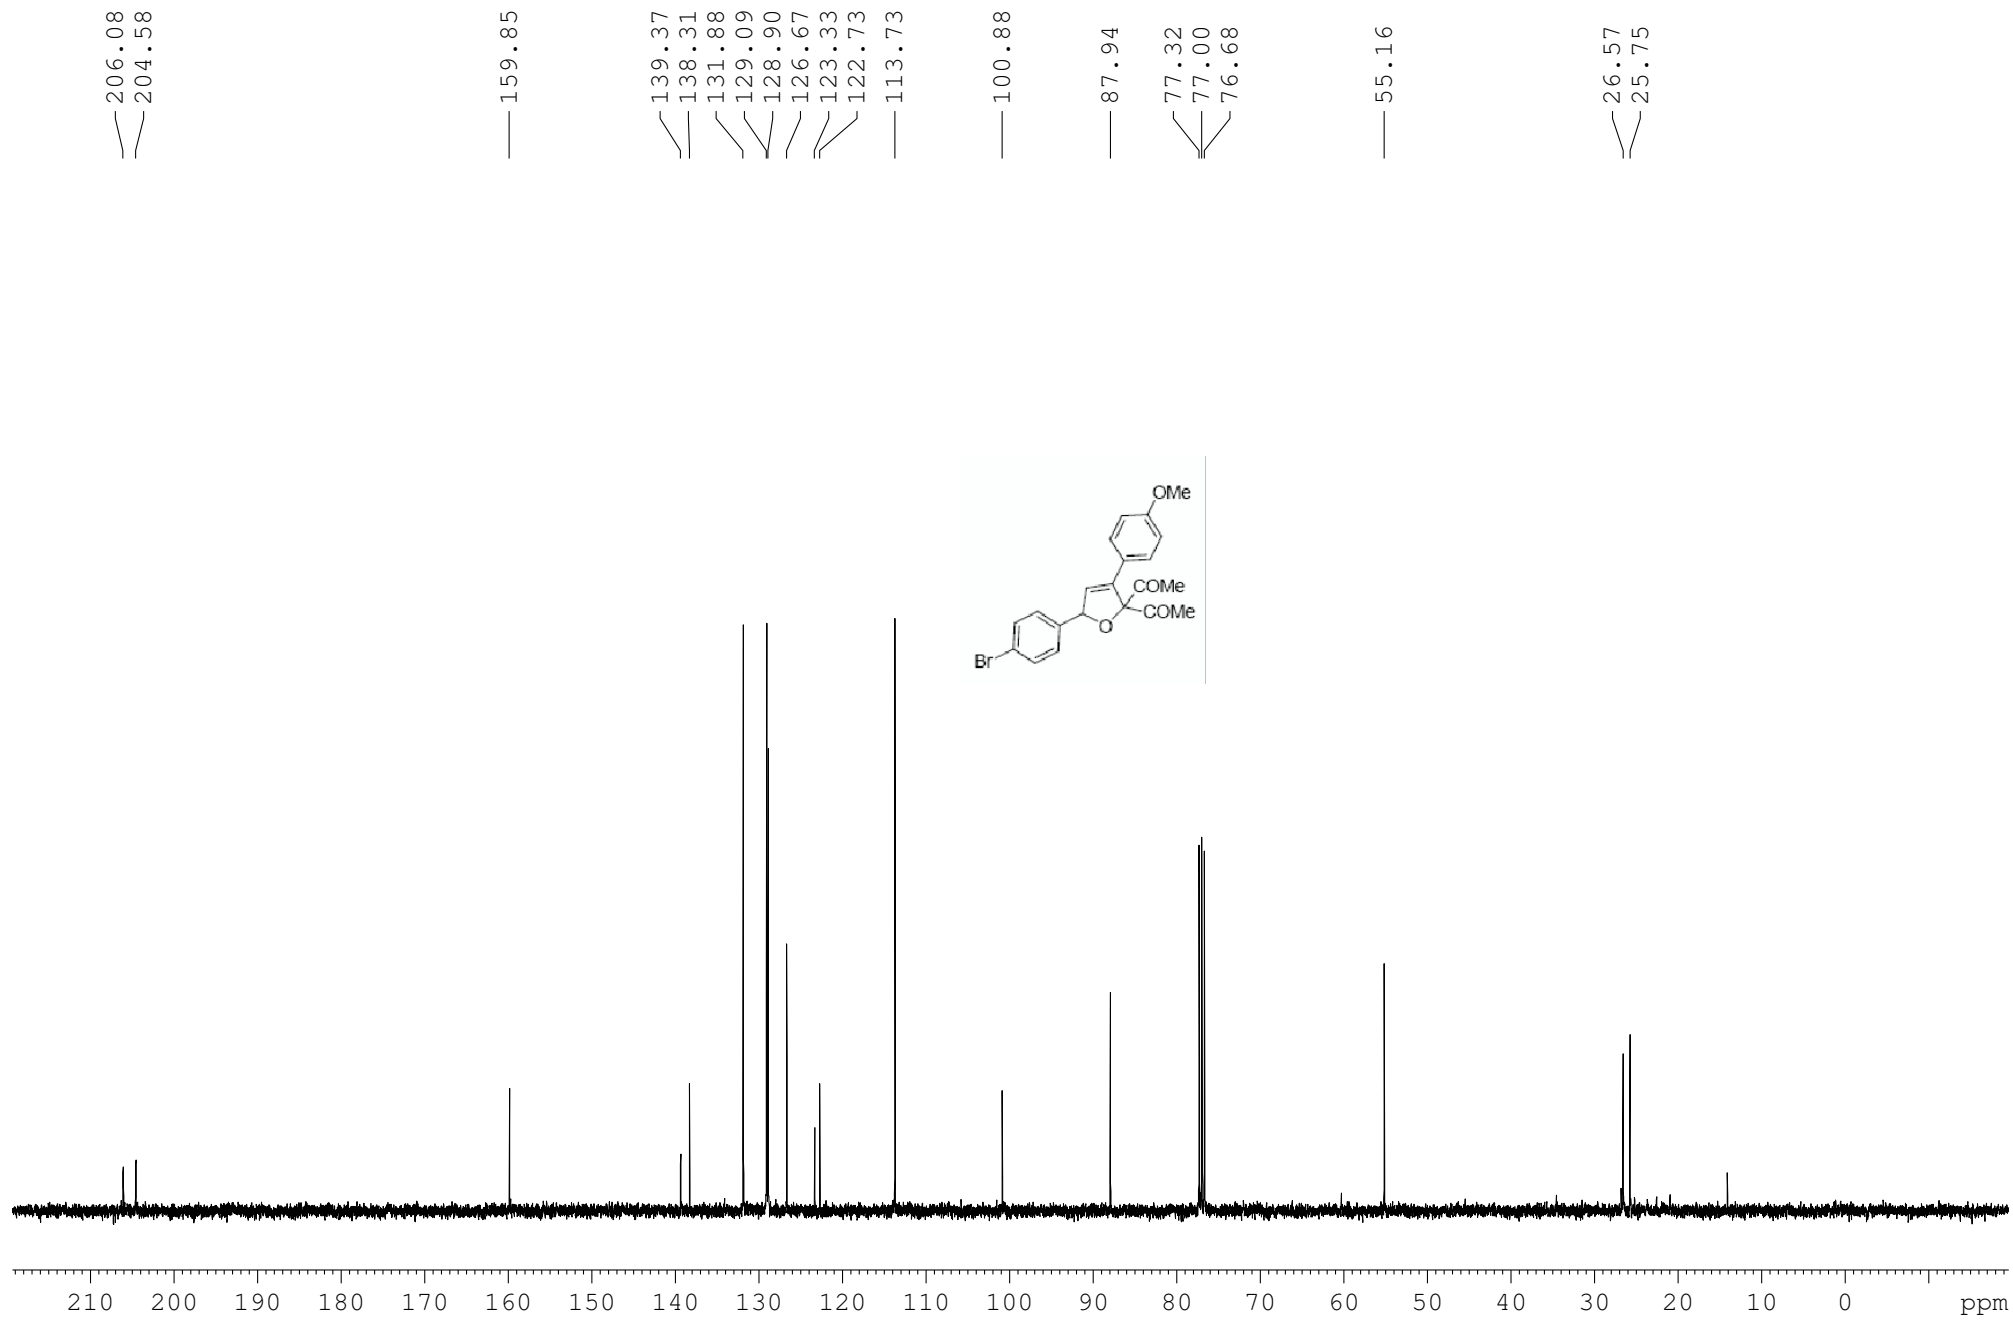



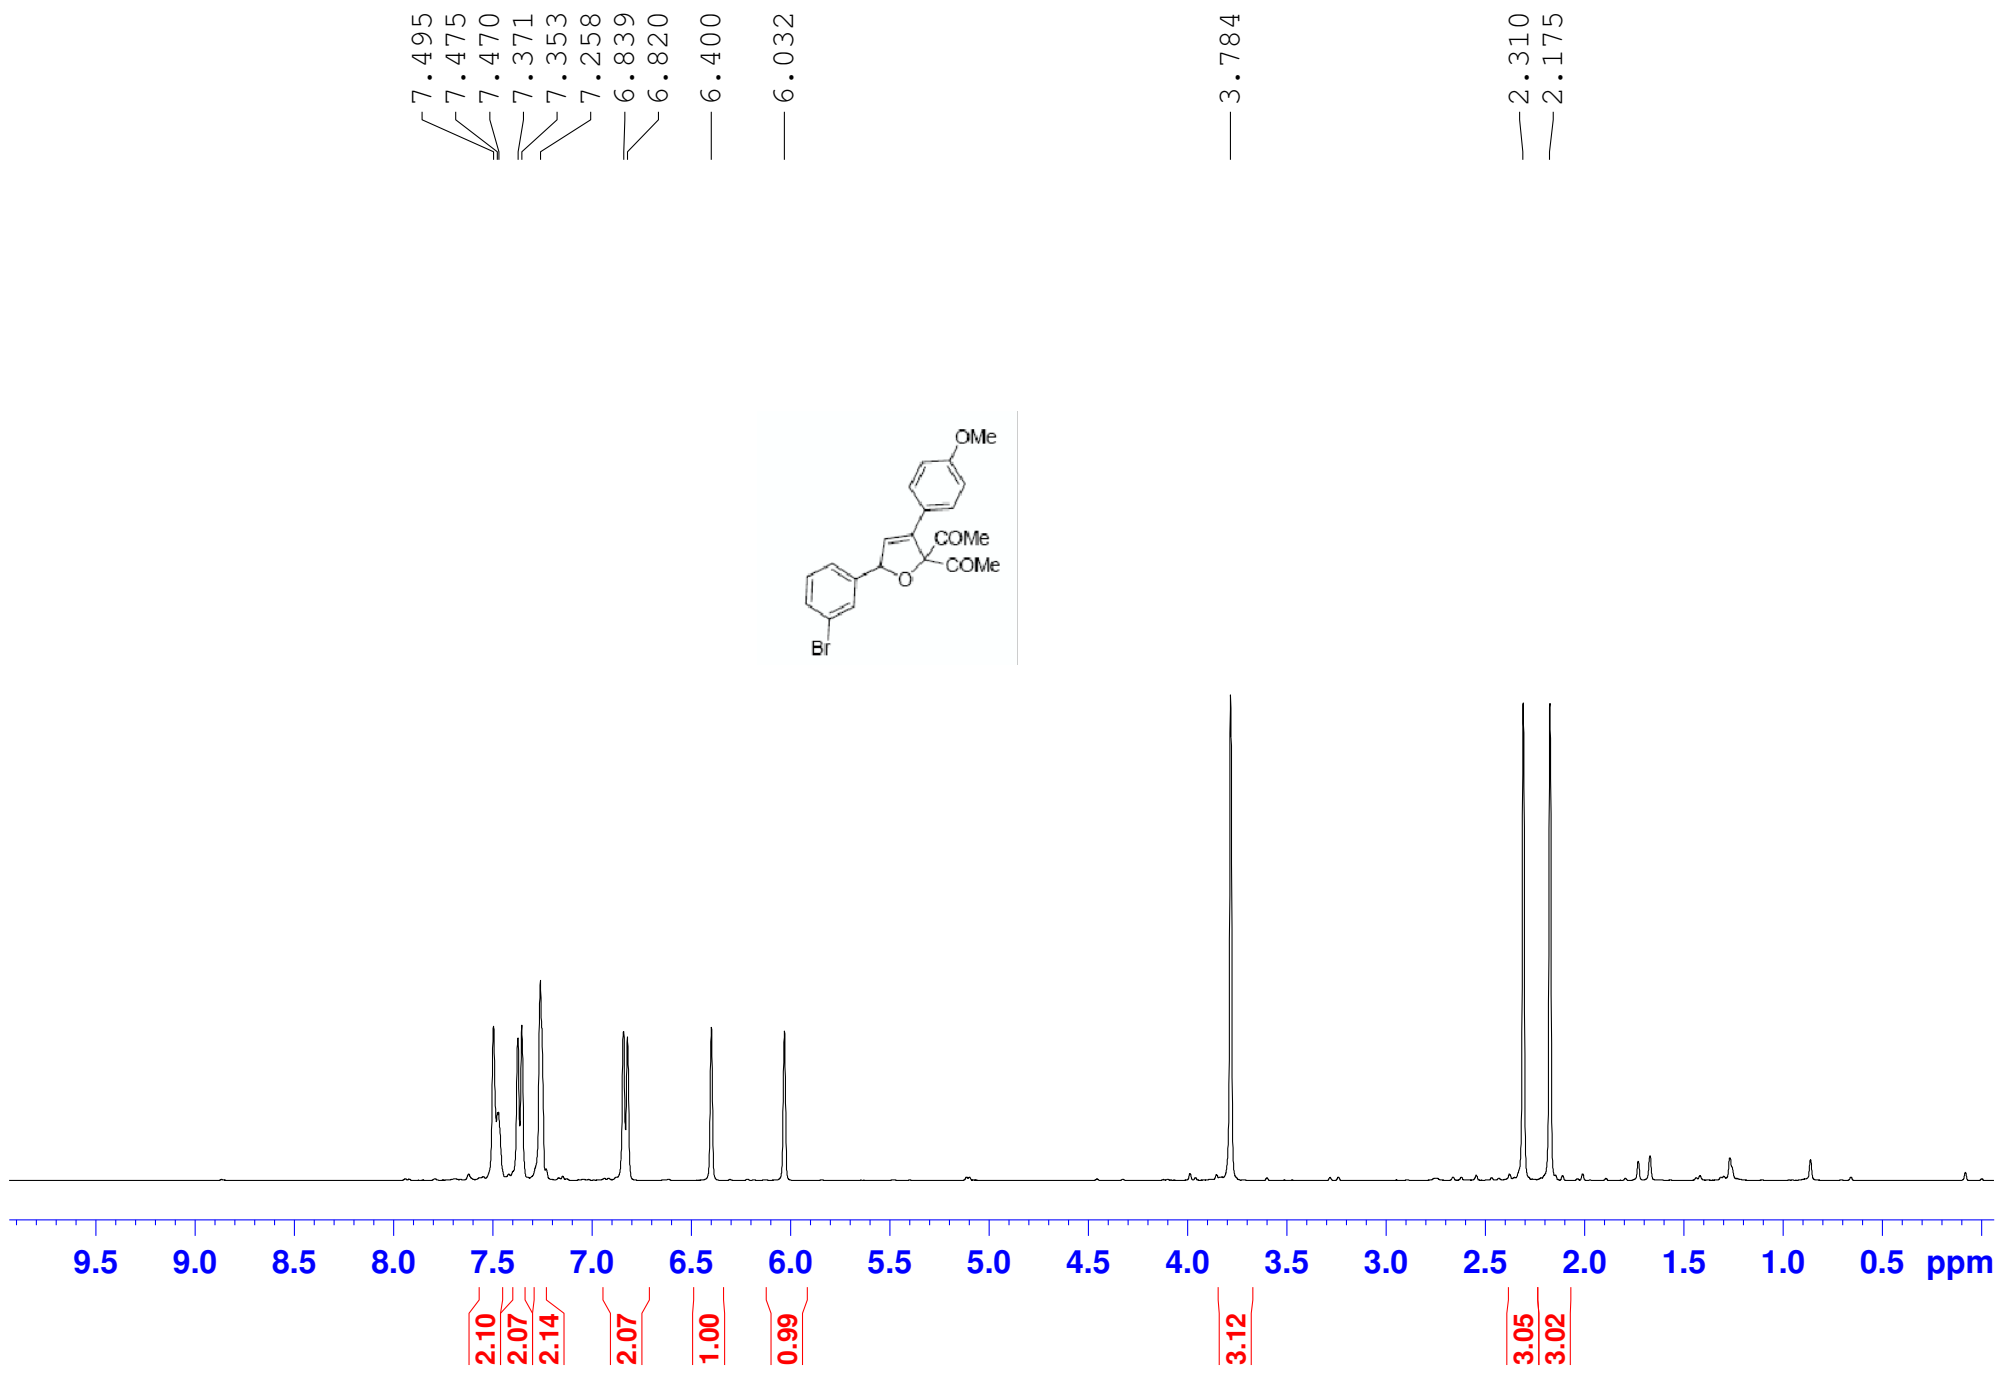

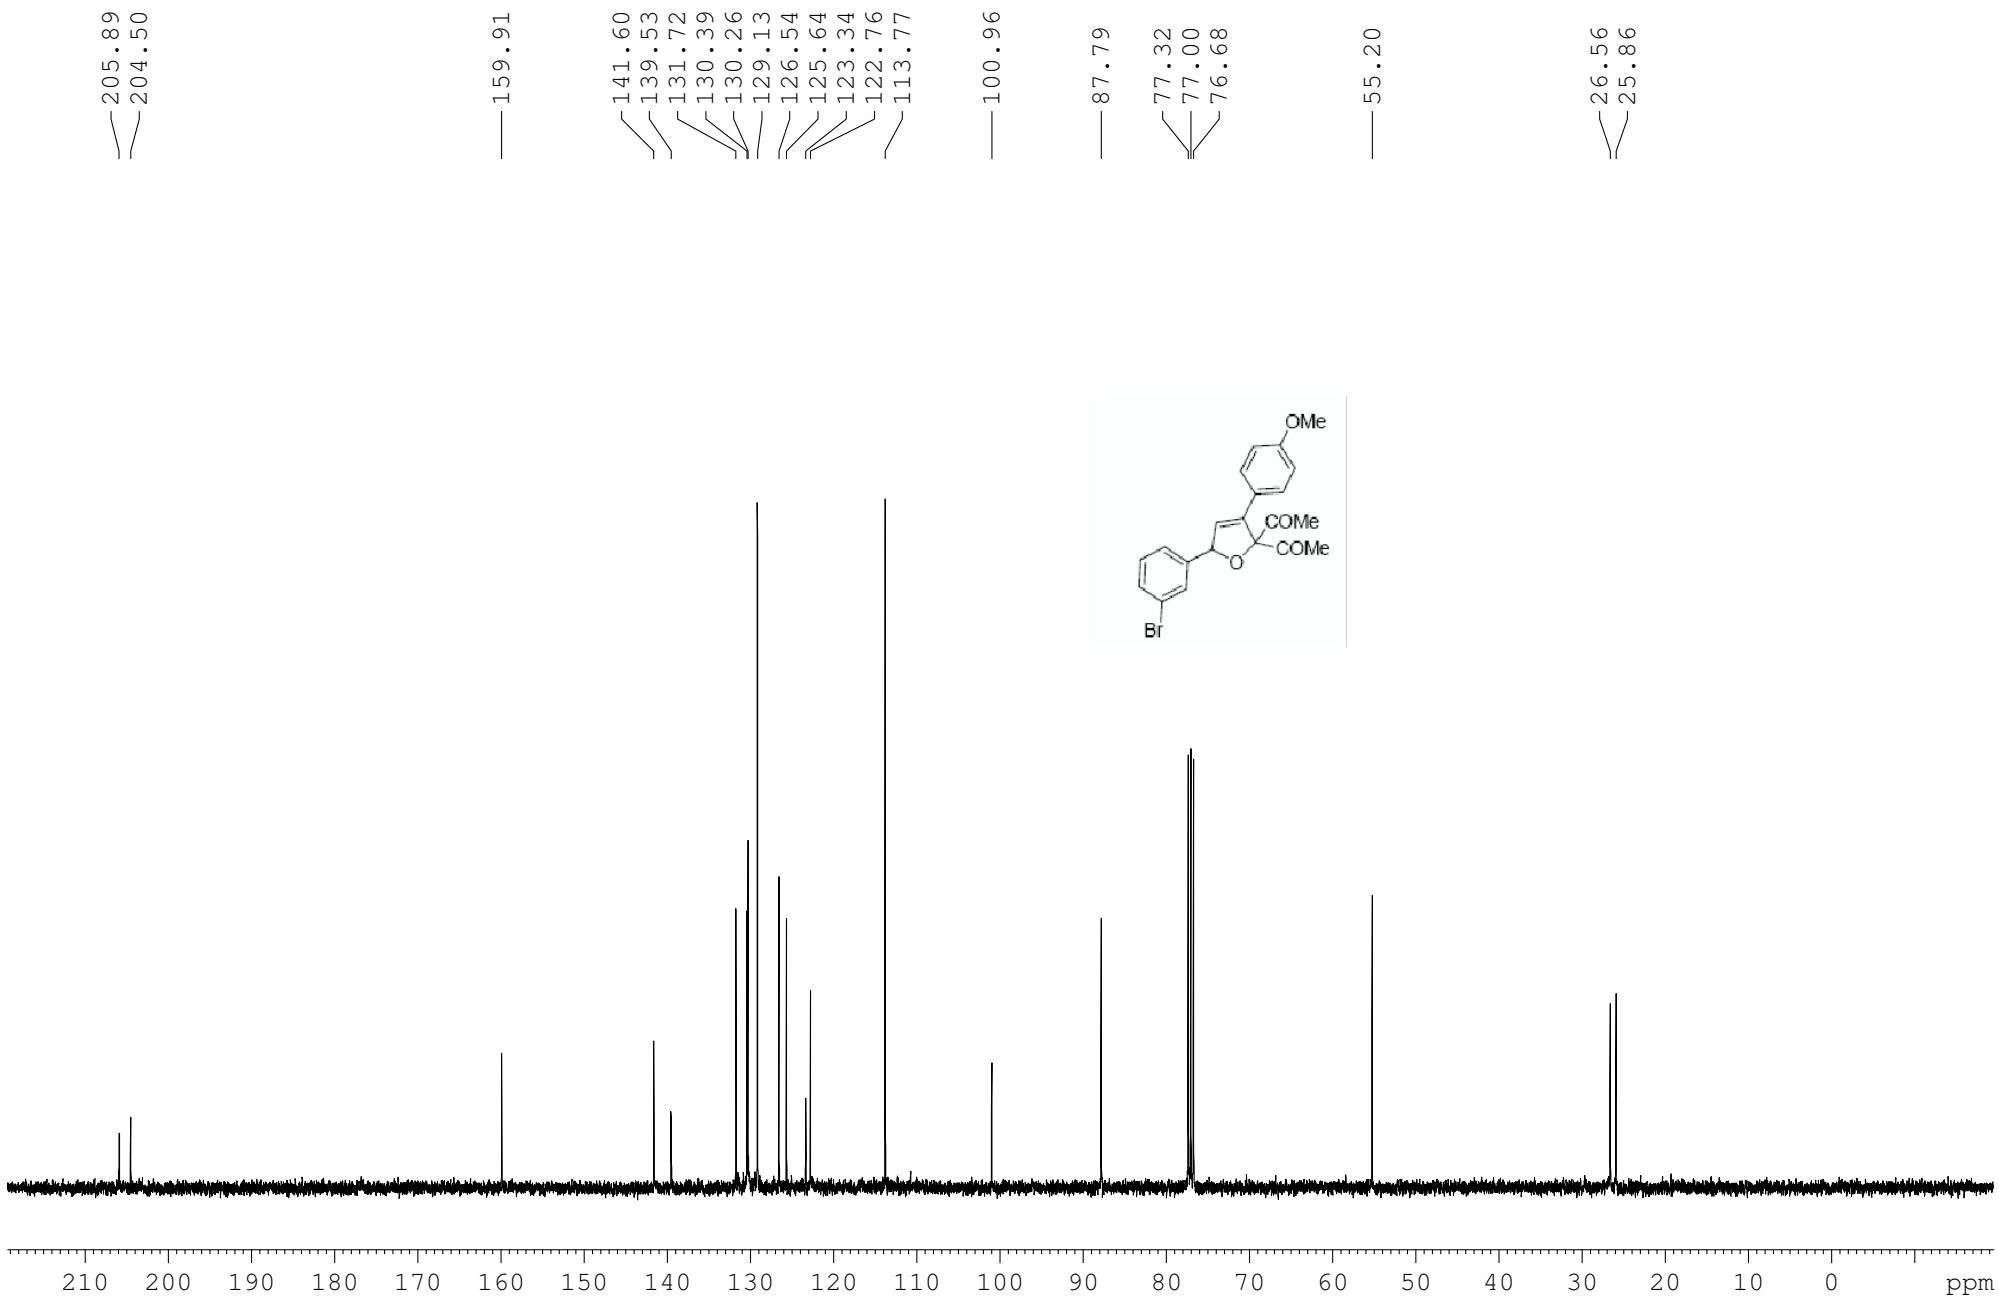

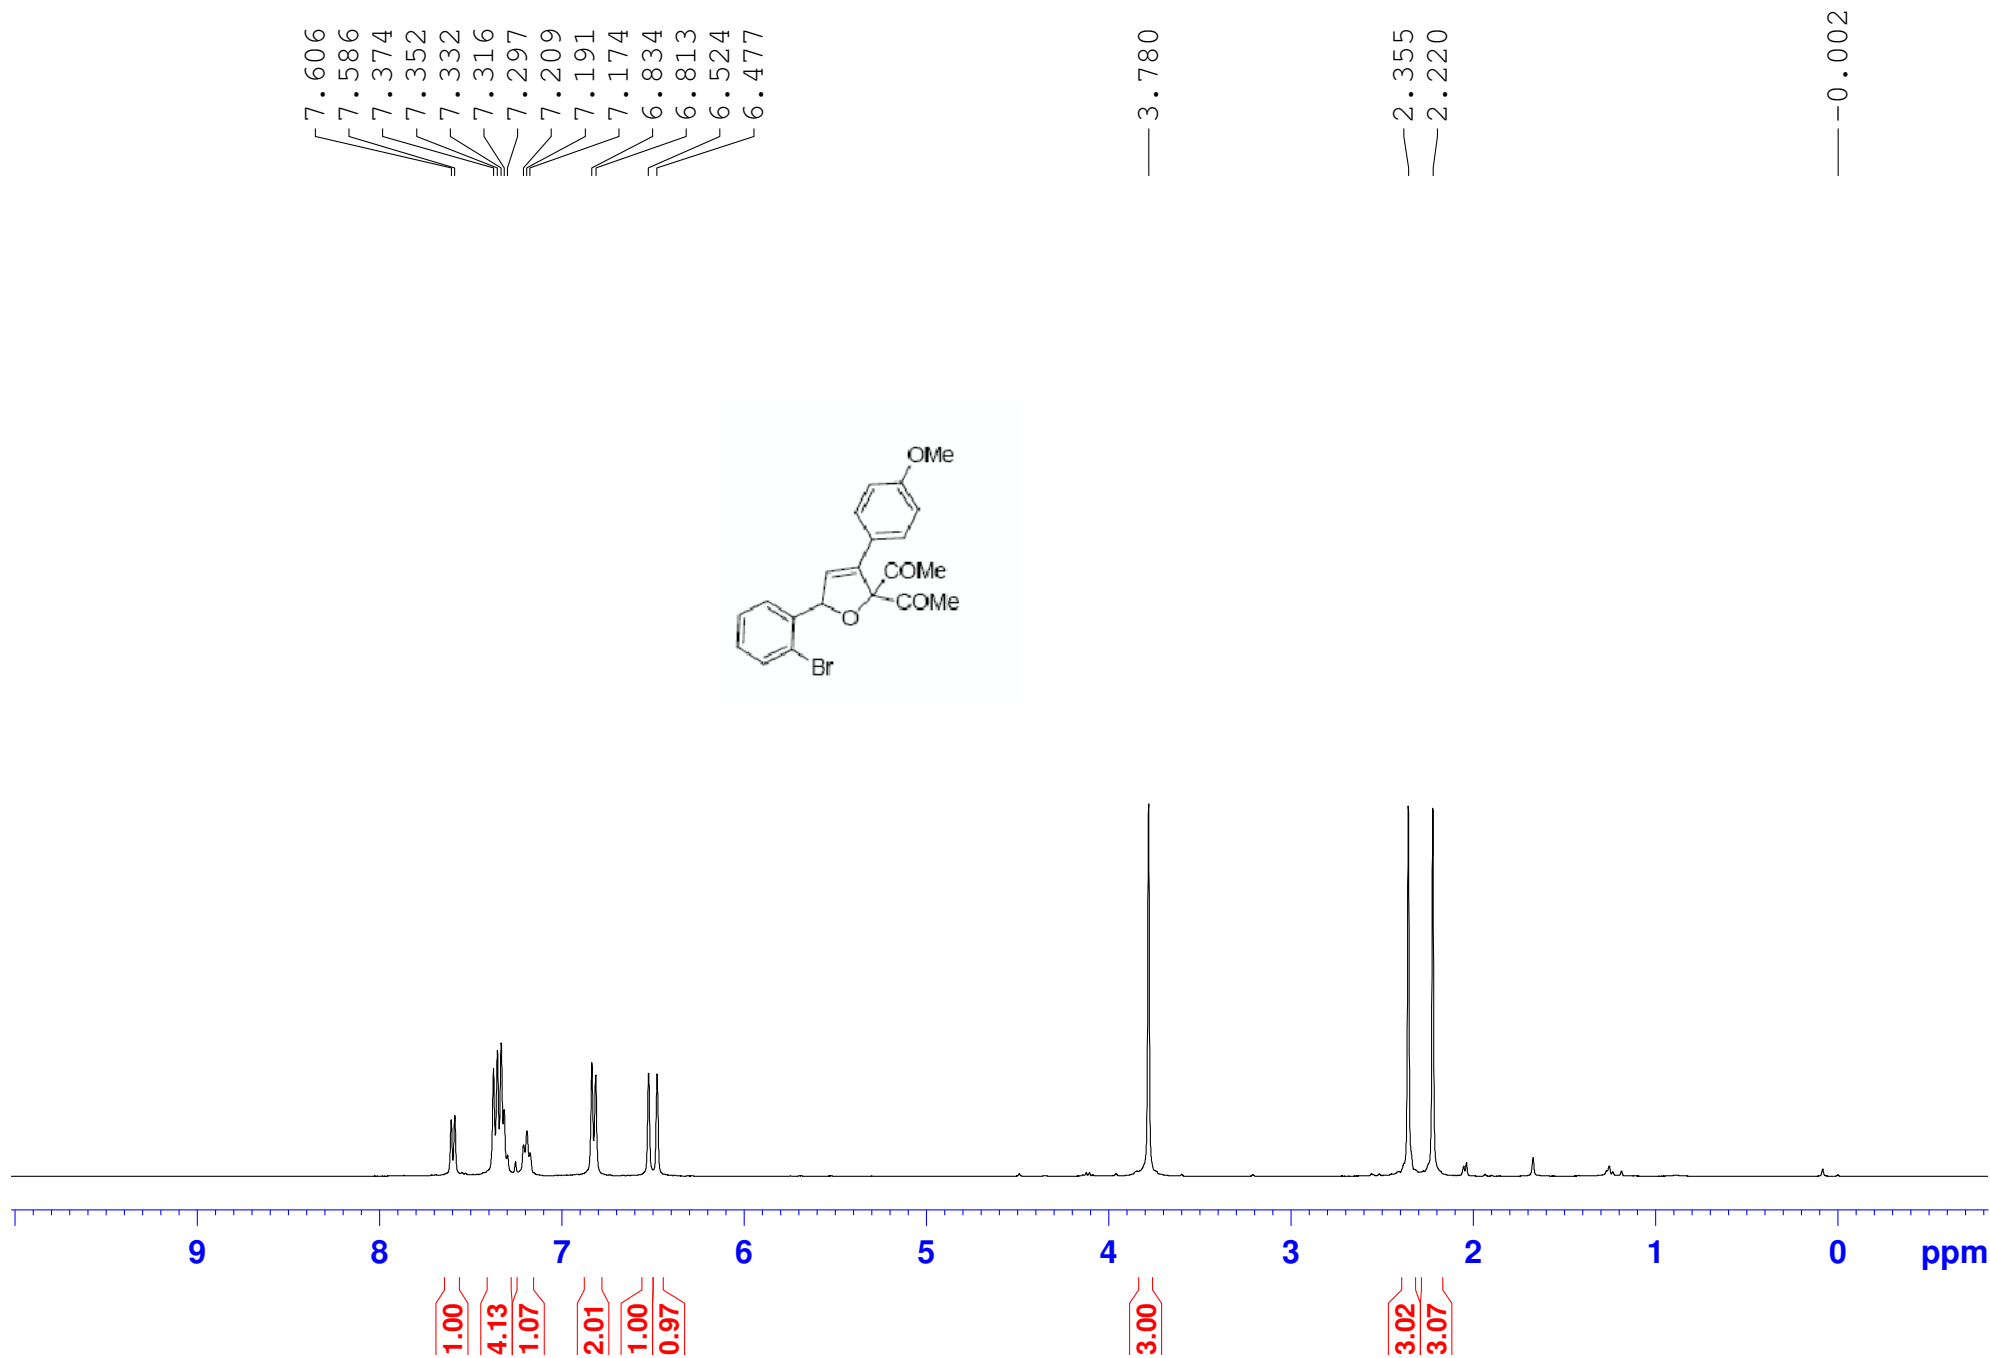

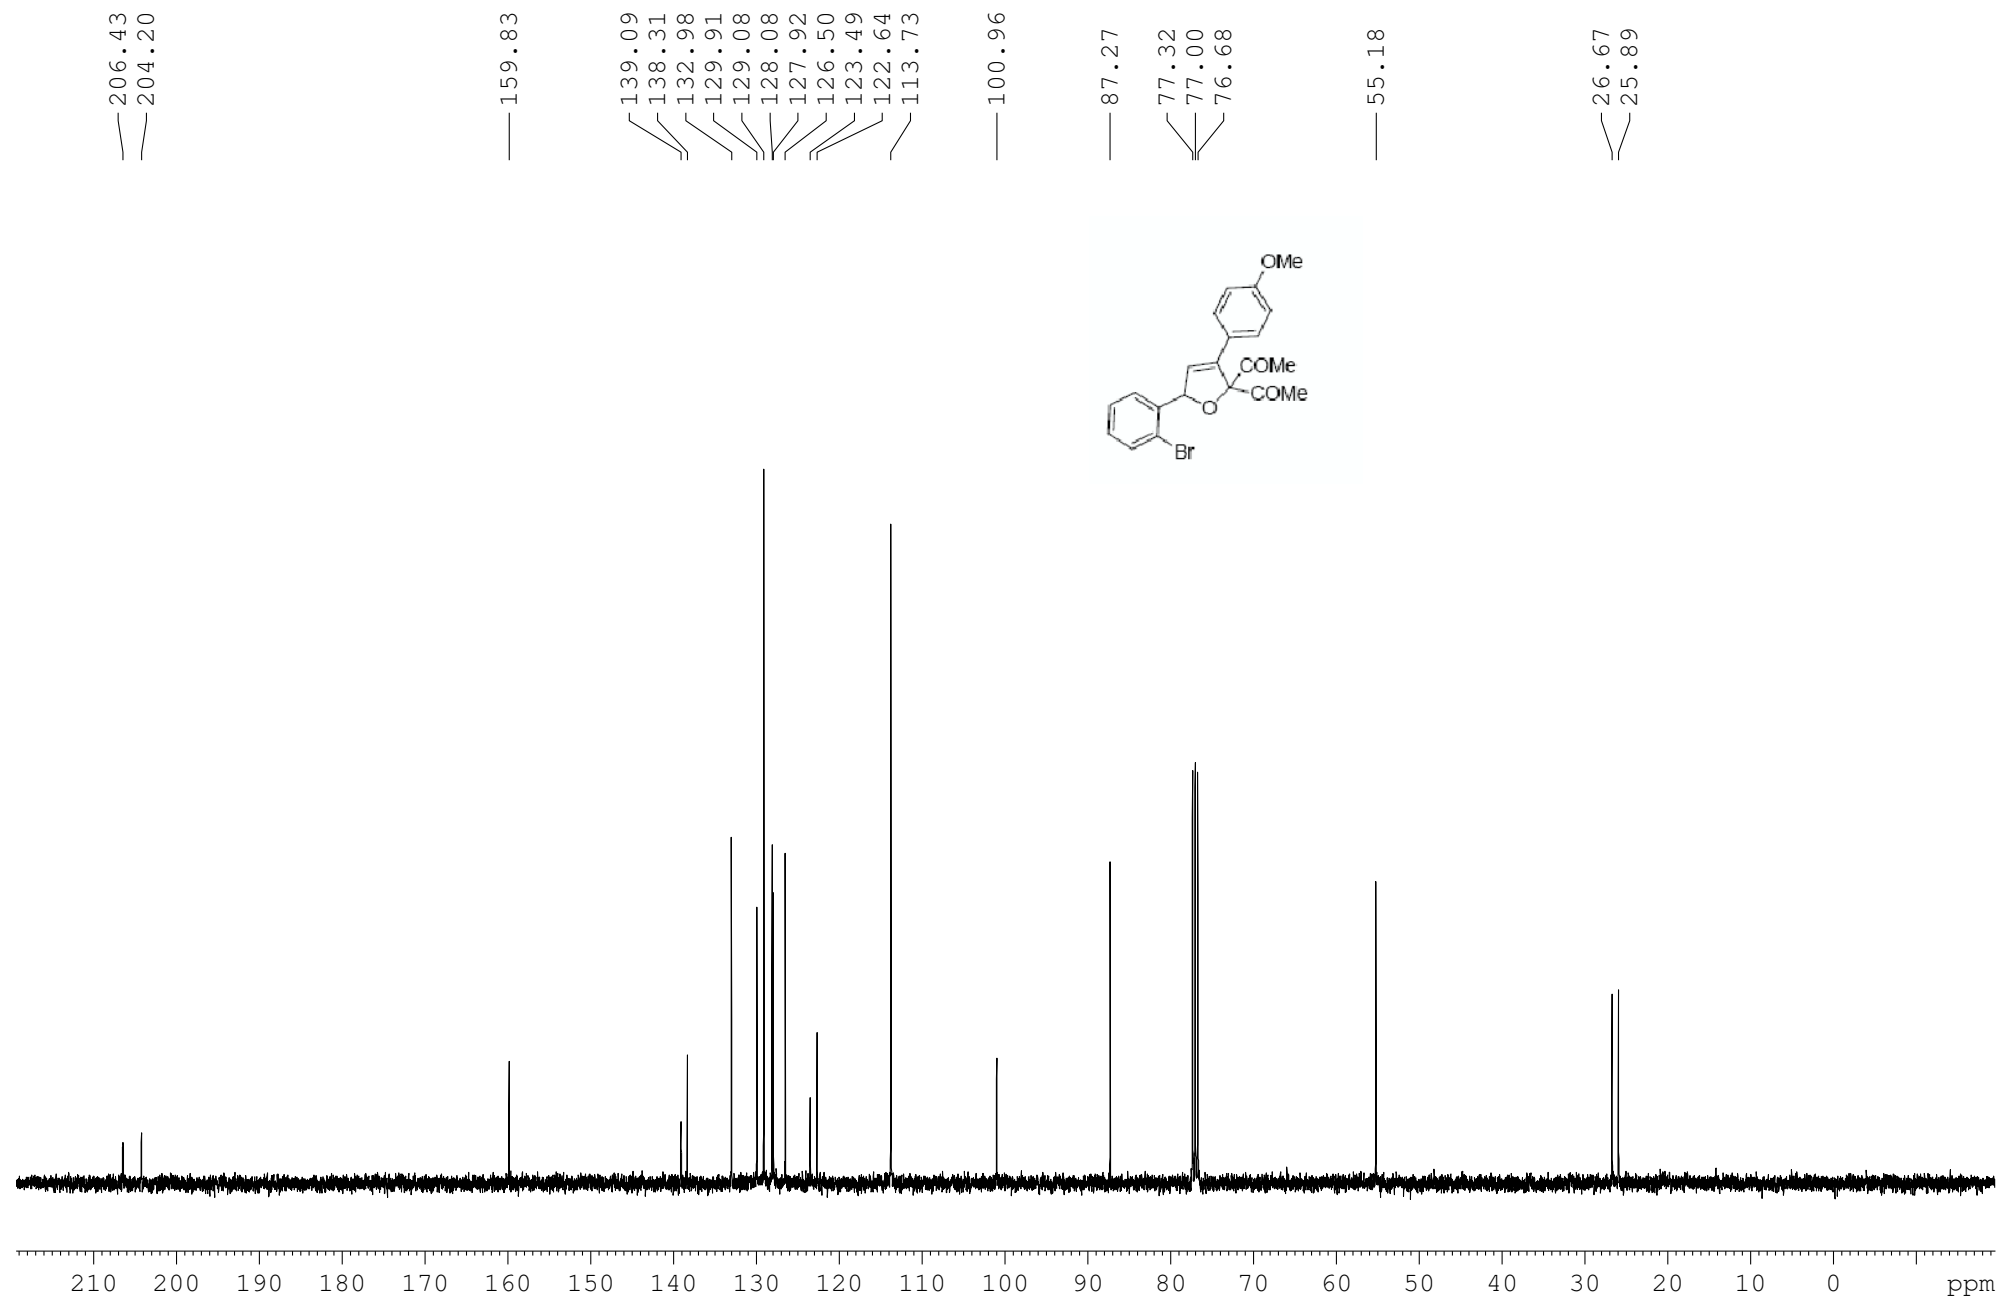

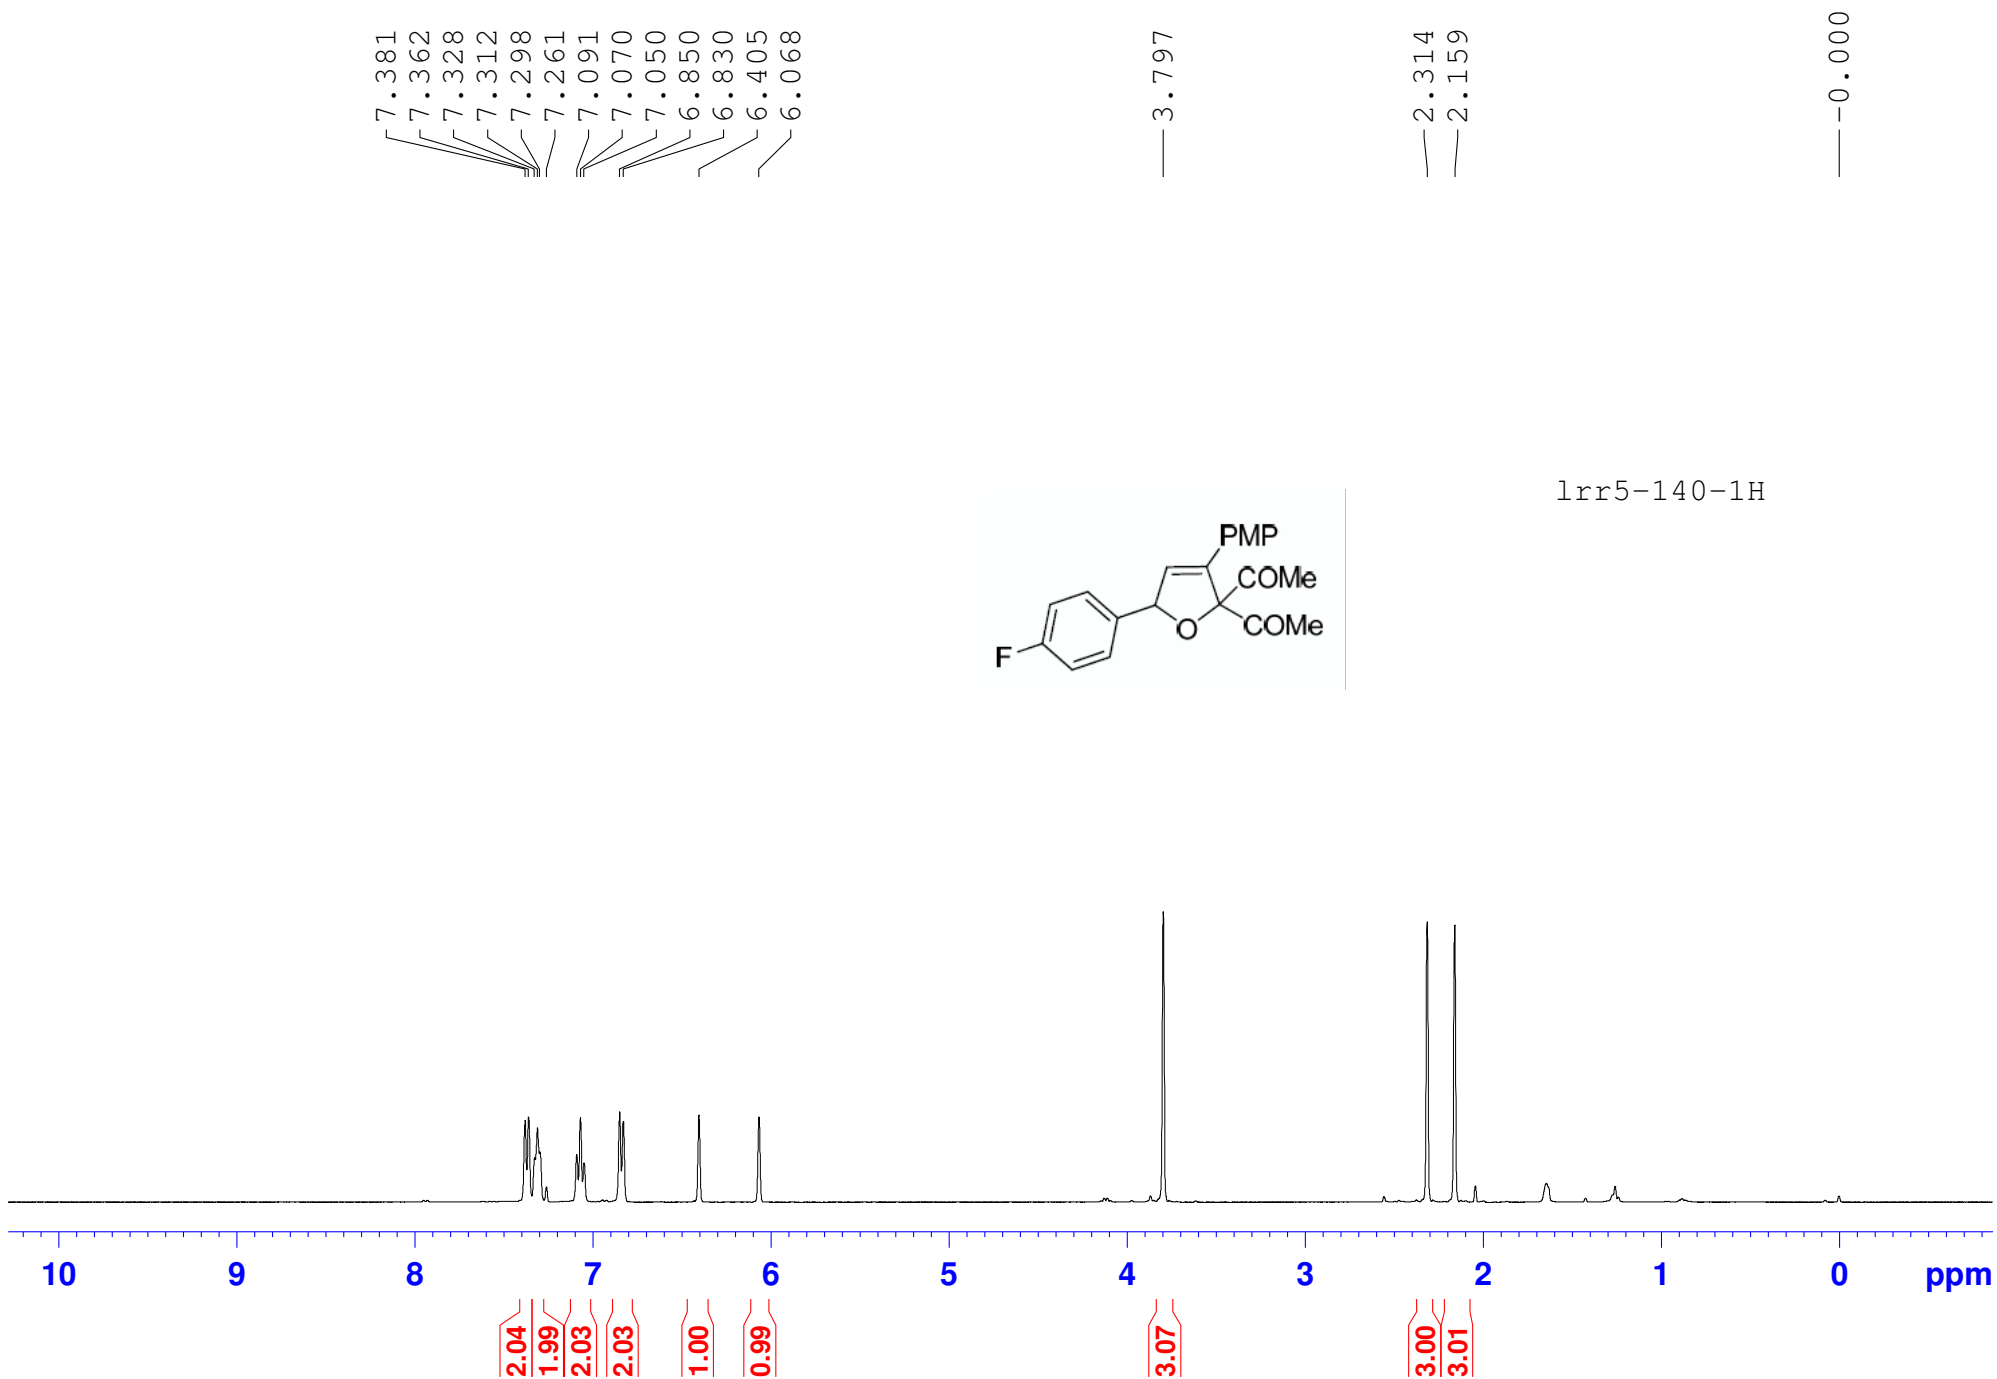

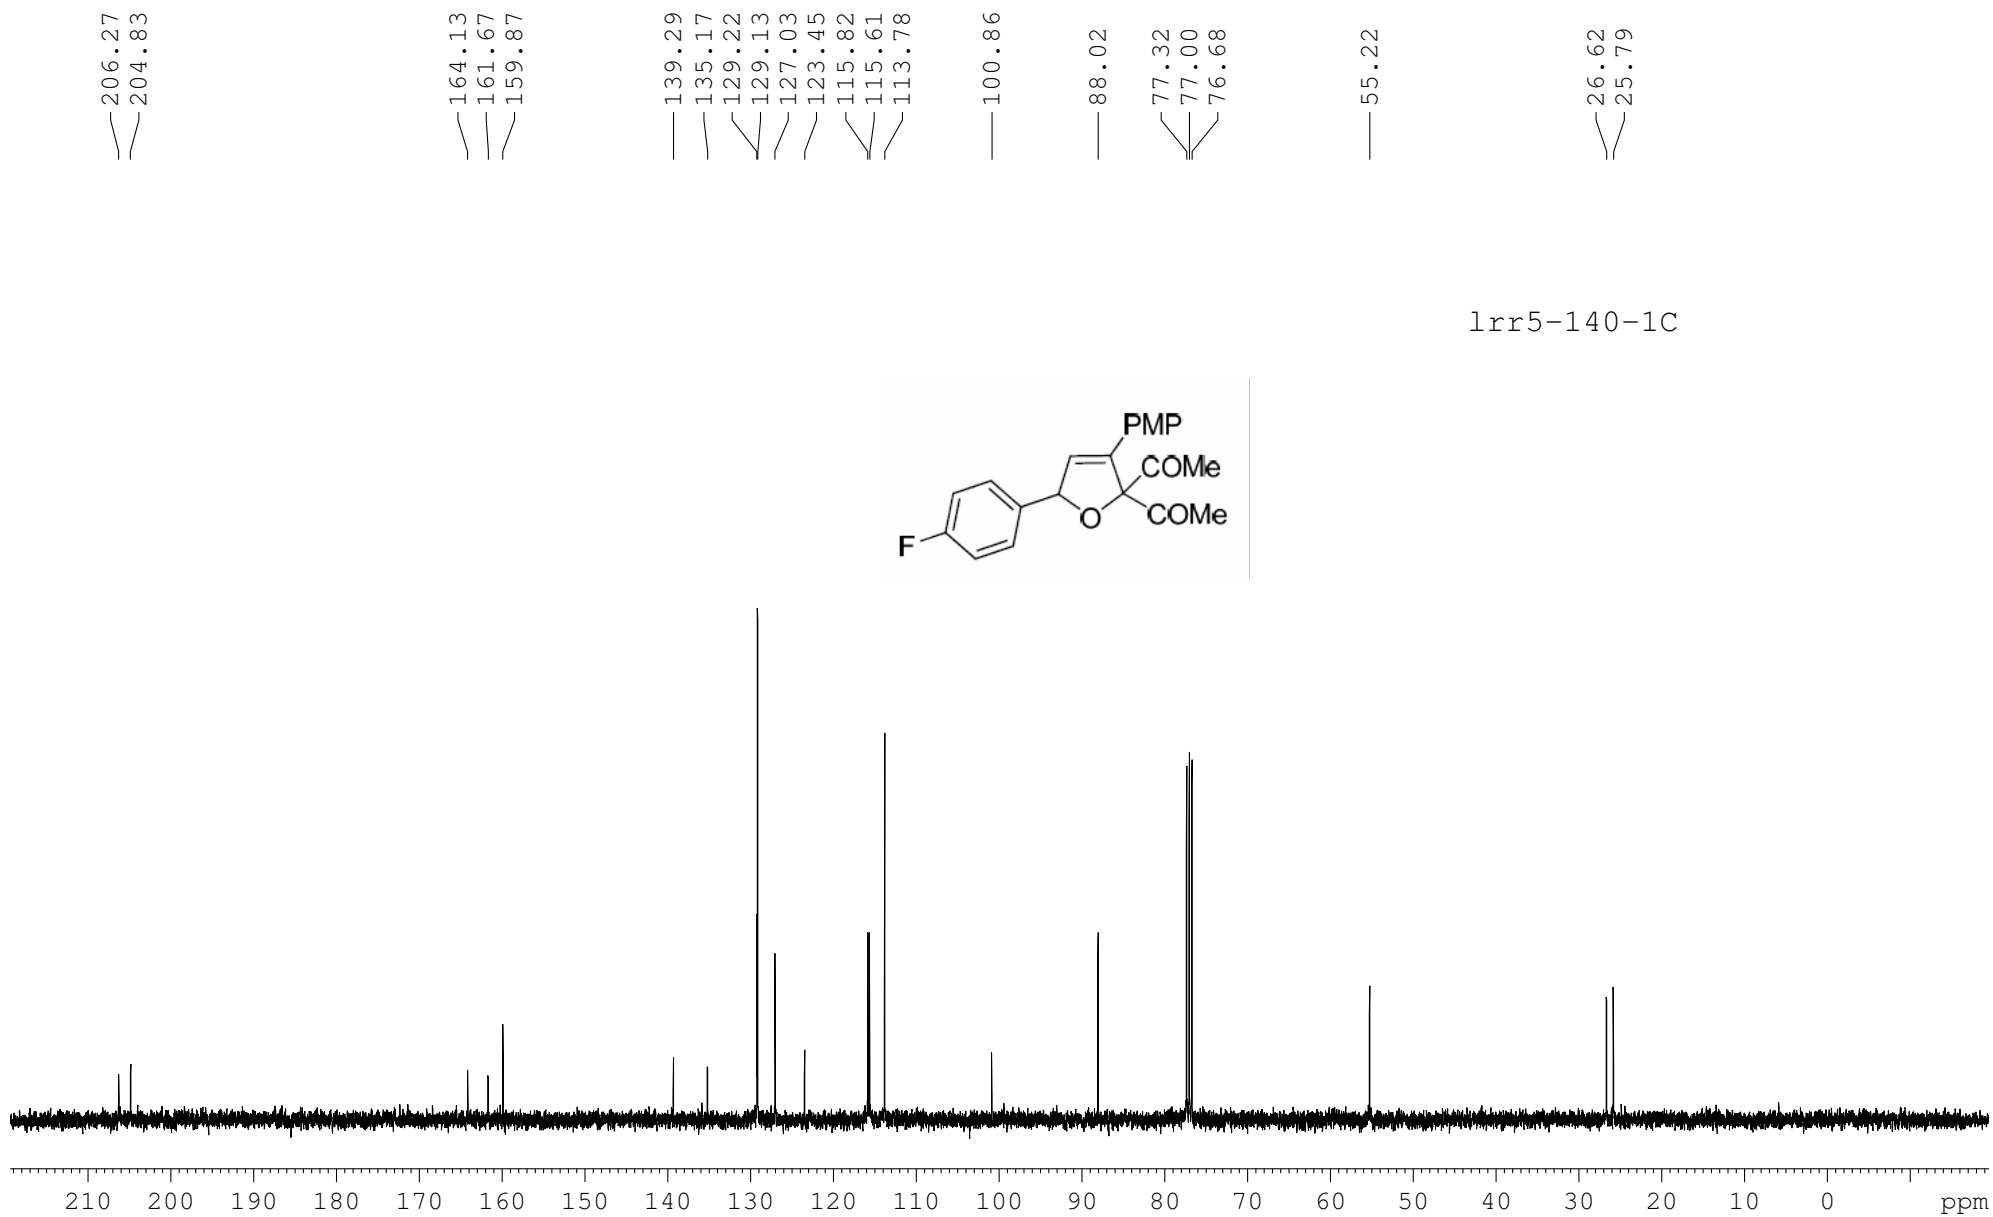

lrr5-140-1C

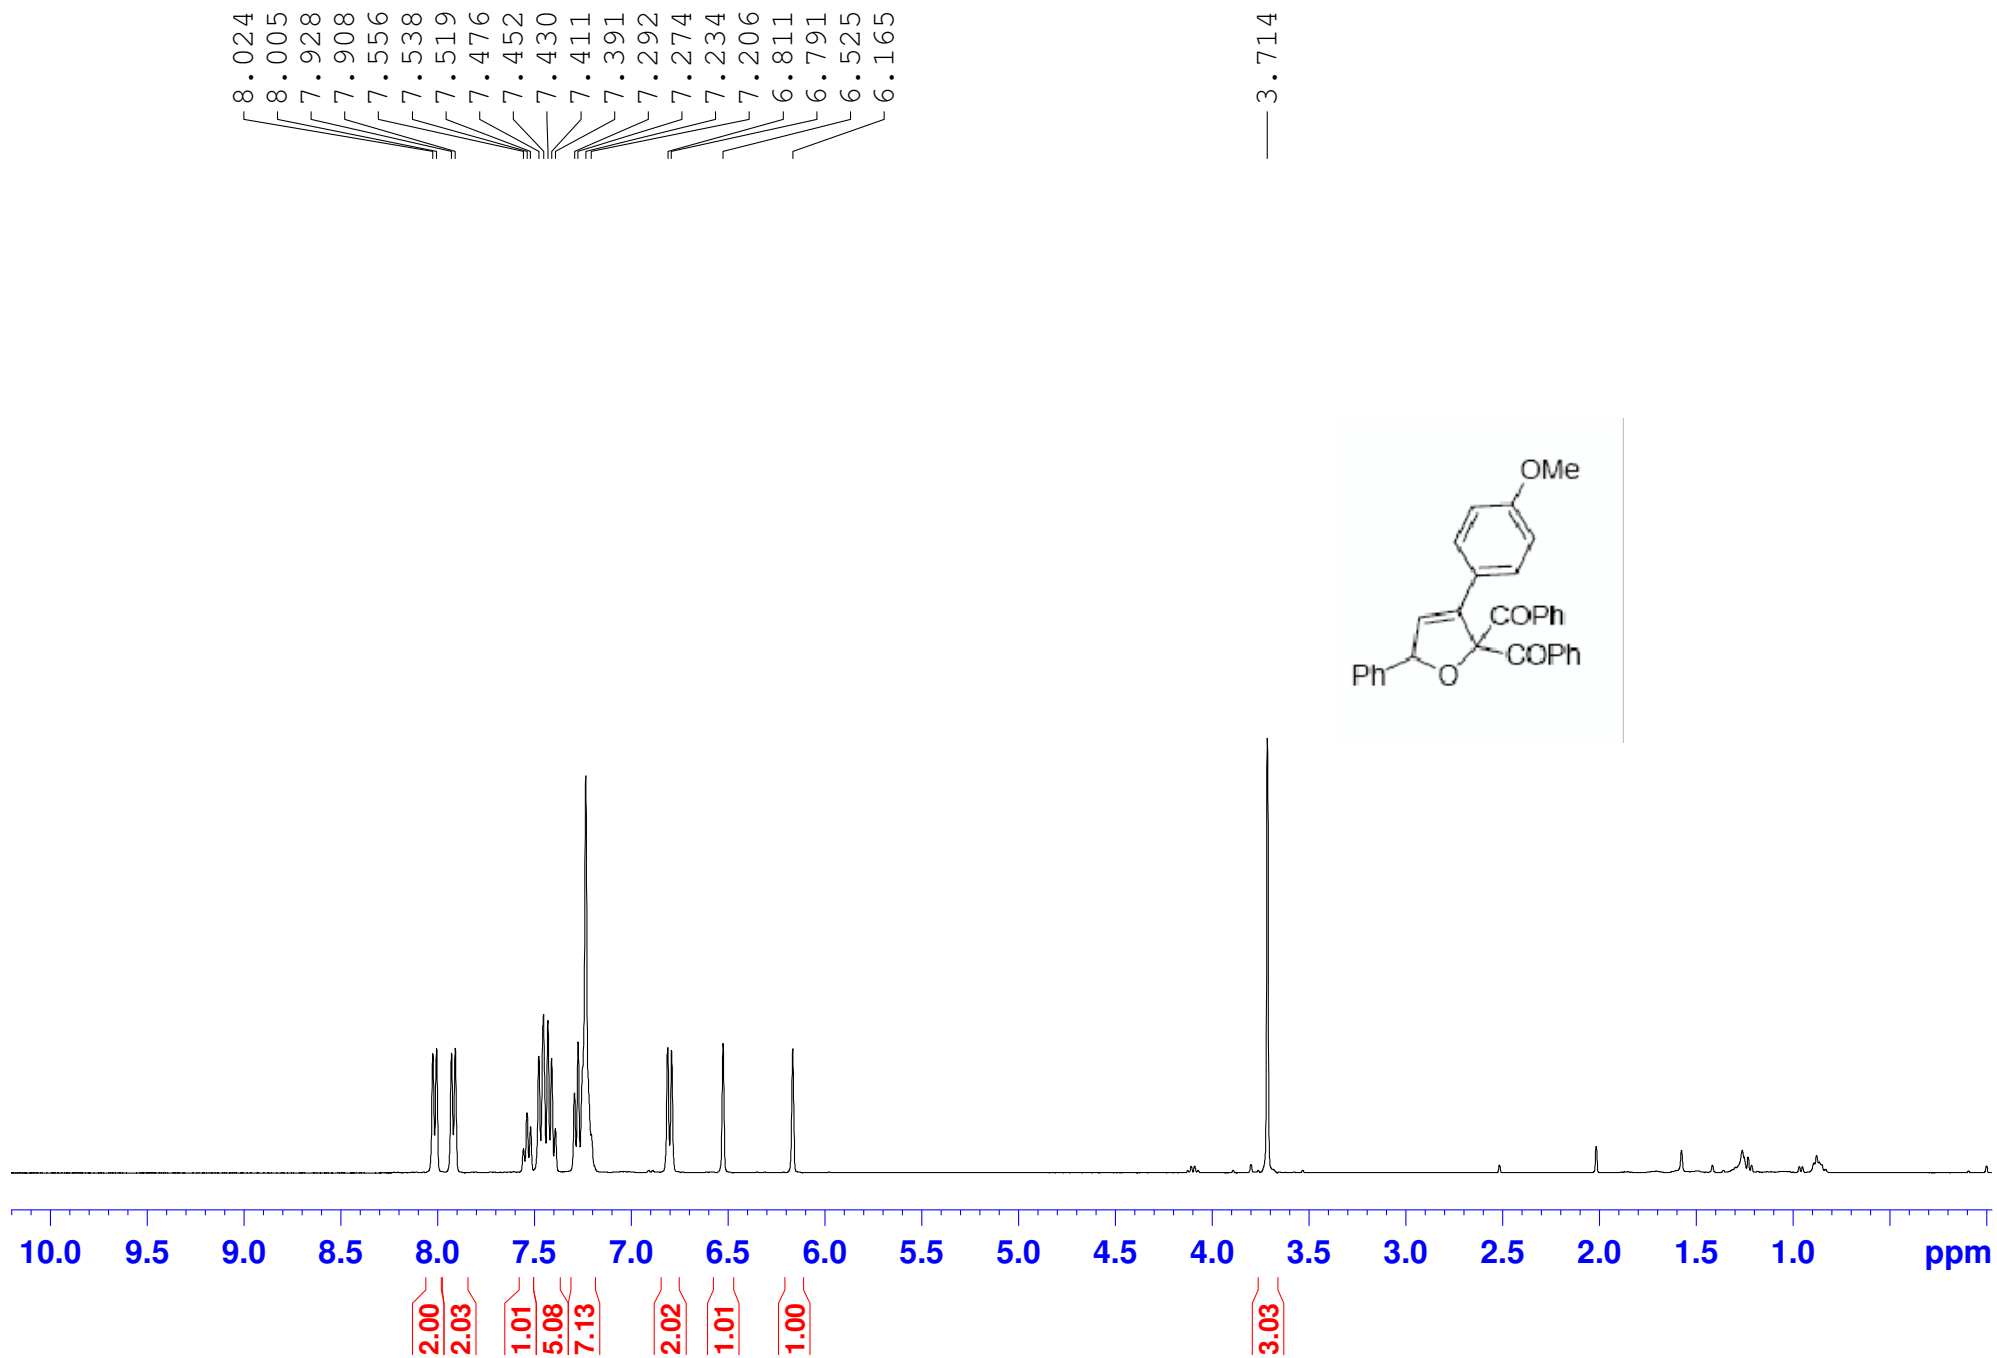

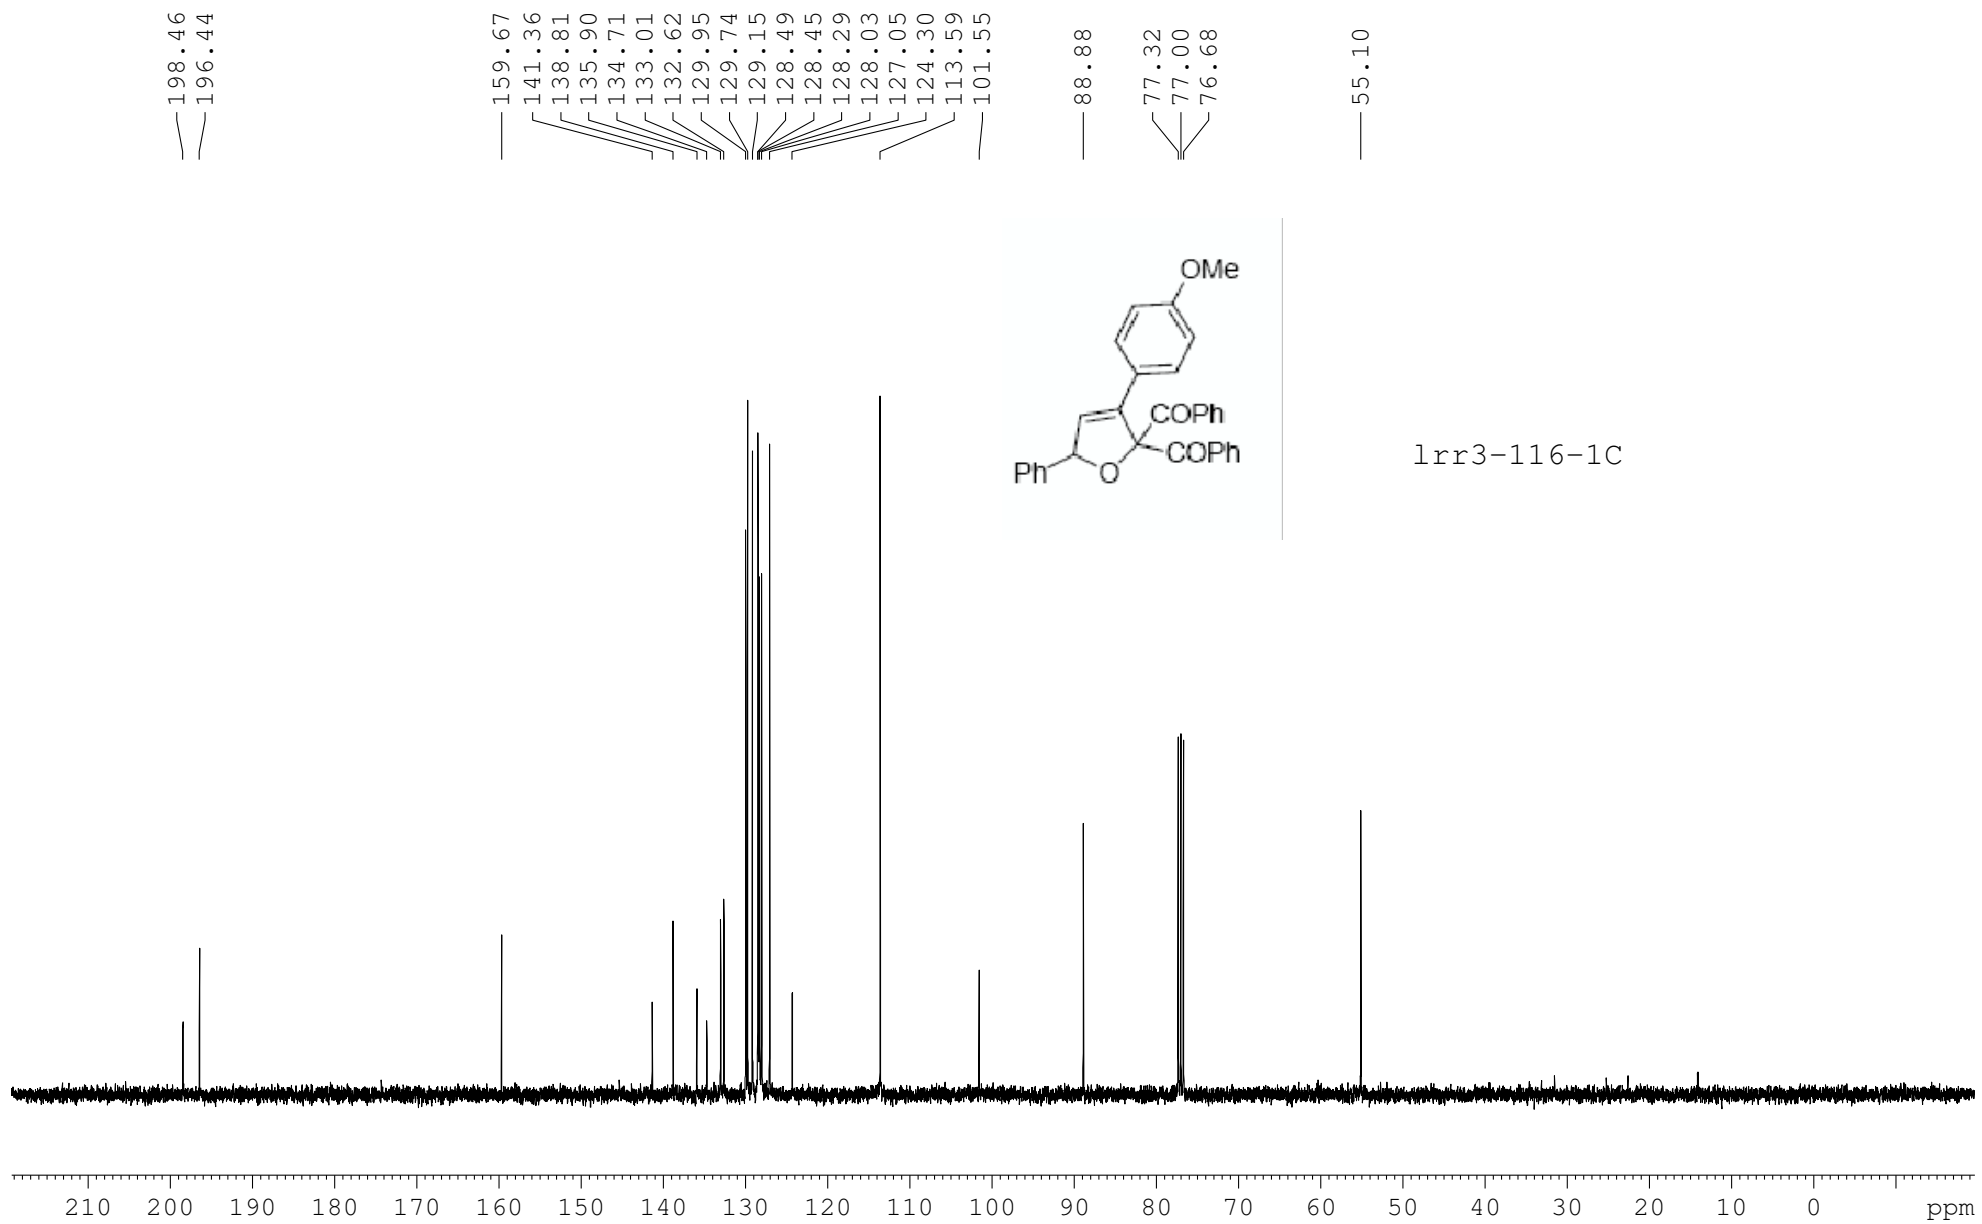



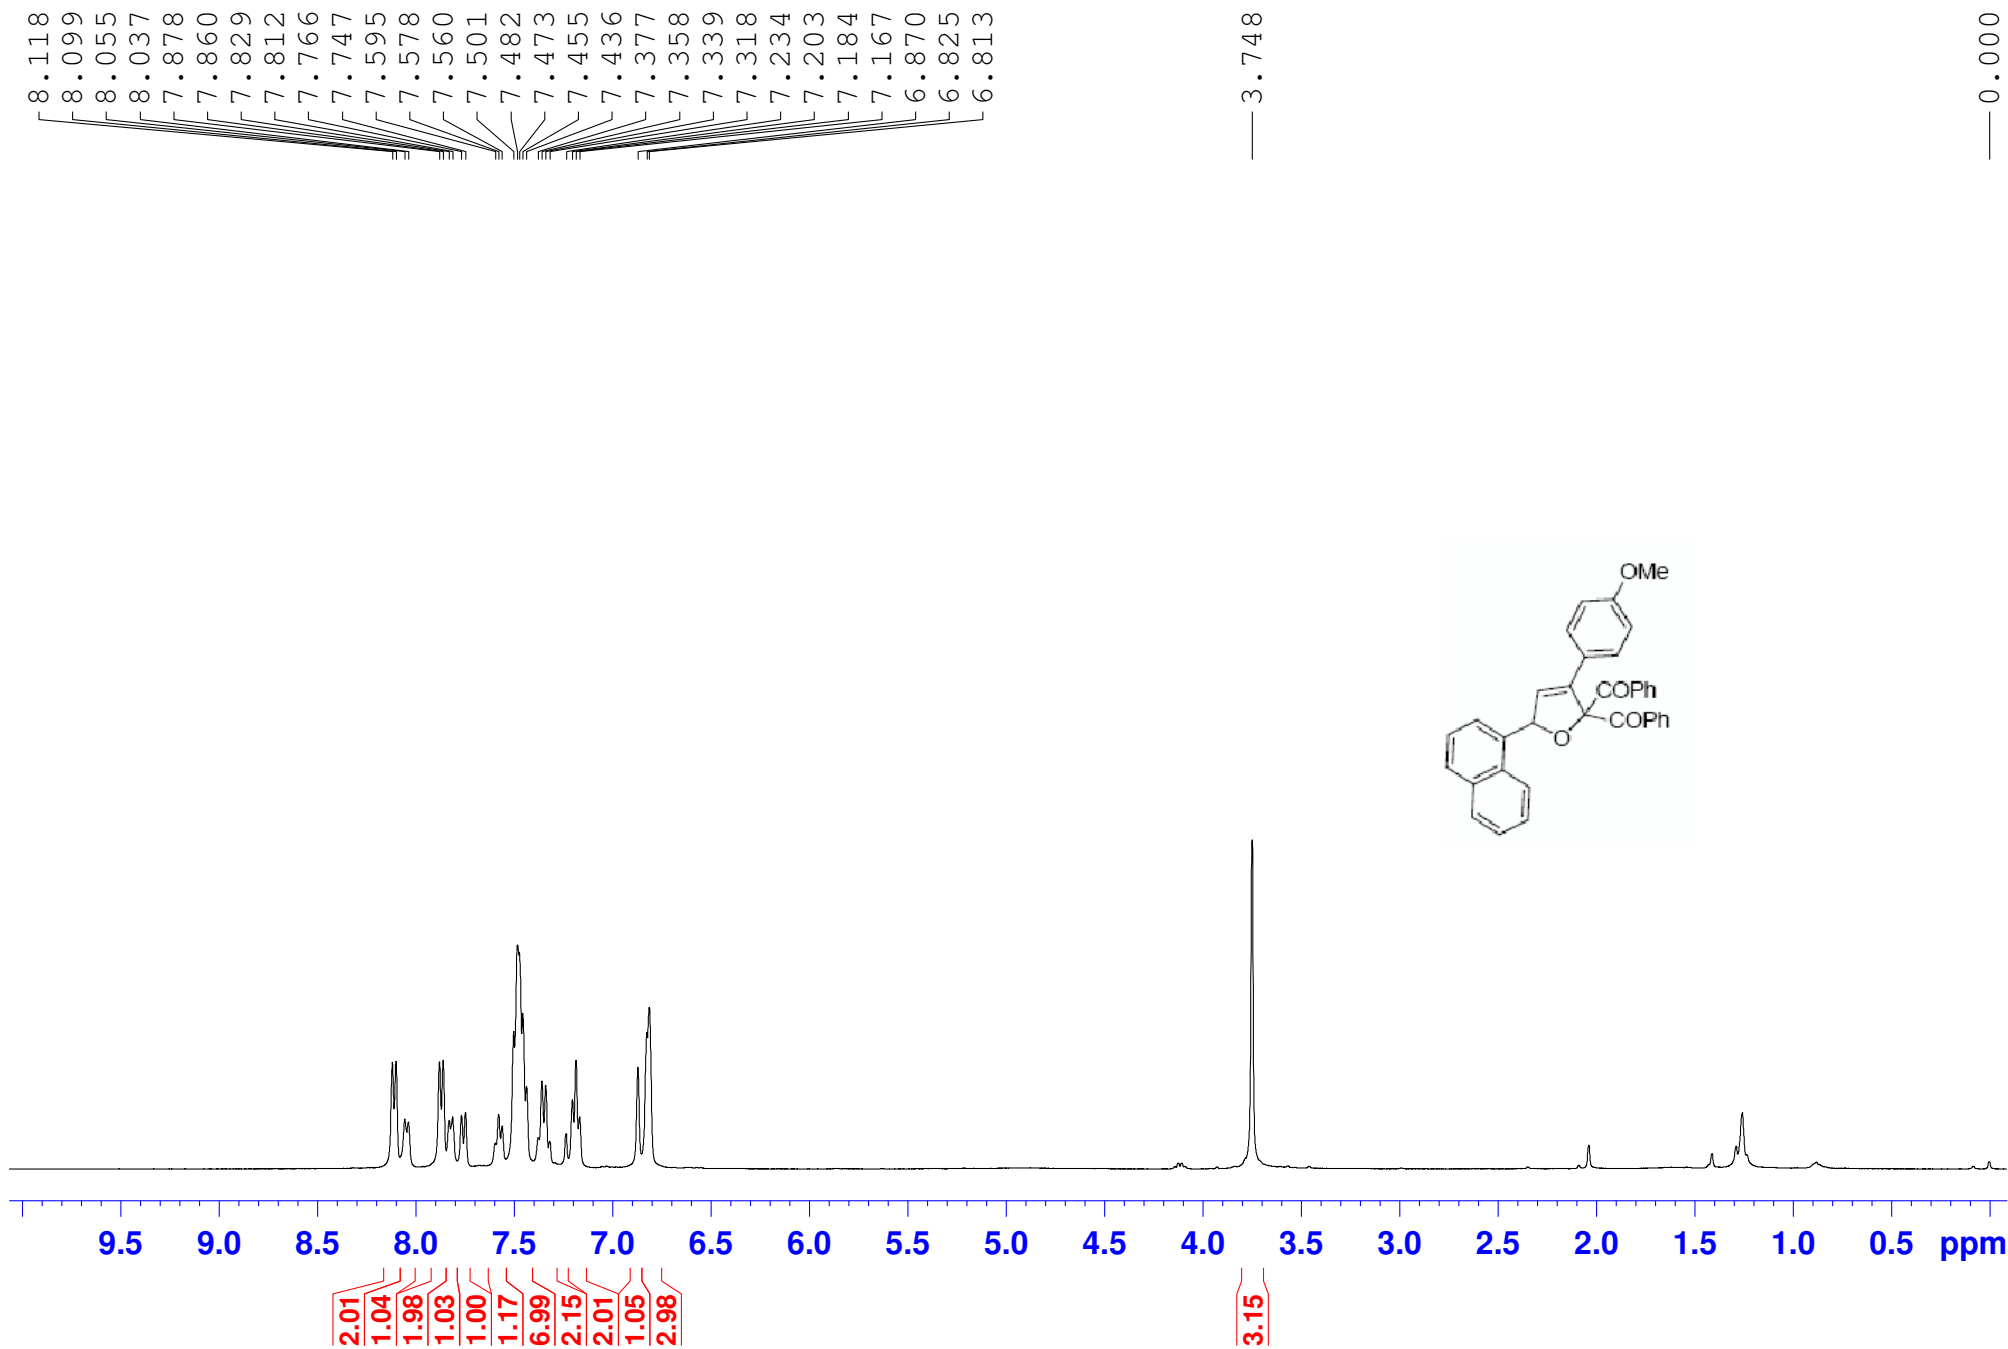

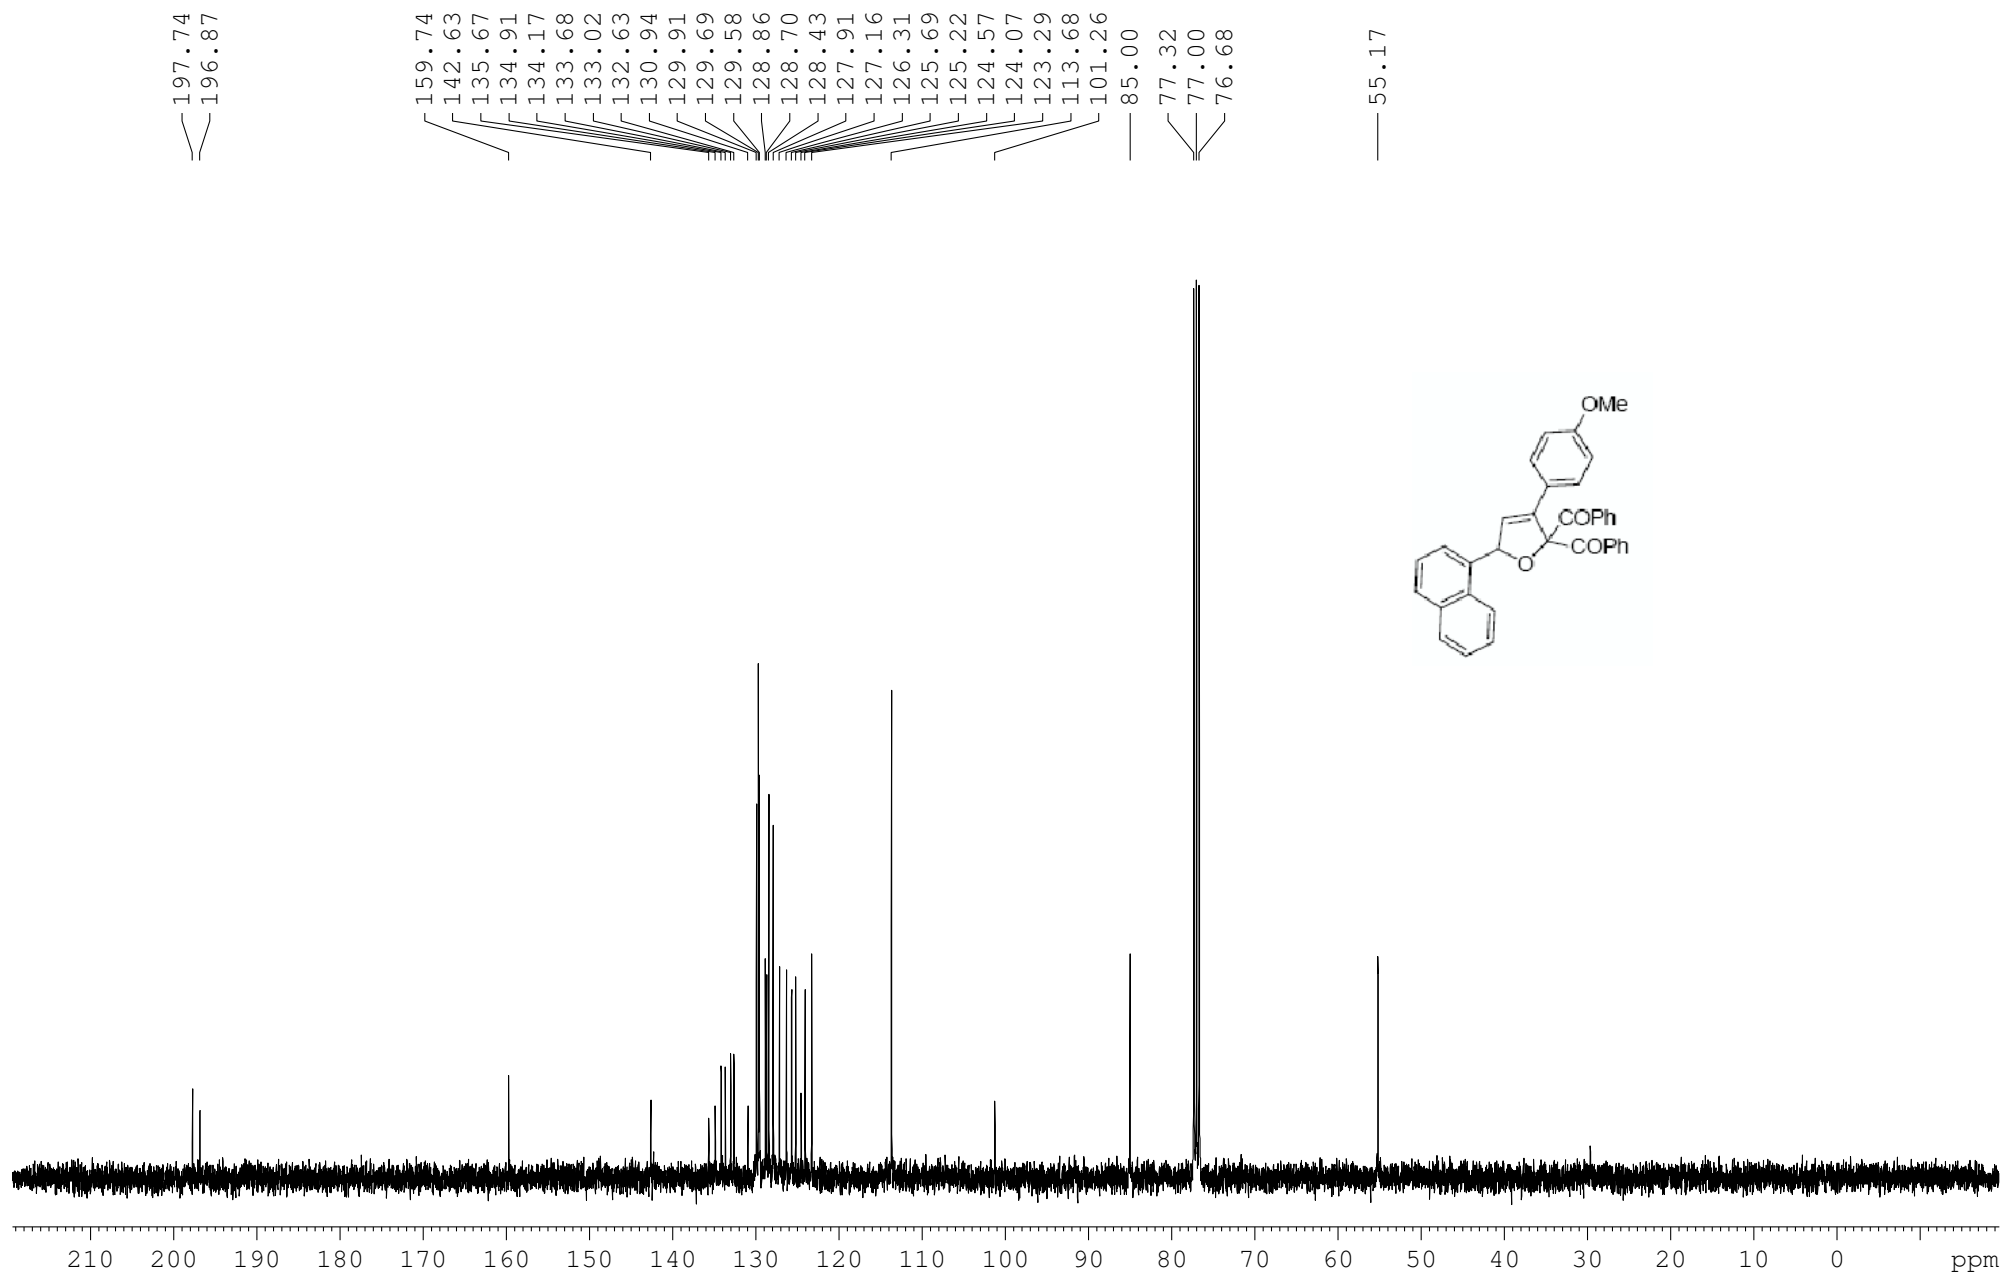

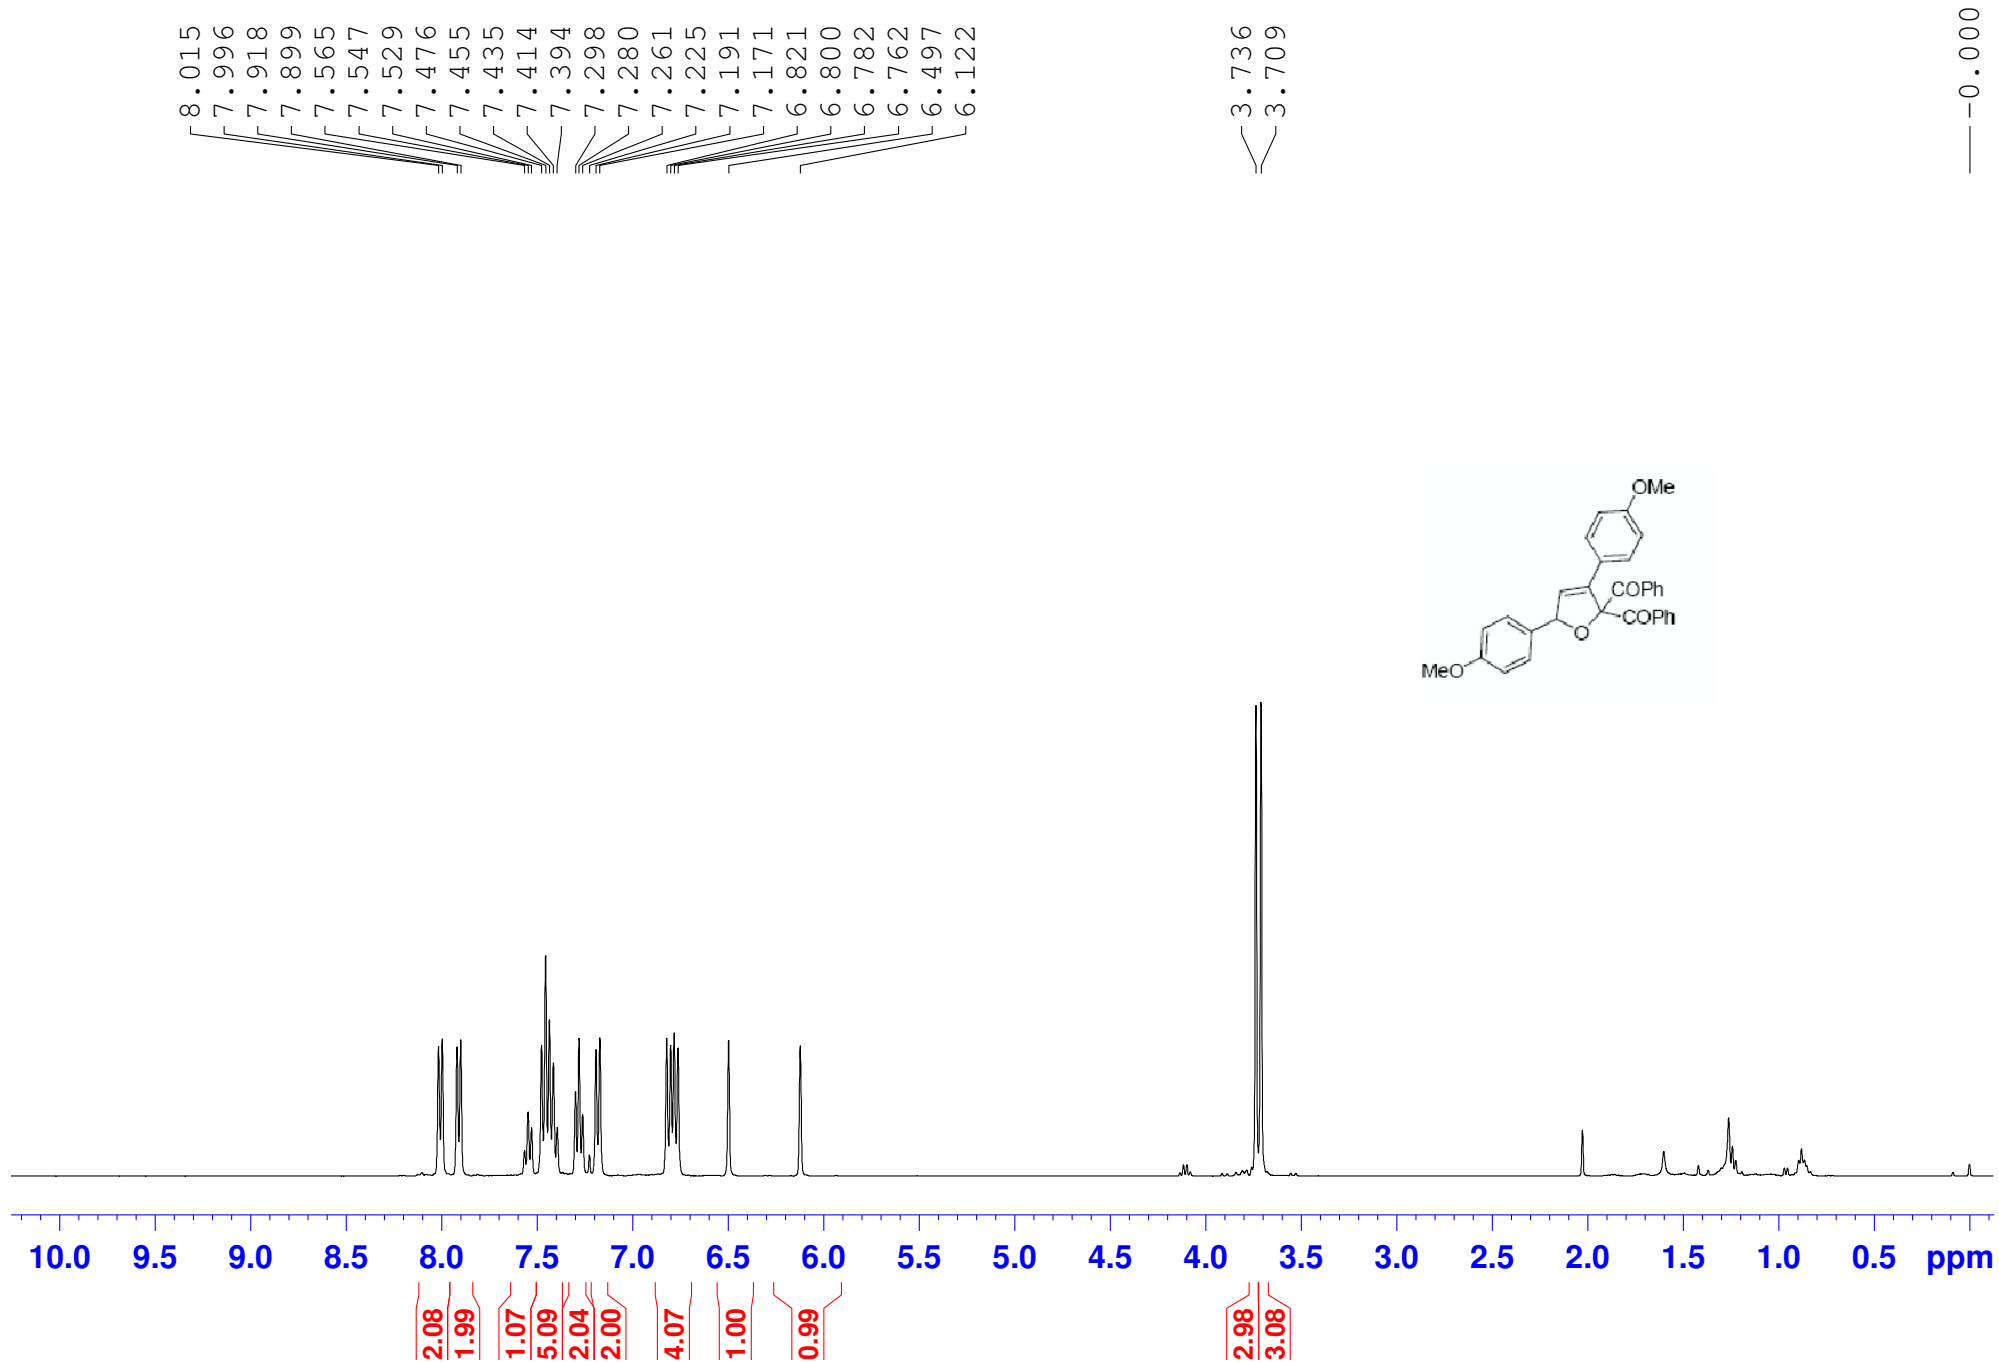

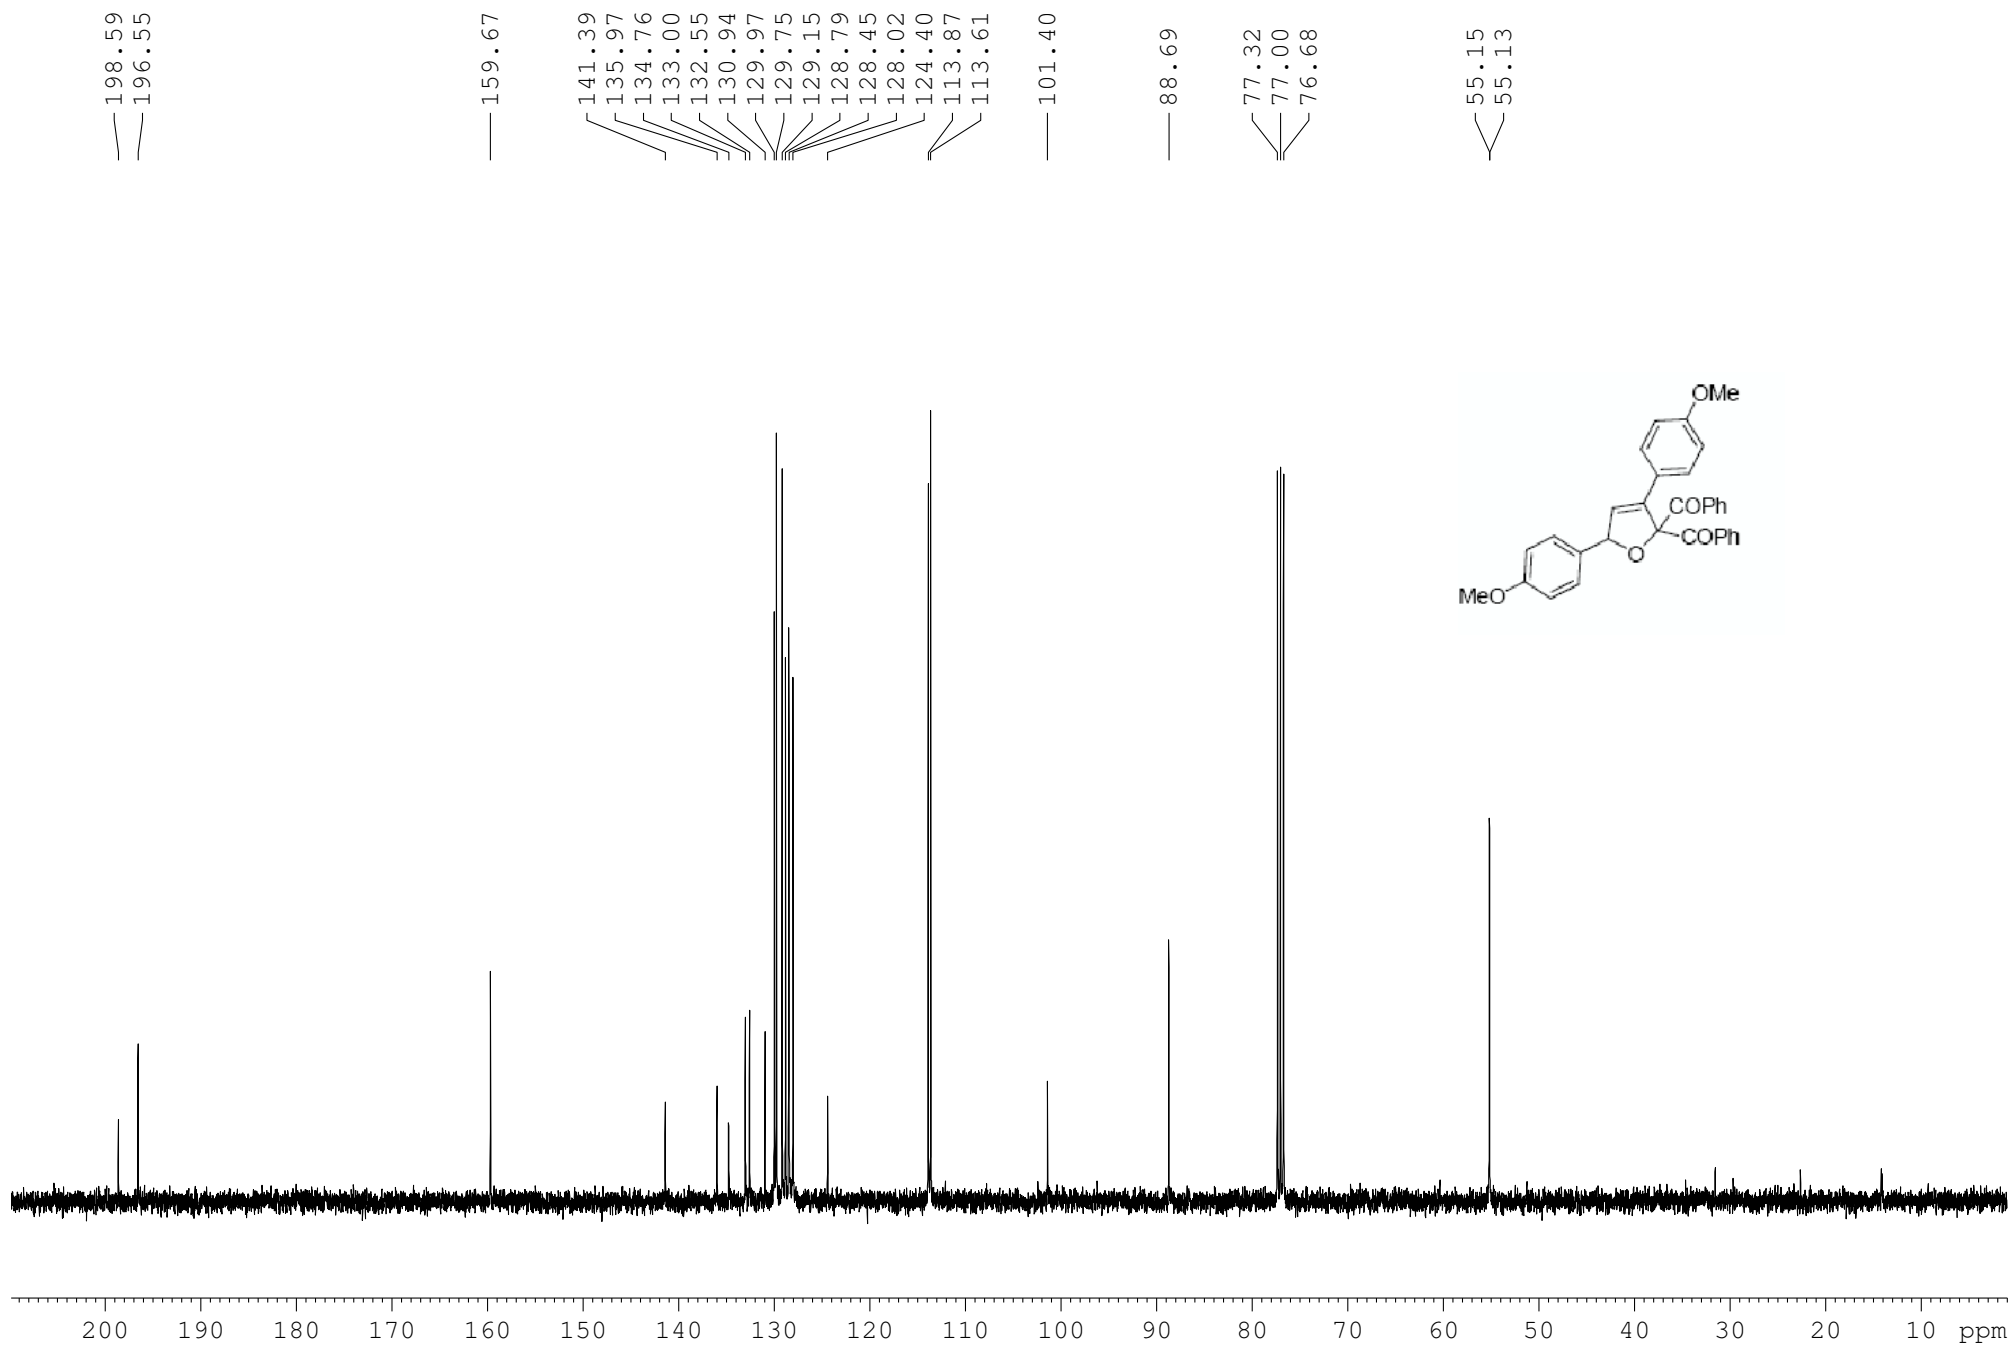

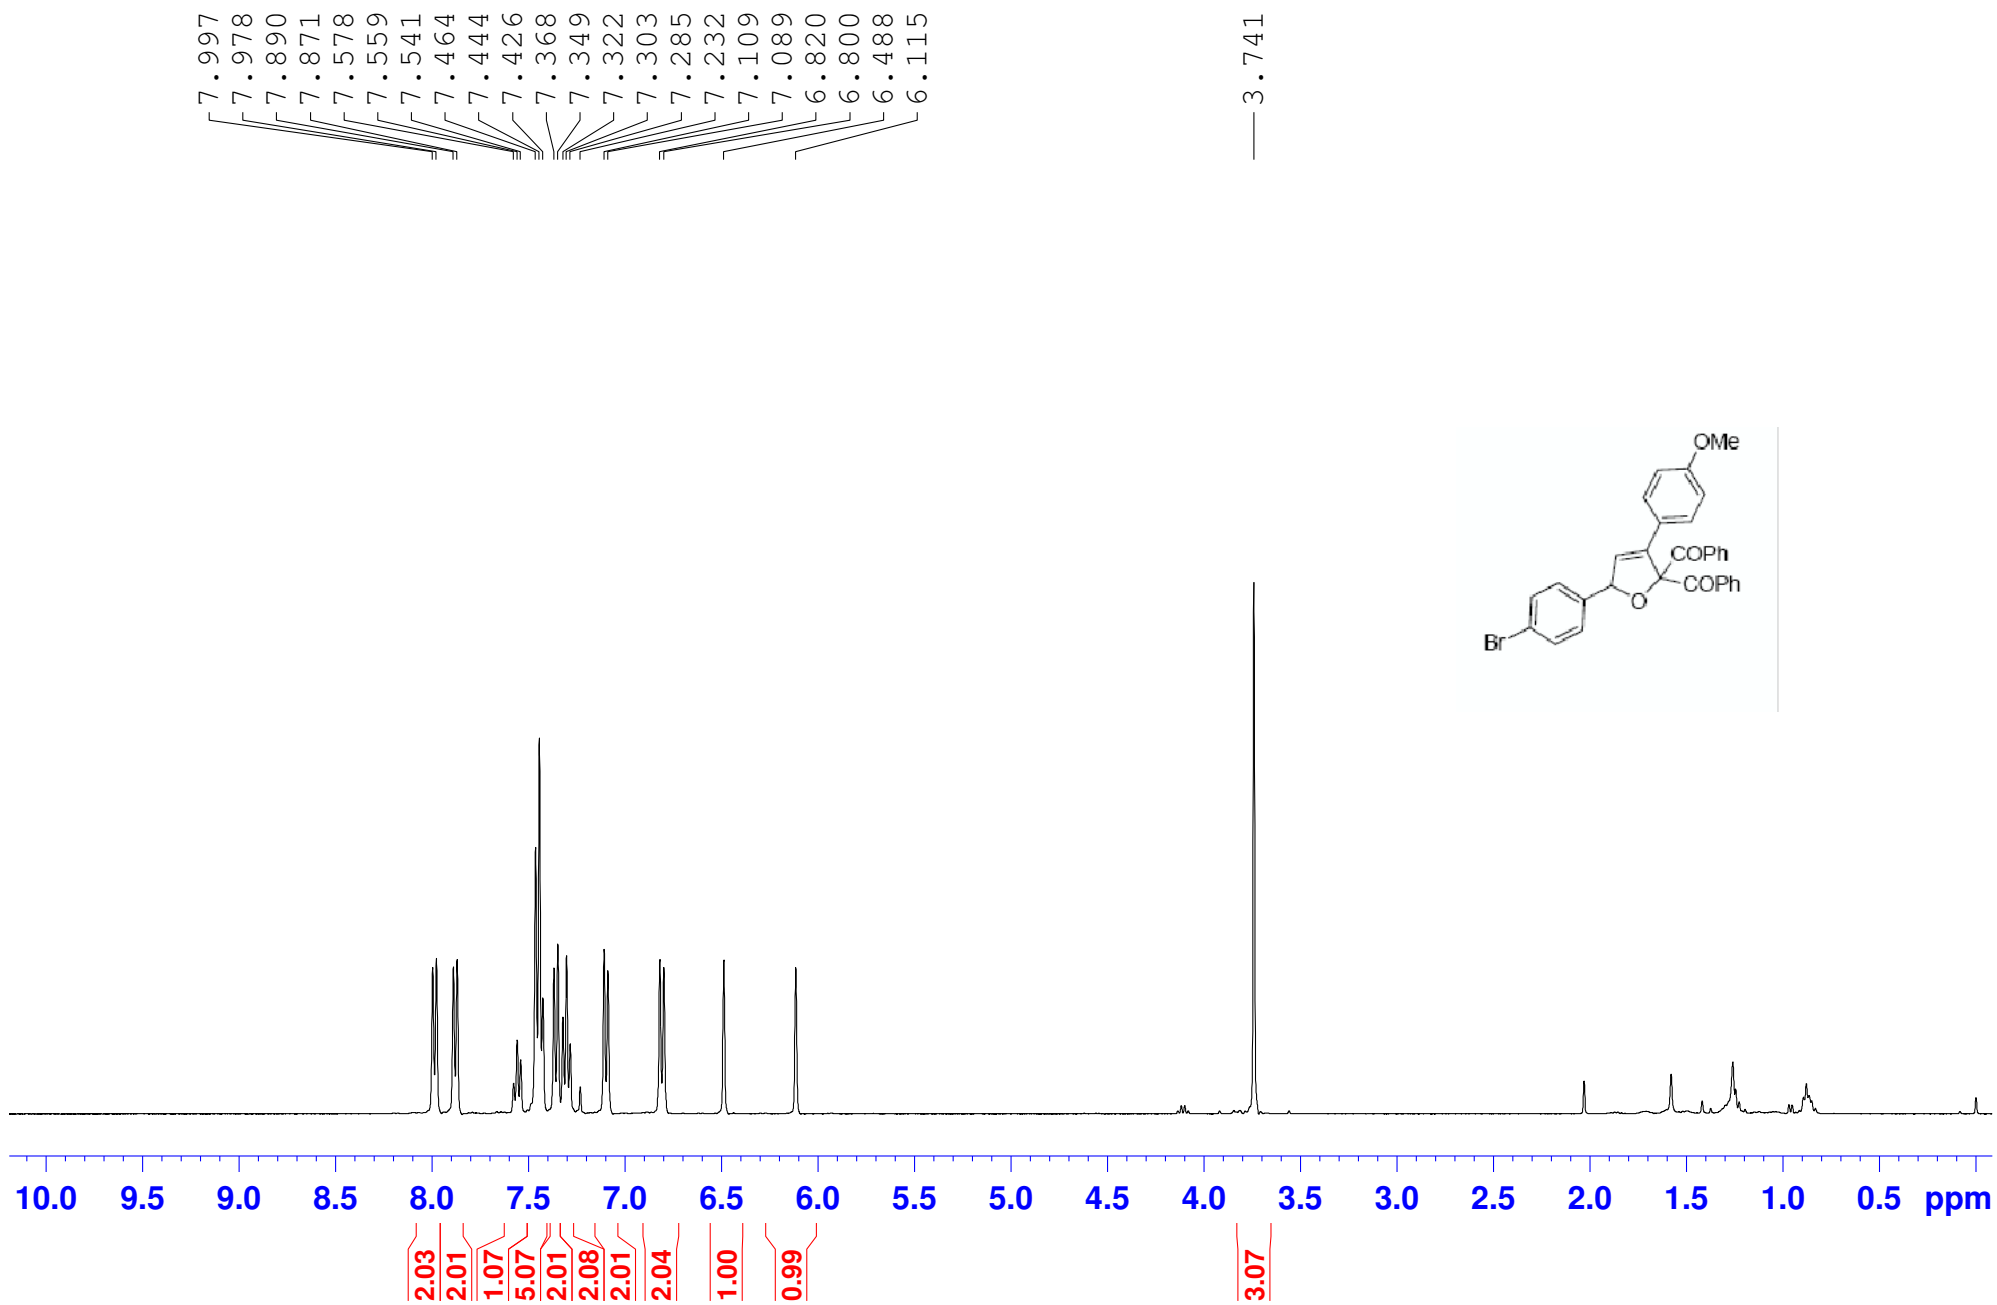

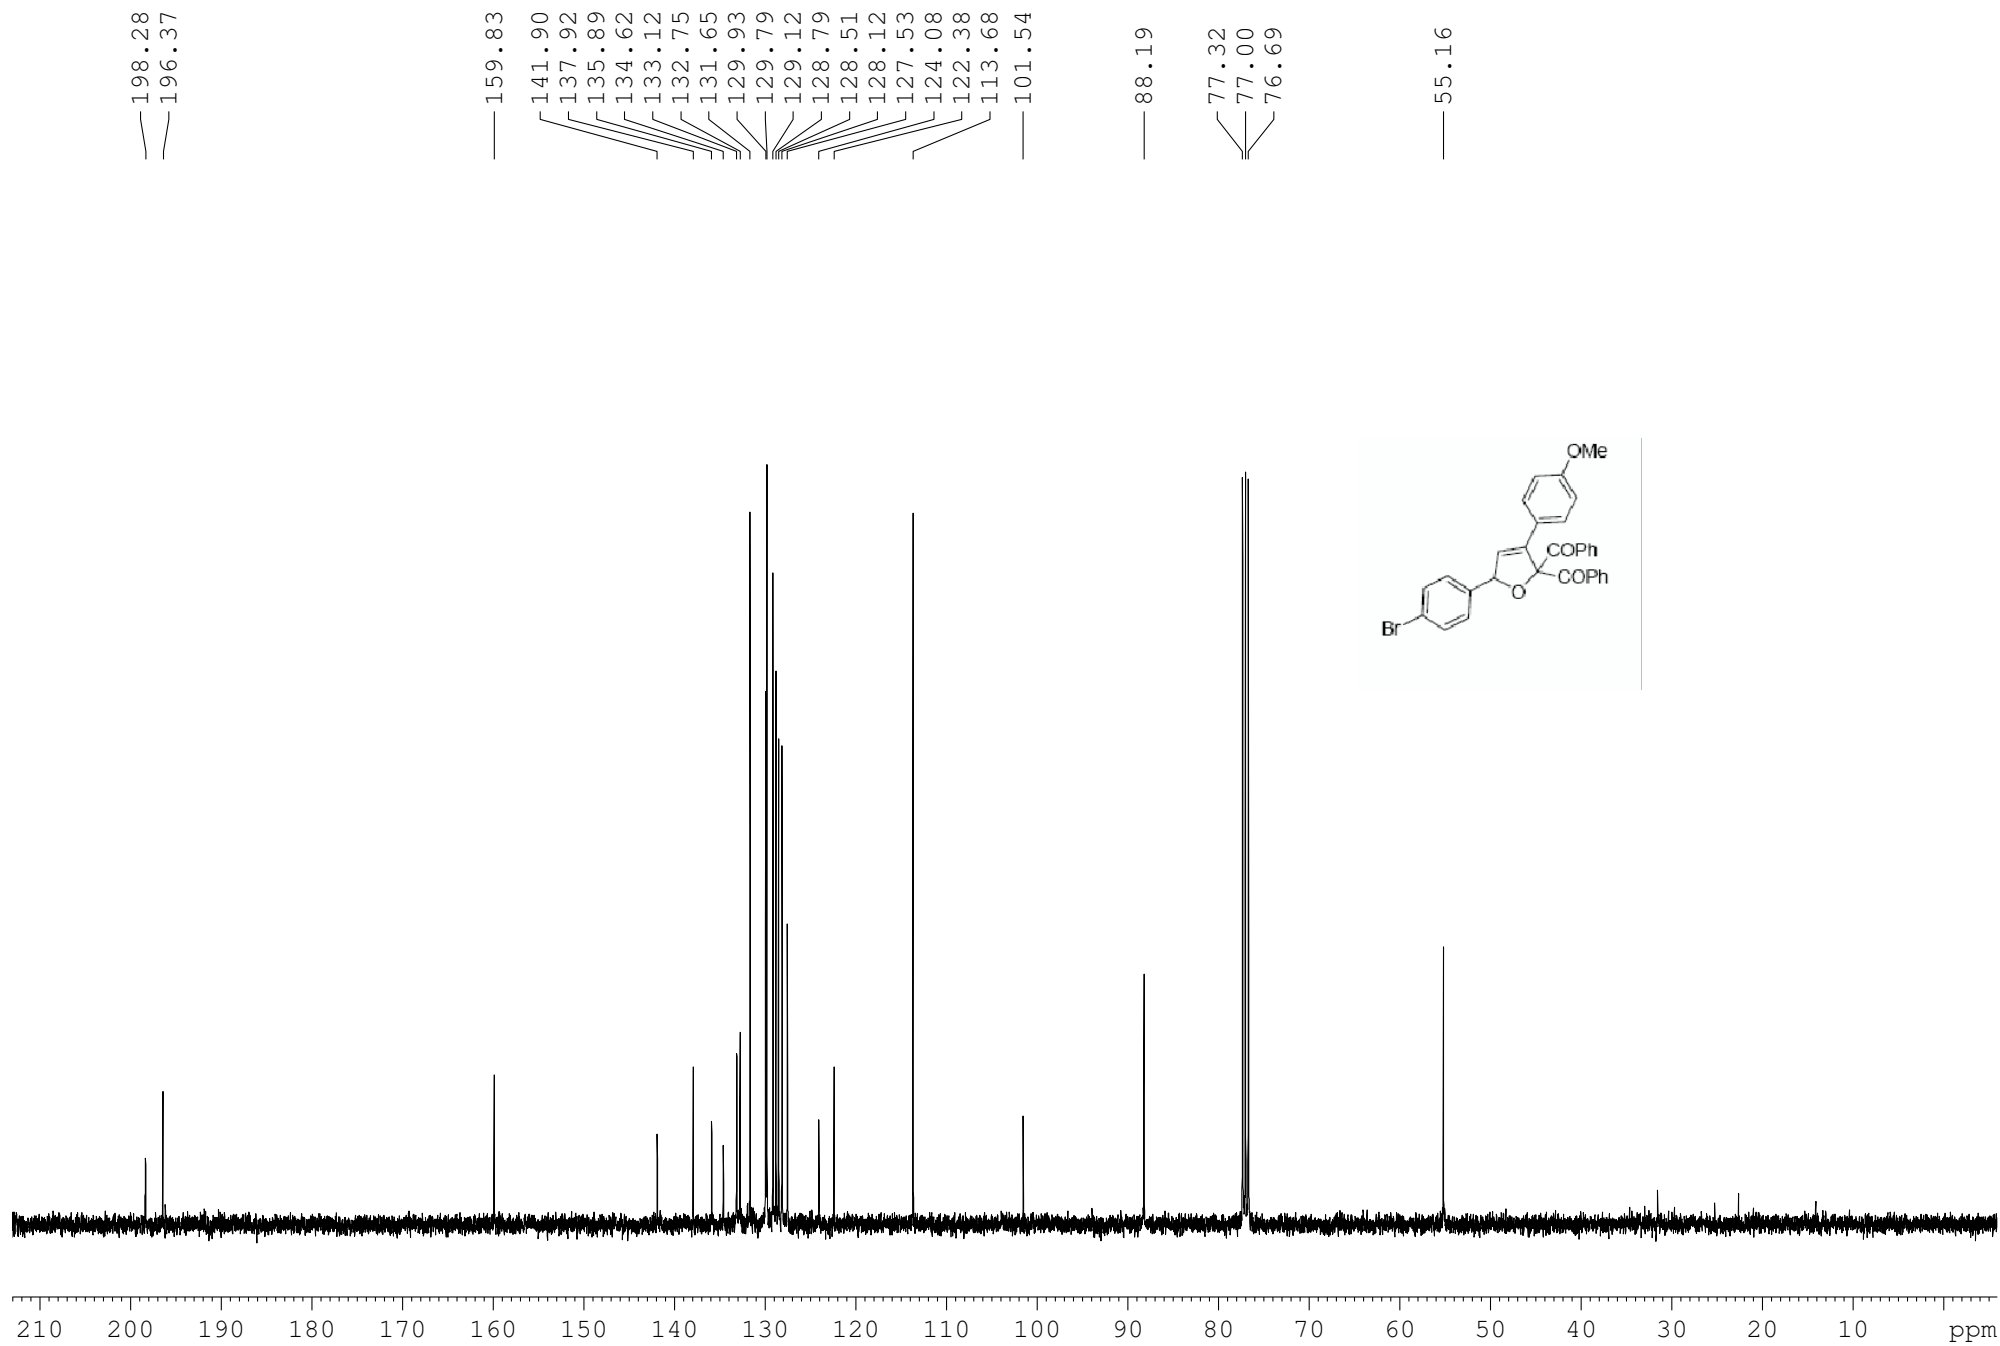

7.447  
7.428  
7.399  
7.364  
7.247  
6.853  
6.835  
6.400  
6.340  
6.114  
6.058

4.291  
4.274  
4.256  
4.238  
3.789

2.365  
2.249

1.255  
1.238  
1.221  
1.202  
1.184  
1.167

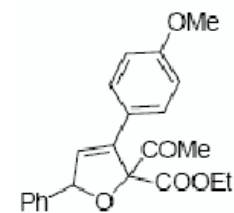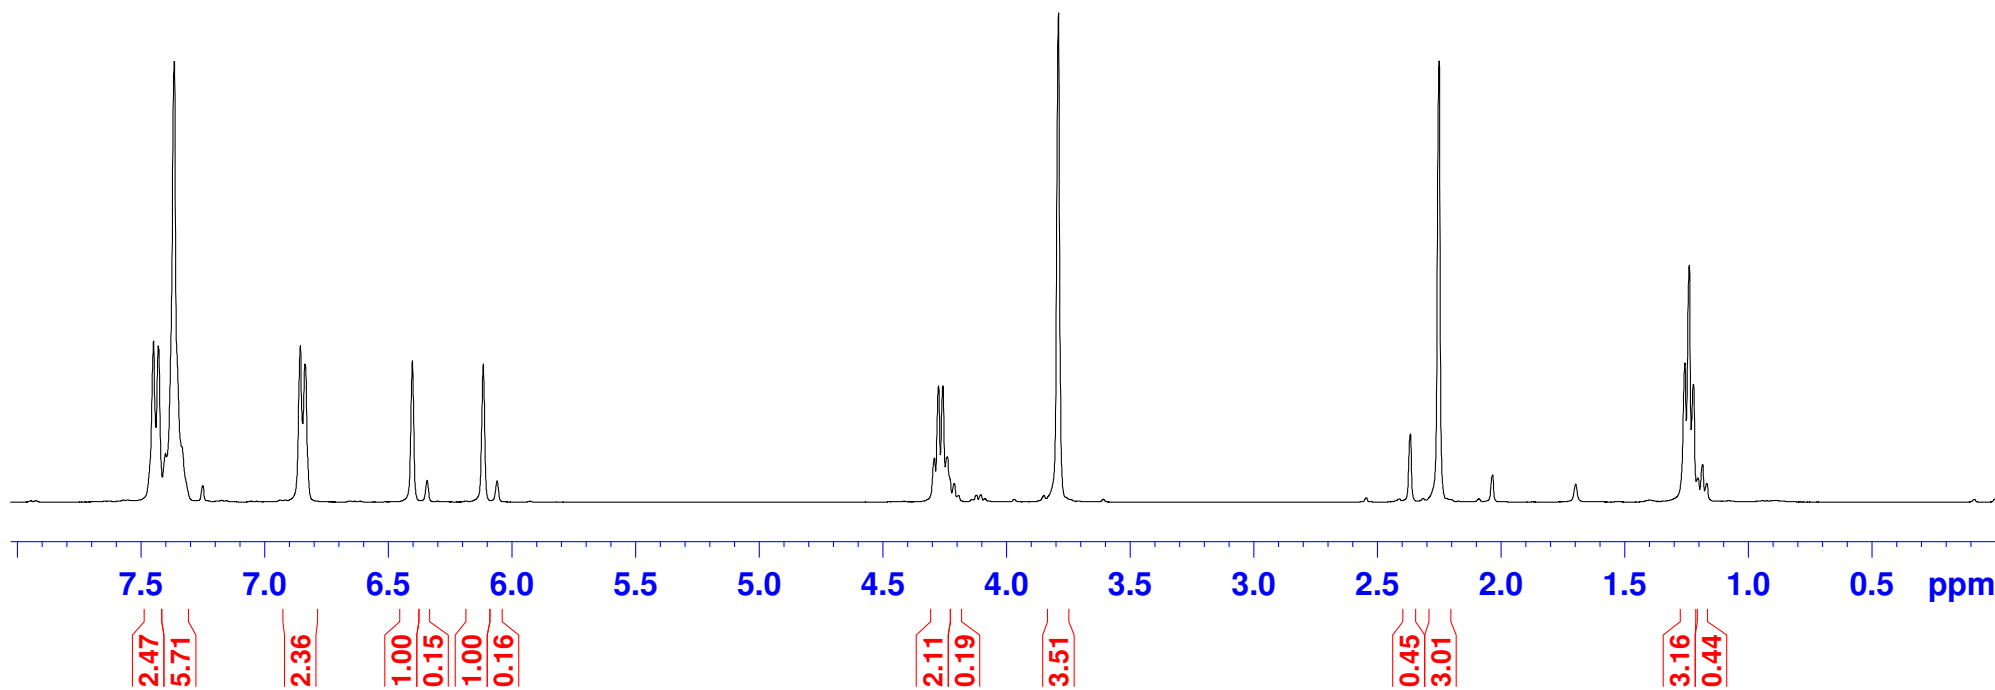

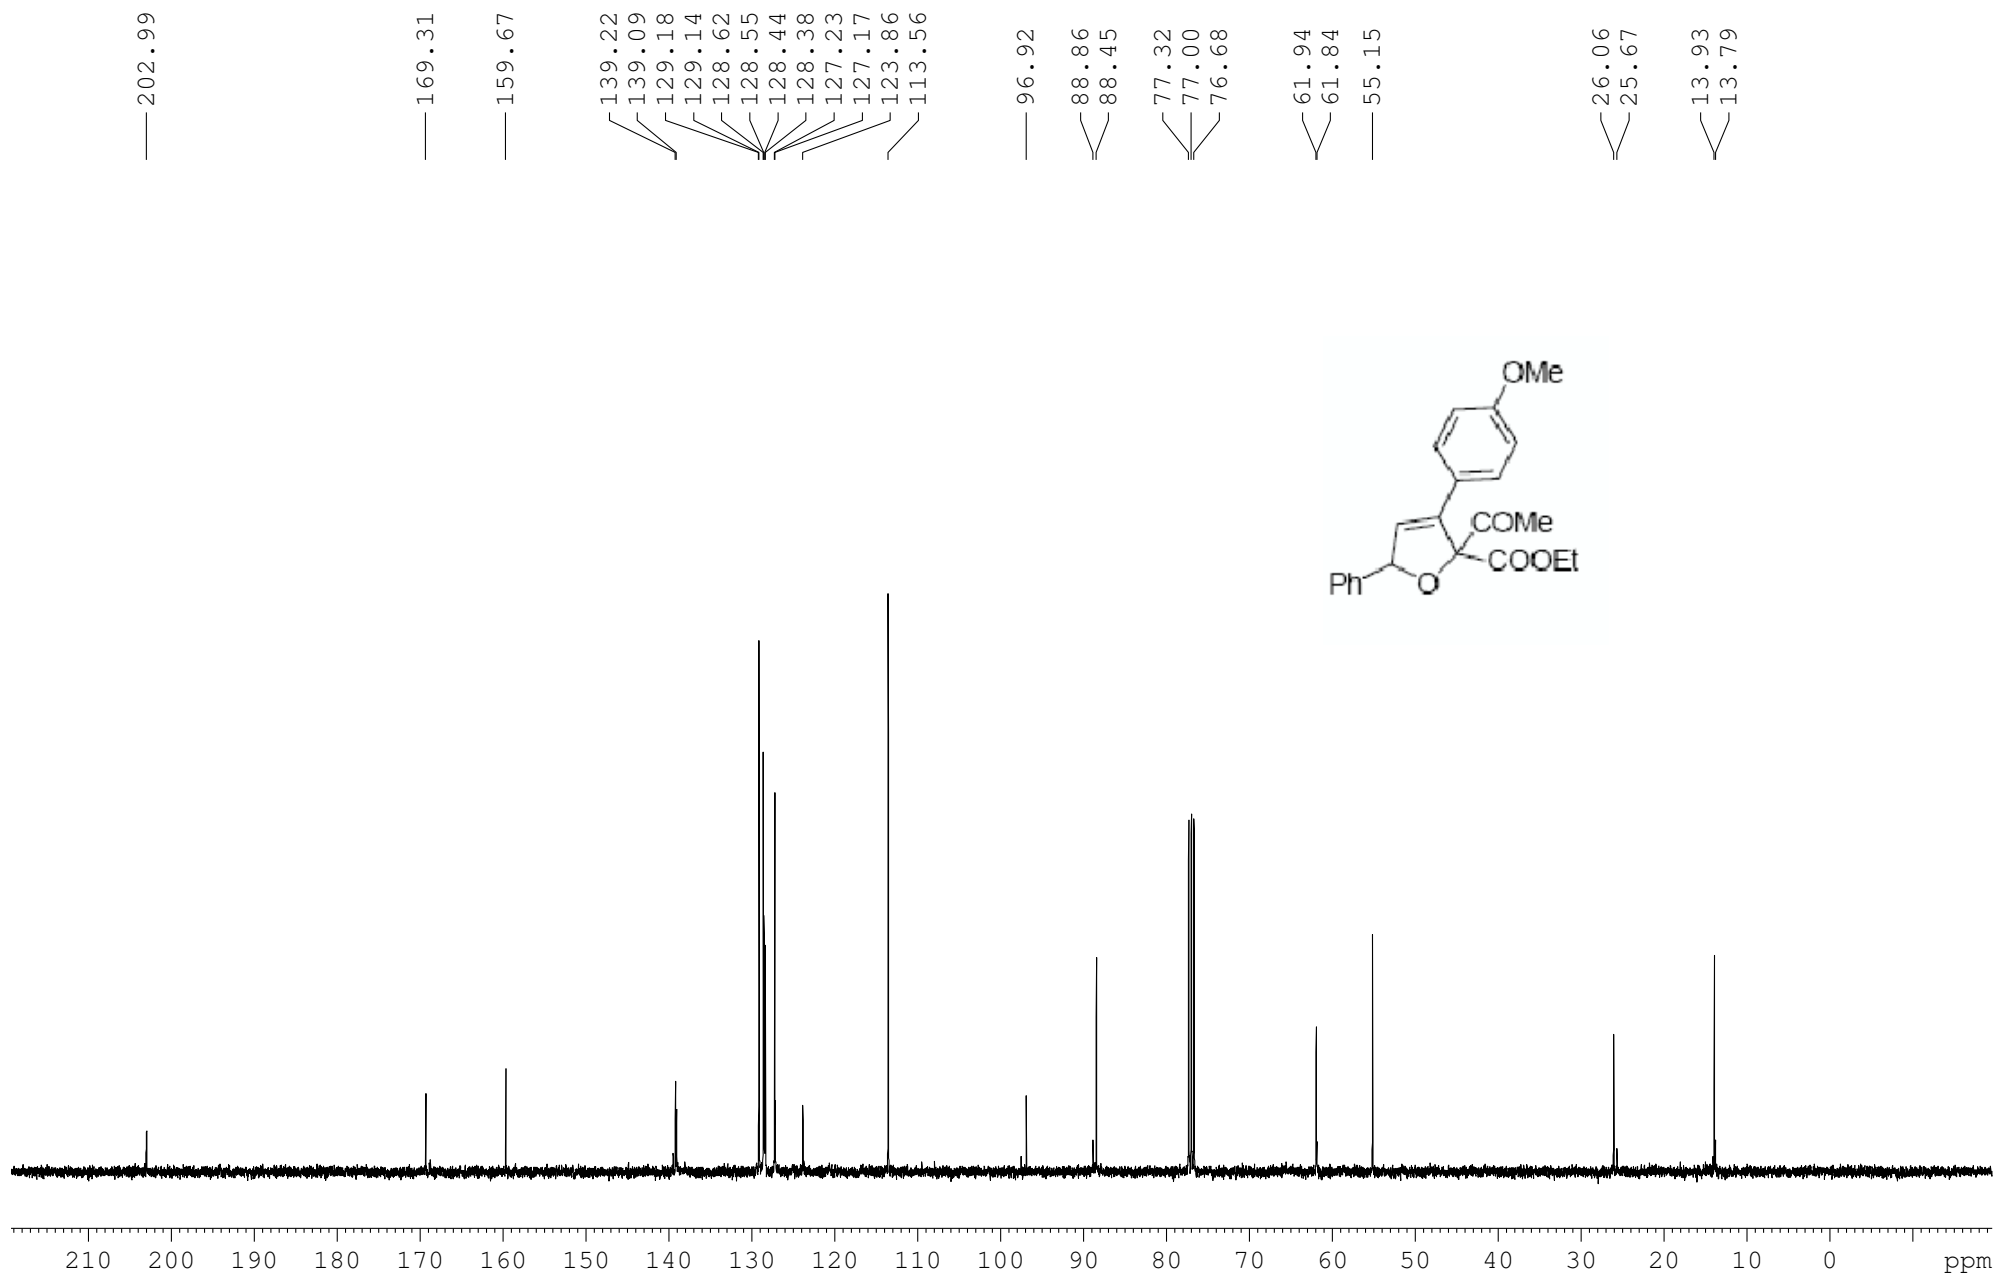



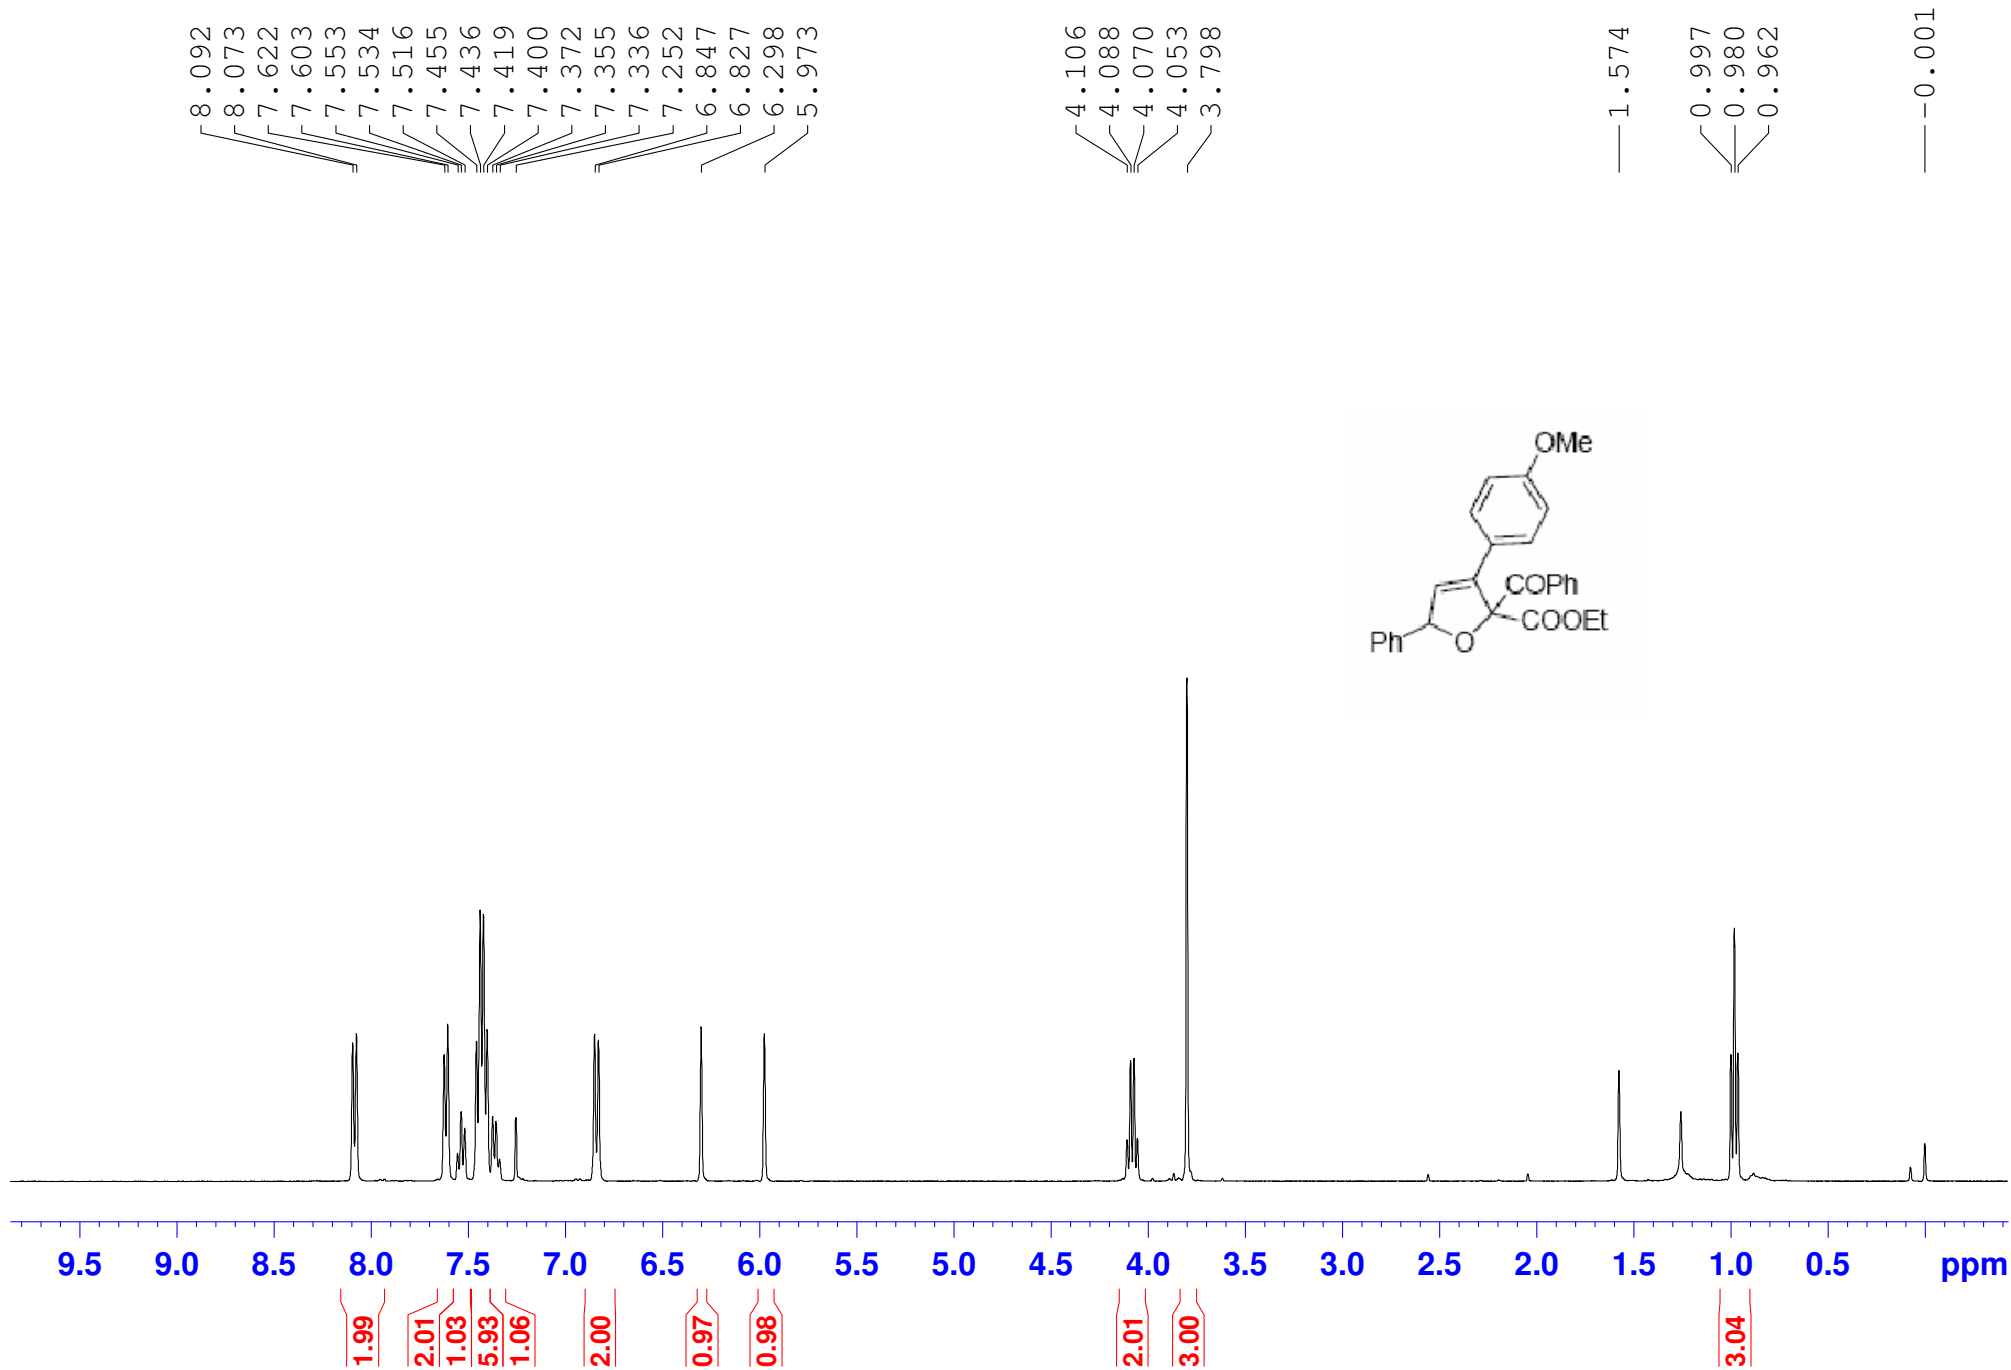

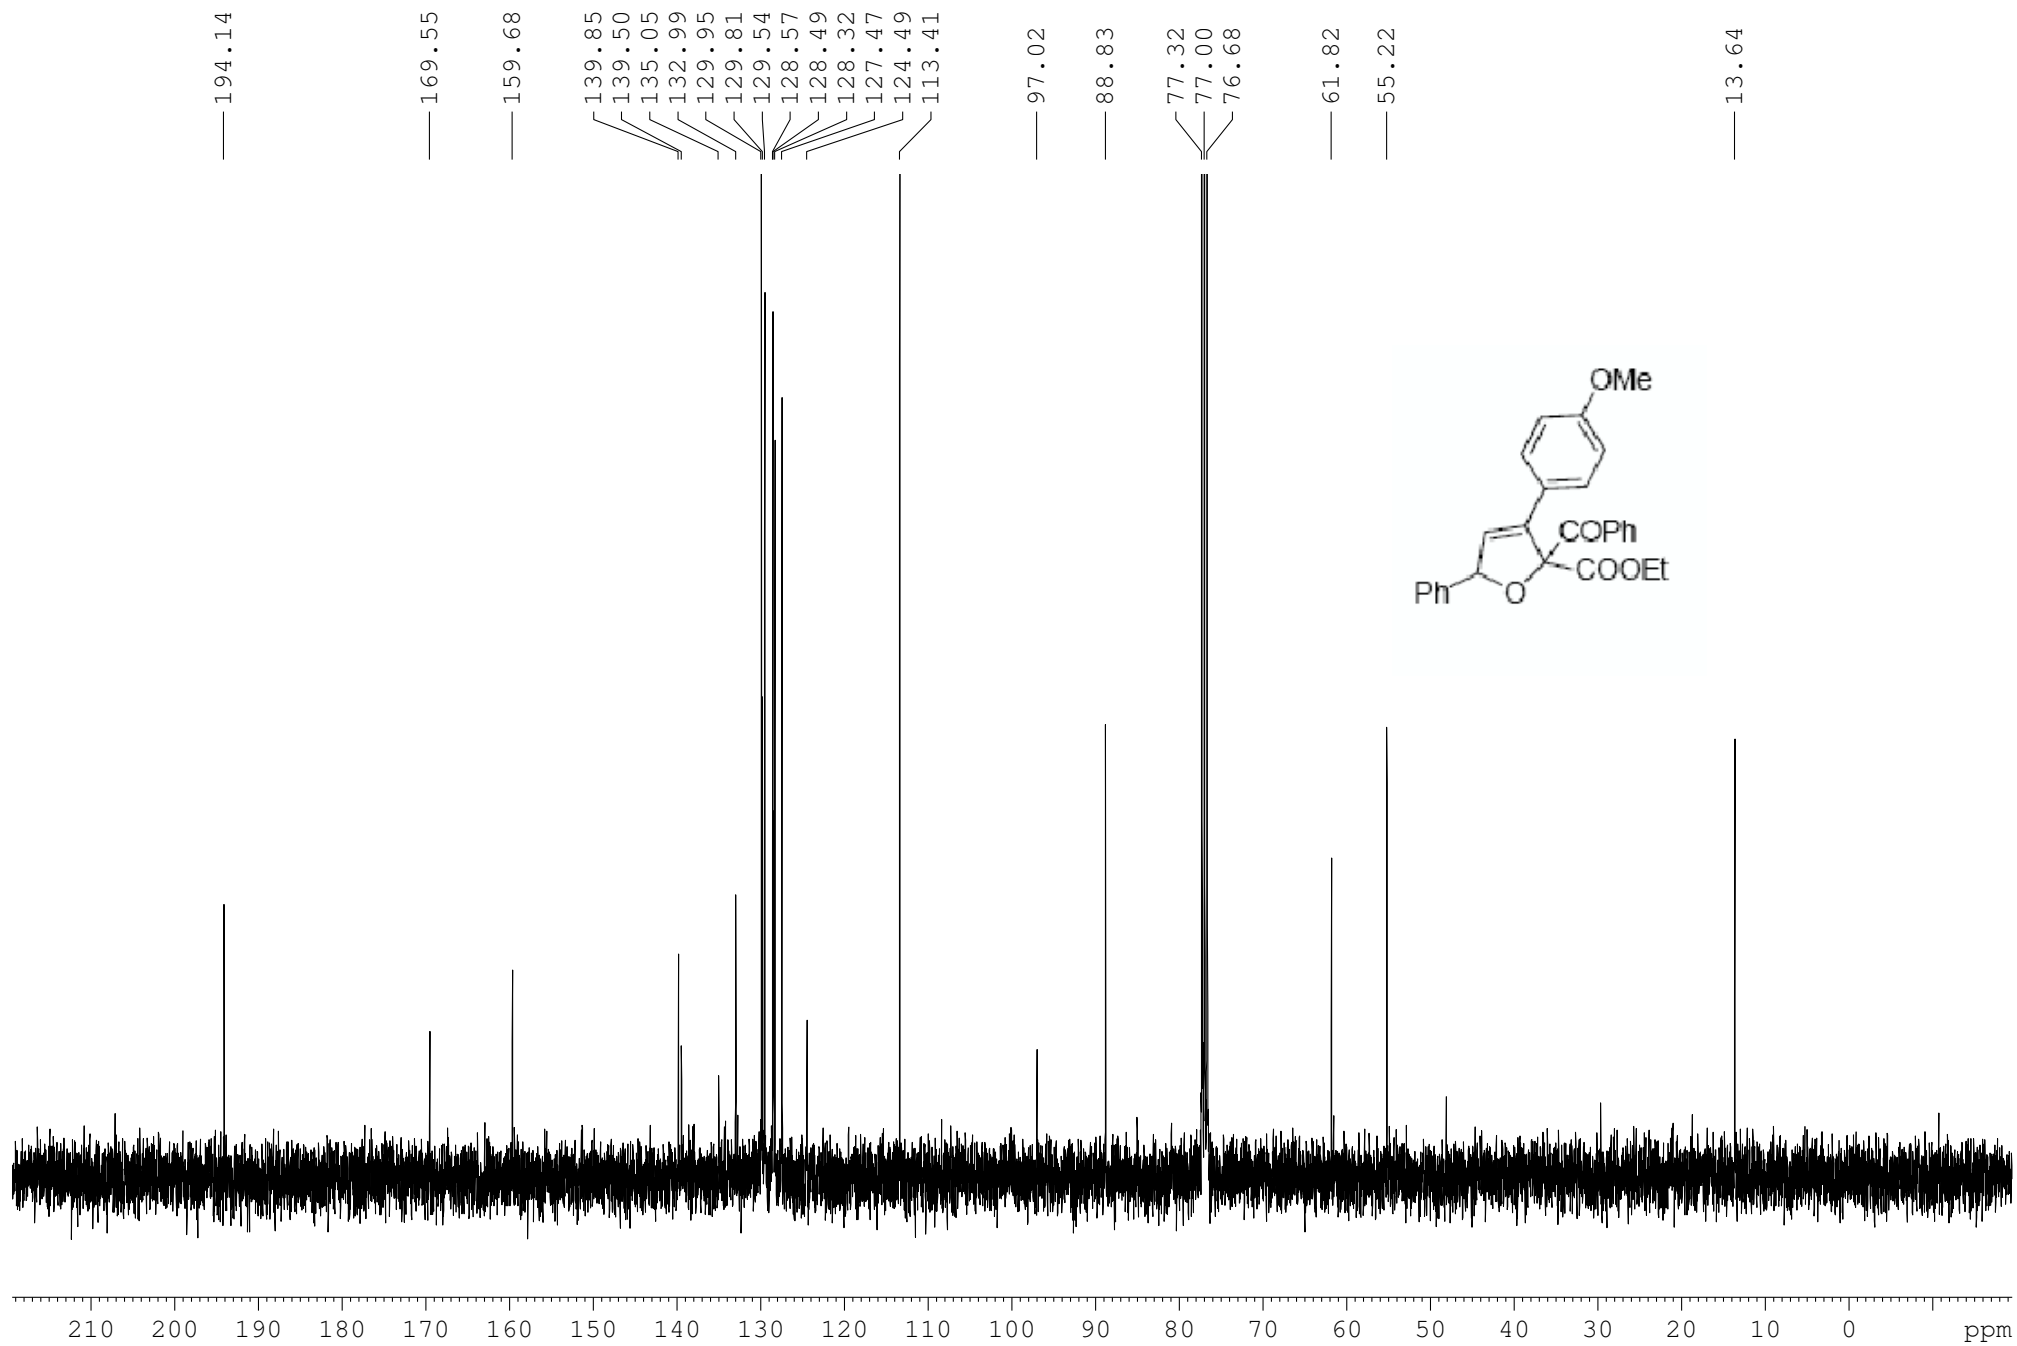

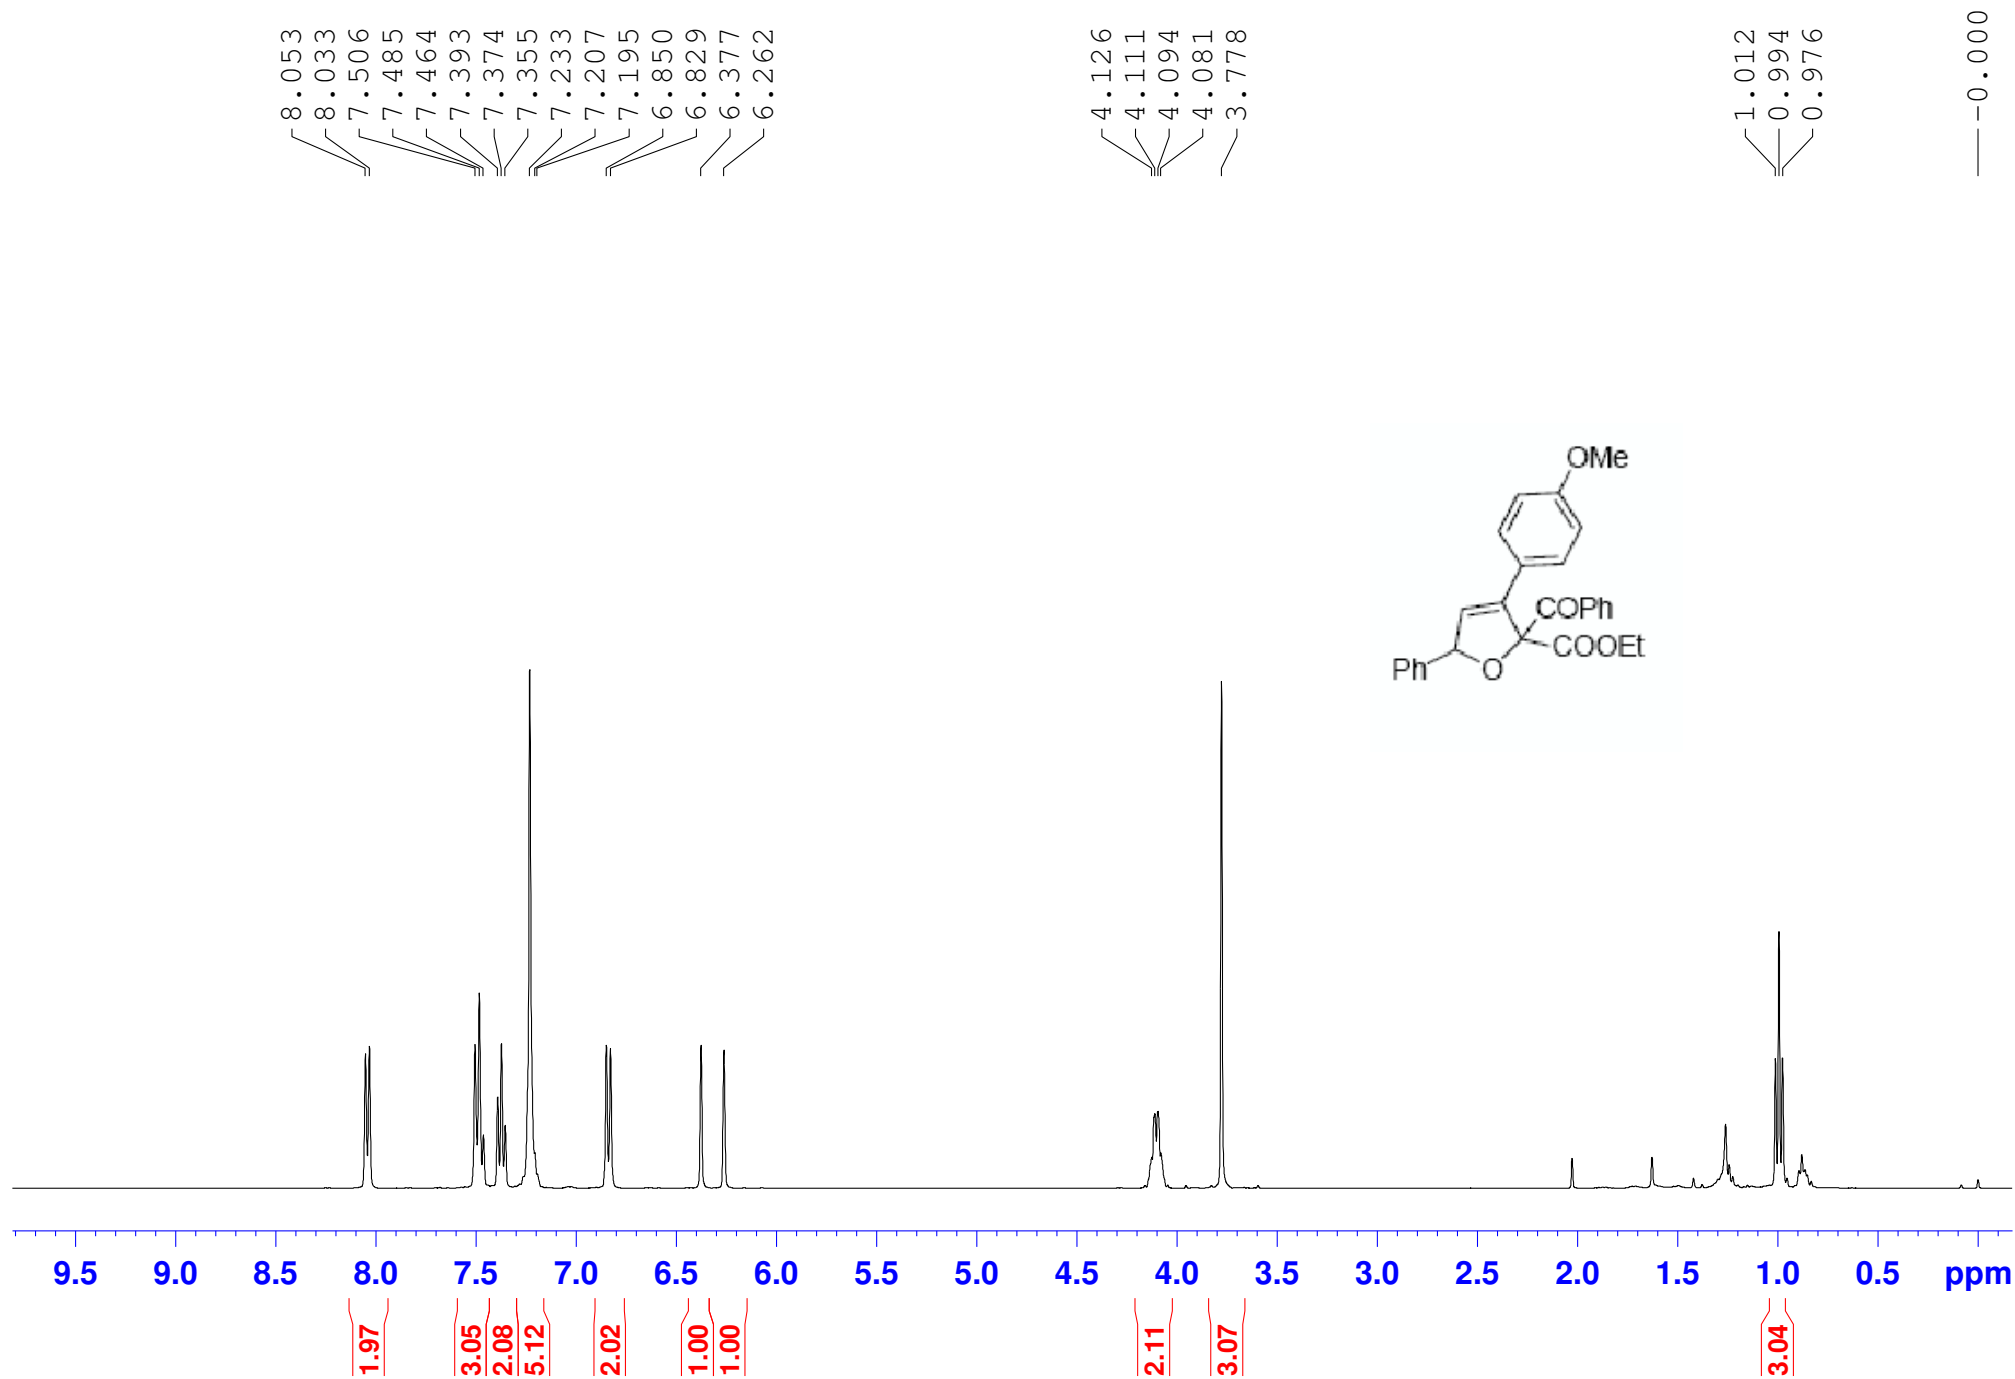

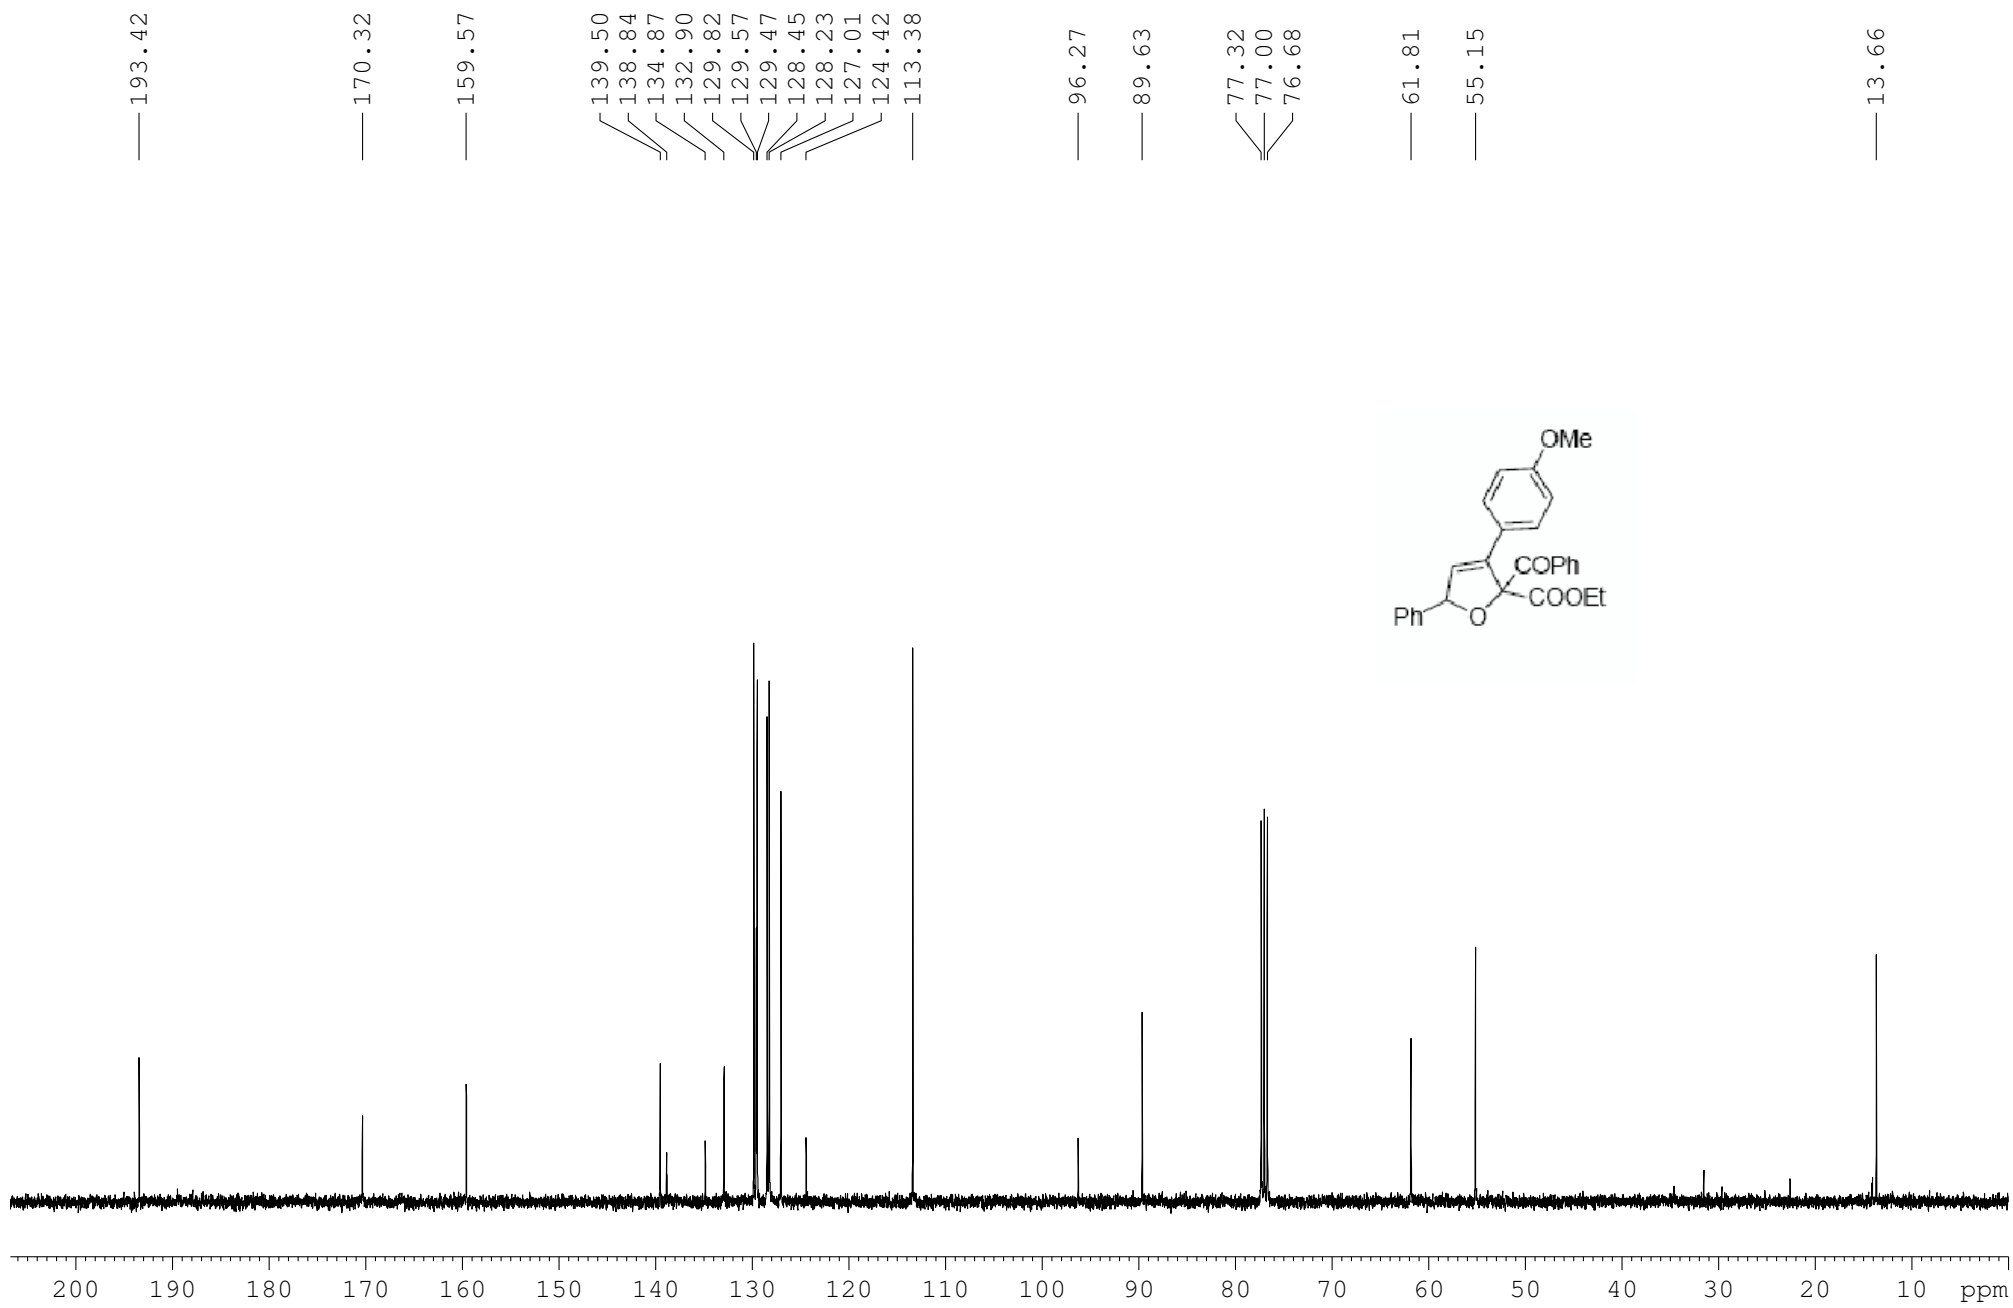

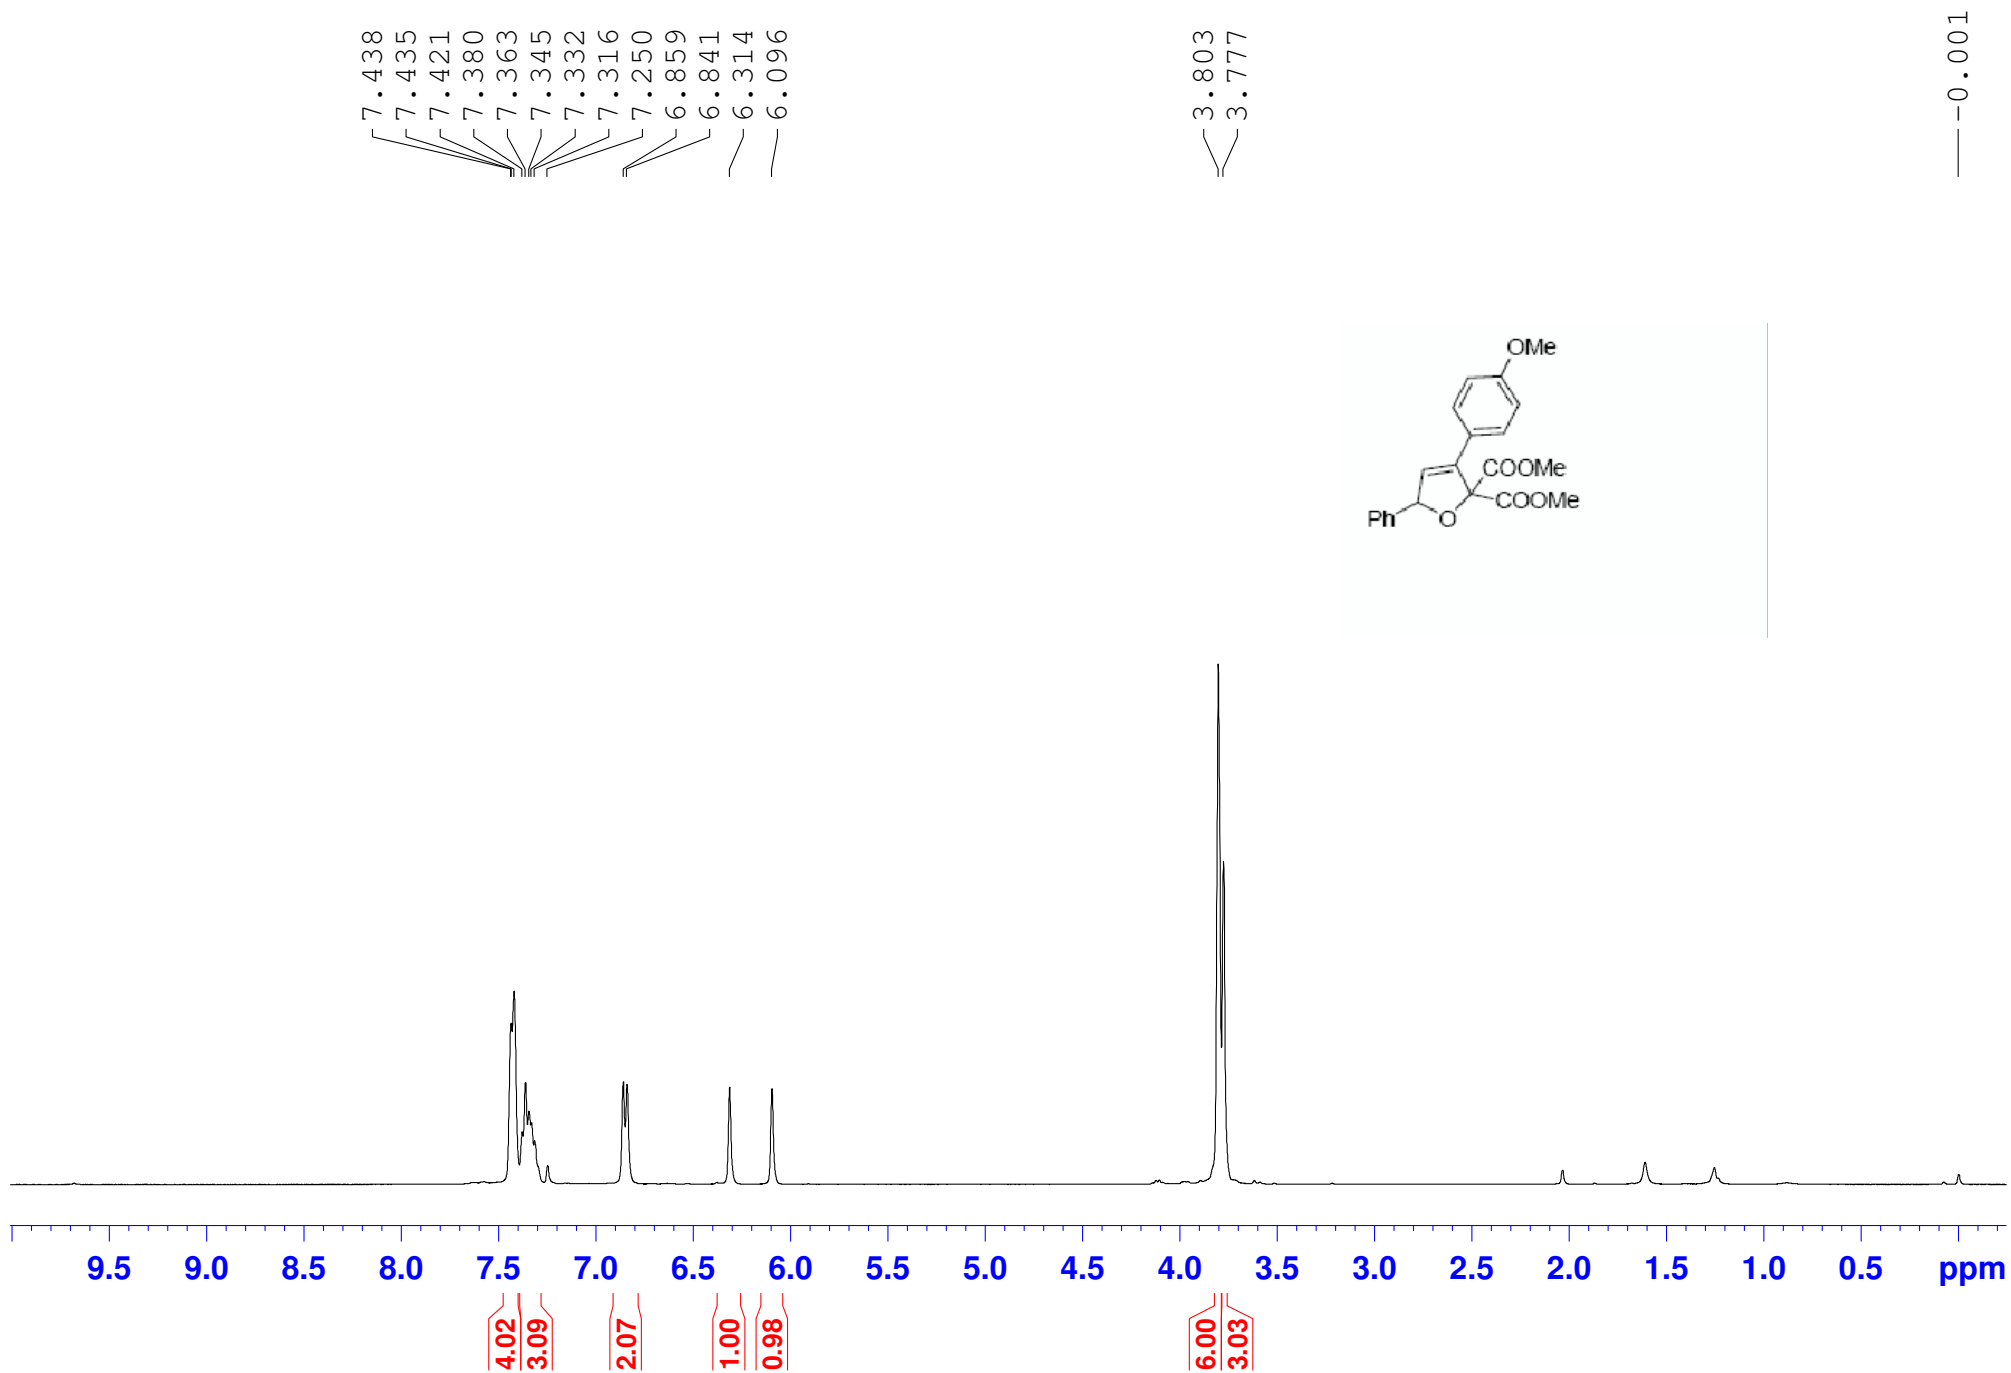

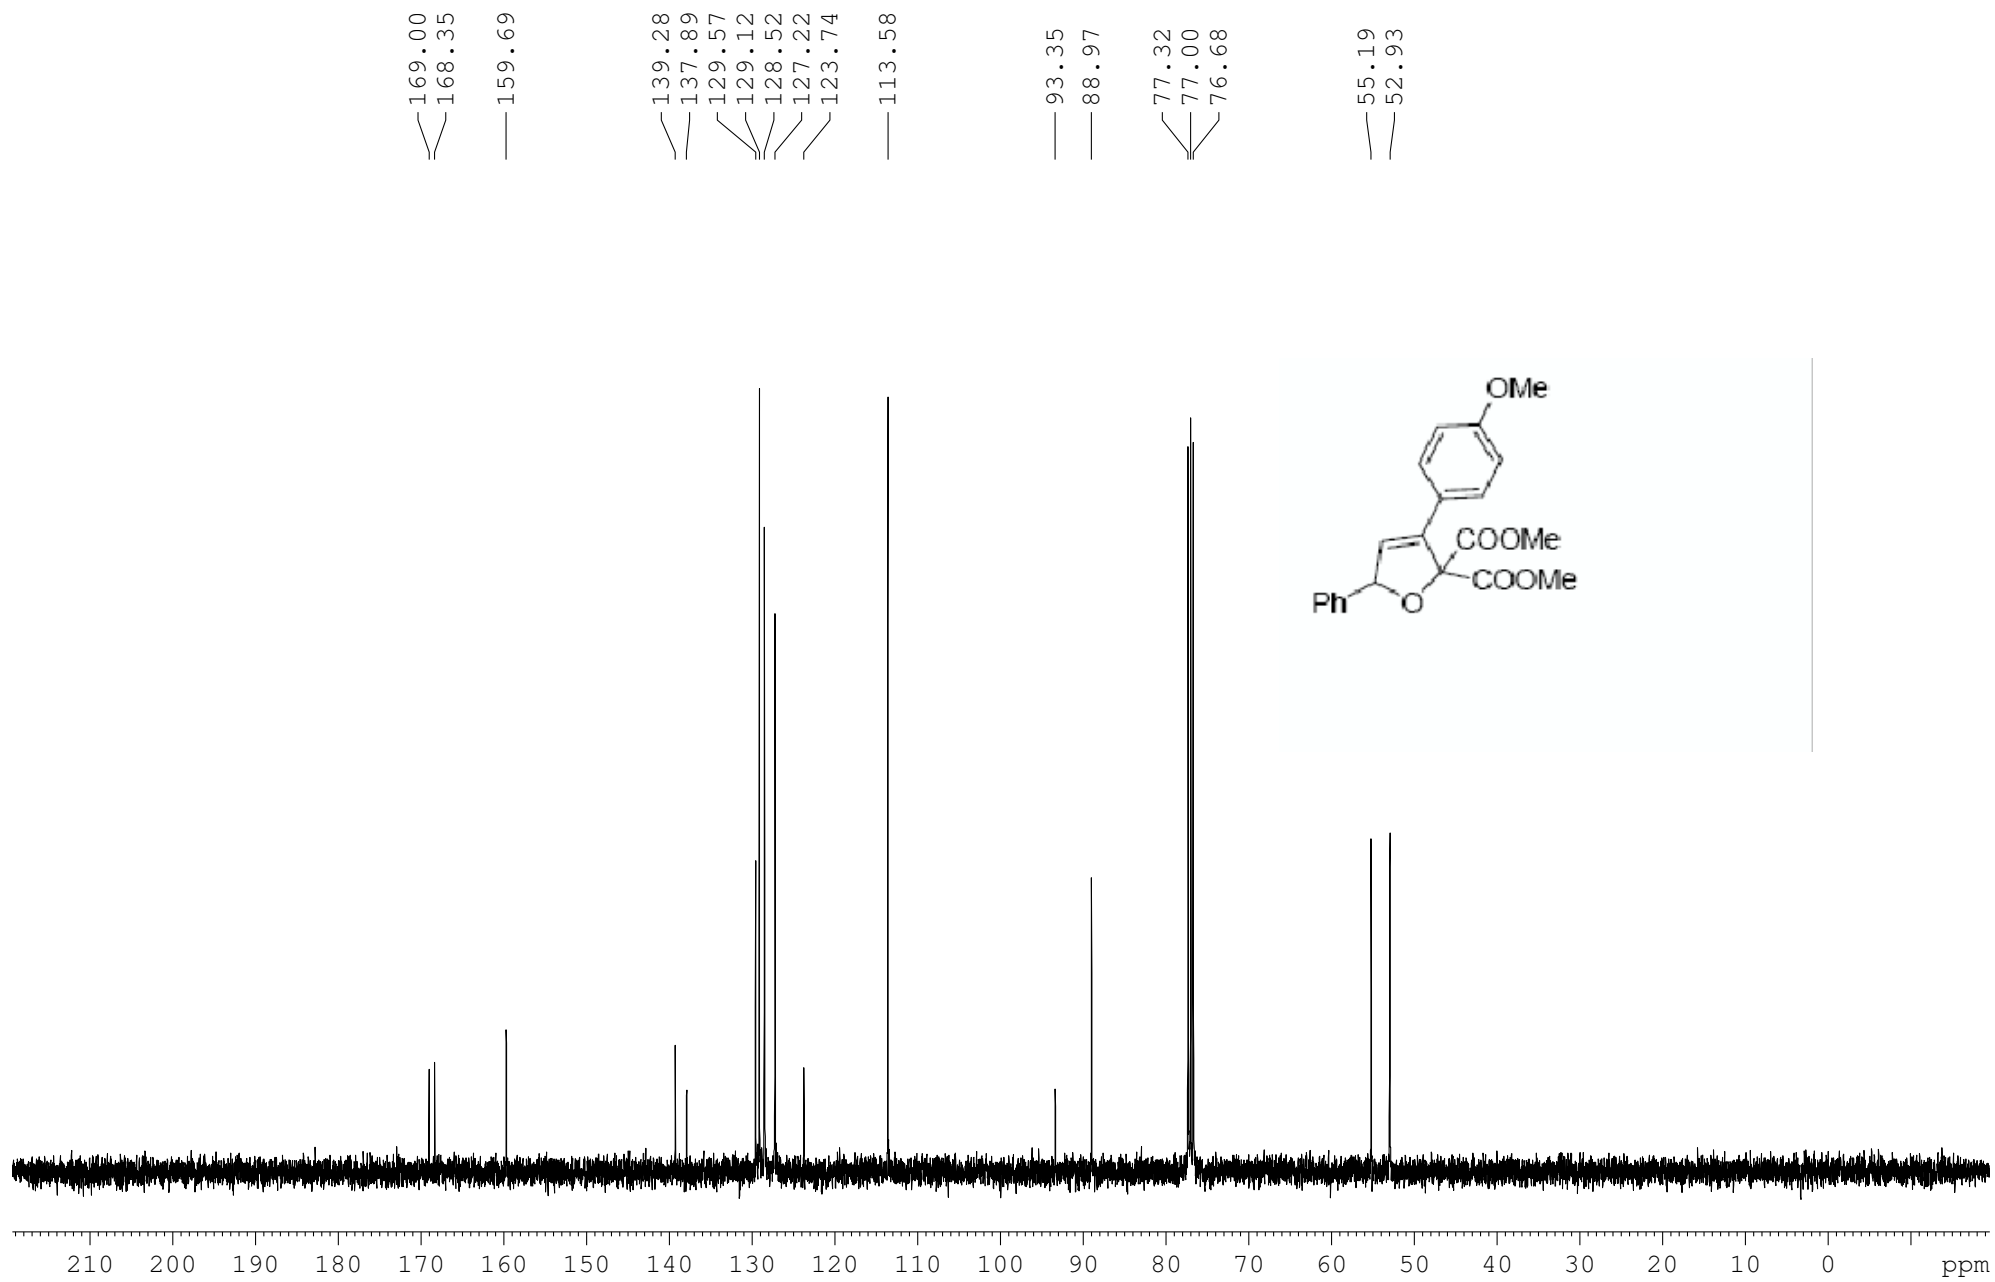

7.490  
7.472  
7.356  
7.260  
7.222  
7.212  
7.027  
7.009  
6.993  
6.859  
6.839  
6.129

4.887  
4.854  
4.815  
4.781

3.803  
3.638

1.594

0.000

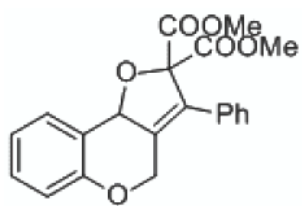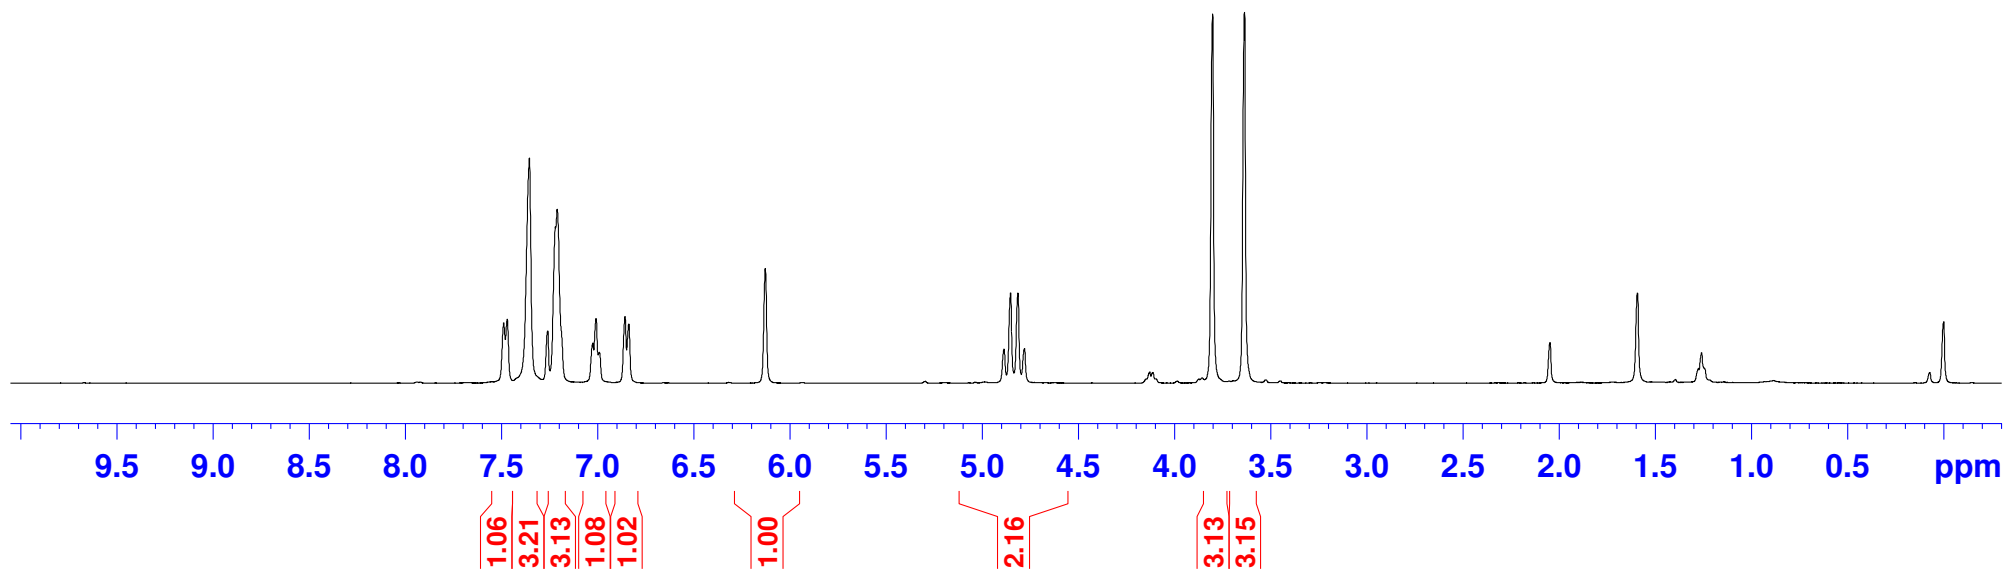

168.34  
167.33  
152.67  
136.15  
132.45  
131.01  
129.13  
129.06  
128.56  
128.28  
126.42  
124.80  
121.45  
116.67  
96.25  
81.56  
77.32  
77.00  
76.68  
62.82  
52.89  
52.81

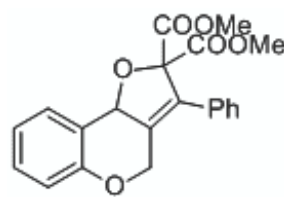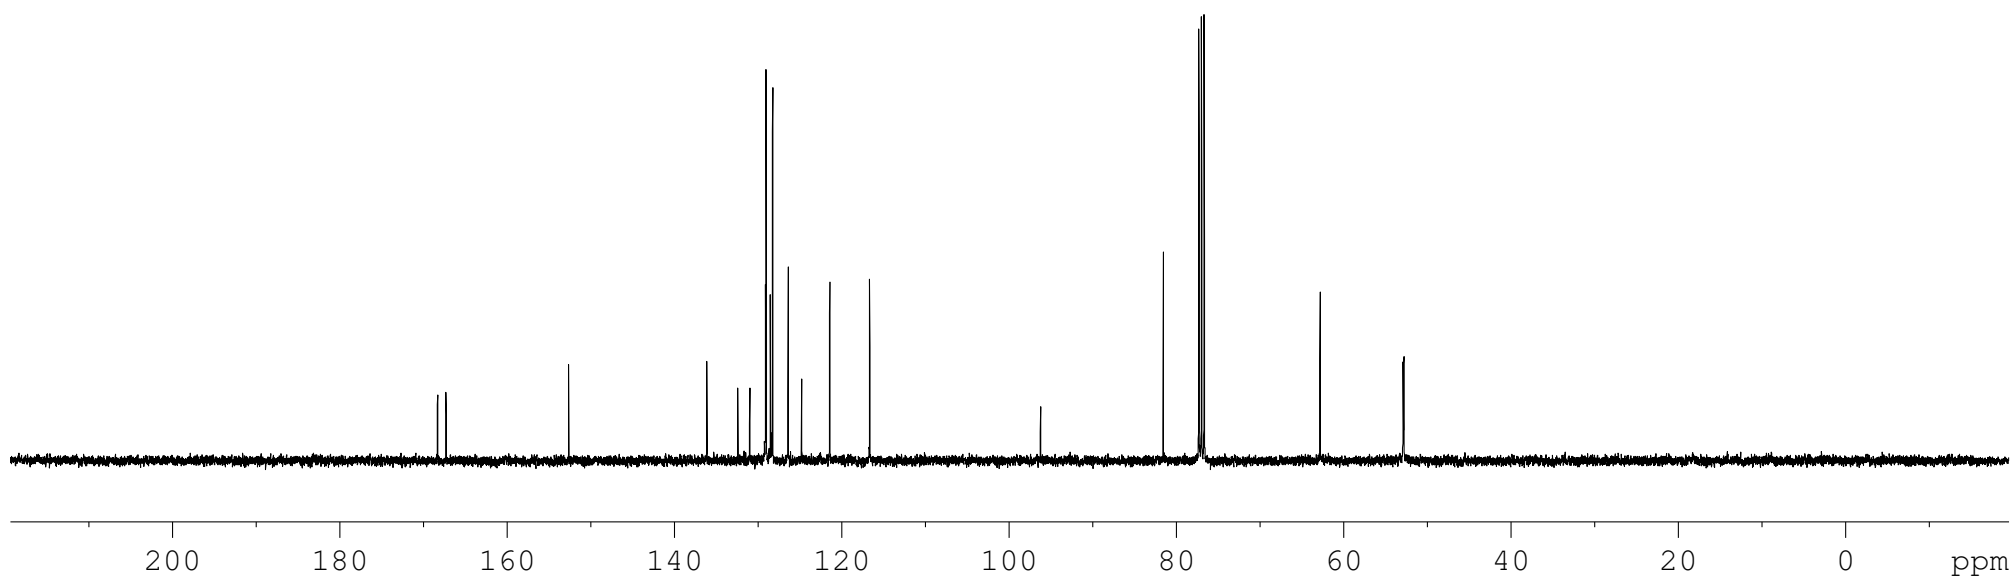



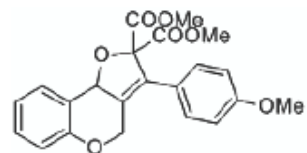

7.476  
7.457  
7.261  
7.218  
7.199  
7.164  
7.146  
7.016  
6.998  
6.980  
6.895  
6.877  
6.853  
6.832  
6.102

4.894  
4.860  
4.833  
4.800

3.816  
3.796  
3.646

— -0.000

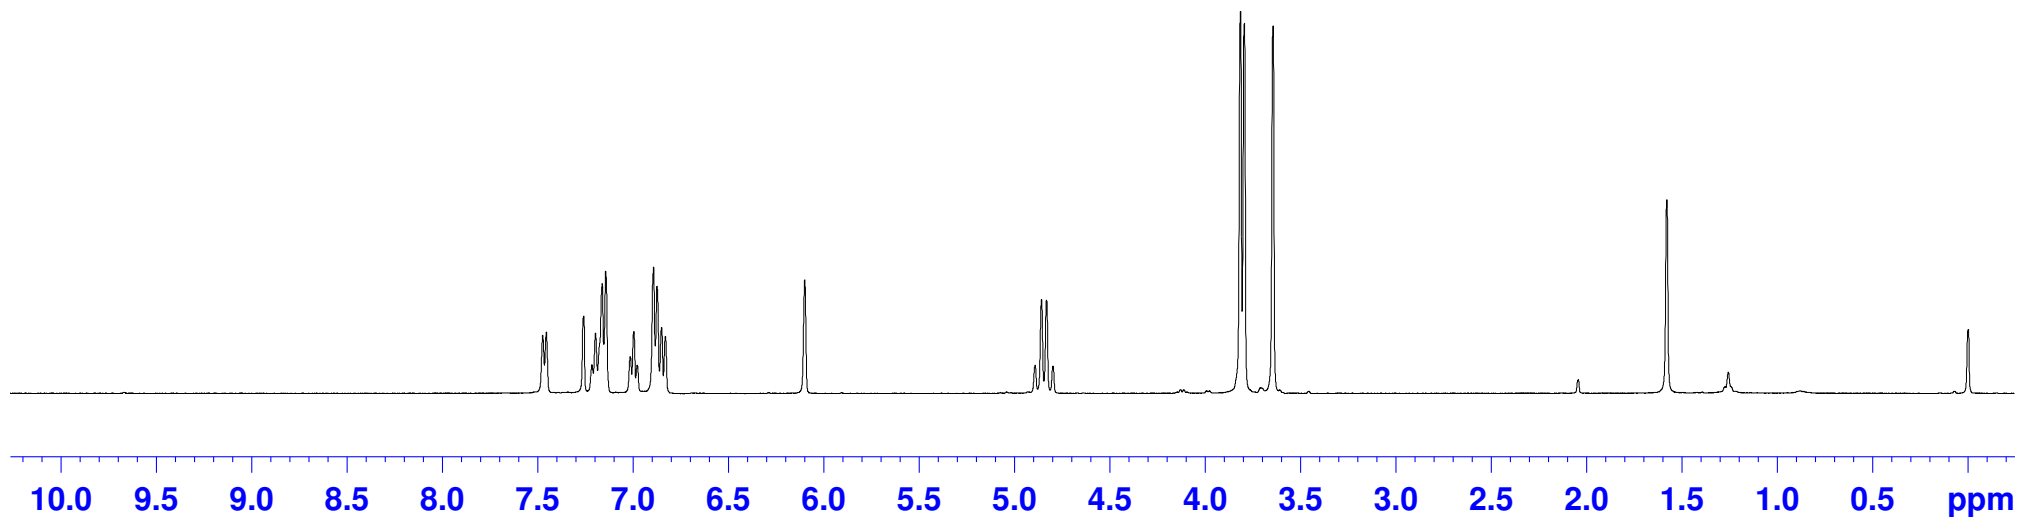

1.05

3.15

1.05

3.12

1.00

2.09

6.32

3.10

168.49  
167.54  
159.75  
152.75  
135.20  
132.20  
130.80  
130.47  
129.13  
126.42  
124.98  
123.17  
121.46  
116.71  
113.80  
96.18  
81.54  
77.38  
77.06  
76.74  
63.00  
55.23  
52.93

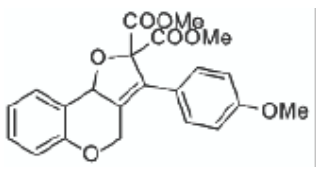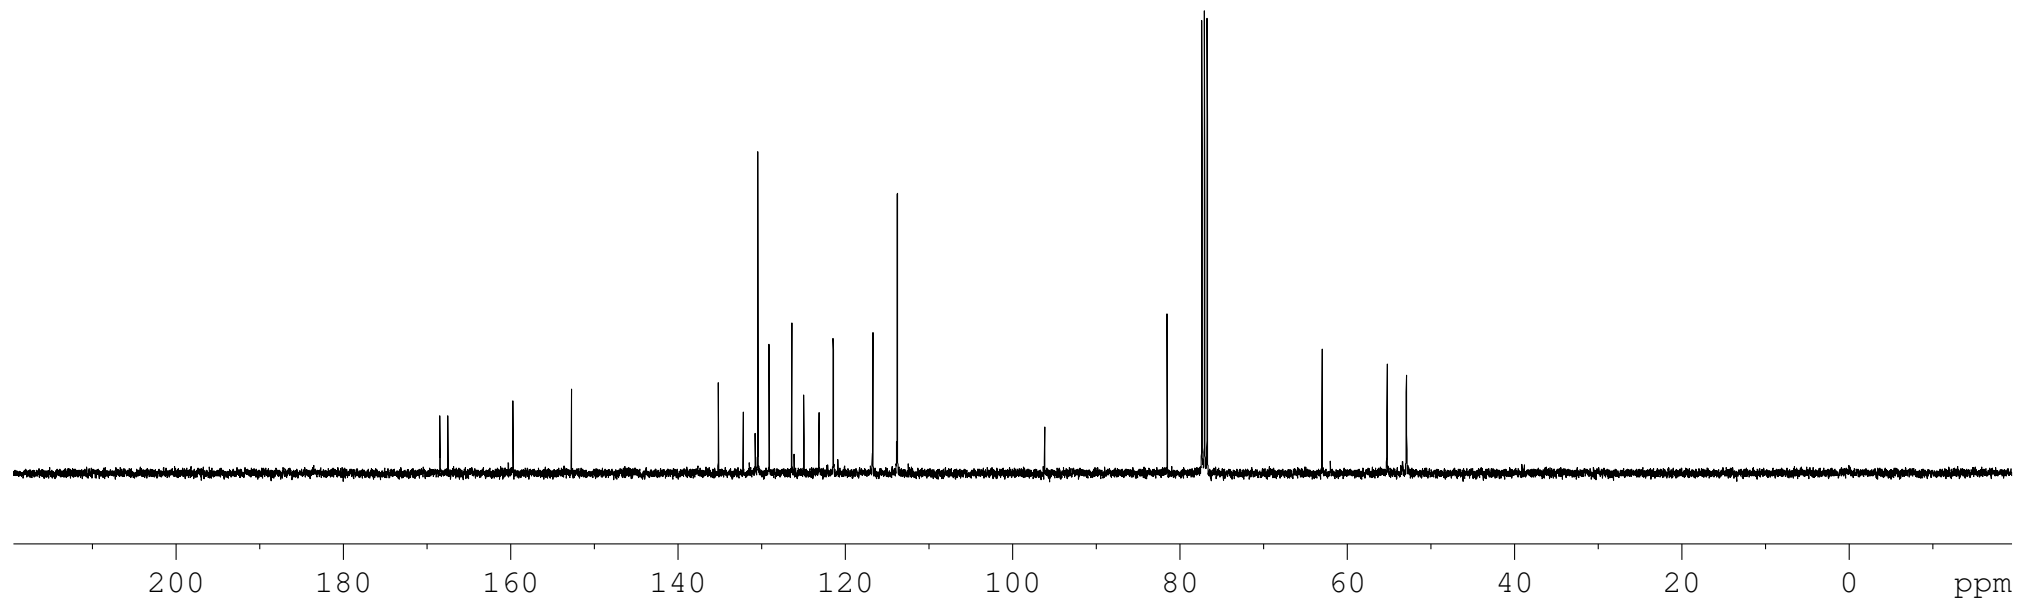

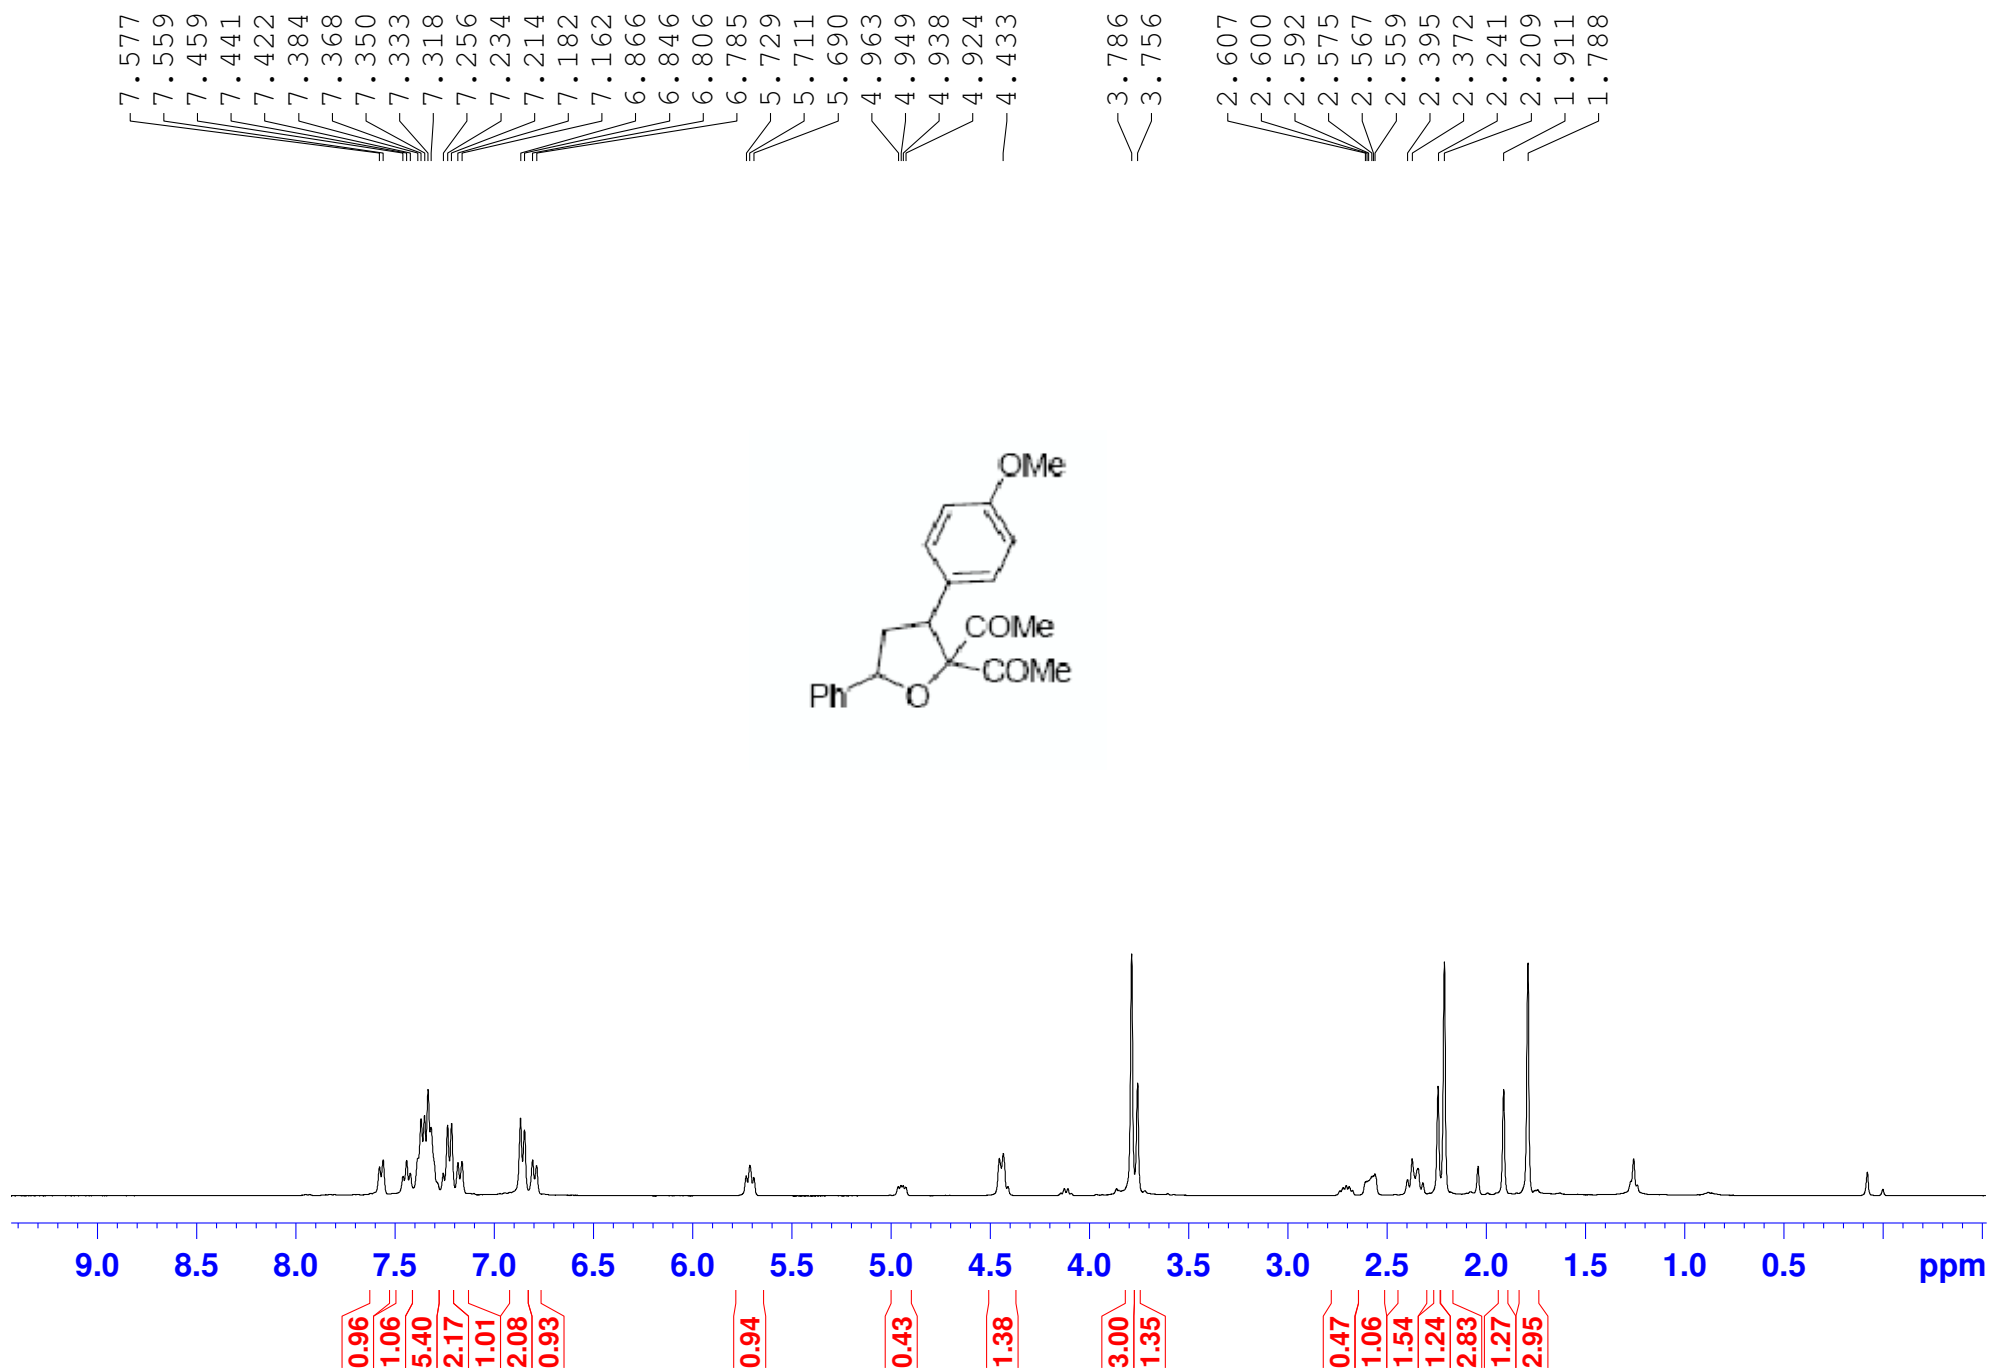

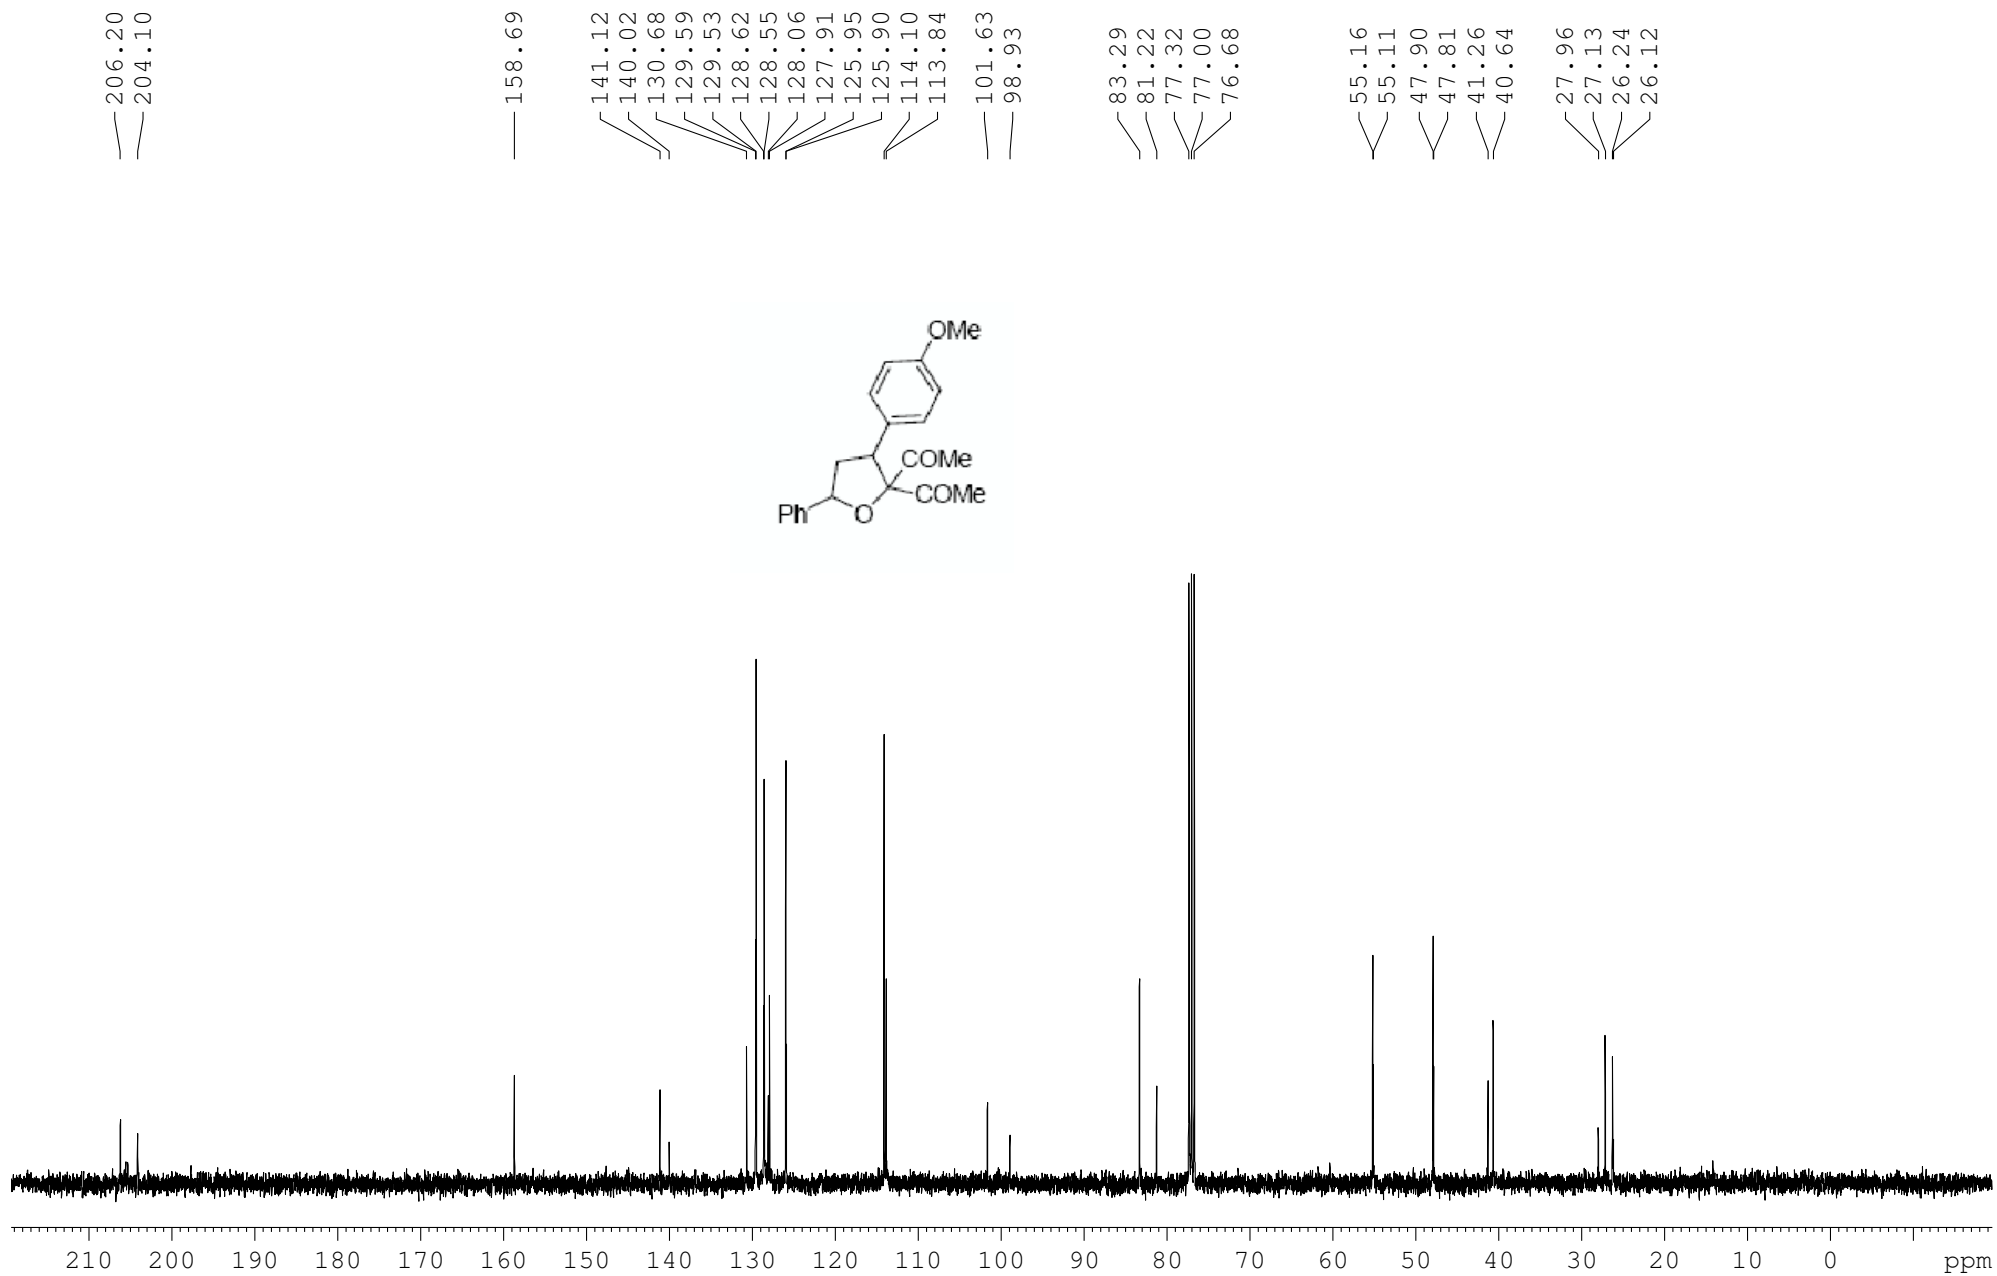

7.816  
7.798  
7.695  
7.676  
7.479  
7.461  
7.443  
7.411  
7.394  
7.376  
7.256  
6.966  
6.947  
6.893

3.853

2.559

1.253

0.000

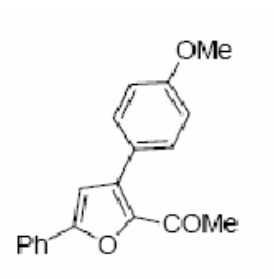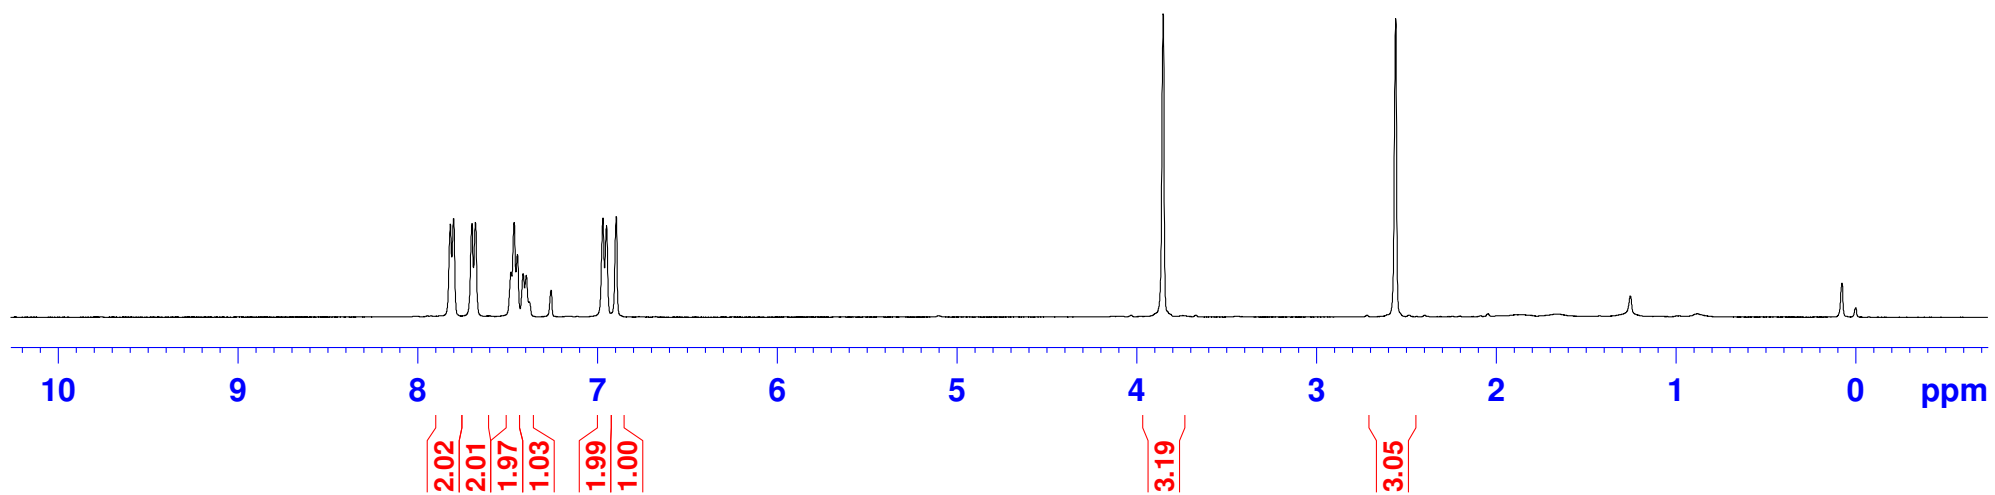

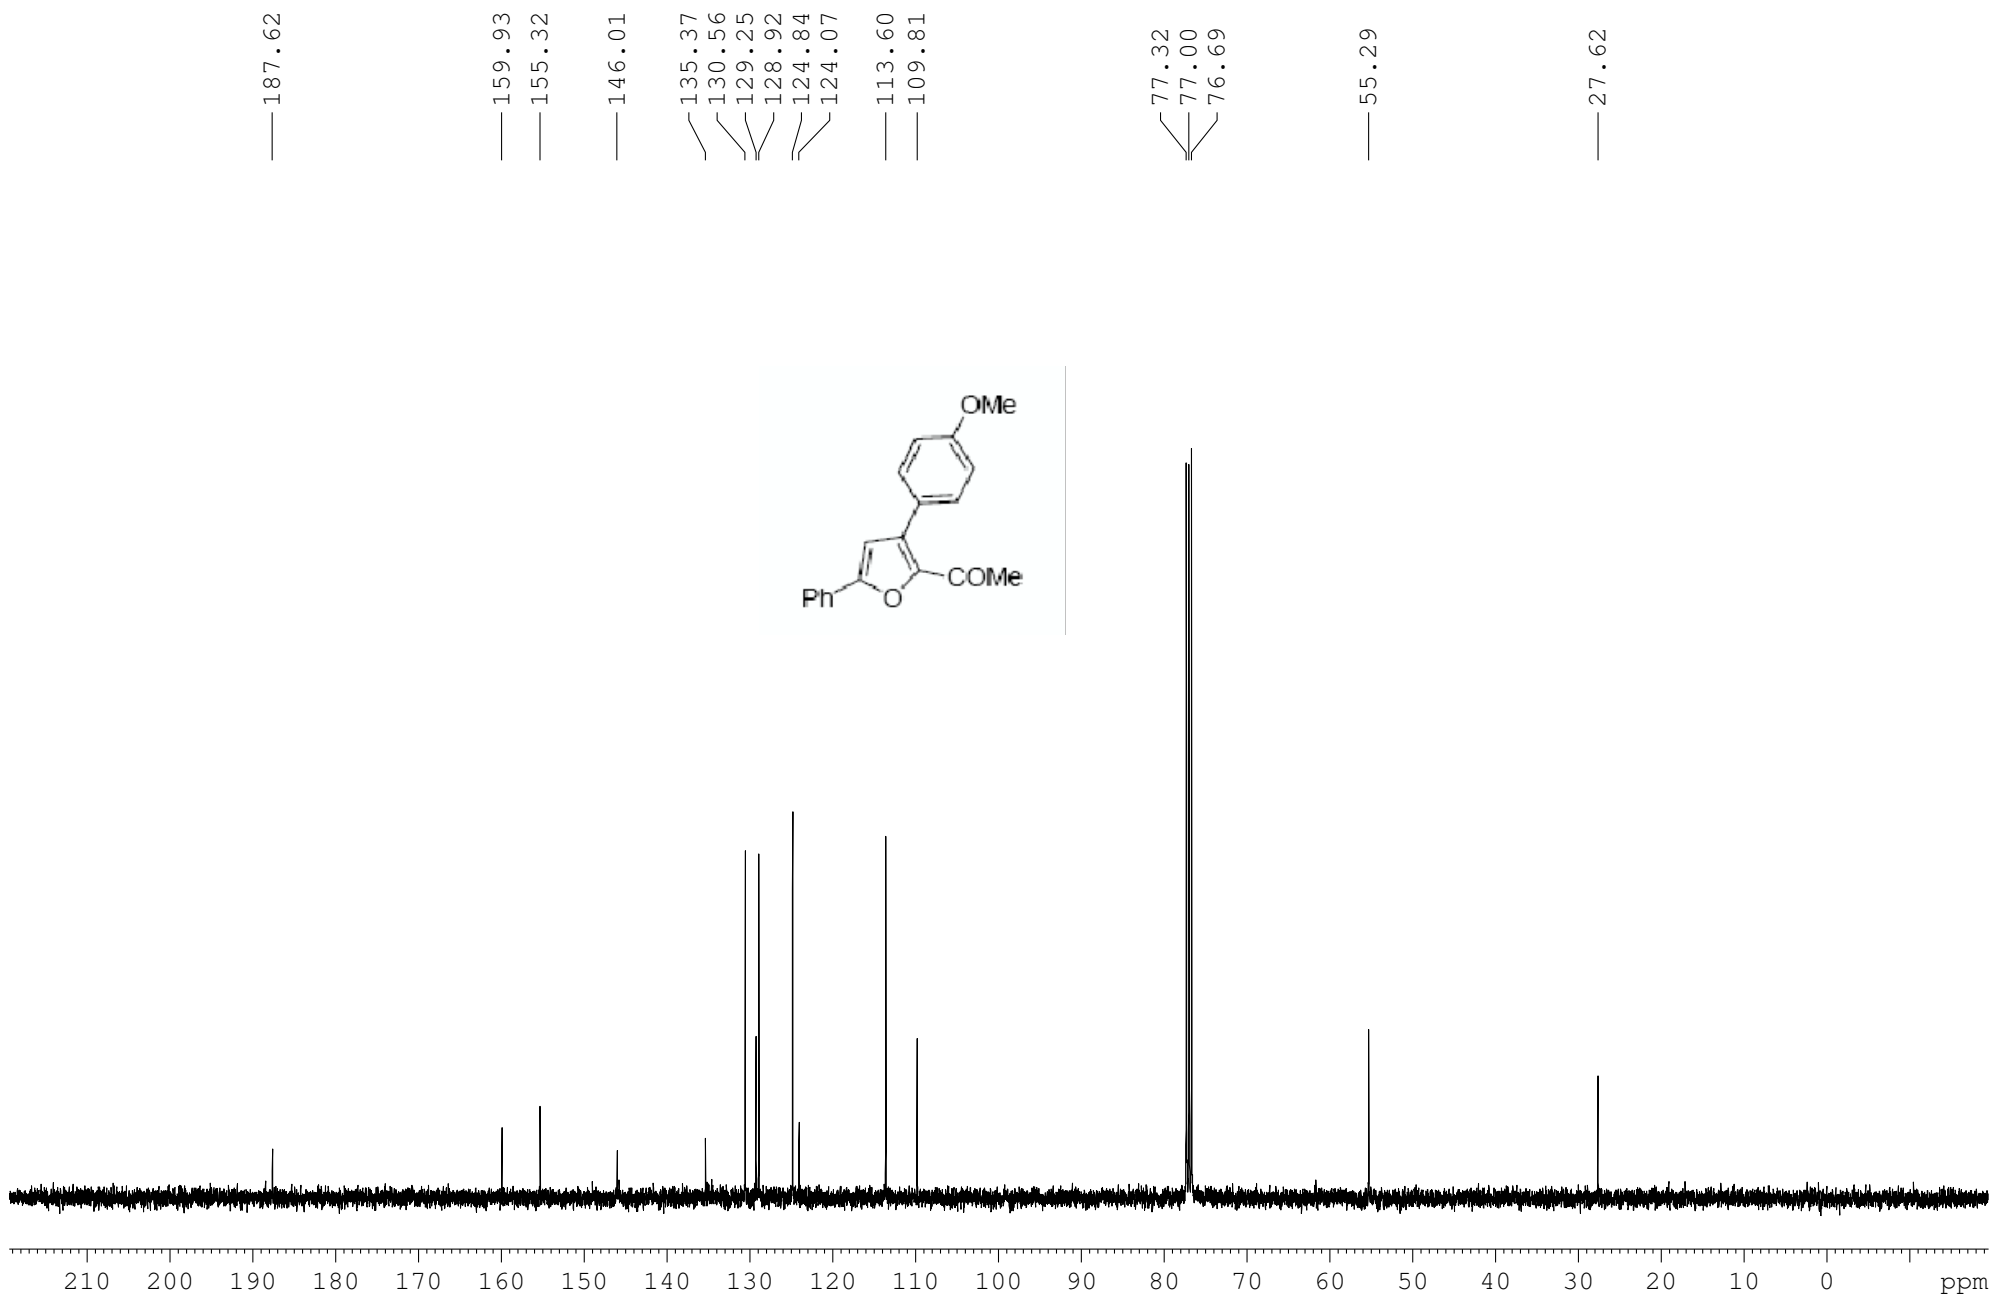

7.550  
7.531  
7.493  
7.435  
7.410  
7.392  
7.361  
7.346  
7.258  
6.896  
6.878

5.666  
5.642  
5.617

3.858  
3.820  
3.612  
3.584  
3.570  
3.543  
3.258  
3.235  
3.216  
3.193  
2.572  
2.338

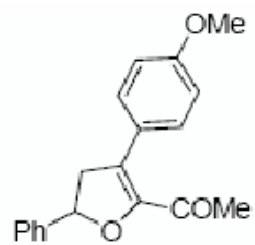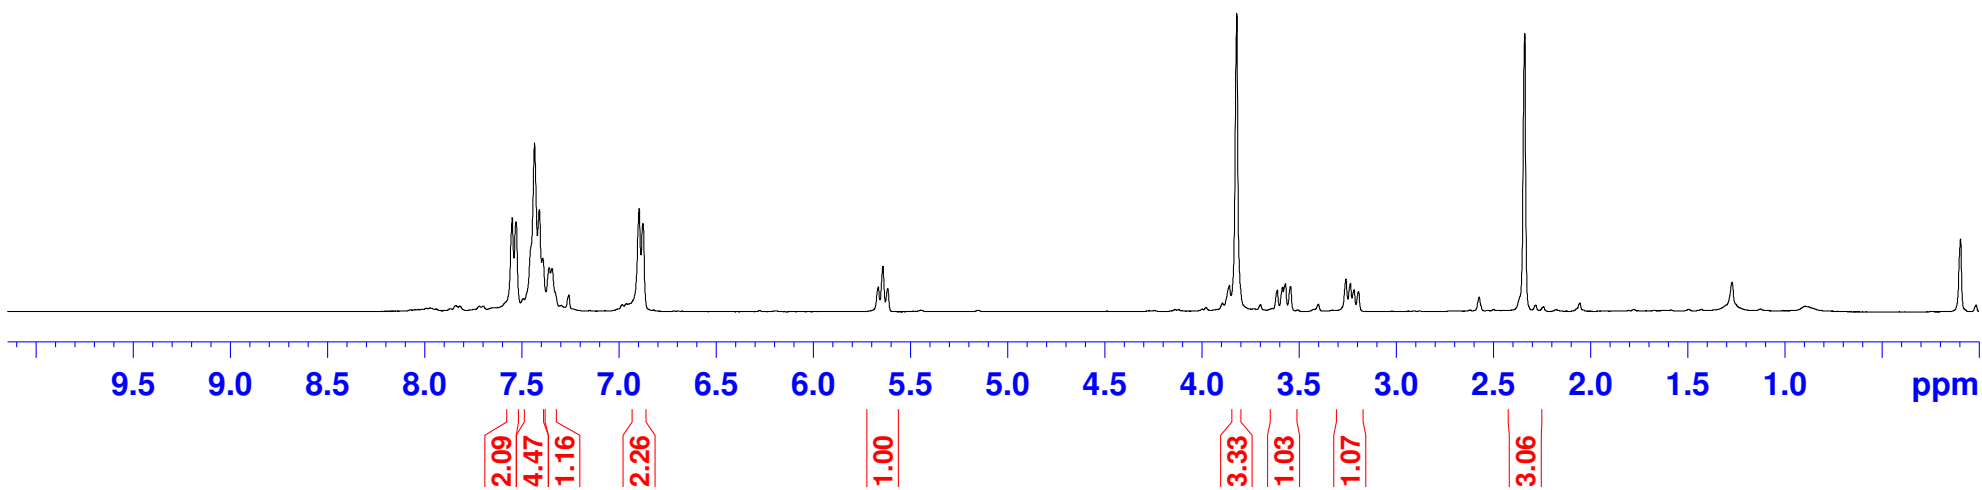

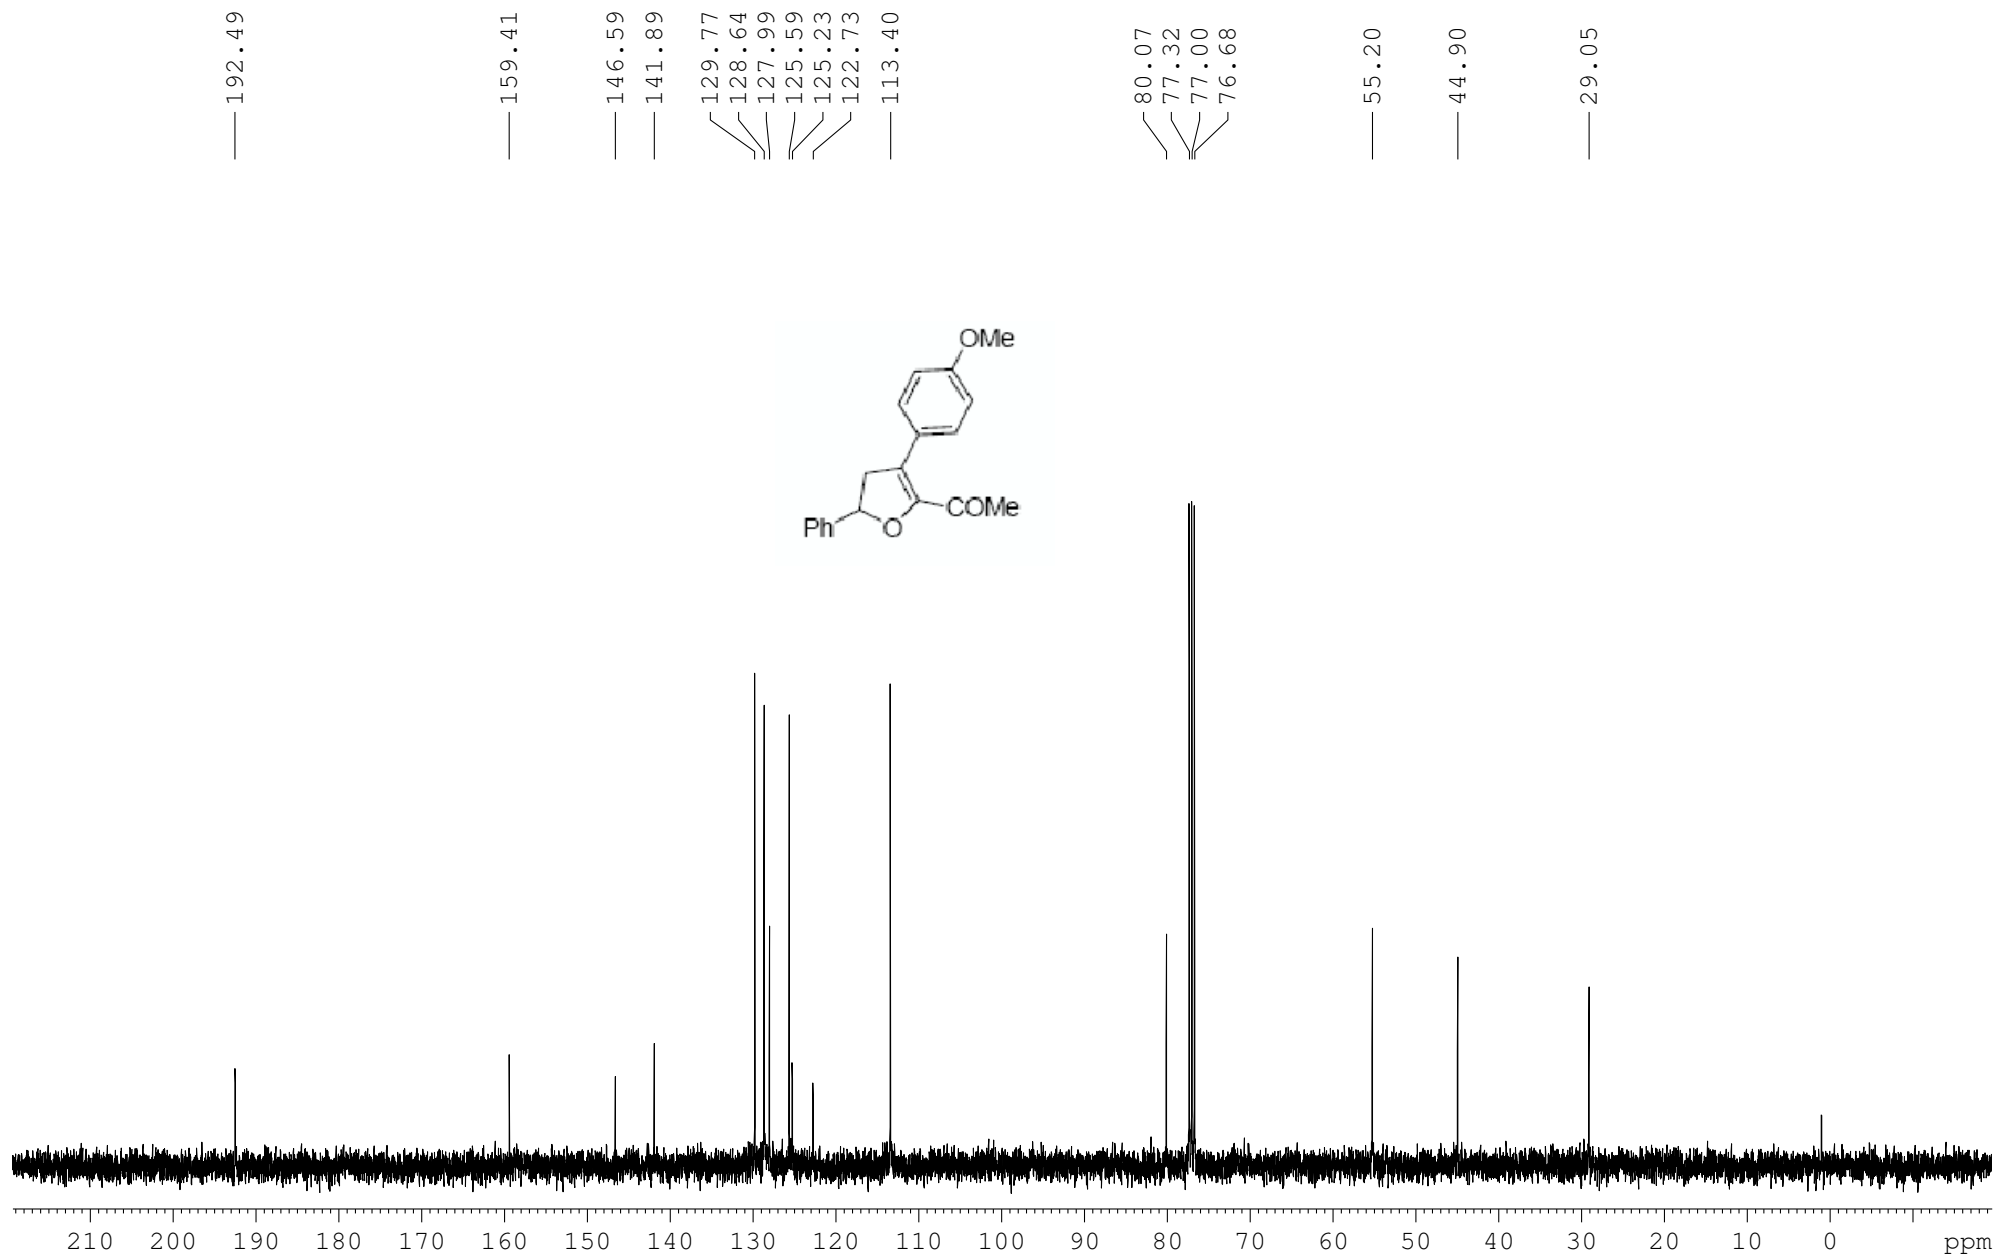



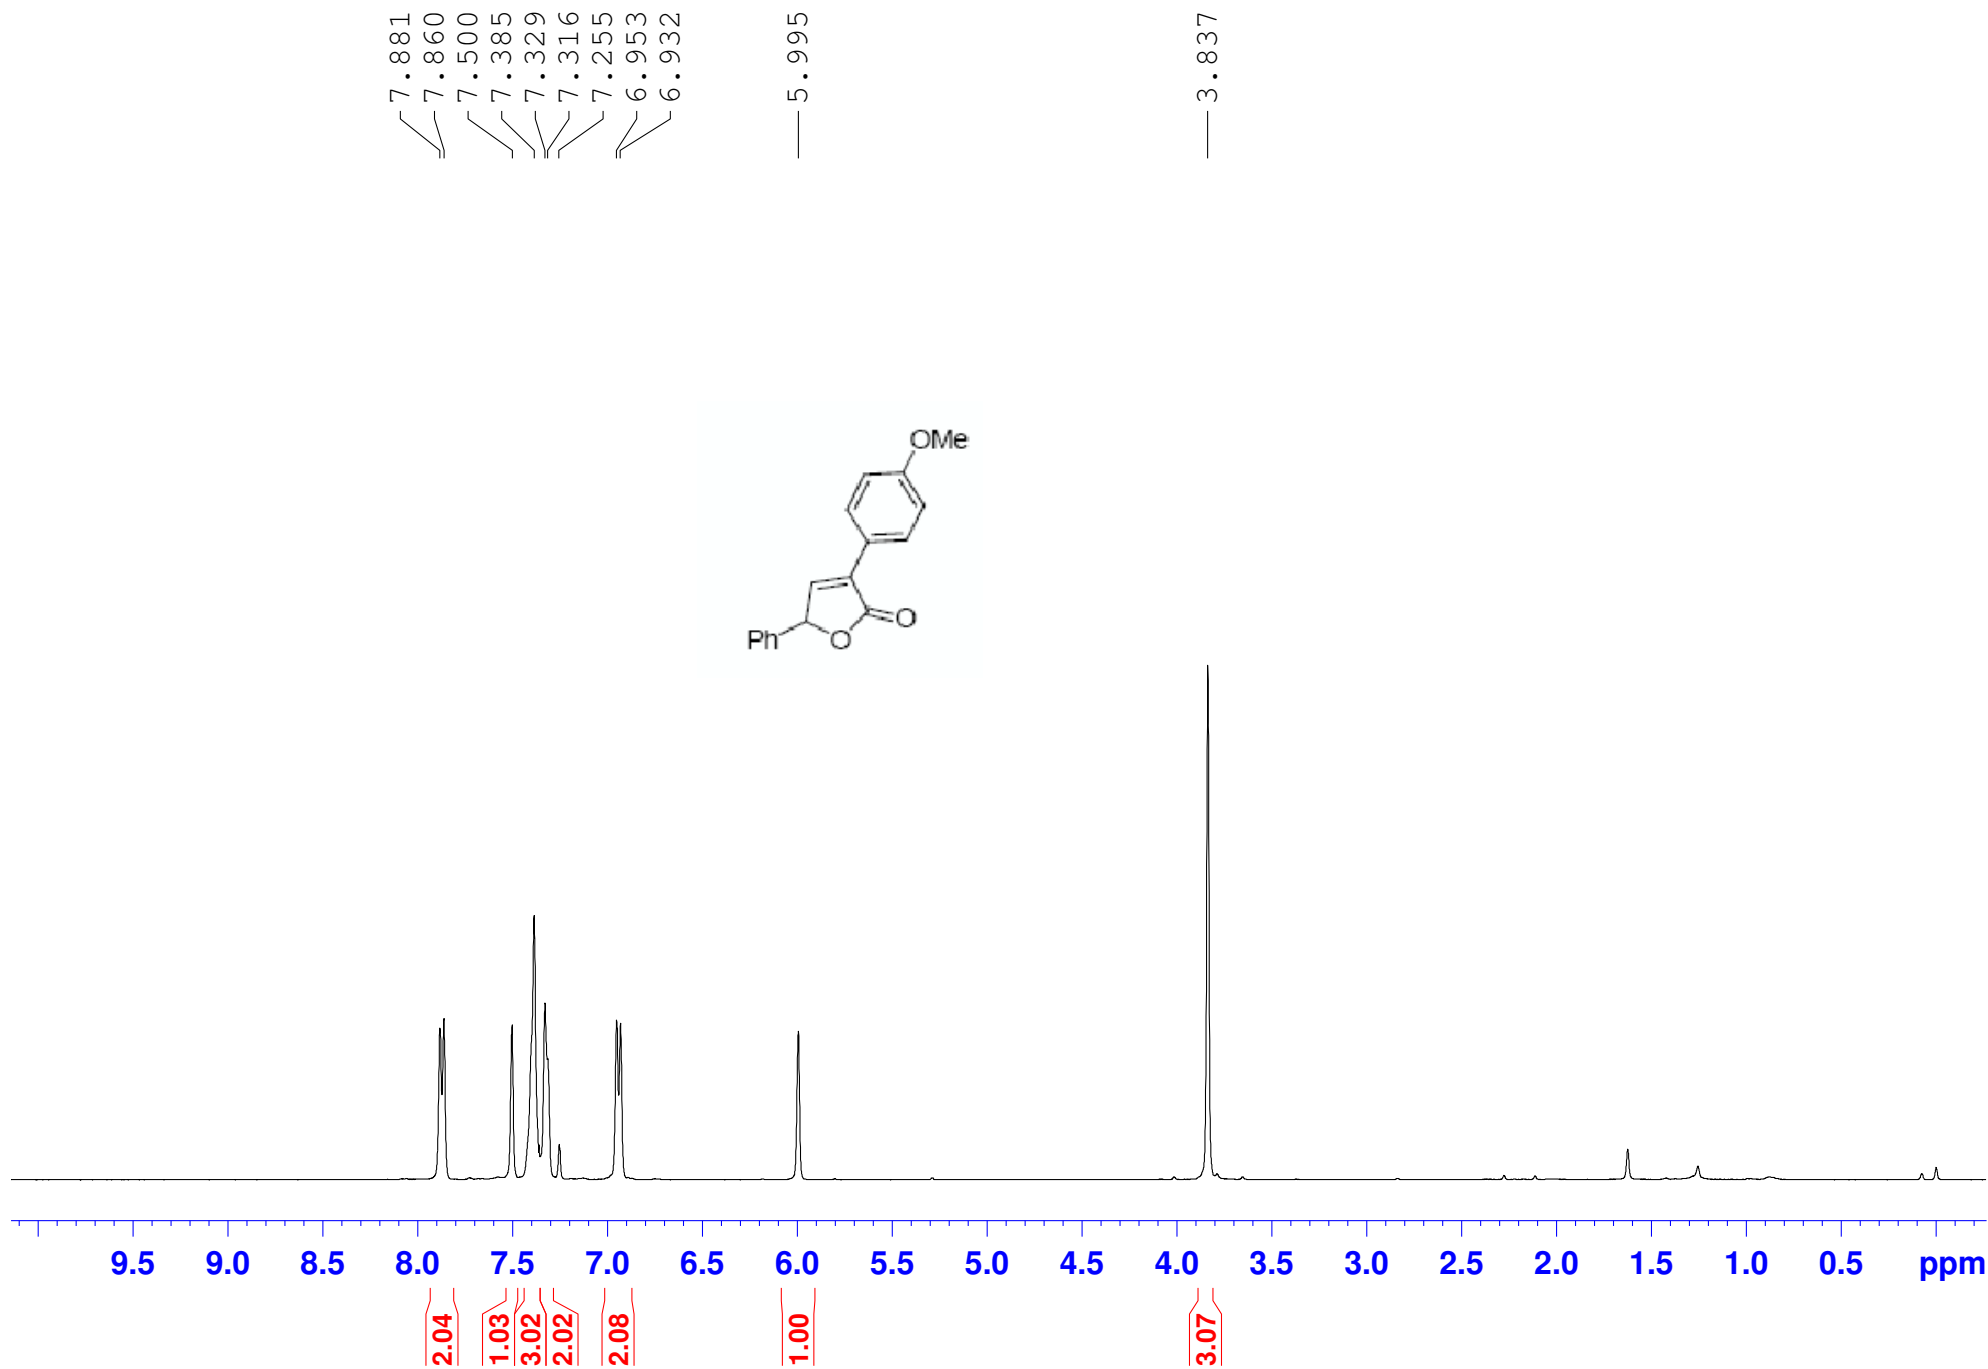

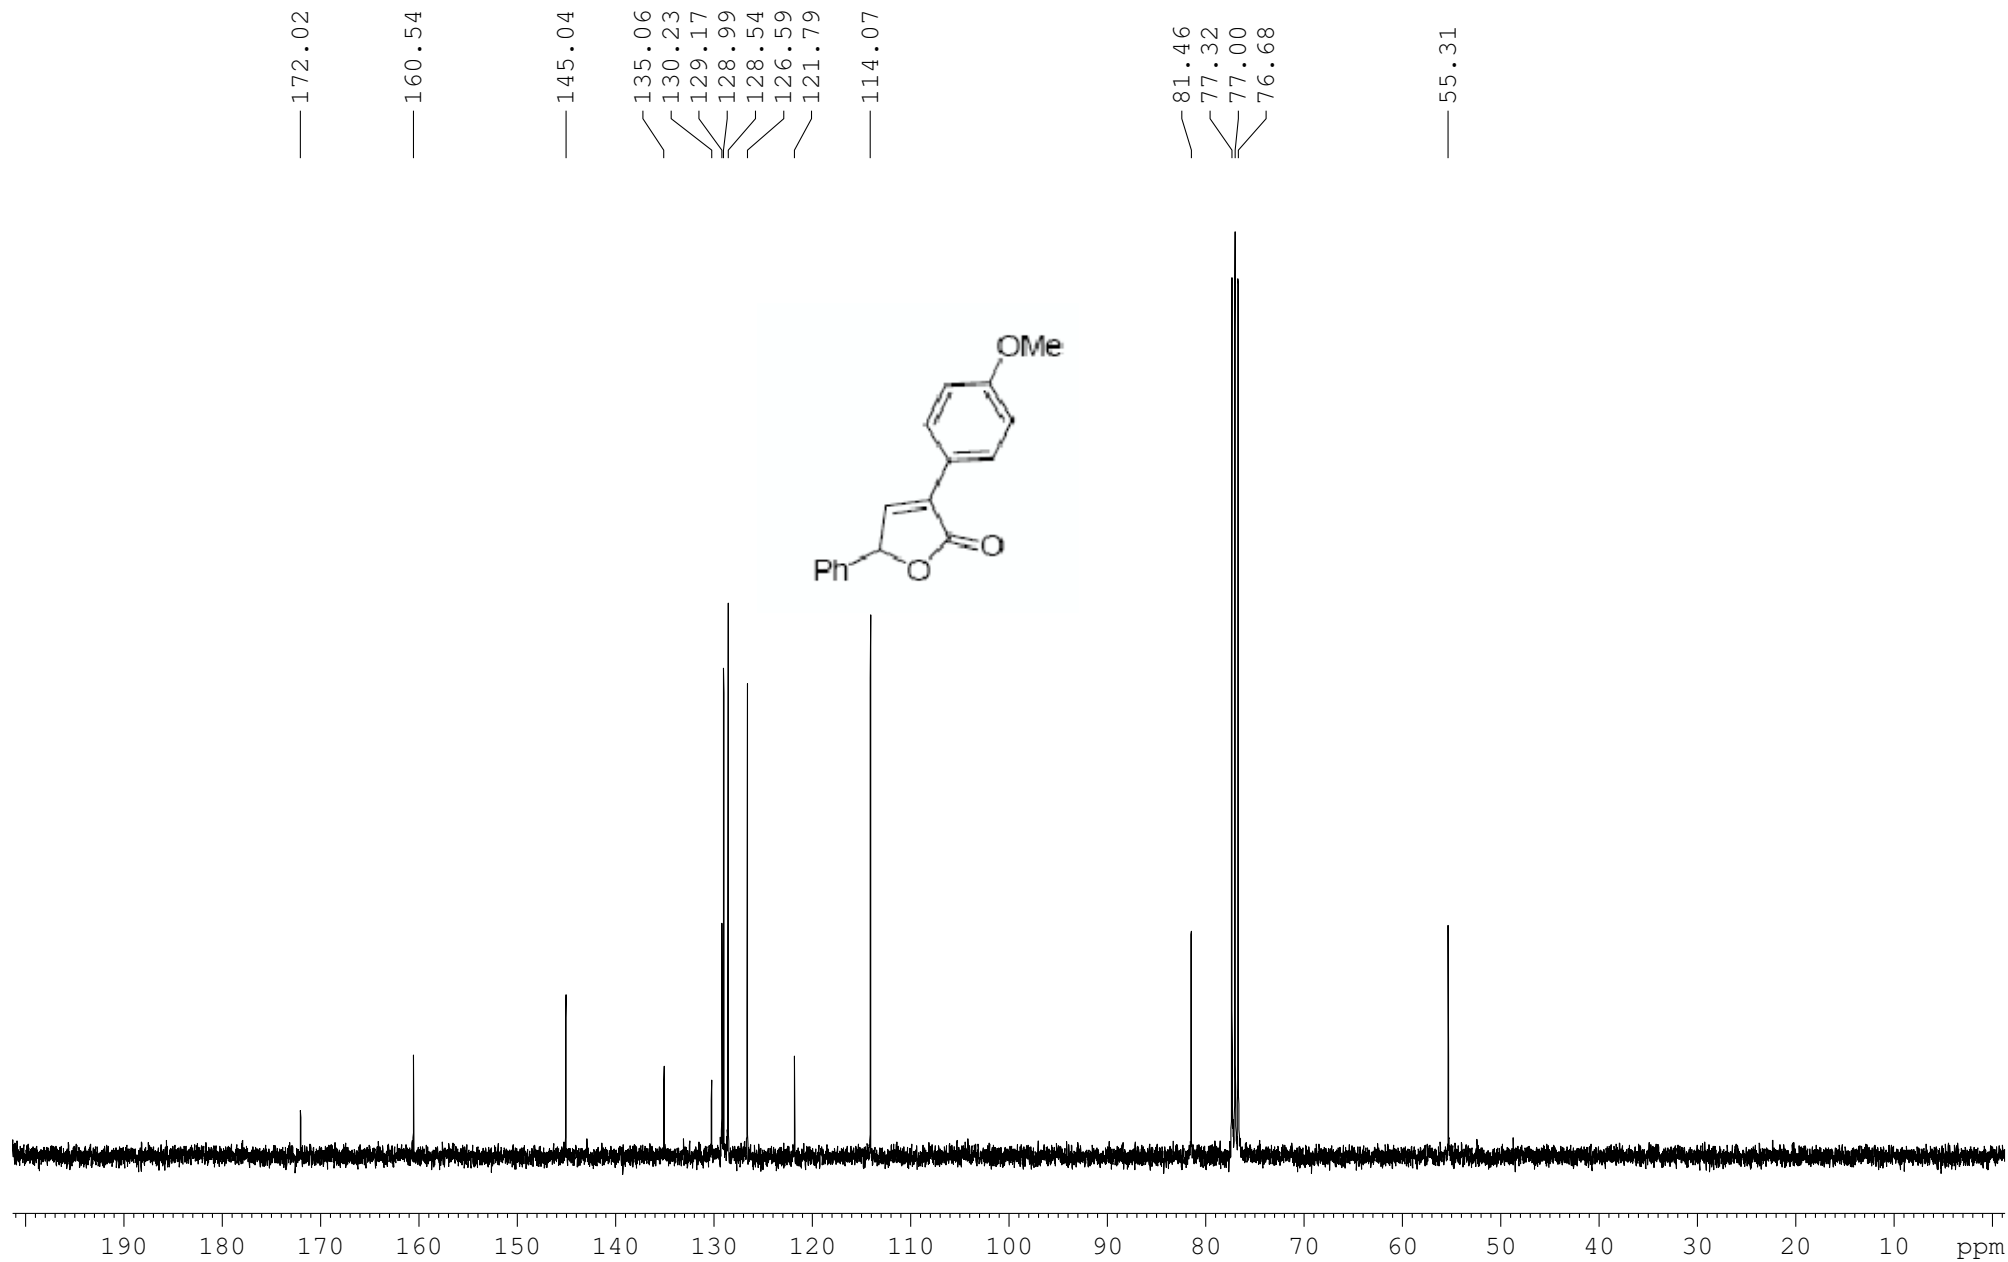

=====  
Acq. Operator :  
Acq. Instrument : HPLC1200LC Location : Vial 1  
Injection Date : 2010-12-2 5:30:33 下午  
Acq. Method : C:\CHEM32\1\METHODS\JWHTTEST.M  
Last changed : 2010-12-2 5:31:46 下午  
(modified after loading)  
Analysis Method : C:\CHEM32\1\DATA\JIANG\LRR-4-37-1-ODH-802008-217.D\DA.M (JWHTTEST.M)  
Last changed : 2011-6-27 11:25:02 上午

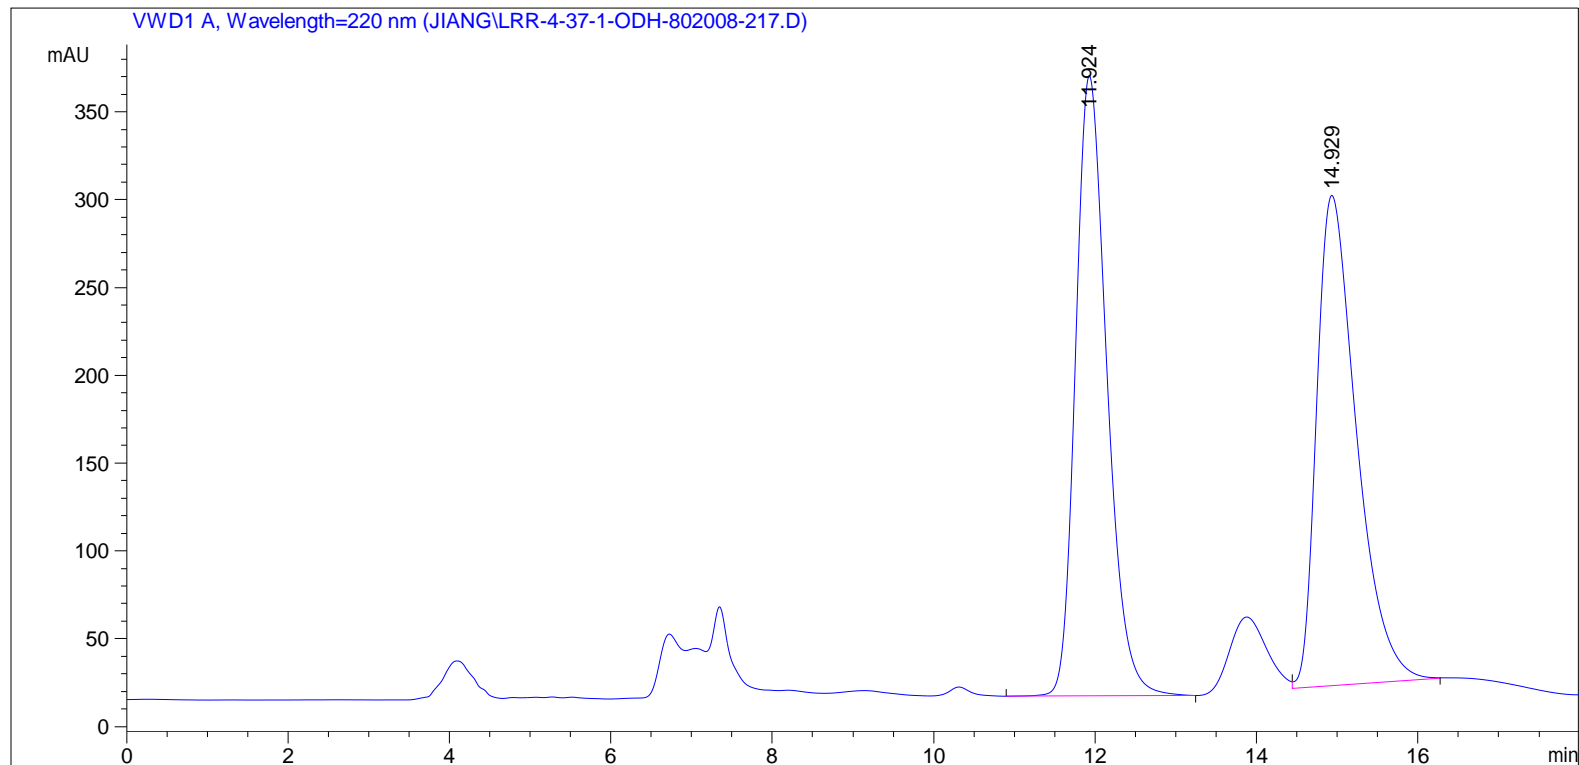

=====  
Area Percent Report  
=====

Sorted By : Signal  
Multiplier : 1.0000  
Dilution : 1.0000  
Use Multiplier & Dilution Factor with ISTDs

Signal 1: VWD1 A, Wavelength=220 nm

| Peak # | RetTime [min] | Type | Width [min] | Area mAU *s | Height [mAU] | Area %  |
|--------|---------------|------|-------------|-------------|--------------|---------|
| 1      | 11.924        | VV   | 0.4171      | 9544.48145  | 353.24939    | 49.8994 |
| 2      | 14.929        | VB   | 0.5239      | 9582.97363  | 279.37442    | 50.1006 |

Totals : 1.91275e4 632.62381

=====  
Acq. Operator :  
Acq. Instrument : HPLC1200LC Location : -  
Injection Date : 2010-12-8 2:50:22 下午  
Acq. Method : C:\CHEM32\1\METHODS\JWHTTEST.M  
Last changed : 2010-12-8 2:48:28 下午  
(modified after loading)  
Analysis Method : C:\CHEM32\1\DATA\JIANG\LRR-4-42-2-ODH-802008-1.D\DA.M (JWHTTEST.M)  
Last changed : 2011-6-27 11:21:13 上午

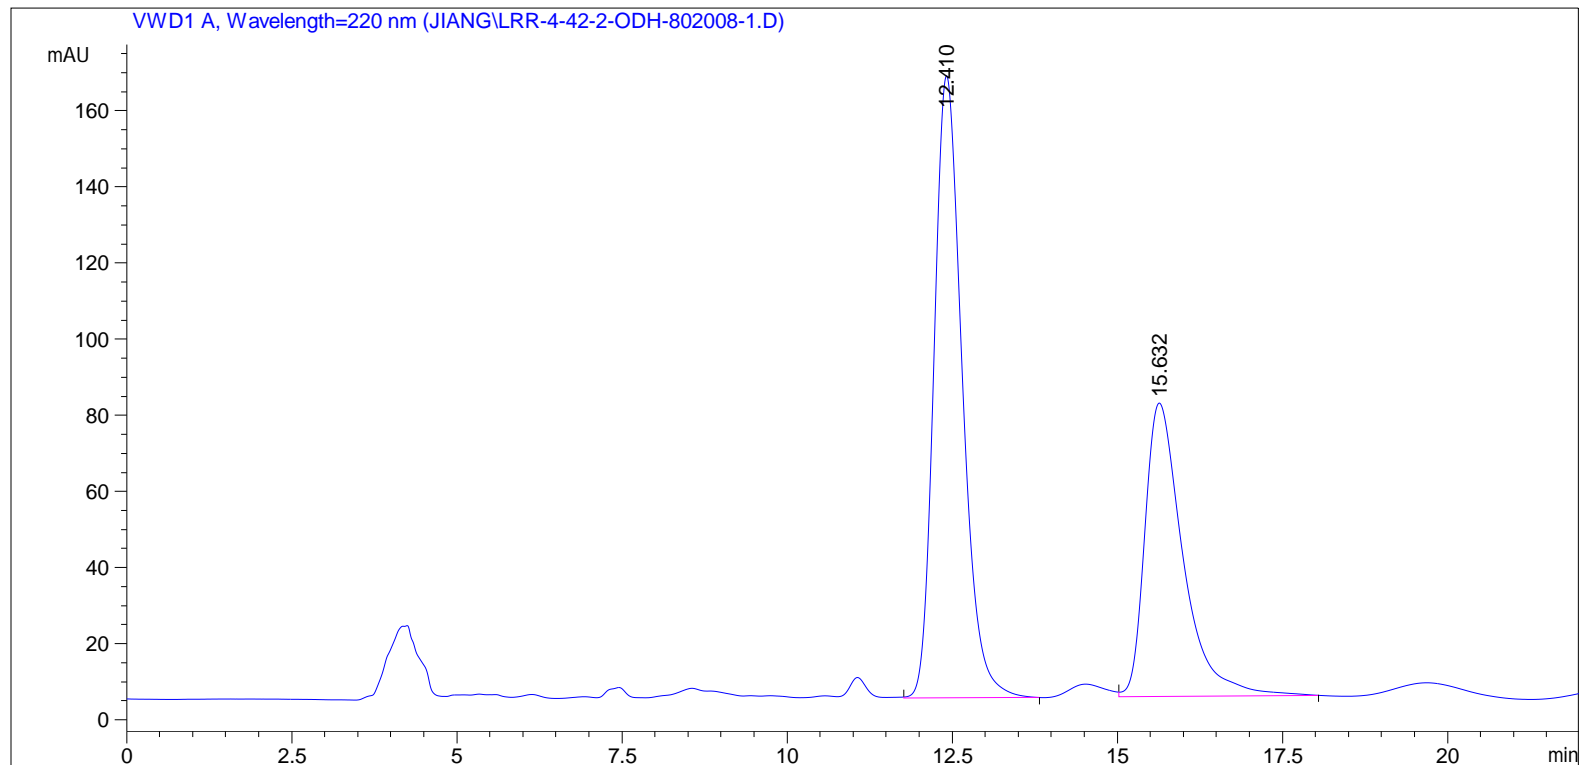

=====  
Area Percent Report  
=====

Sorted By : Signal  
Multiplier : 1.0000  
Dilution : 1.0000  
Use Multiplier & Dilution Factor with ISTDs

Signal 1: VWD1 A, Wavelength=220 nm

| Peak # | RetTime [min] | Type | Width [min] | Area mAU *s | Height [mAU] | Area %  |
|--------|---------------|------|-------------|-------------|--------------|---------|
| 1      | 12.410        | BB   | 0.4550      | 4844.50146  | 163.45033    | 60.8920 |
| 2      | 15.632        | VB   | 0.6058      | 3111.39355  | 77.16866     | 39.1080 |

Totals : 7955.89502 240.61900
